# Supplementary material
Source: publisher figshare collection journal article supplement (https://gsajournals.figshare.com/ndownloader/files/26732711)
Supplement: Supplementary file 1 [file 26732711]

## Sheet: A - Crematogaster
Supplementary Table S10: All reads of A) cryptic Crematogaster species and B) cryptic Camponotus species. The tables show the transcript Ids, BLAST results against the NCBI non-redundant invertebrate data base and raw read counts per sample.
target_id	BLAST result	59_PAR_Cr_FB2	63_PAR_Cr_FB2	64_PAR_Cr_FB2	69_PAR_Cr_FB2	74_PAR_Cr_FB2	75_PAR_Cr_FB1	76_PAR_Cr_FB2	218_PAT_Cr_FB1	219_PAT_Cr_FB1	222_PAT_Cr_FB2	230_PAT_Cr_FB2	231_PAT_Cr_FB1	232_PAT_Cr_FB1	240_PAT_Cr_FB2	242_PAT_Cr_FB2
CrematogasterSubCLCMeta_c1	ref|XP_011866080.1| PREDICTED: CAD protein [Vollenhovia emeryi]	101	342	69	117	153	317	107	123	226	7	2594	87	522	156	156
CrematogasterSubCLCMeta_c2	ref|XP_011693078.1| PREDICTED: uncharacterized protein LOC105453073 isoform X2 [Wasmannia auropunctata]	217	175	191	123	182	246	107	138	188	213	902	254	259	190	236
CrematogasterSubCLCMeta_c3	ref|XP_011694352.1| PREDICTED: uncharacterized protein LOC105453830 [Wasmannia auropunctata]	53	130	2	57	54	133	161	35	126	142	103	71	33	58	133
CrematogasterSubCLCMeta_c4	ref|XP_011879536.1| PREDICTED: uncharacterized protein LOC105568450 isoform X1 [Vollenhovia emeryi]	264	274	266	368	344	338	443	232	614	333	485	272	470	526	470
CrematogasterSubCLCMeta_c5	ref|XP_018059106.1| PREDICTED: Down syndrome cell adhesion molecule-like protein Dscam2 [Atta colombica]	0	0	0	0	49	84	33	0	53	0	0	2	0	0	21
CrematogasterSubCLCMeta_c6	ref|XP_019697737.1| PREDICTED: uncharacterized protein LOC105184963 [Harpegnathos saltator]	66	70	53	36	73	57	30	192	110	69	37	110	60	30	80
CrematogasterSubCLCMeta_c7	ref|XP_011647012.1| PREDICTED: uncharacterized protein LOC105433400 [Pogonomyrmex barbatus]	457	162	98	61	49	352	58	56	45	123	0	491	145	361	178
CrematogasterSubCLCMeta_c8	ref|XP_022183530.1| zinc finger MYM-type protein 1-like [Myzus persicae]	0	27	0	6	25	27	38	0	44	0	42	22	6	0	17
CrematogasterSubCLCMeta_c9	ref|XP_011879370.1| PREDICTED: ADAMTS-like protein 3 isoform X3 [Vollenhovia emeryi]	18	176	150	76	244	345	209	50	345	74	151	146	67	119	261
CrematogasterSubCLCMeta_c10	#N/A	19	7	20	0	20	66	13	6	7	10	18	23	0	21	38
CrematogasterSubCLCMeta_c11	ref|XP_019889918.1| PREDICTED: Down syndrome cell adhesion molecule-like protein Dscam2 isoform X3 [Ooceraea biroi]	50	401	227	49	197	717	164	74	162	136	495	335	94	271	711
CrematogasterSubCLCMeta_c12	ref|XP_011690957.1| PREDICTED: kynurenine/alpha-aminoadipate aminotransferase, mitochondrial-like [Wasmannia auropunctata]	253	56	987	119	49	37	46	53	513	322	11986	180	18	238	64
CrematogasterSubCLCMeta_c13	ref|XP_018369781.1| PREDICTED: uncharacterized protein LOC108765517 [Trachymyrmex cornetzi]	93	119	133	143	104	221	143	89	245	177	416	168	223	178	204
CrematogasterSubCLCMeta_c14	ref|XP_011695183.1| PREDICTED: alpha-ketoglutarate-dependent dioxygenase alkB homolog 4 [Wasmannia auropunctata]	695	608	552	543	2101	617	354	1532	1436	605	749	560	2383	482	727
CrematogasterSubCLCMeta_c15	ref|XP_018305117.1| PREDICTED: netrin receptor UNC5C-like [Trachymyrmex zeteki]	6	47	15	5	169	64	84	31	139	0	141	84	27	63	73
CrematogasterSubCLCMeta_c16	ref|XP_011859045.1| PREDICTED: uncharacterized protein LOC105556561 [Vollenhovia emeryi]	60	47	37	2670	23	57	2389	79	65	1087	68	318	6457	228	339
CrematogasterSubCLCMeta_c17	ref|XP_012522124.1| PREDICTED: papilin isoform X1 [Monomorium pharaonis]	128	102	266	160	144	955	270	224	33	0	182	502	1242	1593	435
CrematogasterSubCLCMeta_c18	ref|XP_011879616.1| PREDICTED: voltage-dependent calcium channel type A subunit alpha-1-like isoform X2 [Vollenhovia emeryi]	0	0	0	0	0	25	0	0	0	0	8	0	0	0	0
CrematogasterSubCLCMeta_c19	ref|XP_018346849.1| PREDICTED: LOW QUALITY PROTEIN: proteasome subunit alpha type-7-1-like [Trachymyrmex septentrionalis]	17	8	28	19	33	125	5	20	18	29	13	23	20	11	11
CrematogasterSubCLCMeta_c20	ref|XP_018356734.1| PREDICTED: LOW QUALITY PROTEIN: uncharacterized protein LOC108757006 [Trachymyrmex septentrionalis]	0	0	0	0	11	10	0	0	0	0	0	0	0	0	0
CrematogasterSubCLCMeta_c21	ref|XP_011864196.1| PREDICTED: uncharacterized protein LOC105560058 [Vollenhovia emeryi]	863	314	340	136	105	282	132	215	275	27	1022	414	832	411	155
CrematogasterSubCLCMeta_c22	#N/A	29	49	18	50	7	41	20	13	14	0	0	13	24	17	24
CrematogasterSubCLCMeta_c23	ref|XP_012542796.1| PREDICTED: connectin [Monomorium pharaonis]	64	58	8	39	60	69	64	45	96	12	48	58	33	126	88
CrematogasterSubCLCMeta_c24	#N/A	24	52	34	45	20	17	29	8	20	0	7	65	51	127	70
CrematogasterSubCLCMeta_c25	ref|XP_015756951.1| PREDICTED: collagen alpha-1(III) chain-like [Acropora digitifera]	47	8	31	64	10	12	12	13	13	158	31	19	27	77	24
CrematogasterSubCLCMeta_c26	ref|XP_011866611.1| PREDICTED: uncharacterized protein LOC105561339 [Vollenhovia emeryi]	11	40	64	72	25	124	42	16	42	60	202	66	89	93	46
CrematogasterSubCLCMeta_c27	ref|XP_011170040.1| PREDICTED: peptide deformylase, mitochondrial-like [Solenopsis invicta]	74	114	84	70	196	93	175	97	204	12	200	130	77	18	95
CrematogasterSubCLCMeta_c28	ref|XP_012523128.1| PREDICTED: GTP-binding protein Rhes isoform X1 [Monomorium pharaonis]	0	61	54	114	55	89	85	29	88	112	79	77	63	24	102
CrematogasterSubCLCMeta_c29	ref|XP_011155655.1| PREDICTED: lipoma HMGIC fusion partner-like 3 protein [Solenopsis invicta]	7	39	54	40	22	170	64	43	15	37	20	14	52	96	12
CrematogasterSubCLCMeta_c30	ref|XP_011880869.1| PREDICTED: uncharacterized protein LOC105569216 [Vollenhovia emeryi]	0	0	10	8	13	2	12	9	2	7	4	9	6	6	5
CrematogasterSubCLCMeta_c31	ref|XP_011869010.1| PREDICTED: sodium channel protein 60E-like [Vollenhovia emeryi]	0	27	44	15	36	71	73	28	84	0	25	28	31	18	62
CrematogasterSubCLCMeta_c32	ref|XP_011058494.1| PREDICTED: uncharacterized protein LOC105148454 isoform X2 [Acromyrmex echinatior]	6	55	15	30	75	238	100	17	165	14	218	25	31	30	183
CrematogasterSubCLCMeta_c33	ref|XP_011699717.1| PREDICTED: recQ-mediated genome instability protein 1-like isoform X1 [Wasmannia auropunctata]	14	16	82	37	39	204	12	37	10	133	83	72	76	34	52
CrematogasterSubCLCMeta_c34	ref|XP_018302906.1| PREDICTED: uncharacterized protein LOC108722341 isoform X1 [Trachymyrmex zeteki]	197	36	71	15	190	165	13	43	113	114	48	29	633	51	73
CrematogasterSubCLCMeta_c35	ref|XP_012059220.1| PREDICTED: uncharacterized protein LOC105622405 [Atta cephalotes]	16	56	6	30	20	132	56	26	70	25	21	66	7	5	98
CrematogasterSubCLCMeta_c36	ref|XP_011874257.1| PREDICTED: uncharacterized protein LOC105565563 [Vollenhovia emeryi]	25	53	57	41	92	36	128	91	152	79	33	62	184	60	83
CrematogasterSubCLCMeta_c37	ref|XP_018359928.1| PREDICTED: hemicentin-1 isoform X3 [Trachymyrmex cornetzi]	43	46	33	18	10	6	28	14	31	11	22	5	42	14	10
CrematogasterSubCLCMeta_c38	ref|XP_021205741.1| uncharacterized protein LOC105841937 [Bombyx mori]	15	121	10	34	77	125	77	6	114	1	64	93	2	20	77
CrematogasterSubCLCMeta_c39	ref|XP_018358761.1| PREDICTED: cytospin-A isoform X1 [Trachymyrmex cornetzi]	72	371	765	84	128	1219	230	280	344	291	146	326	172	89	369
CrematogasterSubCLCMeta_c40	ref|XP_011875074.1| PREDICTED: unconventional myosin-XV isoform X4 [Vollenhovia emeryi]	252	103	434	248	147	570	267	200	277	287	346	227	718	600	187
CrematogasterSubCLCMeta_c41	ref|XP_012541044.1| PREDICTED: solute carrier family 22 member 3-like [Monomorium pharaonis]	0	14	101	60	30	98	43	61	38	138	290	32	213	54	34
CrematogasterSubCLCMeta_c42	ref|XP_011708031.1| PREDICTED: protein patched [Wasmannia auropunctata]	151	75	182	179	132	182	121	133	132	73	293	48	201	179	113
CrematogasterSubCLCMeta_c43	ref|XP_011631513.1| PREDICTED: putative uncharacterized protein ART2 [Pogonomyrmex barbatus]	2	31	1	0	18	25	28	2	51	20	72	28	22	0	26
CrematogasterSubCLCMeta_c44	#N/A	86	116	35	29	18	5	5	93	8	9	29	42	13	26	51
CrematogasterSubCLCMeta_c45	ref|XP_011645525.1| PREDICTED: LOW QUALITY PROTEIN: vacuolar protein sorting-associated protein 13B [Pogonomyrmex barbatus]	40	29	54	73	44	125	79	54	104	24	71	40	54	65	57
CrematogasterSubCLCMeta_c46	ref|XP_011639090.1| PREDICTED: transmembrane protein 189 [Pogonomyrmex barbatus]	693	692	936	1012	808	711	853	940	1035	523	617	578	852	494	671
CrematogasterSubCLCMeta_c47	ref|XP_011695809.1| PREDICTED: cyclin-dependent kinase-like 4 isoform X1 [Wasmannia auropunctata]	24	60	16	41	17	91	22	5	70	0	62	53	18	25	55
CrematogasterSubCLCMeta_c48	ref|XP_015364537.1| PREDICTED: uncharacterized protein LOC107162237 isoform X1 [Diuraphis noxia]	0	0	0	0	3	18	23	0	27	0	33	8	0	0	31
CrematogasterSubCLCMeta_c49	ref|XP_018394395.1| PREDICTED: agrin-like [Cyphomyrmex costatus]	13	115	33	0	80	73	111	1	113	0	130	84	5	19	125
CrematogasterSubCLCMeta_c50	#N/A	138	0	0	43	47	18	39	33	25	0	0	15	2	113	64
CrematogasterSubCLCMeta_c51	ref|XP_011642601.1| PREDICTED: LOW QUALITY PROTEIN: uncharacterized protein LOC105430644 [Pogonomyrmex barbatus]	68	35	70	65	46	84	40	31	61	11	63	73	39	49	65
CrematogasterSubCLCMeta_c52	ref|XP_011858346.1| PREDICTED: uncharacterized protein LOC105555908, partial [Vollenhovia emeryi]	335	3	19	371	254	6	46	8	120	2558	58	9	975	7	6
CrematogasterSubCLCMeta_c53	#N/A	0	37	4	2	29	26	72	4	56	0	47	24	2	16	20
CrematogasterSubCLCMeta_c54	ref|XP_012538097.1| PREDICTED: transcription termination factor 3, mitochondrial [Monomorium pharaonis]	1111	805	1197	1548	1912	2953	1131	1058	972	1737	1320	1272	1150	1384	1112
CrematogasterSubCLCMeta_c55	ref|XP_011637340.1| PREDICTED: inositol oxygenase [Pogonomyrmex barbatus]	6710	1441	1135	2125	1821	129	2200	7198	3474	3413	746	2106	3264	723	1929
CrematogasterSubCLCMeta_c56	ref|XP_011635969.1| PREDICTED: neurotrimin isoform X3 [Pogonomyrmex barbatus]	10	0	0	6	0	0	0	0	0	25	15	0	0	0	0
CrematogasterSubCLCMeta_c57	ref|XP_011702889.1| PREDICTED: facilitated trehalose transporter Tret1-like [Wasmannia auropunctata]	3793	2831	1108	1853	2130	1230	2732	3281	1347	2372	1092	842	2207	1710	937
CrematogasterSubCLCMeta_c58	ref|XP_012540336.1| PREDICTED: glutamate receptor 1 isoform X3 [Monomorium pharaonis]	0	16	0	0	13	6	7	0	35	0	62	5	2	0	18
CrematogasterSubCLCMeta_c59	ref|XP_018316620.1| PREDICTED: uncharacterized protein LOC108731062 [Trachymyrmex zeteki]	34	46	109	212	95	0	86	69	89	72	29	75	67	139	164
CrematogasterSubCLCMeta_c60	ref|XP_011692810.1| PREDICTED: abnormal spindle-like microcephaly-associated protein homolog isoform X3 [Wasmannia auropunctata]	15	10	16	89	36	33	33	14	37	37	4	43	22	45	54
CrematogasterSubCLCMeta_c61	ref|XP_011879445.1| PREDICTED: tyrosine kinase receptor Cad96Ca [Vollenhovia emeryi]	73	24	217	49	7	81	45	15	27	51	74	67	81	61	36
CrematogasterSubCLCMeta_c62	#N/A	35	34	33	13	35	76	17	31	38	109	46	24	61	24	41
CrematogasterSubCLCMeta_c63	ref|XP_018370763.1| PREDICTED: adenosine receptor A2b-like isoform X2 [Trachymyrmex cornetzi]	42	91	36	74	109	114	173	35	217	1	174	114	57	42	110
CrematogasterSubCLCMeta_c64	ref|XP_012532891.1| PREDICTED: protein lifeguard 1-like [Monomorium pharaonis]	4171	1891	3209	4660	4116	2091	4001	3481	3637	3549	4892	2884	3276	3256	2912
CrematogasterSubCLCMeta_c65	ref|XP_011875078.1| PREDICTED: uncharacterized protein LOC105566016 [Vollenhovia emeryi]	27	91	42	12	120	131	187	11	144	62	117	109	22	25	155
CrematogasterSubCLCMeta_c66	#N/A	43	125	69	0	143	170	279	39	233	0	247	139	89	5	162
CrematogasterSubCLCMeta_c67	ref|XP_018359740.1| PREDICTED: uncharacterized protein LOC108758985 [Trachymyrmex cornetzi]	55	0	22	106	208	12	13	14	389	0	24	10	65	0	181
CrematogasterSubCLCMeta_c68	ref|XP_011688598.1| PREDICTED: DNA-dependent protein kinase catalytic subunit-like [Wasmannia auropunctata]	247	207	418	186	235	1233	389	283	329	145	416	377	366	333	409
CrematogasterSubCLCMeta_c69	ref|XP_011697327.1| PREDICTED: titin [Wasmannia auropunctata]	1467	699	1098	74	163	704	497	487	483	326	101	1190	589	1514	737
CrematogasterSubCLCMeta_c70	ref|XP_011700941.1| PREDICTED: tip elongation aberrant protein 1-like isoform X1 [Wasmannia auropunctata]	10	135	44	29	89	144	66	21	208	9	196	47	23	1	146
CrematogasterSubCLCMeta_c71	ref|XP_020285210.1| putative transcription factor SOX-15 isoform X3 [Pseudomyrmex gracilis]	3	0	51	28	0	8	0	2	13	1	21	4	2	3	40
CrematogasterSubCLCMeta_c72	#N/A	0	0	27	6	31	35	13	0	47	1	80	6	0	23	43
CrematogasterSubCLCMeta_c73	ref|XP_018342768.1| PREDICTED: leucine-rich repeat-containing protein 24-like [Trachymyrmex septentrionalis]	14	37	9	45	56	83	109	18	98	0	92	8	39	0	60
CrematogasterSubCLCMeta_c74	ref|XP_018653228.1| KRAB-A domain-containing protein [Schistosoma mansoni]	246	212	52	65	6302	45	53	150	147	27	413	126	288	341	267
CrematogasterSubCLCMeta_c75	ref|XP_011640848.1| PREDICTED: putative gustatory receptor 28a isoform X1 [Pogonomyrmex barbatus]	6	49	79	0	11	423	0	19	89	0	40	103	25	62	183
CrematogasterSubCLCMeta_c76	ref|XP_011692024.1| PREDICTED: dopamine receptor 2 isoform X2 [Wasmannia auropunctata]	8	30	5	22	62	73	87	0	102	0	59	20	27	0	23
CrematogasterSubCLCMeta_c77	ref|XP_015111778.1| PREDICTED: uncharacterized protein LOC107037646 [Diachasma alloeum]	0	712	1353	488	63	69	0	269	277	175	227	61	315	472	32
CrematogasterSubCLCMeta_c78	ref|XP_018053389.1| PREDICTED: uridine-cytidine kinase-like 1 isoform X1 [Atta colombica]	16	265	207	0	53	1149	65	7	11	0	157	225	20	334	75
CrematogasterSubCLCMeta_c79	#N/A	0	0	0	51	0	20	10	4	25	0	8	11	11	12	10
CrematogasterSubCLCMeta_c80	ref|XP_011685788.1| PREDICTED: LOW QUALITY PROTEIN: E3 ubiquitin-protein ligase Su(dx) [Wasmannia auropunctata]	604	523	2768	713	604	748	698	732	881	277	883	3377	561	3201	3700
CrematogasterSubCLCMeta_c81	ref|XP_011698713.1| PREDICTED: uncharacterized protein LOC105456415 [Wasmannia auropunctata]	29	91	231	29	26	1	37	17	44	24	65	17	67	42	140
CrematogasterSubCLCMeta_c82	#N/A	18	50	48	22	26	10	26	8	33	0	18	38	37	10	32
CrematogasterSubCLCMeta_c83	ref|XP_016967404.1| PREDICTED: glutamate receptor ionotropic, kainate 2 isoform X8 [Drosophila biarmipes]	0	19	0	0	27	40	6	0	22	0	32	21	0	0	24
CrematogasterSubCLCMeta_c84	ref|XP_020283056.1| abnormal cell migration protein 10-like isoform X2 [Pseudomyrmex gracilis]	21	5	3	36	33	38	9	16	23	4	4	31	22	7	82
CrematogasterSubCLCMeta_c85	ref|XP_018394758.1| PREDICTED: cytochrome P450 4C1-like [Cyphomyrmex costatus]	4	25	2	0	0	216	6	6	1	0	57	0	5	0	0
CrematogasterSubCLCMeta_c86	ref|XP_017784166.1| PREDICTED: dystonin isoform X36 [Nicrophorus vespilloides]	0	28	0	0	7	70	17	2	24	0	23	21	1	0	26
CrematogasterSubCLCMeta_c87	ref|XP_018355434.1| PREDICTED: uncharacterized protein LOC108756268 isoform X2 [Trachymyrmex septentrionalis]	29	226	22	36	389	176	454	131	473	34	342	113	105	45	151
CrematogasterSubCLCMeta_c88	ref|XP_022203449.1| LOW QUALITY PROTEIN: glutamate receptor ionotropic, kainate 2-like, partial [Nilaparvata lugens]	0	8	9	5	0	0	18	0	2	0	19	13	8	0	0
CrematogasterSubCLCMeta_c89	ref|XP_011631138.1| PREDICTED: broad-complex core protein isoforms 1/2/3/4/5 isoform X4 [Pogonomyrmex barbatus]	6	75	0	30	104	139	128	6	122	57	112	58	31	0	119
CrematogasterSubCLCMeta_c90	ref|XP_011176231.1| PREDICTED: low-density lipoprotein receptor-related protein 6 isoform X2 [Solenopsis invicta]	861	534	586	706	705	474	793	755	780	426	456	284	813	426	725
CrematogasterSubCLCMeta_c91	ref|XP_012143883.1| PREDICTED: uncharacterized protein LOC105662864 [Megachile rotundata]	6	0	1	45	187	0	30	6	9	0	7	0	123	0	4
CrematogasterSubCLCMeta_c92	ref|XP_018402329.1| PREDICTED: uncharacterized protein LOC108779404 [Cyphomyrmex costatus]	278	383	893	909	818	376	548	184	420	747	1635	819	645	781	897
CrematogasterSubCLCMeta_c93	ref|XP_018370030.1| PREDICTED: zinc finger protein 672-like, partial [Trachymyrmex cornetzi]	0	2	3	29	19	21	11	10	8	0	8	17	22	9	19
CrematogasterSubCLCMeta_c95	ref|XP_011862556.1| PREDICTED: zinc finger protein 239-like [Vollenhovia emeryi]	0	7	46	0	22	1	13	5	13	0	47	6	12	4	11
CrematogasterSubCLCMeta_c97	ref|XP_018404767.1| PREDICTED: uncharacterized protein LOC108781327 [Cyphomyrmex costatus]	4	14	0	12	21	38	22	2	12	0	14	0	4	0	26
CrematogasterSubCLCMeta_c98	ref|XP_011158616.1| PREDICTED: galectin-4-like isoform X3 [Solenopsis invicta]	37	4	0	102	28	0	0	52	37	75	138	0	34	0	16
CrematogasterSubCLCMeta_c99	ref|XP_011065063.1| PREDICTED: LOW QUALITY PROTEIN: brain tumor protein-like [Acromyrmex echinatior]	3	15	22	29	11	103	29	5	35	3	127	21	79	36	30
CrematogasterSubCLCMeta_c100	ref|XP_001964696.2| uncharacterized protein Dana_GF23323 [Drosophila ananassae]	31	1	14	15	41	16	5	11	29	81	0	18	12	29	25
CrematogasterSubCLCMeta_c101	ref|XP_018375900.1| PREDICTED: uncharacterized protein LOC108769422 isoform X2 [Trachymyrmex cornetzi]	6	328	39	49	241	401	402	16	380	37	402	133	50	55	279
CrematogasterSubCLCMeta_c102	ref|XP_013077889.1| PREDICTED: protein dispatched homolog 1-like [Biomphalaria glabrata]	0	35	0	0	72	71	84	3	76	0	29	30	5	0	53
CrematogasterSubCLCMeta_c103	ref|XP_011690956.1| PREDICTED: homeobox protein orthopedia [Wasmannia auropunctata]	0	2	0	0	14	20	6	0	15	1	39	12	68	0	15
CrematogasterSubCLCMeta_c104	ref|XP_012537580.1| PREDICTED: discoidin domain-containing receptor 2-like [Monomorium pharaonis]	37	64	30	38	74	104	69	22	110	0	93	66	145	33	113
CrematogasterSubCLCMeta_c105	ref|XP_011699412.1| PREDICTED: lipase 3-like [Wasmannia auropunctata]	41	0	14	13	177	0	18	15	10	20	0	39	149	18	7
CrematogasterSubCLCMeta_c106	ref|XP_011875073.1| PREDICTED: unconventional myosin-XV isoform X3 [Vollenhovia emeryi]	5	0	20	0	23	0	0	3	0	0	0	10	0	22	0
CrematogasterSubCLCMeta_c107	ref|XP_011061623.1| PREDICTED: zinc finger protein rotund-like isoform X1 [Acromyrmex echinatior]	44	50	8	55	63	185	68	36	50	0	39	10	113	60	69
CrematogasterSubCLCMeta_c108	ref|XP_018306364.1| PREDICTED: uncharacterized protein LOC108724469 isoform X1 [Trachymyrmex zeteki]	6	344	0	22	363	301	453	21	438	0	208	283	21	0	334
CrematogasterSubCLCMeta_c109	ref|XP_011698138.1| PREDICTED: LOW QUALITY PROTEIN: histone acetyltransferase KAT7 [Wasmannia auropunctata]	272	163	269	156	174	260	192	110	165	190	333	131	190	187	239
CrematogasterSubCLCMeta_c110	ref|XP_011869308.1| PREDICTED: WD repeat-containing protein 78-like [Vollenhovia emeryi]	18	24	4	9	34	5	63	12	56	0	58	33	17	0	37
CrematogasterSubCLCMeta_c111	ref|XP_018406314.1| PREDICTED: regulating synaptic membrane exocytosis protein 2 [Cyphomyrmex costatus]	11	299	1	22	217	231	229	14	363	0	286	66	5	38	410
CrematogasterSubCLCMeta_c112	ref|XP_016843183.1| PREDICTED: uncharacterized protein LOC100117878 [Nasonia vitripennis]	8	7	15	535	528	77	41	3	39	3	29	1737	20	1670	2171
CrematogasterSubCLCMeta_c113	ref|XP_011167769.1| PREDICTED: CUGBP Elav-like family member 4 isoform X2 [Solenopsis invicta]	10	69	0	0	3	212	72	9	0	0	8	18	6	0	68
CrematogasterSubCLCMeta_c114	ref|XP_018312440.1| PREDICTED: uncharacterized protein LOC108728408 [Trachymyrmex zeteki]	136	166	156	129	149	162	116	98	169	76	209	124	195	140	184
CrematogasterSubCLCMeta_c115	ref|XP_018404733.1| PREDICTED: alpha-2B adrenergic receptor [Cyphomyrmex costatus]	0	51	0	26	35	67	20	17	54	24	34	5	24	38	37
CrematogasterSubCLCMeta_c116	ref|XP_012541192.1| PREDICTED: WD repeat-containing protein 7 isoform X12 [Monomorium pharaonis]	71	102	114	98	93	330	139	171	319	291	168	229	131	110	173
CrematogasterSubCLCMeta_c117	#N/A	11	0	0	3	16	32	0	0	2	24	0	0	4	9	5
CrematogasterSubCLCMeta_c118	ref|XP_011878059.1| PREDICTED: uncharacterized protein LOC105567640 isoform X1 [Vollenhovia emeryi]	155	90	548	333	73	182	144	152	249	25	644	214	381	379	241
CrematogasterSubCLCMeta_c119	ref|XP_011162672.1| PREDICTED: leucine-rich repeat-containing protein 24 [Solenopsis invicta]	0	174	0	5	127	68	124	2	147	0	76	58	0	2	154
CrematogasterSubCLCMeta_c120	ref|XP_022243126.1| mitogen-activated protein kinase kinase kinase 1-like [Limulus polyphemus]	11	5	54	9	19	44	16	4	8	0	24	0	9	6	20
CrematogasterSubCLCMeta_c121	ref|XP_021362076.1| uncharacterized protein LOC110455937 [Mizuhopecten yessoensis]	25	25	33	7	1	0	4	2	14	0	12	27	6	21	39
CrematogasterSubCLCMeta_c122	ref|XP_011631815.1| PREDICTED: uncharacterized protein LOC105423669 [Pogonomyrmex barbatus]	897	596	362	712	872	458	800	1274	827	646	462	862	1230	810	597
CrematogasterSubCLCMeta_c123	ref|XP_012521907.1| PREDICTED: pancreatic lipase-related protein 2-like [Monomorium pharaonis]	635	5531	2930	2337	1612	4341	1718	1837	1552	2398	353	5279	1005	11027	8260
CrematogasterSubCLCMeta_c125	ref|XP_022084546.1| uncharacterized protein LOC110975965 [Acanthaster planci]	0	11	0	12	0	16	4	11	17	0	21	17	6	97	74
CrematogasterSubCLCMeta_c126	ref|XP_018054007.1| PREDICTED: rabphilin-3A [Atta colombica]	13	33	47	19	169	113	162	39	83	0	66	103	57	34	95
CrematogasterSubCLCMeta_c127	ref|XP_012231534.1| PREDICTED: disks large 1 tumor suppressor protein isoform X9 [Linepithema humile]	117	109	311	352	41	85	128	77	111	166	10	39	53	477	169
CrematogasterSubCLCMeta_c128	ref|XP_011875642.1| PREDICTED: uncharacterized protein LOC105566337 [Vollenhovia emeryi]	0	44	0	0	40	55	83	0	118	0	150	44	12	0	68
CrematogasterSubCLCMeta_c129	#N/A	0	17	11	14	49	47	64	0	57	0	25	19	6	1	36
CrematogasterSubCLCMeta_c130	ref|XP_018574462.1| PREDICTED: uncharacterized protein LOC108913397 [Anoplophora glabripennis]	52	0	0	34	97	10	13	11	9	0	18	0	11	50	14
CrematogasterSubCLCMeta_c131	ref|XP_018049170.1| PREDICTED: histone acetyltransferase KAT2A-like [Atta colombica]	92	139	45	76	119	300	215	73	159	217	115	113	138	97	153
CrematogasterSubCLCMeta_c132	ref|XP_015108309.1| PREDICTED: DNA-directed RNA polymerase III subunit RPC10 [Diachasma alloeum]	21	29	0	35	29	0	38	6	43	5	8	50	14	0	18
CrematogasterSubCLCMeta_c133	ref|XP_012539905.1| PREDICTED: PR domain zinc finger protein 1 isoform X2 [Monomorium pharaonis]	6	105	61	11	99	174	178	9	202	15	146	63	11	22	107
CrematogasterSubCLCMeta_c134	ref|XP_011175062.1| PREDICTED: uncharacterized protein LOC105207332 [Solenopsis invicta]	0	8	0	48	1	0	10	7	10	77	12	5	9	0	5
CrematogasterSubCLCMeta_c135	#N/A	6	15	21	0	27	6	10	5	6	24	17	15	20	55	15
CrematogasterSubCLCMeta_c136	#N/A	13	11	25	50	1	50	21	23	12	20	0	11	35	20	28
CrematogasterSubCLCMeta_c137	#N/A	31	42	86	3	48	53	29	12	21	44	63	40	31	25	98
CrematogasterSubCLCMeta_c138	ref|XP_011644207.1| PREDICTED: suppressor of lurcher protein 1 isoform X1 [Pogonomyrmex barbatus]	4	128	7	42	44	124	80	26	107	101	203	62	64	9	142
CrematogasterSubCLCMeta_c139	ref|XP_011686669.1| PREDICTED: epidermal growth factor receptor kinase substrate 8-like isoform X1 [Wasmannia auropunctata]	29	233	207	118	0	615	0	45	97	103	3	222	443	213	188
CrematogasterSubCLCMeta_c140	ref|XP_011859339.1| PREDICTED: uncharacterized protein LOC105556836 [Vollenhovia emeryi]	48	76	10	185	151	4	31	123	87	106	165	36	46	35	4
CrematogasterSubCLCMeta_c141	ref|XP_011703021.1| PREDICTED: neo-calmodulin-like isoform X2 [Wasmannia auropunctata]	0	77	186	29	32	524	79	21	162	0	121	77	12	43	152
CrematogasterSubCLCMeta_c142	ref|XP_011642388.1| PREDICTED: solute carrier family 22 member 5-like isoform X2 [Pogonomyrmex barbatus]	28	19	12	32	46	24	21	21	53	20	3	31	48	0	39
CrematogasterSubCLCMeta_c143	ref|XP_012530140.1| PREDICTED: uncharacterized protein LOC105833168 [Monomorium pharaonis]	0	30	1	0	45	99	63	1	76	0	42	11	0	0	58
CrematogasterSubCLCMeta_c144	ref|XP_018317306.1| PREDICTED: uncharacterized protein LOC108731457 isoform X2 [Trachymyrmex zeteki]	0	7	16	0	19	26	0	0	24	0	11	9	10	0	5
CrematogasterSubCLCMeta_c145	#N/A	1	316	44	0	317	348	399	2	455	0	448	351	5	11	262
CrematogasterSubCLCMeta_c146	ref|XP_011870284.1| PREDICTED: serine proteinase stubble [Vollenhovia emeryi]	15	15	13	17	10	22	10	41	30	24	32	16	244	17	21
CrematogasterSubCLCMeta_c147	ref|XP_018305871.1| PREDICTED: neurotrimin [Trachymyrmex zeteki]	26	867	6	49	801	502	1052	40	809	48	961	551	88	6	900
CrematogasterSubCLCMeta_c148	#N/A	0	12	5	8	9	23	32	5	15	0	0	17	22	8	17
CrematogasterSubCLCMeta_c149	ref|XP_018404767.1| PREDICTED: uncharacterized protein LOC108781327 [Cyphomyrmex costatus]	0	0	0	13	17	47	54	4	41	0	53	1	0	12	21
CrematogasterSubCLCMeta_c150	ref|XP_011257756.1| PREDICTED: poly(U)-specific endoribonuclease homolog [Camponotus floridanus]	0	0	31	33	37	29	58	40	18	21	29	25	14	30	26
CrematogasterSubCLCMeta_c151	ref|XP_011877771.1| PREDICTED: villin-1 [Vollenhovia emeryi]	23	22	0	27	7	28	5	4	21	0	0	33	5	28	29
CrematogasterSubCLCMeta_c152	ref|XP_018377449.1| PREDICTED: uncharacterized protein LOC108770381, partial [Trachymyrmex cornetzi]	60	0	48	274	74	5	12	55	53	31	39	16	58	81	120
CrematogasterSubCLCMeta_c153	ref|XP_011876266.1| PREDICTED: uncharacterized protein LOC105566677 [Vollenhovia emeryi]	79	97	62	63	83	104	41	43	164	24	611	74	124	96	129
CrematogasterSubCLCMeta_c154	ref|XP_018376374.1| PREDICTED: uncharacterized protein LOC108769730 [Trachymyrmex cornetzi]	35	101	0	29	46	0	91	62	34	70	54	38	96	41	217
CrematogasterSubCLCMeta_c155	ref|XP_011163522.1| PREDICTED: maternal embryonic leucine zipper kinase-like isoform X2 [Solenopsis invicta]	55	13	0	16	26	31	15	12	5	0	11	0	84	34	12
CrematogasterSubCLCMeta_c156	ref|XP_018401814.1| PREDICTED: kinesin-like protein CG14535 [Cyphomyrmex costatus]	17	140	57	26	68	155	138	9	138	8	113	50	75	7	137
CrematogasterSubCLCMeta_c157	ref|XP_011881292.1| PREDICTED: LOW QUALITY PROTEIN: D-3-phosphoglycerate dehydrogenase [Vollenhovia emeryi]	183	3276	560	120	179	1213	213	8828	521	67	312	1651	483	140	746
CrematogasterSubCLCMeta_c158	ref|XP_011862688.1| PREDICTED: uncharacterized protein LOC105559191 isoform X2 [Vollenhovia emeryi]	199	14	1	70	85	62	106	100	245	113	730	43	23	116	48
CrematogasterSubCLCMeta_c159	#N/A	34	44	29	31	81	26	26	32	47	18	18	55	27	5	40
CrematogasterSubCLCMeta_c160	ref|XP_018315226.1| PREDICTED: Y-box factor homolog isoform X3 [Trachymyrmex zeteki]	207	152	135	280	129	115	50	103	136	82	132	90	487	65	138
CrematogasterSubCLCMeta_c161	ref|XP_022165456.1| uncharacterized protein LOC111030330 [Myzus persicae]	126	120	76	76	69	48	64	74	171	94	59	44	79	86	217
CrematogasterSubCLCMeta_c163	ref|XP_020716164.1| uncharacterized protein LOC101453534, partial [Ceratitis capitata]	20	0	0	35	32	0	17	39	23	57	44	0	32	0	0
CrematogasterSubCLCMeta_c164	ref|XP_011702454.1| PREDICTED: sushi, von Willebrand factor type A, EGF and pentraxin domain-containing protein 1 [Wasmannia auropunctata]	35	51	84	77	22	115	32	26	41	0	27	64	84	178	53
CrematogasterSubCLCMeta_c165	ref|XP_012218929.1| PREDICTED: POU domain, class 6, transcription factor 2 isoform X2 [Linepithema humile]	22	109	63	4	46	230	126	28	150	0	212	30	99	2	81
CrematogasterSubCLCMeta_c166	ref|XP_011348825.2| PREDICTED: POU domain, class 6, transcription factor 1 isoform X2 [Ooceraea biroi]	0	27	44	1	47	0	10	13	13	33	9	35	38	35	12
CrematogasterSubCLCMeta_c167	ref|XP_018375123.1| PREDICTED: interference hedgehog-like isoform X3 [Trachymyrmex cornetzi]	162	68	118	65	55	176	41	76	62	15	92	142	732	88	81
CrematogasterSubCLCMeta_c168	ref|XP_011864104.1| PREDICTED: proton-coupled amino acid transporter 1-like isoform X1 [Vollenhovia emeryi]	124	113	135	199	290	147	270	188	491	755	337	119	274	159	151
CrematogasterSubCLCMeta_c169	#N/A	15	36	87	21	64	80	90	51	81	34	41	44	65	10	42
CrematogasterSubCLCMeta_c170	ref|NP_001291525.1| vitellogenin receptor precursor [Solenopsis invicta]	492	4	1	2	14	567	0	1	3	35	38	43	3137	3	2
CrematogasterSubCLCMeta_c171	ref|XP_019697737.1| PREDICTED: uncharacterized protein LOC105184963 [Harpegnathos saltator]	73	21	0	14	22	2	19	9	16	0	46	25	17	8	57
CrematogasterSubCLCMeta_c172	#N/A	3	6	0	13	16	23	23	5	6	30	5	17	32	20	14
CrematogasterSubCLCMeta_c173	ref|XP_011698045.1| PREDICTED: enhancer of split mgamma protein-like [Wasmannia auropunctata]	6	0	0	0	0	14	0	0	2	0	0	5	10	0	2
CrematogasterSubCLCMeta_c174	ref|XP_018395441.1| PREDICTED: uncharacterized protein LOC108773950 isoform X2 [Cyphomyrmex costatus]	34	24	198	28	26	179	67	57	77	23	84	47	90	9	55
CrematogasterSubCLCMeta_c175	ref|XP_018364381.1| PREDICTED: uncharacterized protein LOC108762073 [Trachymyrmex cornetzi]	0	27	0	0	29	59	66	0	43	0	40	30	0	0	20
CrematogasterSubCLCMeta_c176	ref|XP_018358232.1| PREDICTED: LOW QUALITY PROTEIN: uncharacterized protein LOC108758021 [Trachymyrmex cornetzi]	26	95	25	118	187	355	368	32	306	76	262	141	92	50	326
CrematogasterSubCLCMeta_c177	ref|XP_003376808.1| retrovirus-related Pol polyprotein from transposon TNT 1-94 [Trichinella spiralis]	200	19	68	303	157	76	137	30	18	78	12	81	360	162	85
CrematogasterSubCLCMeta_c178	ref|XP_011869242.1| PREDICTED: uncharacterized protein LOC105562784 [Vollenhovia emeryi]	128	68	12	0	176	427	69	109	68	69	70	36	68	0	52
CrematogasterSubCLCMeta_c179	ref|XP_018044572.1| PREDICTED: RNA binding protein fox-1 homolog 2-like [Atta colombica]	2058	4159	3362	2759	3553	5509	3941	2697	3888	2882	6334	4581	2895	3598	5488
CrematogasterSubCLCMeta_c180	ref|XP_011691210.1| PREDICTED: breast cancer type 2 susceptibility protein-like isoform X1 [Wasmannia auropunctata]	31	30	10	37	46	538	13	16	35	0	4	51	69	2	15
CrematogasterSubCLCMeta_c181	ref|XP_011629943.1| PREDICTED: synaptosomal-associated protein 25 isoform X2 [Pogonomyrmex barbatus]	40	79	19	15	54	33	69	36	80	0	56	12	42	0	76
CrematogasterSubCLCMeta_c182	ref|XP_011157663.1| PREDICTED: JNK-interacting protein 1 isoform X1 [Solenopsis invicta]	29	395	49	63	419	181	584	21	482	2	606	344	37	40	391
CrematogasterSubCLCMeta_c183	ref|XP_011162218.1| PREDICTED: ubiquitin carboxyl-terminal hydrolase 1 [Solenopsis invicta]	196	22	188	34	184	87	177	75	69	180	252	31	100	26	11
CrematogasterSubCLCMeta_c184	ref|XP_011643551.1| PREDICTED: DNA-directed RNA polymerases I, II, and III subunit RPABC2 [Pogonomyrmex barbatus]	1233	883	1171	1411	1181	1071	1065	1146	1180	1222	836	1693	1295	978	1359
CrematogasterSubCLCMeta_c185	ref|XP_008205887.1| PREDICTED: uncharacterized protein LOC103316061 [Nasonia vitripennis]	30	228	72	44	103	37	79	34	60	27	79	177	78	159	218
CrematogasterSubCLCMeta_c186	ref|XP_018299709.1| PREDICTED: uncharacterized protein LOC108720294 [Trachymyrmex zeteki]	1378	2901	3463	1636	2371	2978	1156	2792	2291	2884	2773	3390	1940	5075	4396
CrematogasterSubCLCMeta_c187	ref|XP_011253495.1| PREDICTED: plancitoxin-1 [Camponotus floridanus]	43	89	39	24	27	47	91	63	72	28	172	31	85	22	72
CrematogasterSubCLCMeta_c188	ref|XP_012226155.1| PREDICTED: forkhead box protein D1-like isoform X3 [Linepithema humile]	1137	1521	1603	1204	1073	1371	1163	1616	1572	735	1600	899	1117	1069	1138
CrematogasterSubCLCMeta_c189	ref|XP_018058309.1| PREDICTED: chromodomain-helicase-DNA-binding protein Mi-2 homolog isoform X6 [Atta colombica]	276	1233	879	44	863	983	635	438	391	536	1957	1313	208	613	730
CrematogasterSubCLCMeta_s190	ref|XP_008216297.1| PREDICTED: GMP synthase [glutamine-hydrolyzing] [Nasonia vitripennis]	4	0	6	0	0	8	0	0	0	0	0	0	0	0	0
CrematogasterSubCLCMeta_c191	#N/A	0	0	9	0	0	14	16	12	10	0	14	3	30	0	10
CrematogasterSubCLCMeta_c193	ref|XP_011872922.1| PREDICTED: major facilitator superfamily domain-containing protein 6-B [Vollenhovia emeryi]	72	88	211	62	34	61	26	16	22	1	462	48	185	21	71
CrematogasterSubCLCMeta_c194	ref|XP_011171309.1| PREDICTED: filamin-A [Solenopsis invicta]	57	603	1193	102	90	1222	102	103	3	0	309	736	294	1265	1007
CrematogasterSubCLCMeta_c195	ref|XP_018049231.1| PREDICTED: gamma-aminobutyric acid type B receptor subunit 2 isoform X1 [Atta colombica]	37	285	120	229	397	440	568	92	461	85	757	300	127	105	484
CrematogasterSubCLCMeta_c196	ref|XP_011878959.1| PREDICTED: glutamate receptor ionotropic, kainate 1 isoform X3 [Vollenhovia emeryi]	13	11	8	0	62	85	75	1	84	0	79	56	17	74	39
CrematogasterSubCLCMeta_c197	ref|XP_011175990.1| PREDICTED: uncharacterized protein LOC105207981 isoform X1 [Solenopsis invicta]	83	175	300	215	219	226	161	254	284	182	175	171	2187	273	303
CrematogasterSubCLCMeta_c198	ref|XP_011642389.1| PREDICTED: solute carrier family 22 member 5-like isoform X3 [Pogonomyrmex barbatus]	0	5	0	16	7	66	16	16	4	0	0	0	13	8	2
CrematogasterSubCLCMeta_c199	ref|XP_012534014.1| PREDICTED: cytoplasmic aconitate hydratase-like isoform X2 [Monomorium pharaonis]	1481	2064	3244	406	1486	3002	2042	582	2424	2188	1240	399	2011	2041	2424
CrematogasterSubCLCMeta_c200	ref|XP_011160801.1| PREDICTED: MOXD1 homolog 1 [Solenopsis invicta]	16	58	68	7	23	56	9	14	18	0	34	25	6	70	28
CrematogasterSubCLCMeta_c201	ref|XP_011638455.1| PREDICTED: protein enhancer of sevenless 2B [Pogonomyrmex barbatus]	1136	684	991	1144	1292	1099	1131	977	941	1023	747	991	1140	816	860
CrematogasterSubCLCMeta_c202	ref|XP_011160594.1| PREDICTED: dnaJ homolog subfamily C member 3 [Solenopsis invicta]	2187	945	1743	1919	1600	1582	4155	1853	1755	1647	2835	1501	2564	1930	2125
CrematogasterSubCLCMeta_c203	#N/A	0	0	0	0	0	13	3	5	1	0	13	0	2	0	1
CrematogasterSubCLCMeta_c204	ref|XP_011062537.1| PREDICTED: MOXD1 homolog 2 [Acromyrmex echinatior]	0	28	32	30	50	39	19	8	72	0	66	27	21	48	71
CrematogasterSubCLCMeta_c205	ref|XP_011061194.1| PREDICTED: uncharacterized protein LOC105150071 [Acromyrmex echinatior]	0	3	19	1	71	958	31	7	28	1	80	32	46	1	21
CrematogasterSubCLCMeta_c206	ref|XP_011879814.1| PREDICTED: uncharacterized protein LOC105568617 [Vollenhovia emeryi]	293	185	206	345	387	205	156	332	348	474	544	234	428	368	178
CrematogasterSubCLCMeta_c207	ref|XP_011699512.1| PREDICTED: uncharacterized protein LOC105456866 [Wasmannia auropunctata]	4	0	0	0	9	7	16	3	4	0	32	6	12	0	14
CrematogasterSubCLCMeta_c208	ref|XP_018369741.1| PREDICTED: uncharacterized protein LOC108765484 [Trachymyrmex cornetzi]	10	0	65	23	9	0	26	10	25	0	19	26	17	44	22
CrematogasterSubCLCMeta_c209	ref|XP_011699801.1| PREDICTED: LOW QUALITY PROTEIN: uncharacterized protein LOC105457063 [Wasmannia auropunctata]	47	8	8	0	13	10	3	8	5	26	32	10	5	0	18
CrematogasterSubCLCMeta_c210	#N/A	36	7	5	17	27	57	17	47	38	0	30	3	60	25	37
CrematogasterSubCLCMeta_c211	ref|XP_011874201.1| PREDICTED: fibroblast growth factor receptor homolog 1-like isoform X1 [Vollenhovia emeryi]	0	80	389	11	0	299	0	0	0	0	0	278	21	610	137
CrematogasterSubCLCMeta_c212	#N/A	40	0	38	168	15	20	13	18	21	0	14	14	62	99	25
CrematogasterSubCLCMeta_c213	ref|XP_011170024.1| PREDICTED: DNA repair and recombination protein RAD54-like [Solenopsis invicta]	78	30	88	96	118	88	89	69	91	62	75	128	118	29	124
CrematogasterSubCLCMeta_c214	ref|XP_011873500.1| PREDICTED: lactosylceramide 4-alpha-galactosyltransferase-like [Vollenhovia emeryi]	229	276	273	280	301	570	279	410	454	430	283	361	348	195	1022
CrematogasterSubCLCMeta_c215	ref|XP_011310280.1| PREDICTED: serine/arginine-rich splicing factor 2 isoform X1 [Fopius arisanus]	1392	1013	1896	1748	1426	1422	1562	1243	1624	1285	1578	1242	1368	1333	1489
CrematogasterSubCLCMeta_c216	#N/A	55	33	20	33	16	4	38	13	32	0	14	15	28	3	2
CrematogasterSubCLCMeta_c217	ref|XP_011686071.1| PREDICTED: probable RISC-loading complex subunit BRAFLDRAFT_242885 isoform X2 [Wasmannia auropunctata]	49	51	175	59	142	361	136	135	206	168	187	105	176	92	163
CrematogasterSubCLCMeta_c218	ref|XP_011882798.1| PREDICTED: uncharacterized protein LOC105570305 isoform X2 [Vollenhovia emeryi]	9	1	27	0	42	3	31	9	25	0	32	33	36	2	8
CrematogasterSubCLCMeta_c219	ref|XP_001120123.3| PREDICTED: netrin-1-like, partial [Apis mellifera]	12	65	18	0	65	125	49	25	113	7	178	31	27	23	42
CrematogasterSubCLCMeta_c220	ref|XP_018342502.1| PREDICTED: proto-oncogene tyrosine-protein kinase receptor Ret [Trachymyrmex septentrionalis]	138	158	588	260	206	1979	138	106	113	115	166	284	401	114	259
CrematogasterSubCLCMeta_c221	ref|XP_018406467.1| PREDICTED: uncharacterized protein LOC108782651 [Cyphomyrmex costatus]	0	13	16	24	11	9	12	0	10	0	12	2	5	0	1
CrematogasterSubCLCMeta_c222	ref|XP_011875850.1| PREDICTED: neurofibromin isoform X3 [Vollenhovia emeryi]	264	457	320	165	427	378	358	200	610	75	709	294	421	370	390
CrematogasterSubCLCMeta_c223	ref|XP_018361850.1| PREDICTED: m7GpppX diphosphatase [Trachymyrmex cornetzi]	362	300	818	749	472	199	559	447	501	389	358	506	516	450	369
CrematogasterSubCLCMeta_c224	ref|XP_011642267.1| PREDICTED: LOW QUALITY PROTEIN: kinesin-associated protein 3 [Pogonomyrmex barbatus]	281	222	249	315	388	533	289	247	289	201	668	342	325	222	409
CrematogasterSubCLCMeta_c225	ref|XP_012538819.1| PREDICTED: eukaryotic translation initiation factor 4 gamma [Monomorium pharaonis]	0	222	11	7	214	380	371	13	332	48	368	185	32	1	343
CrematogasterSubCLCMeta_c226	ref|XP_011878425.1| PREDICTED: cytochrome P450 4C1-like [Vollenhovia emeryi]	90	315	35	122	116	64	56	56	299	22	17	364	99	667	178
CrematogasterSubCLCMeta_c227	ref|XP_019883141.1| PREDICTED: mucin-5AC isoform X7 [Camponotus floridanus]	61	13	36	4	34	30	47	3	24	0	991	23	55	35	20
CrematogasterSubCLCMeta_c228	#N/A	25	24	57	106	17	34	13	28	49	35	111	23	75	39	77
CrematogasterSubCLCMeta_c229	ref|XP_018366473.1| PREDICTED: rho guanine nucleotide exchange factor 10-like protein isoform X2 [Trachymyrmex cornetzi]	622	1635	2517	1421	1666	3055	1011	1122	1660	1630	2471	2040	2346	2446	2147
CrematogasterSubCLCMeta_c230	ref|XP_015029645.1| uncharacterized protein Dvir_GJ21316, isoform N [Drosophila virilis]	0	2	0	11	8	7	17	1	13	0	0	0	9	0	14
CrematogasterSubCLCMeta_c231	ref|XP_011873298.1| PREDICTED: slit homolog 2 protein isoform X1 [Vollenhovia emeryi]	0	13	10	0	5	4	0	5	10	22	42	5	47	3	15
CrematogasterSubCLCMeta_c232	ref|XP_011858169.1| PREDICTED: uncharacterized protein LOC105555737 [Vollenhovia emeryi]	0	4	0	9	7	0	23	0	28	48	57	9	18	0	17
CrematogasterSubCLCMeta_c233	#N/A	14	28	5	15	22	59	13	43	31	0	26	0	42	5	51
CrematogasterSubCLCMeta_c234	ref|XP_011697054.1| PREDICTED: uncharacterized protein LOC105455435 [Wasmannia auropunctata]	0	38	15	13	8	28	26	16	26	8	12	21	6	19	27
CrematogasterSubCLCMeta_c235	ref|XP_018369496.1| PREDICTED: UDP-glucuronosyltransferase 2C1 [Trachymyrmex cornetzi]	39	55	0	119	22	37	0	28	9	1	344	29	621	265	38
CrematogasterSubCLCMeta_c236	ref|XP_011173683.1| PREDICTED: uncharacterized protein LOC105205848 [Solenopsis invicta]	8	103	42	21	17	61	16	8	13	0	24	31	54	4	64
CrematogasterSubCLCMeta_c237	ref|XP_018651542.1| hypothetical protein Smp_100070 [Schistosoma mansoni]	4	2	1	17	13	63	10	6	4	0	21	0	3	0	14
CrematogasterSubCLCMeta_c238	ref|XP_018355073.1| PREDICTED: uncharacterized protein LOC108756029 [Trachymyrmex septentrionalis]	51	73	5	26	42	1	22	57	25	0	4	12	31	13	40
CrematogasterSubCLCMeta_c239	ref|XP_011703243.1| PREDICTED: slit homolog 3 protein [Wasmannia auropunctata]	10	48	1	20	28	43	54	1	69	1	71	11	25	5	64
CrematogasterSubCLCMeta_c240	ref|XP_012527324.1| PREDICTED: graves disease carrier protein homolog isoform X2 [Monomorium pharaonis]	0	31	32	0	20	158	8	4	19	0	4	49	50	26	14
CrematogasterSubCLCMeta_c241	#N/A	50	50	98	38	34	8	43	47	171	32	3	30	72	18	91
CrematogasterSubCLCMeta_c242	ref|XP_018377266.1| PREDICTED: uncharacterized protein LOC108770270 [Trachymyrmex cornetzi]	14	0	0	59	19	3	0	2	2	0	4	0	10	15	7
CrematogasterSubCLCMeta_c243	ref|XP_012541200.1| PREDICTED: UNC93-like protein [Monomorium pharaonis]	385	48	68	286	330	184	75	97	139	134	173	84	1606	170	118
CrematogasterSubCLCMeta_c244	ref|XP_018375120.1| PREDICTED: rho GTPase-activating protein 100F [Trachymyrmex cornetzi]	4	187	0	10	198	276	248	13	348	0	321	81	6	25	369
CrematogasterSubCLCMeta_c245	ref|XP_018373646.1| PREDICTED: protein turtle-like isoform X3 [Trachymyrmex cornetzi]	111	612	402	366	993	1003	1511	201	1226	120	1340	195	193	17	596
CrematogasterSubCLCMeta_c246	ref|XP_011064696.1| PREDICTED: synaptosomal-associated protein 25 [Acromyrmex echinatior]	576	1541	263	389	1305	1027	1737	332	2075	264	1712	1319	307	520	1923
CrematogasterSubCLCMeta_c247	#N/A	26	13	23	25	21	23	26	12	18	0	19	32	28	35	6
CrematogasterSubCLCMeta_c248	ref|XP_018356836.1| PREDICTED: dual oxidase isoform X2 [Trachymyrmex septentrionalis]	77	6	62	18	10	4	0	5	6	0	18	23	12	2	3
CrematogasterSubCLCMeta_c249	ref|XP_020289393.1| restin homolog isoform X4 [Pseudomyrmex gracilis]	14	24	26	34	28	8	35	11	19	61	41	6	37	21	34
CrematogasterSubCLCMeta_c250	ref|XP_011874342.1| PREDICTED: R3H domain-containing protein 1 isoform X3 [Vollenhovia emeryi]	156	134	115	71	161	123	235	96	252	0	293	125	158	104	307
CrematogasterSubCLCMeta_c251	ref|XP_011883842.1| PREDICTED: uncharacterized protein LOC105570992 [Vollenhovia emeryi]	0	0	0	179	15	0	0	123	97	583	39	53	114	0	187
CrematogasterSubCLCMeta_c252	ref|XP_003376808.1| retrovirus-related Pol polyprotein from transposon TNT 1-94 [Trichinella spiralis]	61	0	132	3	0	0	11	51	0	15	656	1	178	0	414
CrematogasterSubCLCMeta_c253	ref|XP_003370196.1| putative integrase core domain protein [Trichinella spiralis]	42	16	0	23	10	3	2	19	7	41	16	10	5	0	23
CrematogasterSubCLCMeta_c254	ref|XP_018402840.1| PREDICTED: protein Wnt-5b-like [Cyphomyrmex costatus]	31	31	44	34	13	52	28	26	25	34	34	48	75	63	57
CrematogasterSubCLCMeta_c255	ref|XP_011346797.1| PREDICTED: zinc finger protein castor homolog 1 isoform X2 [Ooceraea biroi]	0	30	1	0	35	28	24	0	68	0	27	9	54	0	6
CrematogasterSubCLCMeta_c256	ref|XP_019888641.1| PREDICTED: LOW QUALITY PROTEIN: uncharacterized protein LOC105287585 [Ooceraea biroi]	85	66	228	28	0	32	34	33	24	0	16	111	254	149	40
CrematogasterSubCLCMeta_c257	#N/A	0	7	0	0	1	30	0	7	6	0	7	4	8	1	17
CrematogasterSubCLCMeta_c258	ref|XP_018310090.1| PREDICTED: uncharacterized protein LOC108726819 [Trachymyrmex zeteki]	711	1229	1282	467	773	1519	665	692	1136	506	566	1324	911	779	1987
CrematogasterSubCLCMeta_c259	ref|XP_018302563.1| PREDICTED: adenylate cyclase type 6 [Trachymyrmex zeteki]	1	23	0	1	24	80	26	12	44	0	30	24	45	6	36
CrematogasterSubCLCMeta_c260	ref|XP_009018722.1| hypothetical protein HELRODRAFT_80770 [Helobdella robusta]	0	9	13	0	1	3	1	0	10	0	0	5	1	0	6
CrematogasterSubCLCMeta_c261	ref|XP_012527568.1| PREDICTED: ATP-binding cassette sub-family G member 1 isoform X1 [Monomorium pharaonis]	224	117	301	168	118	251	137	137	144	224	105	337	106	359	205
CrematogasterSubCLCMeta_c262	#N/A	1	23	37	22	18	10	2	22	33	0	7	18	39	8	71
CrematogasterSubCLCMeta_c263	ref|XP_011641102.1| PREDICTED: putative inorganic phosphate cotransporter [Pogonomyrmex barbatus]	0	11	30	7	8	44	2	9	10	0	0	19	299	0	669
CrematogasterSubCLCMeta_c264	#N/A	0	89	4	0	20	0	0	0	14	0	12	18	0	0	9
CrematogasterSubCLCMeta_c265	ref|XP_011696554.1| PREDICTED: mediator of RNA polymerase II transcription subunit 15-like [Wasmannia auropunctata]	619	514	390	353	578	42	605	216	507	127	306	314	469	367	203
CrematogasterSubCLCMeta_c266	#N/A	23	193	106	9	161	264	288	28	263	12	187	177	51	5	163
CrematogasterSubCLCMeta_c267	ref|XP_018369741.1| PREDICTED: uncharacterized protein LOC108765484 [Trachymyrmex cornetzi]	411	237	331	795	645	26	526	350	294	604	824	91	596	476	145
CrematogasterSubCLCMeta_c268	ref|XP_011688496.1| PREDICTED: geranylgeranyl transferase type-1 subunit beta [Wasmannia auropunctata]	538	253	438	678	510	269	570	549	506	425	681	415	718	318	319
CrematogasterSubCLCMeta_c269	#N/A	0	32	16	12	11	26	25	21	33	9	13	10	25	33	28
CrematogasterSubCLCMeta_c270	ref|XP_011878757.1| PREDICTED: endoplasmic reticulum aminopeptidase 1-like isoform X3 [Vollenhovia emeryi]	7	181	13	83	125	256	156	25	229	16	199	114	18	6	146
CrematogasterSubCLCMeta_c271	ref|XP_018405198.1| PREDICTED: proton-coupled amino acid transporter-like protein CG1139 [Cyphomyrmex costatus]	46	38	80	109	39	99	53	34	66	46	73	88	3360	34	34
CrematogasterSubCLCMeta_c272	ref|XP_011161840.1| PREDICTED: integral membrane protein 2C [Solenopsis invicta]	1245	2698	1468	1287	3047	551	3126	1430	2244	1757	2264	2918	2256	1999	2859
CrematogasterSubCLCMeta_c273	ref|XP_011878016.1| PREDICTED: G-protein coupled receptor Mth2 [Vollenhovia emeryi]	0	9	267	7	8	27	5	12	23	19	7	15	102	33	22
CrematogasterSubCLCMeta_c274	ref|XP_018044022.1| PREDICTED: uncharacterized protein LOC108684288 isoform X1 [Atta colombica]	878	1909	1519	541	668	1903	655	782	827	664	907	1099	1060	1344	2575
CrematogasterSubCLCMeta_c275	ref|XP_011165855.1| PREDICTED: zinc finger protein 2 homolog [Solenopsis invicta]	184	161	409	130	159	382	244	188	222	150	303	95	236	110	163
CrematogasterSubCLCMeta_c276	ref|XP_020297443.1| uncharacterized protein LOC109861981 [Pseudomyrmex gracilis]	28	73	65	46	20	373	20	4	23	0	88	2	0	49	33
CrematogasterSubCLCMeta_c277	ref|XP_018309954.1| PREDICTED: protein sickie isoform X1 [Trachymyrmex zeteki]	10	32	15	37	35	22	7	9	44	7	69	24	44	29	53
CrematogasterSubCLCMeta_c278	ref|XP_011704679.1| PREDICTED: putative inorganic phosphate cotransporter [Wasmannia auropunctata]	964	157	104	0	0	205	0	274	457	247	749	531	0	259	340
CrematogasterSubCLCMeta_c279	ref|XP_018374625.1| PREDICTED: protein CASC3-like isoform X1 [Trachymyrmex cornetzi]	601	253	313	662	356	226	436	409	513	398	831	379	1490	533	523
CrematogasterSubCLCMeta_c280	ref|XP_006623537.1| PREDICTED: uncharacterized protein C4orf29 homolog isoform X1 [Apis dorsata]	45	39	49	44	13	23	42	6	9	230	49	32	43	56	29
CrematogasterSubCLCMeta_c281	ref|XP_011863815.1| PREDICTED: beta-1,4-glucuronyltransferase 1 [Vollenhovia emeryi]	0	51	14	18	58	80	99	15	76	11	169	39	25	0	63
CrematogasterSubCLCMeta_c282	ref|XP_011267057.1| PREDICTED: synapse-associated protein of 47 kDa-like, partial [Camponotus floridanus]	4	24	45	77	11	13	14	34	23	17	39	0	40	29	87
CrematogasterSubCLCMeta_c283	ref|XP_011269597.1| PREDICTED: uncharacterized protein LOC105259394 [Camponotus floridanus]	17	3	57	103	1921	0	49	17	41	33	168	63	454	42	41
CrematogasterSubCLCMeta_c284	ref|XP_018398081.1| PREDICTED: uncharacterized protein LOC108776071 [Cyphomyrmex costatus]	4	16	107	0	7	0	6	6	23	0	17	45	24	0	19
CrematogasterSubCLCMeta_c285	ref|XP_011332157.1| PREDICTED: uncharacterized protein LOC105276333 [Ooceraea biroi]	66	17	15	43	71	40	78	71	61	45	24	29	50	48	56
CrematogasterSubCLCMeta_c286	ref|XP_011646302.1| PREDICTED: protein C12orf4 homolog [Pogonomyrmex barbatus]	181	387	451	319	434	459	394	209	466	286	376	444	434	352	355
CrematogasterSubCLCMeta_c287	ref|XP_018374760.1| PREDICTED: TBC1 domain family member 14-like [Trachymyrmex cornetzi]	184	33	24	163	230	129	266	239	199	96	364	156	235	112	178
CrematogasterSubCLCMeta_c288	ref|XP_012530804.1| PREDICTED: midasin [Monomorium pharaonis]	504	651	744	301	274	915	453	595	674	376	3664	302	714	505	556
CrematogasterSubCLCMeta_c289	ref|XP_011638968.1| PREDICTED: palmitoyltransferase ZDHHC3 isoform X1 [Pogonomyrmex barbatus]	194	128	265	163	212	483	253	211	192	264	628	297	178	249	283
CrematogasterSubCLCMeta_c290	ref|XP_018307159.1| PREDICTED: probable U3 small nucleolar RNA-associated protein 11 [Trachymyrmex zeteki]	362	317	513	531	383	329	421	448	415	319	615	564	409	704	464
CrematogasterSubCLCMeta_c291	#N/A	0	7	0	11	9	18	12	7	32	0	0	28	7	8	17
CrematogasterSubCLCMeta_c292	ref|XP_018315633.1| PREDICTED: nidogen-2 isoform X3 [Trachymyrmex zeteki]	635	847	1156	970	1218	1626	1208	969	1568	1360	2087	950	1258	849	1576
CrematogasterSubCLCMeta_c293	ref|XP_011694040.1| PREDICTED: LOW QUALITY PROTEIN: NF-kappa-B inhibitor cactus-like [Wasmannia auropunctata]	0	6	0	0	2	9	69	3	12	14	141	14	4	40	8
CrematogasterSubCLCMeta_c294	ref|XP_018353982.1| PREDICTED: tyrosine-protein kinase Src64B isoform X1 [Trachymyrmex septentrionalis]	166	82	182	107	261	224	221	180	256	120	315	192	596	263	255
CrematogasterSubCLCMeta_c295	ref|XP_011881898.1| PREDICTED: DNA polymerase zeta catalytic subunit [Vollenhovia emeryi]	62	64	110	104	86	127	76	84	72	141	728	57	190	39	144
CrematogasterSubCLCMeta_c296	ref|XP_018348432.1| PREDICTED: tryptophan 2,3-dioxygenase isoform X1 [Trachymyrmex septentrionalis]	304	498	113	56	117	1143	46	160	88	41	198	545	57	364	168
CrematogasterSubCLCMeta_c297	ref|XP_011692613.1| PREDICTED: G2/mitotic-specific cyclin-B isoform X1 [Wasmannia auropunctata]	170	43	4	61	72	50	20	33	54	13	21	37	110	83	57
CrematogasterSubCLCMeta_c298	ref|XP_011875598.1| PREDICTED: prickle-like protein 3 isoform X5 [Vollenhovia emeryi]	17	35	99	45	19	31	27	35	34	3	61	71	57	48	27
CrematogasterSubCLCMeta_c299	ref|XP_011053737.1| PREDICTED: glutamyl-tRNA(Gln) amidotransferase subunit A, mitochondrial isoform X1 [Acromyrmex echinatior]	103	167	148	52	114	175	108	127	124	68	289	133	144	137	108
CrematogasterSubCLCMeta_c300	ref|XP_018361286.1| PREDICTED: uncharacterized protein LOC108760014 [Trachymyrmex cornetzi]	10	564	38	23	25	17	6	12	13	9	26	1887	24	0	42
CrematogasterSubCLCMeta_c301	ref|XP_011055216.1| PREDICTED: NADH dehydrogenase [ubiquinone] flavoprotein 1, mitochondrial [Acromyrmex echinatior]	48	3019	4001	337	1068	294	24	836	942	633	1296	3673	0	3983	3517
CrematogasterSubCLCMeta_c302	ref|XP_012215306.1| PREDICTED: LOW QUALITY PROTEIN: filamin-A-like [Linepithema humile]	90	1298	827	596	408	5509	529	1152	352	1260	355	979	690	1819	810
CrematogasterSubCLCMeta_c303	ref|XP_018393078.1| PREDICTED: uncharacterized peptidase C1-like protein F26E4.3 isoform X1 [Cyphomyrmex costatus]	753	423	734	155	334	1043	790	955	873	198	1179	870	1465	1158	444
CrematogasterSubCLCMeta_c304	ref|XP_011864091.1| PREDICTED: polypeptide N-acetylgalactosaminyltransferase 5 isoform X1 [Vollenhovia emeryi]	1336	897	1316	1499	1064	861	1582	992	1471	1402	2775	1195	1788	1454	1225
CrematogasterSubCLCMeta_c305	ref|XP_018057053.1| PREDICTED: heat shock 70 kDa protein cognate 3 [Atta colombica]	2195	2668	4314	2966	1669	3400	3801	2594	2132	1511	1751	4284	2450	4077	5591
CrematogasterSubCLCMeta_rep_c306	ref|XP_018392149.1| PREDICTED: formin-J isoform X1 [Cyphomyrmex costatus]	11	198	10	0	112	424	160	14	245	0	228	160	74	3	268
CrematogasterSubCLCMeta_rep_c307	ref|XP_018338091.1| PREDICTED: nuclear hormone receptor FTZ-F1-like [Trachymyrmex septentrionalis]	113	95	115	270	125	192	180	132	152	288	146	112	231	180	123
CrematogasterSubCLCMeta_rep_c308	ref|XP_018312713.1| PREDICTED: protein BTG2-like [Trachymyrmex zeteki]	5006	3941	3814	5165	6209	6739	4973	7496	4664	5822	7165	4073	6584	5527	4662
CrematogasterSubCLCMeta_rep_c309	ref|XP_011690970.1| PREDICTED: E3 ubiquitin-protein ligase UBR5 isoform X6 [Wasmannia auropunctata]	75	1133	214	287	1022	1010	2038	218	1836	146	1091	694	222	243	855
CrematogasterSubCLCMeta_rep_c310	ref|XP_011874728.1| PREDICTED: protein similar isoform X2 [Vollenhovia emeryi]	456	526	864	503	481	133	389	380	427	405	178	206	431	156	517
CrematogasterSubCLCMeta_rep_c311	ref|XP_011166214.1| PREDICTED: syndecan [Solenopsis invicta]	245	484	500	469	278	594	363	331	269	233	40	338	255	460	819
CrematogasterSubCLCMeta_rep_c312	ref|XP_011695288.1| PREDICTED: ubiquitin-protein ligase E3C [Wasmannia auropunctata]	301	234	356	517	462	954	367	300	327	516	218	313	516	626	380
CrematogasterSubCLCMeta_rep_c313	ref|XP_011648408.1| PREDICTED: LOW QUALITY PROTEIN: histone acetyltransferase p300-like [Pogonomyrmex barbatus]	904	496	883	604	760	751	892	607	735	609	1691	851	740	461	868
CrematogasterSubCLCMeta_rep_c314	ref|XP_011879111.1| PREDICTED: F-BAR domain only protein 2 isoform X1 [Vollenhovia emeryi]	402	483	473	469	556	653	696	417	679	225	379	290	636	237	483
CrematogasterSubCLCMeta_rep_c315	#N/A	57	245	88	91	443	385	469	164	519	140	639	223	164	137	350
CrematogasterSubCLCMeta_rep_c316	ref|XP_011699945.1| PREDICTED: multiple C2 and transmembrane domain-containing protein 1 isoform X8 [Wasmannia auropunctata]	819	909	1154	475	730	2021	708	524	818	421	726	870	612	823	1126
CrematogasterSubCLCMeta_rep_c317	ref|XP_018309041.1| PREDICTED: sodium/potassium-transporting ATPase subunit alpha isoform X4 [Trachymyrmex zeteki]	5830	8099	8130	6562	7961	7731	8303	7304	12202	7468	14305	7821	8733	8731	12731
CrematogasterSubCLCMeta_rep_c318	ref|XP_012537769.1| PREDICTED: protein unc-13 homolog B-like isoform X3 [Monomorium pharaonis]	24	196	165	82	94	488	162	48	296	13	111	179	71	244	477
CrematogasterSubCLCMeta_rep_c319	ref|XP_011688544.1| PREDICTED: uncharacterized protein LOC105450421 [Wasmannia auropunctata]	117	405	135	139	457	501	586	103	598	53	607	539	88	139	542
CrematogasterSubCLCMeta_rep_c320	ref|XP_012522078.1| PREDICTED: uncharacterized protein LOC105828349 isoform X2 [Monomorium pharaonis]	30	90	135	400	105	680	201	44	465	223	217	76	7	58	99
CrematogasterSubCLCMeta_rep_c321	ref|XP_011262487.1| PREDICTED: uncharacterized protein LOC105255092 isoform X4 [Camponotus floridanus]	1180	1533	1890	1072	1491	2590	1714	1071	2058	1239	2256	2068	1328	2026	1809
CrematogasterSubCLCMeta_rep_c322	ref|XP_012060739.1| PREDICTED: LOW QUALITY PROTEIN: longitudinals lacking protein, isoforms A/B/D/L-like [Atta cephalotes]	771	2747	3538	1033	2227	5106	3058	2601	4792	2015	3990	2318	3592	1465	2629
CrematogasterSubCLCMeta_rep_c323	ref|XP_011159336.1| PREDICTED: very low-density lipoprotein receptor-like isoform X2 [Solenopsis invicta]	2030	2229	2492	3045	3277	4427	1666	2108	2497	3780	1912	2954	1829	2421	2574
CrematogasterSubCLCMeta_rep_c324	#N/A	135	134	128	76	240	162	190	148	149	50	272	172	138	136	167
CrematogasterSubCLCMeta_rep_c325	ref|XP_011871930.1| PREDICTED: uncharacterized protein LOC105564278 isoform X1 [Vollenhovia emeryi]	407	324	321	315	514	211	699	485	1000	504	644	520	599	416	678
CrematogasterSubCLCMeta_rep_c326	ref|XP_018377560.1| PREDICTED: uncharacterized protein LOC108770452 isoform X2 [Trachymyrmex cornetzi]	298	612	965	535	175	748	157	418	295	234	241	491	574	250	766
CrematogasterSubCLCMeta_rep_c327	ref|XP_018373010.1| PREDICTED: calmodulin-binding transcription activator 2 isoform X1 [Trachymyrmex cornetzi]	85	1113	315	81	266	68	906	44	726	0	880	944	170	286	1549
CrematogasterSubCLCMeta_rep_c328	ref|XP_018343615.1| PREDICTED: uncharacterized protein LOC108749416 isoform X5 [Trachymyrmex septentrionalis]	0	80	28	66	142	135	77	22	187	47	252	65	75	69	141
CrematogasterSubCLCMeta_rep_c329	ref|XP_011065106.1| PREDICTED: uncharacterized protein LOC105152476 [Acromyrmex echinatior]	22	517	111	128	399	278	676	64	816	89	689	359	81	116	519
CrematogasterSubCLCMeta_rep_c330	ref|XP_011871349.1| PREDICTED: protein inscuteable homolog [Vollenhovia emeryi]	1420	604	1355	866	546	1049	932	686	834	735	2269	830	1827	1884	872
CrematogasterSubCLCMeta_rep_c331	ref|XP_011867218.1| PREDICTED: uncharacterized protein LOC105561657 isoform X3 [Vollenhovia emeryi]	158	187	337	245	117	269	101	129	167	131	760	190	1558	229	231
CrematogasterSubCLCMeta_c332	ref|XP_011164622.1| PREDICTED: zinc finger protein 2-like isoform X4 [Solenopsis invicta]	356	306	313	527	270	127	216	89	269	87	600	356	276	554	464
CrematogasterSubCLCMeta_rep_c333	ref|XP_012232638.1| PREDICTED: muscle LIM protein Mlp84B-like isoform X2 [Linepithema humile]	60623	40088	41347	46542	28039	22013	50933	50236	52957	72315	12580	54229	37106	82415	34944
CrematogasterSubCLCMeta_rep_c334	ref|XP_011157802.1| PREDICTED: short-chain specific acyl-CoA dehydrogenase, mitochondrial [Solenopsis invicta]	1861	96	99	1675	1967	1287	1750	1182	1879	1738	1584	320	1682	256	316
CrematogasterSubCLCMeta_rep_c335	ref|XP_011875883.1| PREDICTED: eukaryotic translation initiation factor 4E transporter-like isoform X3 [Vollenhovia emeryi]	1169	604	829	1266	1429	1260	1363	1056	1837	1313	1801	761	1784	1002	1030
CrematogasterSubCLCMeta_rep_c336	ref|XP_011644052.1| PREDICTED: uncharacterized protein LOC105431515 isoform X4 [Pogonomyrmex barbatus]	206	255	463	332	710	1118	416	375	516	32	1209	201	502	291	299
CrematogasterSubCLCMeta_rep_c337	ref|XP_011160135.1| PREDICTED: uncharacterized protein LOC105196091 isoform X1 [Solenopsis invicta]	637	148	31	808	214	674	1470	222	1567	1206	3453	91	1200	217	101
CrematogasterSubCLCMeta_rep_c338	ref|XP_011637055.1| PREDICTED: LOW QUALITY PROTEIN: choline O-acetyltransferase, partial [Pogonomyrmex barbatus]	28	589	74	99	655	488	805	37	1200	122	941	377	64	4	208
CrematogasterSubCLCMeta_rep_c339	ref|XP_011870388.1| PREDICTED: zinc finger protein 34-like isoform X2 [Vollenhovia emeryi]	4238	1643	3444	3992	4703	2565	4133	1978	4124	3821	4545	3366	4679	2370	3441
CrematogasterSubCLCMeta_rep_c340	ref|XP_011877174.1| PREDICTED: GMP synthase [glutamine-hydrolyzing] [Vollenhovia emeryi]	658	396	790	251	425	427	532	402	607	538	1145	439	854	724	487
CrematogasterSubCLCMeta_rep_c341	ref|XP_011863784.1| PREDICTED: chromodomain-helicase-DNA-binding protein 1 isoform X6 [Vollenhovia emeryi]	560	500	503	828	566	259	714	396	658	366	633	569	519	168	654
CrematogasterSubCLCMeta_rep_c342	ref|XP_011883894.1| PREDICTED: uncharacterized protein LOC105571037 [Vollenhovia emeryi]	116	35	55	53	150	34	442	11	1377	327	0	239	5	290	373
CrematogasterSubCLCMeta_rep_c343	ref|XP_011690597.1| PREDICTED: vacuolar protein sorting-associated protein 13B [Wasmannia auropunctata]	249	423	729	272	347	843	224	42	116	228	579	408	253	519	354
CrematogasterSubCLCMeta_rep_c344	ref|XP_011703758.1| PREDICTED: TBC1 domain family member 16 [Wasmannia auropunctata]	209	237	348	195	184	1351	375	168	258	257	519	210	331	70	169
CrematogasterSubCLCMeta_rep_c345	ref|XP_018318112.1| PREDICTED: LOW QUALITY PROTEIN: chromodomain-helicase-DNA-binding protein 7 [Trachymyrmex zeteki]	645	1013	1412	567	949	3469	1316	940	973	519	857	877	1102	626	1326
CrematogasterSubCLCMeta_rep_c346	ref|XP_018311195.1| PREDICTED: uncharacterized protein LOC108727540 isoform X1 [Trachymyrmex zeteki]	1064	1104	1720	1188	1811	2101	1812	1300	1685	1241	2368	1669	2186	813	1658
CrematogasterSubCLCMeta_rep_c347	ref|XP_011875644.1| PREDICTED: protein MON2 homolog isoform X2 [Vollenhovia emeryi]	859	230	280	682	722	1933	281	200	654	373	367	104	539	57	144
CrematogasterSubCLCMeta_rep_c348	ref|XP_011633561.1| PREDICTED: sn1-specific diacylglycerol lipase alpha isoform X2 [Pogonomyrmex barbatus]	820	2234	3536	434	438	2731	1424	995	360	905	681	2472	1177	2339	1568
CrematogasterSubCLCMeta_rep_c349	ref|XP_018048021.1| PREDICTED: regulator of G-protein signaling 17 isoform X3 [Atta colombica]	16	328	59	142	249	256	296	60	386	74	595	312	152	117	613
CrematogasterSubCLCMeta_rep_c350	ref|XP_018054561.1| PREDICTED: protein prenyltransferase alpha subunit repeat-containing protein 1 [Atta colombica]	0	7	0	0	9	64	0	0	0	0	0	0	0	0	0
CrematogasterSubCLCMeta_rep_c351	ref|XP_018054561.1| PREDICTED: protein prenyltransferase alpha subunit repeat-containing protein 1 [Atta colombica]	1945	2085	843	2237	1643	568	2524	1568	1806	1707	2529	695	1858	559	1852
CrematogasterSubCLCMeta_rep_c352	#N/A	9	64	25	21	35	51	50	13	53	17	79	17	18	21	65
CrematogasterSubCLCMeta_rep_c353	ref|XP_011692700.1| PREDICTED: glycine N-methyltransferase [Wasmannia auropunctata]	9031	6004	17147	5385	6617	2183	4240	9989	6416	10177	31902	5897	4538	5113	6235
CrematogasterSubCLCMeta_rep_c354	ref|XP_012541030.1| PREDICTED: neural-cadherin isoform X6 [Monomorium pharaonis]	41	219	80	94	282	270	240	183	200	68	2636	254	91	44	254
CrematogasterSubCLCMeta_rep_c355	ref|XP_012533870.1| PREDICTED: pumilio homolog 2 isoform X2 [Monomorium pharaonis]	830	378	462	826	878	1912	826	560	860	574	1304	492	972	423	511
CrematogasterSubCLCMeta_rep_c356	ref|XP_011644568.1| PREDICTED: homeobox protein homothorax-like [Pogonomyrmex barbatus]	168	239	293	228	246	417	293	293	408	234	1105	469	233	344	575
CrematogasterSubCLCMeta_rep_c357	ref|XP_011157260.1| PREDICTED: arginine-glutamic acid dipeptide repeats protein isoform X3 [Solenopsis invicta]	430	575	695	433	522	433	375	514	470	353	635	725	564	609	728
CrematogasterSubCLCMeta_rep_c358	ref|XP_011167319.1| PREDICTED: mucin-12 [Solenopsis invicta]	286	183	452	219	240	801	251	185	298	233	1450	206	393	299	351
CrematogasterSubCLCMeta_rep_c359	ref|XP_018054027.1| PREDICTED: mediator of RNA polymerase II transcription subunit 13 isoform X1 [Atta colombica]	1877	2103	3613	1625	1895	4051	2013	1612	2179	2337	1762	2193	2114	1491	2050
CrematogasterSubCLCMeta_rep_c360	ref|XP_011268347.1| PREDICTED: calcium-activated potassium channel slowpoke isoform X25 [Camponotus floridanus]	427	1277	1181	573	1038	3157	799	735	804	450	1006	954	881	620	1266
CrematogasterSubCLCMeta_c361	ref|XP_011865882.1| PREDICTED: rho GTPase-activating protein gacF-like isoform X1 [Vollenhovia emeryi]	158	424	488	157	341	749	437	15	318	7	98	258	42	249	261
CrematogasterSubCLCMeta_rep_c362	ref|XP_011633132.1| PREDICTED: trithorax group protein osa isoform X2 [Pogonomyrmex barbatus]	3176	1865	2931	4005	3616	2843	3191	2474	3468	3595	4276	2317	4125	3290	2498
CrematogasterSubCLCMeta_c363	ref|XP_011053629.1| PREDICTED: serine/threonine-protein kinase 17B-like isoform X2 [Acromyrmex echinatior]	764	868	1281	847	781	1203	687	312	493	664	2187	553	559	1292	1026
CrematogasterSubCLCMeta_rep_c364	ref|XP_018377149.1| PREDICTED: atypical protein kinase C isoform X5 [Trachymyrmex cornetzi]	160	111	44	68	124	1298	86	55	116	177	99	0	88	0	10
CrematogasterSubCLCMeta_rep_c365	ref|XP_011171352.1| PREDICTED: staphylococcal nuclease domain-containing protein 1 [Solenopsis invicta]	8424	6861	6532	7597	5788	5909	5710	7640	6116	5841	4725	5395	7187	6544	6557
CrematogasterSubCLCMeta_rep_c366	ref|XP_012543681.1| PREDICTED: epithelial discoidin domain-containing receptor 1-like isoform X2 [Monomorium pharaonis]	8	214	120	66	373	478	433	135	584	35	476	397	204	56	326
CrematogasterSubCLCMeta_rep_c367	ref|XP_011877934.1| PREDICTED: uncharacterized protein LOC105567586 isoform X1 [Vollenhovia emeryi]	103	49	57	82	85	24	69	45	85	113	46	34	333	13	74
CrematogasterSubCLCMeta_rep_c368	ref|XP_012349428.1| PREDICTED: LOW QUALITY PROTEIN: uncharacterized protein LOC105736982 [Apis florea]	4371	89	2096	7966	4860	3232	9845	3964	3785	6896	2501	160	8496	55	839
CrematogasterSubCLCMeta_rep_c369	ref|XP_018053486.1| PREDICTED: uncharacterized protein LOC108690612 [Atta colombica]	9079	18547	31701	14808	13363	11605	17811	3401	5964	10019	19061	24878	20155	37666	30878
CrematogasterSubCLCMeta_rep_c370	ref|XP_011872627.1| PREDICTED: ankyrin-2-like isoform X2 [Vollenhovia emeryi]	42	443	396	162	138	1446	52	36	85	136	187	255	72	489	343
CrematogasterSubCLCMeta_rep_c371	ref|XP_018349724.1| PREDICTED: ras-related protein Rab-5B isoform X2 [Trachymyrmex septentrionalis]	2640	1355	2015	3251	2597	4255	3144	3572	2148	3126	3328	1762	2129	3267	3734
CrematogasterSubCLCMeta_rep_c372	ref|XP_011864937.1| PREDICTED: sodium-coupled neutral amino acid transporter 9-like [Vollenhovia emeryi]	653	491	527	322	361	481	421	327	329	534	724	513	468	431	481
CrematogasterSubCLCMeta_rep_c373	ref|XP_011870446.1| PREDICTED: FERM domain-containing protein 5 isoform X2 [Vollenhovia emeryi]	9944	4695	3842	8604	6645	5047	7751	14507	9756	4952	2559	6531	8080	6533	7736
CrematogasterSubCLCMeta_rep_c374	ref|XP_011878984.1| PREDICTED: uncharacterized protein LOC105568161 isoform X3 [Vollenhovia emeryi]	1450	1575	2754	1609	1042	2372	1342	1897	1947	2182	393	1755	2386	4620	1237
CrematogasterSubCLCMeta_rep_c375	ref|XP_011866536.1| PREDICTED: uncharacterized protein LOC105561295 isoform X1 [Vollenhovia emeryi]	341	252	292	273	383	425	273	229	142	468	361	360	414	417	424
CrematogasterSubCLCMeta_rep_c376	ref|XP_018378445.1| PREDICTED: E3 SUMO-protein ligase RanBP2 isoform X3 [Trachymyrmex cornetzi]	27	34	282	0	17	994	14	5	23	22	41	293	0	364	149
CrematogasterSubCLCMeta_rep_c377	ref|XP_018342002.1| PREDICTED: rho-related BTB domain-containing protein 1 isoform X3 [Trachymyrmex septentrionalis]	150	211	153	121	179	354	469	172	256	78	123	425	76	667	845
CrematogasterSubCLCMeta_rep_c378	ref|XP_011638774.1| PREDICTED: peripheral plasma membrane protein CASK isoform X11 [Pogonomyrmex barbatus]	475	1117	585	572	1328	1780	1445	384	1496	404	1359	1150	866	743	1608
CrematogasterSubCLCMeta_rep_c379	ref|XP_011877924.1| PREDICTED: uncharacterized protein LOC105567577 isoform X2 [Vollenhovia emeryi]	128	290	54	205	541	1098	578	80	552	56	427	67	95	52	137
CrematogasterSubCLCMeta_rep_c380	ref|XP_011253733.1| PREDICTED: Down syndrome cell adhesion molecule-like protein Dscam2 isoform X4 [Camponotus floridanus]	24	306	29	72	349	298	309	21	418	13	352	304	109	2	387
CrematogasterSubCLCMeta_rep_c381	ref|XP_018374662.1| PREDICTED: synaptic functional regulator FMR1 isoform X4 [Trachymyrmex cornetzi]	641	984	1932	686	1071	1424	575	552	561	798	1280	1402	943	1455	1333
CrematogasterSubCLCMeta_rep_c382	ref|XP_011054107.1| PREDICTED: uncharacterized protein LOC105145906 [Acromyrmex echinatior]	63	100	66	39	38	13	43	38	69	45	10	22	104	64	55
CrematogasterSubCLCMeta_rep_c383	ref|XP_011864589.1| PREDICTED: protein FAM46C isoform X1 [Vollenhovia emeryi]	0	8	38	206	0	0	72	88	199	188	61	20	71	0	11
CrematogasterSubCLCMeta_rep_c384	ref|XP_011864589.1| PREDICTED: protein FAM46C isoform X1 [Vollenhovia emeryi]	613	684	971	505	460	953	435	751	723	862	1110	855	633	725	1190
CrematogasterSubCLCMeta_rep_c385	#N/A	0	0	0	0	0	470	0	0	0	0	0	0	0	2	0
CrematogasterSubCLCMeta_rep_c386	ref|XP_018392991.1| PREDICTED: protein charybde-like [Cyphomyrmex costatus]	1181	429	333	499	824	222	774	538	744	368	608	701	539	470	747
CrematogasterSubCLCMeta_rep_c387	ref|XP_018347584.1| PREDICTED: cytosolic purine 5'-nucleotidase isoform X1 [Trachymyrmex septentrionalis]	420	785	535	294	466	5770	500	166	309	90	696	1063	170	1073	757
CrematogasterSubCLCMeta_rep_c388	ref|XP_011631050.1| PREDICTED: uncharacterized protein LOC105423105 isoform X3 [Pogonomyrmex barbatus]	129	174	396	130	207	798	136	112	172	162	102	417	332	281	239
CrematogasterSubCLCMeta_rep_c389	ref|XP_011160579.1| PREDICTED: tyrosine-protein kinase Dnt-like isoform X2 [Solenopsis invicta]	70	62	144	93	26	95	33	37	83	30	216	91	598	5	151
CrematogasterSubCLCMeta_rep_c390	ref|XP_011172708.1| PREDICTED: A disintegrin and metalloproteinase with thrombospondin motifs 9 isoform X2 [Solenopsis invicta]	160	79	475	10	46	576	194	199	175	544	0	106	551	37	176
CrematogasterSubCLCMeta_rep_c391	ref|XP_018306216.1| PREDICTED: cytochrome b5-like [Trachymyrmex zeteki]	7535	322	1029	11337	155	2822	5278	129	6929	15265	5055	198	8082	1067	310
CrematogasterSubCLCMeta_rep_c392	ref|XP_011878272.1| PREDICTED: 85/88 kDa calcium-independent phospholipase A2 [Vollenhovia emeryi]	17	23	316	0	24	6	20	20	6	24	82	9	229	23	17
CrematogasterSubCLCMeta_rep_c393	ref|XP_011876409.1| PREDICTED: uncharacterized protein LOC105566759 isoform X2 [Vollenhovia emeryi]	724	119	613	776	683	889	779	601	625	557	852	322	1001	207	310
CrematogasterSubCLCMeta_rep_c394	#N/A	1904	1666	2146	2526	3288	2053	2393	1731	1580	2992	5853	2696	1937	1298	1706
CrematogasterSubCLCMeta_rep_c395	ref|XP_011060105.1| PREDICTED: vascular endothelial growth factor receptor 1 isoform X1 [Acromyrmex echinatior]	0	29	20	0	5	1113	2	22	10	0	14	60	26	88	4
CrematogasterSubCLCMeta_rep_c396	ref|XP_012542415.1| PREDICTED: receptor-type tyrosine-protein phosphatase F-like isoform X1 [Monomorium pharaonis]	4	0	0	0	64	7	26	30	17	33	0	30	62	72	17
CrematogasterSubCLCMeta_rep_c397	ref|XP_012523963.1| PREDICTED: uncharacterized protein LOC105829548 [Monomorium pharaonis]	156	152	109	85	26	185	105	77	86	10	329	142	158	237	224
CrematogasterSubCLCMeta_rep_c398	ref|XP_012541553.1| PREDICTED: protein cordon-bleu [Monomorium pharaonis]	448	328	501	567	403	178	329	490	421	383	268	517	346	565	752
CrematogasterSubCLCMeta_rep_c399	#N/A	92	80	60	185	92	81	84	46	82	8	134	102	51	187	117
CrematogasterSubCLCMeta_rep_c400	ref|XP_011872567.1| PREDICTED: uncharacterized protein LOC105564646 [Vollenhovia emeryi]	3089	1175	2355	765	6515	4763	6694	5129	4842	3032	7736	2862	6934	189	1740
CrematogasterSubCLCMeta_rep_c401	ref|XP_011866272.1| PREDICTED: isoleucine--tRNA ligase, cytoplasmic [Vollenhovia emeryi]	620	590	1046	833	728	2918	758	512	538	748	1737	535	899	726	845
CrematogasterSubCLCMeta_rep_c402	ref|XP_018397658.1| PREDICTED: troponin I-like isoform X12 [Cyphomyrmex costatus]	6431	7113	8980	6115	4072	4284	7081	8588	9161	14097	2039	9206	7185	18021	5001
CrematogasterSubCLCMeta_rep_c403	ref|XP_011694728.1| PREDICTED: mucin-17-like [Wasmannia auropunctata]	4926	4162	6677	5312	5476	6811	4683	4529	5566	4282	7142	4928	5057	5342	7191
CrematogasterSubCLCMeta_rep_c404	ref|XP_011646141.1| PREDICTED: KAT8 regulatory NSL complex subunit 1 [Pogonomyrmex barbatus]	681	684	481	689	655	939	956	436	788	818	3420	653	729	679	1116
CrematogasterSubCLCMeta_rep_c405	ref|XP_012217985.1| PREDICTED: zinc transporter 2-like isoform X1 [Linepithema humile]	47	82	103	8	43	275	104	56	61	0	288	72	60	95	86
CrematogasterSubCLCMeta_rep_c406	ref|XP_012217985.1| PREDICTED: zinc transporter 2-like isoform X1 [Linepithema humile]	203	29	142	92	75	142	118	145	233	398	2393	163	218	270	285
CrematogasterSubCLCMeta_rep_c407	ref|XP_011693225.1| PREDICTED: delta-1-pyrroline-5-carboxylate synthase [Wasmannia auropunctata]	189	66	142	171	47	5388	132	311	106	139	74	153	71	217	153
CrematogasterSubCLCMeta_rep_c408	ref|XP_018362602.1| PREDICTED: protein BCL9 homolog isoform X2 [Trachymyrmex cornetzi]	330	524	665	1072	504	990	357	569	303	216	873	578	506	511	810
CrematogasterSubCLCMeta_rep_c409	ref|XP_011166619.1| PREDICTED: uncharacterized protein LOC105200666 isoform X1 [Solenopsis invicta]	451	545	1260	686	503	817	613	197	543	618	805	701	392	1585	860
CrematogasterSubCLCMeta_rep_c410	ref|XP_011691803.1| PREDICTED: uncharacterized protein LOC105452427 isoform X1 [Wasmannia auropunctata]	557	406	869	277	204	803	399	392	333	371	569	523	728	1572	499
CrematogasterSubCLCMeta_rep_c411	ref|XP_018357858.1| PREDICTED: protein bric-a-brac 2-like isoform X5 [Trachymyrmex cornetzi]	22	37	35	0	8	96	12	0	51	0	0	29	25	0	49
CrematogasterSubCLCMeta_rep_c412	ref|XP_018375060.1| PREDICTED: pleckstrin homology domain-containing family G member 5-like isoform X2 [Trachymyrmex cornetzi]	149	248	408	124	252	497	269	327	485	43	930	385	224	325	727
CrematogasterSubCLCMeta_rep_c413	ref|XP_011703204.1| PREDICTED: fatty acid synthase [Wasmannia auropunctata]	195	4155	9526	2293	135	62213	145	217	195	214	27	20318	95	21560	18573
CrematogasterSubCLCMeta_rep_c414	ref|XP_011695049.1| PREDICTED: Down syndrome cell adhesion molecule-like protein Dscam2 [Wasmannia auropunctata]	28	256	17	69	360	366	430	29	512	61	321	192	56	73	287
CrematogasterSubCLCMeta_rep_c415	ref|XP_001866950.1| conserved hypothetical protein [Culex quinquefasciatus]	122	156	258	120	124	8	170	104	159	192	89	181	105	256	146
CrematogasterSubCLCMeta_rep_c416	ref|XP_011058489.1| PREDICTED: uncharacterized protein LOC105148453 [Acromyrmex echinatior]	9	21	14	17	31	38	14	1	36	0	17	15	10	0	37
CrematogasterSubCLCMeta_rep_c417	ref|XP_011686899.1| PREDICTED: SAP30-binding protein [Wasmannia auropunctata]	21	87	34	85	94	420	0	68	61	337	58	82	42	63	35
CrematogasterSubCLCMeta_rep_c418	ref|XP_011877009.1| PREDICTED: uncharacterized protein LOC105567071 [Vollenhovia emeryi]	82	330	175	164	284	621	675	293	856	231	511	251	360	189	964
CrematogasterSubCLCMeta_rep_c419	ref|XP_011157768.1| PREDICTED: nucleolar protein 6 [Solenopsis invicta]	352	301	436	403	269	293	529	266	357	470	2901	379	1775	307	307
CrematogasterSubCLCMeta_rep_c420	ref|XP_011866562.1| PREDICTED: oxidative stress-induced growth inhibitor 2-like [Vollenhovia emeryi]	944	1243	1324	1432	1321	1401	1222	839	1720	1137	2623	1864	1073	1118	1611
CrematogasterSubCLCMeta_rep_c421	ref|XP_012535360.1| PREDICTED: ion transport peptide-like isoform X2 [Monomorium pharaonis]	138	120	116	0	199	39	177	214	120	26	514	194	244	181	55
CrematogasterSubCLCMeta_rep_c422	ref|XP_011865071.1| PREDICTED: monocarboxylate transporter 10 isoform X2 [Vollenhovia emeryi]	160	1651	926	308	491	368	51	42	2284	0	0	951	941	1737	2147
CrematogasterSubCLCMeta_rep_c423	ref|XP_011630011.1| PREDICTED: nucleus accumbens-associated protein 2-like isoform X2 [Pogonomyrmex barbatus]	773	821	470	767	664	1880	678	467	421	268	572	658	331	791	846
CrematogasterSubCLCMeta_rep_c424	ref|XP_011696870.1| PREDICTED: DNA-directed RNA polymerase II subunit RPB1 [Wasmannia auropunctata]	53	126	231	203	418	741	121	156	297	338	422	138	225	179	113
CrematogasterSubCLCMeta_rep_c425	ref|XP_011861263.1| PREDICTED: hamartin isoform X2 [Vollenhovia emeryi]	1499	1436	1586	1462	1022	1957	1831	963	1614	1436	1634	2072	983	1579	2174
CrematogasterSubCLCMeta_rep_c426	ref|XP_018302277.1| PREDICTED: J domain-containing protein isoform X2 [Trachymyrmex zeteki]	0	770	355	0	270	3473	36	12	52	54	79	751	39	86	773
CrematogasterSubCLCMeta_c427	ref|XP_011171579.1| PREDICTED: leucine-rich repeat-containing protein 16A isoform X2 [Solenopsis invicta]	358	413	528	577	443	1476	344	369	455	147	698	471	415	636	438
CrematogasterSubCLCMeta_rep_c428	ref|XP_012057797.1| PREDICTED: mediator of RNA polymerase II transcription subunit 12 [Atta cephalotes]	459	467	605	604	391	550	556	445	657	527	1017	580	635	627	792
CrematogasterSubCLCMeta_rep_c429	ref|XP_018367718.1| PREDICTED: plexin-A4 [Trachymyrmex cornetzi]	476	872	475	909	695	815	675	1102	759	605	2458	667	1238	878	1110
CrematogasterSubCLCMeta_rep_c430	ref|XP_011168255.1| PREDICTED: uncharacterized protein CG43867 isoform X4 [Solenopsis invicta]	336	831	608	594	715	257	875	482	1058	574	1938	851	830	811	920
CrematogasterSubCLCMeta_rep_c431	ref|XP_011869554.1| PREDICTED: protein enabled isoform X3 [Vollenhovia emeryi]	260	352	396	246	531	627	280	237	303	4	640	446	419	217	275
CrematogasterSubCLCMeta_rep_c432	ref|XP_018362715.1| PREDICTED: kinase D-interacting substrate of 220 kDa isoform X1 [Trachymyrmex cornetzi]	784	615	1114	867	1512	697	802	672	869	539	2558	857	1197	612	918
CrematogasterSubCLCMeta_rep_c433	ref|XP_011255708.1| PREDICTED: histone deacetylase 9 isoform X2 [Camponotus floridanus]	2887	1817	2904	2609	5323	2583	2399	2310	2866	3673	6440	1982	2613	1420	3306
CrematogasterSubCLCMeta_rep_c434	ref|XP_012060705.1| PREDICTED: neural cell adhesion molecule 1 [Atta cephalotes]	362	139	702	48	171	259	145	208	280	176	402	334	204	310	145
CrematogasterSubCLCMeta_rep_c435	ref|XP_011634595.1| PREDICTED: uncharacterized protein LOC105425496 isoform X1 [Pogonomyrmex barbatus]	35	468	254	0	0	179	9	4	7	0	60	753	29	575	629
CrematogasterSubCLCMeta_rep_c436	ref|XP_011866324.1| PREDICTED: ankyrin repeat domain-containing protein 50 isoform X3 [Vollenhovia emeryi]	1156	1907	2843	1082	1340	2267	2145	1484	2566	1613	2246	1919	2108	2226	2092
CrematogasterSubCLCMeta_rep_c437	ref|XP_011882358.1| PREDICTED: alpha-protein kinase 1 isoform X4 [Vollenhovia emeryi]	6939	143	2167	2336	3561	475	3540	4348	641	2868	159	221	637	198	650
CrematogasterSubCLCMeta_rep_c438	ref|XP_014473627.1| PREDICTED: tensin-3 isoform X4 [Dinoponera quadriceps]	82	80	114	193	173	49	73	124	98	0	5	72	49	101	167
CrematogasterSubCLCMeta_c439	ref|XP_011161090.1| PREDICTED: SH2B adapter protein 1 [Solenopsis invicta]	844	421	661	692	1045	105	576	400	782	810	2067	137	1198	0	198
CrematogasterSubCLCMeta_rep_c440	ref|XP_018395382.1| PREDICTED: uncharacterized protein K02A2.6-like [Cyphomyrmex costatus]	2244	47	52	4668	256	88	1690	1733	2319	1017	16	63	198	295	80
CrematogasterSubCLCMeta_rep_c441	ref|XP_018345964.1| PREDICTED: LOW QUALITY PROTEIN: formin-like protein 7, partial [Trachymyrmex septentrionalis]	1191	701	1649	667	1312	1543	1194	1008	1409	1210	1254	1303	1913	1024	950
CrematogasterSubCLCMeta_rep_c442	ref|XP_014368705.1| PREDICTED: myeloid differentiation primary response protein MyD88-A [Papilio machaon]	154	99	189	250	139	146	149	225	260	89	277	114	199	371	380
CrematogasterSubCLCMeta_rep_c443	ref|XP_018402060.1| PREDICTED: LOW QUALITY PROTEIN: acetyl-CoA carboxylase [Cyphomyrmex costatus]	15066	19770	32004	22583	22856	10196	20288	27073	34681	16891	4305	22584	19266	14952	16026
CrematogasterSubCLCMeta_rep_c444	ref|XP_011883326.1| PREDICTED: WASH complex subunit 7 [Vollenhovia emeryi]	918	428	358	739	744	611	936	619	899	975	1329	527	558	616	818
CrematogasterSubCLCMeta_rep_c445	ref|XP_011876142.1| PREDICTED: fibrillin-1-like [Vollenhovia emeryi]	29	52	0	0	20	131	71	2	27	44	0	9	0	0	9
CrematogasterSubCLCMeta_rep_c446	ref|XP_011876142.1| PREDICTED: fibrillin-1-like [Vollenhovia emeryi]	137	213	1	61	293	0	498	3	533	65	61	192	52	0	809
CrematogasterSubCLCMeta_rep_c447	ref|XP_011866137.1| PREDICTED: probable G-protein coupled receptor B0563.6 isoform X1 [Vollenhovia emeryi]	52	89	60	78	142	184	147	38	122	0	214	104	14	27	88
CrematogasterSubCLCMeta_rep_c448	ref|XP_011882584.1| PREDICTED: DNA polymerase epsilon catalytic subunit A [Vollenhovia emeryi]	967	693	1083	946	928	892	769	837	851	830	671	1127	1532	1301	846
CrematogasterSubCLCMeta_rep_c449	ref|XP_018396871.1| PREDICTED: dystrophin, isoforms A/C/F/G/H [Cyphomyrmex costatus]	18	41	56	18	58	76	10	21	27	35	57	7	245	112	76
CrematogasterSubCLCMeta_rep_c450	ref|XP_011869764.1| PREDICTED: WASH complex subunit FAM21 isoform X1 [Vollenhovia emeryi]	28	187	0	18	59	797	77	17	32	20	71	54	96	154	122
CrematogasterSubCLCMeta_rep_c451	ref|XP_018051560.1| PREDICTED: golgin subfamily A member 4-like [Atta colombica]	1317	464	2390	2705	1840	3254	757	2143	1841	1022	1195	688	3279	1002	859
CrematogasterSubCLCMeta_rep_c452	ref|XP_011166471.1| PREDICTED: glypican-6 isoform X1 [Solenopsis invicta]	435	788	608	1014	157	827	506	796	585	905	149	829	730	1970	1557
CrematogasterSubCLCMeta_rep_c453	ref|XP_018054549.1| PREDICTED: UNC93-like protein [Atta colombica]	11	137	20	6	199	196	236	11	247	0	310	111	48	26	190
CrematogasterSubCLCMeta_rep_c454	ref|XP_018349524.1| PREDICTED: zinc finger protein 628-like isoform X2 [Trachymyrmex septentrionalis]	69	88	72	49	66	179	40	76	86	33	98	79	131	59	229
CrematogasterSubCLCMeta_rep_c455	ref|XP_018043768.1| PREDICTED: microtubule-associated serine/threonine-protein kinase 3 isoform X2 [Atta colombica]	204	367	398	327	150	798	392	173	423	45	585	164	438	301	404
CrematogasterSubCLCMeta_rep_c456	ref|XP_011173365.1| PREDICTED: uncharacterized protein LOC105205641 [Solenopsis invicta]	78	99	178	0	88	0	58	0	0	29	0	137	6	200	212
CrematogasterSubCLCMeta_rep_c457	ref|XP_011877328.1| PREDICTED: uncharacterized protein LOC105567237 isoform X1 [Vollenhovia emeryi]	791	737	527	649	471	603	800	1258	1041	899	4130	640	1334	445	689
CrematogasterSubCLCMeta_rep_c458	ref|XP_018059892.1| PREDICTED: DNA-directed RNA polymerases I, II, and III subunit RPABC3 isoform X2 [Atta colombica]	1344	924	1031	1215	1823	1118	1802	968	1360	1394	3227	1139	1060	862	1115
CrematogasterSubCLCMeta_rep_c459	ref|XP_018304444.1| PREDICTED: FERM, RhoGEF and pleckstrin domain-containing protein 1-like isoform X2 [Trachymyrmex zeteki]	338	217	285	453	449	349	633	597	963	485	562	119	567	438	187
CrematogasterSubCLCMeta_rep_c460	ref|XP_018305383.1| PREDICTED: E3 ubiquitin-protein ligase znrf1 [Trachymyrmex zeteki]	367	881	925	325	477	1014	231	256	160	5	730	1088	225	866	1007
CrematogasterSubCLCMeta_rep_c461	ref|XP_011703743.1| PREDICTED: transient receptor potential cation channel trpm isoform X3 [Wasmannia auropunctata]	1699	3304	3859	1928	2287	1432	2003	2146	2347	2019	1905	2570	2476	2924	3496
CrematogasterSubCLCMeta_rep_c462	ref|XP_011876905.1| PREDICTED: coiled-coil domain-containing protein 132 [Vollenhovia emeryi]	231	593	321	368	228	385	246	123	189	158	374	439	329	399	467
CrematogasterSubCLCMeta_rep_c463	ref|XP_018366159.1| PREDICTED: sodium- and chloride-dependent GABA transporter ine isoform X1 [Trachymyrmex cornetzi]	1216	355	464	549	2121	881	859	667	1062	416	2298	320	1734	447	519
CrematogasterSubCLCMeta_rep_c464	ref|XP_018397791.1| PREDICTED: LOW QUALITY PROTEIN: serine/threonine-protein kinase NLK [Cyphomyrmex costatus]	261	146	150	250	146	286	171	296	328	255	186	159	167	140	375
CrematogasterSubCLCMeta_rep_c465	ref|XP_011164875.1| PREDICTED: monocarboxylate transporter 1-like isoform X1 [Solenopsis invicta]	663	155	74	139	101	155	113	117	128	209	82	190	262	295	85
CrematogasterSubCLCMeta_rep_c466	ref|XP_018046138.1| PREDICTED: protein PRRC2C isoform X8 [Atta colombica]	1954	1479	2159	3542	1932	1086	2223	1627	3155	735	1549	1404	2406	2505	1914
CrematogasterSubCLCMeta_rep_c467	ref|XP_011159178.1| PREDICTED: xaa-Pro aminopeptidase 1 [Solenopsis invicta]	0	150	479	18	219	482	80	286	0	0	292	362	549	178	596
CrematogasterSubCLCMeta_rep_c468	ref|XP_011863591.1| PREDICTED: gametogenetin-binding protein 2-like isoform X1 [Vollenhovia emeryi]	335	516	390	492	302	688	192	252	156	195	1054	574	499	141	434
CrematogasterSubCLCMeta_rep_c469	ref|XP_018396313.1| PREDICTED: probable multidrug resistance-associated protein lethal(2)03659 [Cyphomyrmex costatus]	1500	2208	4687	2551	2669	372	2577	988	1686	1561	1005	3897	1773	2330	5640
CrematogasterSubCLCMeta_rep_c470	ref|XP_011051433.1| PREDICTED: uncharacterized protein LOC105144299 [Acromyrmex echinatior]	7481	3541	1852	5936	5194	1027	4540	9718	7187	4192	1559	4802	6230	1582	2420
CrematogasterSubCLCMeta_rep_c471	ref|XP_011635841.1| PREDICTED: histone H3.3 [Pogonomyrmex barbatus]	447	536	412	835	981	340	953	570	805	690	1818	140	753	402	570
CrematogasterSubCLCMeta_rep_c472	ref|XP_018314250.1| PREDICTED: uncharacterized protein LOC108729577 [Trachymyrmex zeteki]	215	381	302	298	237	1234	309	218	323	178	359	408	328	349	342
CrematogasterSubCLCMeta_rep_c473	ref|XP_018364110.1| PREDICTED: fat-like cadherin-related tumor suppressor homolog, partial [Trachymyrmex cornetzi]	251	236	182	294	188	226	263	257	243	271	192	103	241	133	266
CrematogasterSubCLCMeta_rep_c474	ref|XP_011166209.1| PREDICTED: protein trachealess isoform X2 [Solenopsis invicta]	15	25	48	0	29	105	22	4	43	0	43	15	21	0	32
CrematogasterSubCLCMeta_rep_c475	ref|XP_018365605.1| PREDICTED: intersectin-1 isoform X9 [Trachymyrmex cornetzi]	622	755	1067	482	1012	1144	952	676	1081	671	1194	1193	1179	864	911
CrematogasterSubCLCMeta_rep_c476	ref|XP_020294575.1| ATP synthase subunit beta, mitochondrial [Pseudomyrmex gracilis]	7073	7580	7967	10201	7613	9538	6583	9267	7818	7538	4489	8349	8274	11652	9475
CrematogasterSubCLCMeta_rep_c477	ref|XP_011698443.1| PREDICTED: ATP-binding cassette sub-family B member 10, mitochondrial-like [Wasmannia auropunctata]	955	621	803	727	922	1054	796	723	890	846	1859	699	985	858	870
CrematogasterSubCLCMeta_c478	ref|XP_011135173.1| PREDICTED: uncharacterized protein LOC105180667 [Harpegnathos saltator]	0	27	4	4	11	892	37	9	10	0	0	22	17	11	43
CrematogasterSubCLCMeta_rep_c479	ref|XP_012534710.1| PREDICTED: F-box only protein 32 [Monomorium pharaonis]	410	170	185	218	224	275	291	269	271	0	244	118	234	66	243
CrematogasterSubCLCMeta_rep_c480	ref|XP_011866777.1| PREDICTED: uncharacterized protein LOC105561421 isoform X5 [Vollenhovia emeryi]	333	806	1397	361	204	1742	127	134	107	381	681	876	162	686	1262
CrematogasterSubCLCMeta_rep_c481	ref|XP_018049919.1| PREDICTED: WD repeat-containing protein 44 isoform X1 [Atta colombica]	0	18	103	0	0	226	0	0	0	0	41	23	0	0	0
CrematogasterSubCLCMeta_rep_c482	ref|XP_011877110.1| PREDICTED: uncharacterized protein LOC105567129 isoform X2 [Vollenhovia emeryi]	523	497	567	675	516	1114	610	515	899	668	1636	325	793	380	771
CrematogasterSubCLCMeta_rep_c483	ref|XP_011170437.1| PREDICTED: tRNA-splicing endonuclease subunit Sen15-like [Solenopsis invicta]	0	142	0	4	0	845	0	0	0	10	0	62	0	0	39
CrematogasterSubCLCMeta_rep_c484	ref|XP_018301414.1| PREDICTED: serine/threonine-protein kinase N isoform X3 [Trachymyrmex zeteki]	839	295	774	1152	248	9	1322	204	1510	129	2316	57	2252	505	356
CrematogasterSubCLCMeta_rep_c485	ref|XP_011862348.1| PREDICTED: inactive hydroxysteroid dehydrogenase-like protein 1 [Vollenhovia emeryi]	302	499	310	67	162	230	109	85	85	93	155	145	118	133	211
CrematogasterSubCLCMeta_rep_c486	ref|XP_011158821.1| PREDICTED: Down syndrome cell adhesion molecule-like protein Dscam2 [Solenopsis invicta]	58	408	143	50	549	350	656	28	474	59	508	223	37	44	494
CrematogasterSubCLCMeta_rep_c487	ref|XP_018395082.1| PREDICTED: uncharacterized protein LOC108773686 [Cyphomyrmex costatus]	82	503	265	429	693	752	923	184	1101	117	853	471	398	181	715
CrematogasterSubCLCMeta_rep_c488	ref|XP_011068765.1| PREDICTED: huntingtin isoform X3 [Acromyrmex echinatior]	1256	1108	1214	979	1029	1730	994	868	1140	636	1615	1208	994	935	1308
CrematogasterSubCLCMeta_rep_c490	ref|XP_011696937.1| PREDICTED: translation elongation factor 2 [Wasmannia auropunctata]	10465	57	35186	445	0	1524	157	0	0	7988	0	10756	0	33928	601
CrematogasterSubCLCMeta_rep_c491	ref|XP_012530058.1| PREDICTED: semaphorin-2A isoform X3 [Monomorium pharaonis]	40	150	69	37	135	142	196	27	162	40	118	140	96	249	154
CrematogasterSubCLCMeta_rep_c492	ref|XP_012530268.1| PREDICTED: neutral ceramidase [Monomorium pharaonis]	54	74	11	8	97	151	53	5	135	39	103	63	632	61	88
CrematogasterSubCLCMeta_c493	ref|XP_012528381.1| PREDICTED: transcription factor 25 [Monomorium pharaonis]	1676	1286	2043	2119	1543	1945	1967	1924	2145	2859	2524	2050	2395	2206	2250
CrematogasterSubCLCMeta_rep_c494	ref|XP_011861782.1| PREDICTED: spastin isoform X2 [Vollenhovia emeryi]	161	383	173	64	324	153	271	193	238	86	428	161	211	174	248
CrematogasterSubCLCMeta_rep_c495	ref|XP_011647797.1| PREDICTED: protein Wnt-11b-1-like [Pogonomyrmex barbatus]	0	51	1	15	44	43	28	0	18	0	13	69	63	0	257
CrematogasterSubCLCMeta_rep_c496	ref|XP_011687417.1| PREDICTED: uncharacterized protein LOC105449732 [Wasmannia auropunctata]	30	193	376	45	13	20	18	21	17	96	0	103	8	37	323
CrematogasterSubCLCMeta_rep_c497	ref|XP_018394588.1| PREDICTED: protein glass-like [Cyphomyrmex costatus]	153	516	341	269	329	469	475	172	402	266	386	391	374	345	360
CrematogasterSubCLCMeta_rep_c498	ref|XP_011872454.1| PREDICTED: uncharacterized protein LOC105564587 isoform X1 [Vollenhovia emeryi]	74	125	100	111	69	160	105	60	113	81	43	71	125	99	126
CrematogasterSubCLCMeta_rep_c499	ref|XP_018306982.1| PREDICTED: LOW QUALITY PROTEIN: homeotic protein distal-less-like [Trachymyrmex zeteki]	0	56	55	104	34	32	58	28	53	3	68	25	7	60	11
CrematogasterSubCLCMeta_rep_c500	ref|XP_018311260.1| PREDICTED: glyoxylate reductase/hydroxypyruvate reductase [Trachymyrmex zeteki]	444	176	170	214	405	58	277	493	440	302	395	398	252	208	251
CrematogasterSubCLCMeta_rep_c501	ref|XP_018311260.1| PREDICTED: glyoxylate reductase/hydroxypyruvate reductase [Trachymyrmex zeteki]	202	509	827	294	514	427	484	543	479	614	908	495	502	394	408
CrematogasterSubCLCMeta_rep_c502	ref|XP_011879432.1| PREDICTED: uncharacterized protein LOC105568395 isoform X1 [Vollenhovia emeryi]	78	122	79	185	121	82	98	79	147	51	57	46	367	109	213
CrematogasterSubCLCMeta_c503	ref|XP_011875344.1| PREDICTED: tyrosine-protein phosphatase non-receptor type 4 isoform X2 [Vollenhovia emeryi]	758	689	854	816	500	856	732	554	787	652	1013	730	862	858	778
CrematogasterSubCLCMeta_rep_c504	ref|XP_011176335.1| PREDICTED: ribonuclease H2 subunit A [Solenopsis invicta]	1934	1475	2952	2679	2913	156	3883	827	2932	2274	2941	1089	593	1438	2171
CrematogasterSubCLCMeta_rep_c505	ref|XP_011866510.1| PREDICTED: nucleoside diphosphate kinase [Vollenhovia emeryi]	1598	368	682	1202	1157	1071	1610	1930	1489	1264	617	801	1509	559	332
CrematogasterSubCLCMeta_rep_c506	ref|XP_011882322.1| PREDICTED: uncharacterized protein LOC105570021 isoform X1 [Vollenhovia emeryi]	962	1974	2321	317	444	1047	211	344	778	73	757	2927	280	2705	2910
CrematogasterSubCLCMeta_rep_c507	ref|XP_012540331.1| PREDICTED: dnaJ homolog subfamily C member 7 [Monomorium pharaonis]	179	190	335	271	223	672	238	183	217	266	294	318	207	355	398
CrematogasterSubCLCMeta_rep_c508	ref|XP_011884055.1| PREDICTED: uncharacterized protein LOC105571191, partial [Vollenhovia emeryi]	184	295	345	204	372	168	482	109	434	54	285	150	655	149	288
CrematogasterSubCLCMeta_rep_c509	ref|XP_012525747.1| PREDICTED: ruvB-like 2 [Monomorium pharaonis]	80	9	73	0	41	54	24	0	10	173	90	75	18	0	98
CrematogasterSubCLCMeta_rep_c510	ref|XP_011064018.1| PREDICTED: MIP18 family protein CG7949 [Acromyrmex echinatior]	341	211	313	200	260	382	325	233	273	270	214	306	234	284	363
CrematogasterSubCLCMeta_rep_c511	ref|XP_011061640.1| PREDICTED: chaoptin-like [Acromyrmex echinatior]	4	66	11	6	197	195	225	3	291	0	231	98	27	0	109
CrematogasterSubCLCMeta_rep_c512	ref|XP_011879975.1| PREDICTED: heterogeneous nuclear ribonucleoprotein K [Vollenhovia emeryi]	712	855	783	1430	1225	2068	1100	1189	944	943	1019	960	1330	1080	1631
CrematogasterSubCLCMeta_rep_c513	ref|XP_011879975.1| PREDICTED: heterogeneous nuclear ribonucleoprotein K [Vollenhovia emeryi]	2252	1662	1997	3181	2257	1293	2394	2506	1883	2817	1853	1686	2267	1771	2046
CrematogasterSubCLCMeta_rep_c514	ref|XP_011877267.1| PREDICTED: inositol polyphosphate 5-phosphatase OCRL-1 [Vollenhovia emeryi]	426	409	570	393	692	670	639	379	557	465	737	724	446	586	562
CrematogasterSubCLCMeta_rep_c515	ref|XP_011689009.1| PREDICTED: focadhesin isoform X1 [Wasmannia auropunctata]	261	416	321	275	307	237	319	242	306	128	670	312	368	312	310
CrematogasterSubCLCMeta_rep_c516	ref|XP_011872033.1| PREDICTED: microtubule-associated protein futsch [Vollenhovia emeryi]	43	198	19	12	131	398	163	13	300	0	255	89	54	10	332
CrematogasterSubCLCMeta_rep_c517	ref|XP_011876527.1| PREDICTED: meiosis arrest female protein 1 homolog isoform X5 [Vollenhovia emeryi]	615	598	598	362	541	827	540	453	679	426	528	433	697	460	668
CrematogasterSubCLCMeta_rep_c518	ref|XP_011880354.1| PREDICTED: twitchin isoform X49 [Vollenhovia emeryi]	29595	979	926	26874	15761	12479	25183	25843	23419	30283	7862	529	21361	1764	1499
CrematogasterSubCLCMeta_rep_c519	ref|XP_011156446.1| PREDICTED: vacuolar protein sorting-associated protein 53 homolog [Solenopsis invicta]	250	1263	2471	299	126	2127	258	178	255	131	314	1472	122	103	1134
CrematogasterSubCLCMeta_rep_c520	ref|XP_011877453.1| PREDICTED: protein transport protein Sec23A isoform X2 [Vollenhovia emeryi]	3158	2585	2707	2734	2584	2504	3041	2732	2313	2074	2199	2377	2847	2052	2488
CrematogasterSubCLCMeta_rep_c521	ref|XP_011866434.1| PREDICTED: protein FAM214A [Vollenhovia emeryi]	1374	1214	1335	1178	1643	1877	1375	1246	1496	1551	1987	1598	1246	1118	1431
CrematogasterSubCLCMeta_rep_c522	ref|XP_011866308.1| PREDICTED: anoctamin-4 isoform X1 [Vollenhovia emeryi]	2454	348	2314	2520	1762	2365	1816	2096	2033	1953	1087	437	1969	407	308
CrematogasterSubCLCMeta_rep_c523	ref|XP_011872358.1| PREDICTED: 4-coumarate--CoA ligase 1-like [Vollenhovia emeryi]	1422	1016	224	222	872	151	733	778	255	149	1376	129	742	149	378
CrematogasterSubCLCMeta_rep_c524	ref|XP_011879328.1| PREDICTED: phospholipase D3-like isoform X1 [Vollenhovia emeryi]	29	153	155	33	57	247	89	71	57	22	43	167	81	113	219
CrematogasterSubCLCMeta_rep_c525	ref|XP_012535363.1| PREDICTED: nuclear pore complex protein Nup133 isoform X1 [Monomorium pharaonis]	525	343	290	1043	606	66	604	684	667	458	825	285	920	287	607
CrematogasterSubCLCMeta_rep_c526	ref|XP_011169342.1| PREDICTED: cdc42 homolog isoform X3 [Solenopsis invicta]	247	243	99	88	137	221	158	134	147	122	260	52	247	199	164
CrematogasterSubCLCMeta_rep_c527	ref|XP_011049812.1| PREDICTED: uncharacterized protein LOC105143288 [Acromyrmex echinatior]	63	65	69	53	33	96	48	63	123	43	9	79	75	64	113
CrematogasterSubCLCMeta_rep_c528	ref|XP_018360645.1| PREDICTED: microtubule-associated protein futsch-like isoform X6 [Trachymyrmex cornetzi]	461	0	595	722	159	2217	0	306	0	748	68	0	541	0	0
CrematogasterSubCLCMeta_rep_c529	ref|XP_011162434.1| PREDICTED: cleavage and polyadenylation specificity factor subunit 1 [Solenopsis invicta]	307	124	374	0	237	449	0	123	241	143	455	250	286	86	72
CrematogasterSubCLCMeta_rep_c530	ref|XP_011882419.1| PREDICTED: DNA replication licensing factor Mcm7 [Vollenhovia emeryi]	8	28	19	13	0	1	32	18	28	1	32	39	40	189	26
CrematogasterSubCLCMeta_rep_c531	ref|XP_018312242.1| PREDICTED: N-acetyltransferase ESCO1 [Trachymyrmex zeteki]	86	26	166	33	223	141	191	64	130	182	105	45	154	0	38
CrematogasterSubCLCMeta_rep_c532	ref|XP_014474378.1| PREDICTED: mitogen-activated protein kinase kinase kinase MLK4-like isoform X1 [Dinoponera quadriceps]	606	400	760	583	641	1110	821	697	701	833	1372	853	781	583	779
CrematogasterSubCLCMeta_rep_c533	ref|XP_011876238.1| PREDICTED: vang-like protein 2 [Vollenhovia emeryi]	228	112	260	269	229	354	270	136	246	175	524	336	257	218	291
CrematogasterSubCLCMeta_rep_c534	ref|XP_021925803.1| type I inositol 1,4,5-trisphosphate 5-phosphatase isoform X2 [Zootermopsis nevadensis]	150	61	124	39	73	268	94	123	130	13	23	79	106	178	115
CrematogasterSubCLCMeta_rep_c535	#N/A	20	8	21	24	44	34	31	12	15	48	30	13	30	31	47
CrematogasterSubCLCMeta_rep_c536	ref|XP_019885854.1| PREDICTED: uncharacterized protein LOC109610707 [Ooceraea biroi]	10	61	44	9	11	0	42	1	6	0	49	18	87	5	28
CrematogasterSubCLCMeta_c537	ref|XP_011635905.1| PREDICTED: T-complex protein 1 subunit eta [Pogonomyrmex barbatus]	1492	1262	1751	1499	1163	1509	1360	1452	1363	1466	2145	1587	2002	1605	1280
CrematogasterSubCLCMeta_rep_c538	ref|XP_011703182.1| PREDICTED: retinol dehydrogenase 12-like [Wasmannia auropunctata]	1162	865	597	1445	824	2120	809	1211	988	367	548	801	580	606	787
CrematogasterSubCLCMeta_rep_c539	ref|XP_011883379.1| PREDICTED: 40S ribosomal protein S15Aa [Vollenhovia emeryi]	0	0	3	2	7	3	17	3	3	2	4	1	2	2	2
CrematogasterSubCLCMeta_rep_c540	ref|XP_018307617.1| PREDICTED: uncharacterized protein LOC108725227 [Trachymyrmex zeteki]	192	118	46	115	75	33	126	6	38	0	23	324	107	9	42
CrematogasterSubCLCMeta_rep_c541	ref|XP_012530512.1| PREDICTED: prostate stem cell antigen [Monomorium pharaonis]	257	52	71	143	70	0	0	40	0	100	63	56	182	0	20
CrematogasterSubCLCMeta_rep_c542	ref|XP_012530512.1| PREDICTED: prostate stem cell antigen [Monomorium pharaonis]	46	53	306	11	35	328	30	15	36	26	24	144	116	272	182
CrematogasterSubCLCMeta_rep_c543	ref|XP_011882468.1| PREDICTED: transcriptional repressor CTCF-like [Vollenhovia emeryi]	30	0	6	24	45	10	54	30	45	22	90	50	52	1	21
CrematogasterSubCLCMeta_c544	ref|XP_011870376.1| PREDICTED: RWD domain-containing protein 2A [Vollenhovia emeryi]	723	350	456	987	801	317	839	1127	1165	576	487	328	201	277	347
CrematogasterSubCLCMeta_rep_c545	ref|XP_011879576.1| PREDICTED: uncharacterized protein LOC105568481 [Vollenhovia emeryi]	78	112	157	206	50	227	81	32	186	2	80	116	146	188	164
CrematogasterSubCLCMeta_rep_c546	#N/A	40	47	114	2	47	49	13	21	21	52	64	59	168	16	18
CrematogasterSubCLCMeta_rep_c547	ref|XP_018363779.1| PREDICTED: phosphatidylinositol 4,5-bisphosphate 3-kinase catalytic subunit delta isoform [Trachymyrmex cornetzi]	654	573	442	609	558	404	601	569	716	677	837	528	671	591	598
CrematogasterSubCLCMeta_rep_c548	ref|XP_011645671.1| PREDICTED: protein tincar [Pogonomyrmex barbatus]	19	47	54	0	41	47	37	23	41	0	65	8	107	15	66
CrematogasterSubCLCMeta_rep_c549	ref|XP_011167391.1| PREDICTED: sodium/potassium-transporting ATPase subunit beta-2 [Solenopsis invicta]	719	2484	1076	1440	2362	1122	3079	694	3446	796	2803	2254	1709	1485	2502
CrematogasterSubCLCMeta_rep_c550	ref|XP_002154678.3| PREDICTED: erythroid differentiation-related factor 1-like [Hydra vulgaris]	112	69	3	171	94	5	226	111	140	64	40	16	90	117	124
CrematogasterSubCLCMeta_rep_c551	ref|XP_011166716.1| PREDICTED: DNA repair endonuclease XPF isoform X2 [Solenopsis invicta]	977	464	648	1166	1131	284	1243	850	1431	1106	1397	574	1339	735	658
CrematogasterSubCLCMeta_rep_c552	ref|XP_011163771.1| PREDICTED: DNA repair protein XRCC4-like [Solenopsis invicta]	10	119	120	0	19	58	0	6	3	52	27	144	12	200	157
CrematogasterSubCLCMeta_rep_c553	ref|XP_019700569.1| PREDICTED: uncharacterized protein LOC109504588 [Harpegnathos saltator]	3557	6045	7836	3484	4650	713	5374	3191	6826	2595	3389	10004	2970	3281	9438
CrematogasterSubCLCMeta_rep_c554	ref|XP_011865786.1| PREDICTED: pikachurin [Vollenhovia emeryi]	13	108	50	133	109	298	175	57	305	76	376	76	50	97	242
CrematogasterSubCLCMeta_rep_c555	ref|XP_011160374.1| PREDICTED: zinc finger CCCH domain-containing protein 18-like isoform X3 [Solenopsis invicta]	4432	3965	5360	5517	4525	7661	4131	3964	4072	5148	4762	4765	3777	4947	5240
CrematogasterSubCLCMeta_rep_c556	ref|XP_018302564.1| PREDICTED: proton-coupled folate transporter isoform X1 [Trachymyrmex zeteki]	1431	1304	1448	1044	1378	1835	1298	1330	1513	986	3544	1308	1657	1296	1535
CrematogasterSubCLCMeta_rep_c557	ref|XP_018315981.1| PREDICTED: nose resistant to fluoxetine protein 6 [Trachymyrmex zeteki]	2466	2141	3916	3420	2828	4169	2538	2265	3871	2527	2961	2773	3404	3544	3193
CrematogasterSubCLCMeta_rep_c558	ref|XP_018301107.1| PREDICTED: irregular chiasm C-roughest protein-like [Trachymyrmex zeteki]	33	123	168	0	197	305	218	68	328	68	283	115	202	1	227
CrematogasterSubCLCMeta_c559	ref|XP_018370897.1| PREDICTED: circadian locomoter output cycles protein kaput [Trachymyrmex cornetzi]	251	238	269	205	277	729	464	380	354	167	209	277	186	305	253
CrematogasterSubCLCMeta_rep_c560	ref|XP_011868564.1| PREDICTED: uncharacterized protein LOC105562381 [Vollenhovia emeryi]	902	1257	2033	1201	598	795	778	805	867	1657	545	1524	997	2532	1723
CrematogasterSubCLCMeta_rep_c561	ref|XP_011159615.1| PREDICTED: uncharacterized protein LOC105195746 [Solenopsis invicta]	96	31	31	74	102	86	166	69	22	207	30	97	82	110	60
CrematogasterSubCLCMeta_rep_c562	ref|XP_018316406.1| PREDICTED: uncharacterized protein LOC108730929 isoform X1 [Trachymyrmex zeteki]	13	36	74	120	74	71	80	77	72	52	193	38	66	14	94
CrematogasterSubCLCMeta_rep_c563	ref|XP_018364190.1| PREDICTED: protein giant-lens [Trachymyrmex cornetzi]	47	42	44	0	33	206	57	24	185	0	424	26	53	41	23
CrematogasterSubCLCMeta_rep_c564	ref|XP_011158786.1| PREDICTED: uncharacterized protein LOC105195192 [Solenopsis invicta]	108	44	208	23	74	53	56	46	79	0	185	185	53	34	87
CrematogasterSubCLCMeta_rep_c565	ref|XP_011882606.1| PREDICTED: protein FAM135A isoform X3 [Vollenhovia emeryi]	81	225	36	39	247	352	383	43	409	49	342	120	115	18	396
CrematogasterSubCLCMeta_rep_c566	ref|XP_011166823.1| PREDICTED: muscle M-line assembly protein unc-89 isoform X1 [Solenopsis invicta]	769	440	257	232	585	61	980	710	436	422	1226	339	547	346	360
CrematogasterSubCLCMeta_rep_c567	ref|XP_011882027.1| PREDICTED: acetylcholine receptor subunit alpha-like isoform X1 [Vollenhovia emeryi]	6	76	2	10	129	224	101	11	172	0	131	73	7	0	129
CrematogasterSubCLCMeta_rep_c568	ref|XP_018057505.1| PREDICTED: amyloid protein-binding protein 2 isoform X1 [Atta colombica]	748	555	852	829	762	834	459	866	840	644	846	900	1007	789	580
CrematogasterSubCLCMeta_c569	ref|XP_011883090.1| PREDICTED: cleavage and polyadenylation specificity factor subunit 6 isoform X2 [Vollenhovia emeryi]	13	15	101	87	160	448	85	34	69	311	155	54	119	6	79
CrematogasterSubCLCMeta_rep_c570	ref|XP_018058138.1| PREDICTED: uncharacterized protein LOC108693616 [Atta colombica]	0	13	20	26	20	47	29	51	52	0	242	7	0	0	54
CrematogasterSubCLCMeta_rep_c571	ref|XP_011690241.1| PREDICTED: sushi, von Willebrand factor type A, EGF and pentraxin domain-containing protein 1-like [Wasmannia auropunctata]	1258	1542	1509	1981	2091	2300	2956	1043	2609	1402	1526	1286	2072	1470	1998
CrematogasterSubCLCMeta_rep_c572	ref|XP_011695708.1| PREDICTED: zinc finger and SCAN domain-containing protein 12-like [Wasmannia auropunctata]	0	25	3	0	42	141	76	1	139	0	119	27	12	0	97
CrematogasterSubCLCMeta_c573	ref|XP_018301159.1| PREDICTED: uncharacterized protein LOC108721234 isoform X2 [Trachymyrmex zeteki]	309	381	344	400	341	362	189	230	233	118	493	317	941	338	431
CrematogasterSubCLCMeta_rep_c574	ref|XP_018401451.1| PREDICTED: cell growth regulator with RING finger domain protein 1-like [Cyphomyrmex costatus]	209	139	137	174	137	641	144	239	226	290	1550	102	283	169	166
CrematogasterSubCLCMeta_rep_c575	ref|XP_018311370.1| PREDICTED: splicing factor 3B subunit 2 [Trachymyrmex zeteki]	270	260	520	349	408	431	417	245	316	298	627	245	251	503	324
CrematogasterSubCLCMeta_rep_c576	ref|XP_011875319.1| PREDICTED: WW domain-containing oxidoreductase [Vollenhovia emeryi]	1478	616	400	1351	1173	1	1039	1171	1160	523	1072	667	1035	656	601
CrematogasterSubCLCMeta_rep_c577	#N/A	328	187	206	348	425	683	259	224	186	115	121	271	280	182	196
CrematogasterSubCLCMeta_rep_c578	ref|XP_018299929.1| PREDICTED: glycogen phosphorylase [Trachymyrmex zeteki]	2115	984	1777	1269	1419	2706	967	3075	3121	1880	1462	1038	1853	1337	1224
CrematogasterSubCLCMeta_rep_c579	ref|XP_020291641.1| gamma-aminobutyric acid receptor-associated protein [Pseudomyrmex gracilis]	28	0	0	0	31	2826	27	0	17	43	0	62	26	70	36
CrematogasterSubCLCMeta_rep_c580	#N/A	149	123	206	255	204	271	258	160	195	75	200	242	172	242	157
CrematogasterSubCLCMeta_rep_c581	ref|XP_011171309.1| PREDICTED: filamin-A [Solenopsis invicta]	248	648	947	433	911	1410	204	668	459	953	741	731	1389	1065	791
CrematogasterSubCLCMeta_rep_c582	#N/A	0	16	0	0	0	0	0	1	1	0	0	6	0	0	0
CrematogasterSubCLCMeta_rep_c583	ref|XP_012538466.1| PREDICTED: probable low-specificity L-threonine aldolase 2 isoform X1 [Monomorium pharaonis]	1311	38	264	31	318	98	463	44	335	409	82	210	413	3	34
CrematogasterSubCLCMeta_rep_c584	ref|XP_011639661.1| PREDICTED: uncharacterized protein LOC105428831 [Pogonomyrmex barbatus]	59	42	127	46	152	71	63	83	159	0	107	37	110	17	144
CrematogasterSubCLCMeta_c585	ref|XP_018392860.1| PREDICTED: glutaryl-CoA dehydrogenase, mitochondrial [Cyphomyrmex costatus]	971	340	195	127	426	192	540	62	174	161	679	146	885	246	93
CrematogasterSubCLCMeta_rep_c586	ref|XP_011872271.1| PREDICTED: uncharacterized protein LOC105564486 isoform X2 [Vollenhovia emeryi]	26	61	221	38	58	245	30	51	53	240	103	51	75	196	173
CrematogasterSubCLCMeta_rep_c587	ref|XP_018339584.1| PREDICTED: furin-like protease 2 isoform X1 [Trachymyrmex septentrionalis]	165	507	1735	772	269	703	71	720	0	152	25	728	118	644	982
CrematogasterSubCLCMeta_rep_c588	ref|XP_011643206.1| PREDICTED: ankyrin-1-like isoform X2 [Pogonomyrmex barbatus]	90	36	120	64	14	595	13	18	16	42	60	75	36	100	36
CrematogasterSubCLCMeta_rep_c589	ref|XP_011862848.1| PREDICTED: peroxisomal membrane protein PEX16 [Vollenhovia emeryi]	98	628	966	180	191	284	407	82	214	74	153	576	201	814	436
CrematogasterSubCLCMeta_rep_c590	ref|XP_018359656.1| PREDICTED: UPF0518 protein AAEL005291-like isoform X2 [Trachymyrmex cornetzi]	1346	391	705	1239	1074	1941	944	773	1322	915	1651	983	810	1027	825
CrematogasterSubCLCMeta_rep_c591	ref|XP_011873094.1| PREDICTED: teneurin-a isoform X2 [Vollenhovia emeryi]	367	230	190	337	509	584	586	334	413	175	999	291	213	179	836
CrematogasterSubCLCMeta_c592	ref|XP_018351052.1| PREDICTED: potassium voltage-gated channel protein eag isoform X2 [Trachymyrmex septentrionalis]	69	171	36	119	172	242	260	156	347	81	335	72	164	53	268
CrematogasterSubCLCMeta_rep_c593	ref|XP_012524238.1| PREDICTED: DNA-binding protein RFX2 isoform X1 [Monomorium pharaonis]	51	116	151	226	222	38	203	115	163	132	167	200	139	170	178
CrematogasterSubCLCMeta_rep_c594	ref|XP_012061413.1| PREDICTED: eukaryotic translation initiation factor 2-alpha kinase 1-like, partial [Atta cephalotes]	85	6	60	89	104	421	48	54	114	189	79	49	106	0	25
CrematogasterSubCLCMeta_rep_c595	ref|XP_011859798.1| PREDICTED: NADH-ubiquinone oxidoreductase 20 kDa subunit-like [Vollenhovia emeryi]	901	1021	1908	715	5405	889	550	626	4275	1054	3098	1470	4931	1213	1279
CrematogasterSubCLCMeta_rep_c596	ref|XP_012062232.1| PREDICTED: ras-interacting protein RIP3, partial [Atta cephalotes]	0	35	57	17	3	1	11	25	21	19	58	19	42	14	37
CrematogasterSubCLCMeta_rep_c597	ref|XP_011268522.1| PREDICTED: ADP,ATP carrier protein 2 [Camponotus floridanus]	0	0	9	7	17	3	24	13	2	7	5	4	10	16	3
CrematogasterSubCLCMeta_rep_c598	ref|XP_011164650.1| PREDICTED: uncharacterized protein LOC105199317 [Solenopsis invicta]	25	407	205	51	7	369	55	26	90	0	64	161	16	67	216
CrematogasterSubCLCMeta_rep_c599	ref|XP_011870223.1| PREDICTED: uncharacterized protein LOC105563329 isoform X1 [Vollenhovia emeryi]	0	126	0	0	31	43	155	2	113	0	96	42	0	0	70
CrematogasterSubCLCMeta_rep_c600	ref|XP_011699910.1| PREDICTED: tetratricopeptide repeat protein 4 isoform X2 [Wasmannia auropunctata]	71	81	140	52	53	134	134	59	69	55	411	44	68	44	59
CrematogasterSubCLCMeta_rep_c601	ref|XP_011700418.1| PREDICTED: WD repeat-containing protein 63-like [Wasmannia auropunctata]	220	181	198	242	458	60	433	202	270	185	284	142	239	320	211
CrematogasterSubCLCMeta_rep_c602	ref|XP_012060761.1| PREDICTED: uncharacterized protein LOC105624000 [Atta cephalotes]	6	44	13	64	79	80	61	20	74	0	34	81	92	168	352
CrematogasterSubCLCMeta_c603	ref|XP_011881505.1| PREDICTED: rab5 GDP/GTP exchange factor [Vollenhovia emeryi]	639	970	669	1037	888	0	279	282	550	160	1076	1417	470	940	1172
CrematogasterSubCLCMeta_rep_c604	ref|XP_011251524.1| PREDICTED: phytanoyl-CoA dioxygenase, peroxisomal [Camponotus floridanus]	0	0	16	10	32	2	18	31	20	7	11	22	4	7	19
CrematogasterSubCLCMeta_rep_c605	ref|XP_011140260.1| PREDICTED: rhomboid-related protein 2 [Harpegnathos saltator]	19	77	46	24	160	218	162	12	254	0	157	67	61	3	171
CrematogasterSubCLCMeta_rep_c606	ref|XP_011869843.1| PREDICTED: mitogen-activated protein kinase kinase kinase 11-like [Vollenhovia emeryi]	0	30	36	0	45	85	86	21	86	53	71	34	45	0	7
CrematogasterSubCLCMeta_rep_c607	ref|XP_018055071.1| PREDICTED: neuroligin-1-like [Atta colombica]	0	131	1	7	119	91	142	15	122	7	133	95	11	12	118
CrematogasterSubCLCMeta_c608	ref|XP_011865306.1| PREDICTED: alpha-catulin isoform X1 [Vollenhovia emeryi]	35	319	18	102	320	209	440	74	576	0	493	45	103	83	526
CrematogasterSubCLCMeta_rep_c609	ref|XP_018407198.1| PREDICTED: RRP12-like protein [Cyphomyrmex costatus]	125	129	89	123	101	229	254	212	155	85	2100	109	259	138	139
CrematogasterSubCLCMeta_rep_c610	ref|XP_012540735.1| PREDICTED: protein Hook homolog 3 [Monomorium pharaonis]	584	639	1046	741	590	944	397	337	455	644	492	1045	382	954	1097
CrematogasterSubCLCMeta_rep_c611	ref|XP_018344039.1| PREDICTED: microtubule-associated protein futsch-like isoform X11 [Trachymyrmex septentrionalis]	2692	1299	3022	2334	2850	1336	2217	2026	1930	1678	4610	1993	2981	2128	3043
CrematogasterSubCLCMeta_rep_c612	ref|XP_012533720.1| PREDICTED: protein wntless [Monomorium pharaonis]	159	161	121	157	186	231	133	56	152	90	168	147	159	219	122
CrematogasterSubCLCMeta_c613	ref|XP_011698850.1| PREDICTED: vacuolar protein sorting-associated protein 8 homolog isoform X1 [Wasmannia auropunctata]	175	253	193	212	140	458	177	213	184	41	165	327	222	284	361
CrematogasterSubCLCMeta_rep_c614	ref|XP_018343821.1| PREDICTED: basement membrane-specific heparan sulfate proteoglycan core protein isoform X4 [Trachymyrmex septentrionalis]	4899	2125	4421	4232	4340	2778	3081	5480	6280	3051	4729	2689	7869	2989	2242
CrematogasterSubCLCMeta_rep_c615	ref|XP_020289660.1| serine/threonine-protein kinase tricorner isoform X3 [Pseudomyrmex gracilis]	50	40	62	103	69	62	104	54	80	84	183	39	72	43	83
CrematogasterSubCLCMeta_rep_c616	ref|XP_012526859.1| PREDICTED: dolichyl-diphosphooligosaccharide--protein glycosyltransferase subunit STT3B isoform X1 [Monomorium pharaonis]	0	22	90	187	0	929	0	122	85	425	96	0	94	0	140
CrematogasterSubCLCMeta_c617	ref|XP_018051780.1| PREDICTED: LOW QUALITY PROTEIN: uncharacterized protein LOC108689512 [Atta colombica]	26	76	50	32	0	261	6	6	28	53	17	35	0	160	81
CrematogasterSubCLCMeta_rep_c618	ref|XP_011159972.1| PREDICTED: voltage-dependent calcium channel type A subunit alpha-1 isoform X1 [Solenopsis invicta]	32	63	7	21	40	43	35	0	81	0	68	33	61	0	19
CrematogasterSubCLCMeta_rep_c619	ref|XP_011880270.1| PREDICTED: solute carrier family 41 member 1 isoform X1 [Vollenhovia emeryi]	37	26	110	0	35	56	49	16	70	1	74	51	397	9	95
CrematogasterSubCLCMeta_rep_c620	ref|XP_011873809.1| PREDICTED: spondin-1 isoform X5 [Vollenhovia emeryi]	192	427	746	286	270	664	429	135	363	3	171	566	167	538	326
CrematogasterSubCLCMeta_rep_c621	ref|XP_018059615.1| PREDICTED: cAMP-responsive element-binding protein-like 2 [Atta colombica]	37	69	64	54	40	44	52	13	17	29	154	41	22	24	26
CrematogasterSubCLCMeta_rep_c622	ref|XP_012228672.1| PREDICTED: uncharacterized protein LOC105675819 [Linepithema humile]	268	57	45	233	200	5	195	117	159	156	249	103	222	45	14
CrematogasterSubCLCMeta_rep_c623	ref|XP_018312649.1| PREDICTED: filamin-A isoform X6 [Trachymyrmex zeteki]	1	35	93	27	22	29	33	22	48	89	41	41	116	38	25
CrematogasterSubCLCMeta_rep_c624	ref|XP_018346736.1| PREDICTED: meiosis arrest female protein 1 homolog isoform X3 [Trachymyrmex septentrionalis]	0	121	125	71	22	218	78	35	95	101	90	48	65	24	70
CrematogasterSubCLCMeta_rep_c625	#N/A	3	15	7	52	27	10	53	27	51	65	79	12	26	1	38
CrematogasterSubCLCMeta_rep_c626	#N/A	7	1	5	0	3	54	31	9	41	0	14	6	4	0	28
CrematogasterSubCLCMeta_rep_c627	ref|XP_011863084.1| PREDICTED: lisH domain-containing protein ARMC9-like isoform X2 [Vollenhovia emeryi]	68	54	23	112	70	100	75	38	70	47	95	63	16	31	31
CrematogasterSubCLCMeta_c628	ref|XP_011634316.1| PREDICTED: ubiquitin-conjugating enzyme E2-17 kDa [Pogonomyrmex barbatus]	312	682	1694	541	337	68	857	698	728	1404	44	546	85	88	1197
CrematogasterSubCLCMeta_rep_c629	ref|XP_011702421.1| PREDICTED: venom serine protease 34-like isoform X4 [Wasmannia auropunctata]	105	65	125	214	341	1396	159	100	203	114	190	57	214	113	179
CrematogasterSubCLCMeta_c630	ref|XP_011062785.1| PREDICTED: translation initiation factor eIF-2B subunit beta [Acromyrmex echinatior]	412	539	713	272	389	703	305	304	316	255	922	404	346	645	310
CrematogasterSubCLCMeta_rep_c631	ref|XP_011859112.1| PREDICTED: uncharacterized protein LOC105556623 [Vollenhovia emeryi]	292	286	206	301	275	309	284	179	279	235	407	239	323	342	309
CrematogasterSubCLCMeta_rep_c632	ref|XP_018405146.1| PREDICTED: uridine phosphorylase 1 isoform X1 [Cyphomyrmex costatus]	1846	981	2483	1237	1780	2262	1530	1523	5453	1060	366	2414	2633	708	2537
CrematogasterSubCLCMeta_c633	#N/A	8	30	18	14	22	26	13	9	30	16	1	28	8	6	40
CrematogasterSubCLCMeta_rep_c634	ref|XP_011875897.1| PREDICTED: uncharacterized protein LOC105566470 isoform X1 [Vollenhovia emeryi]	1094	234	217	1189	1373	210	1126	975	1180	1398	9607	775	1532	788	896
CrematogasterSubCLCMeta_rep_c635	ref|XP_011864565.1| PREDICTED: ejaculatory bulb-specific protein 3-like [Vollenhovia emeryi]	294	492	1857	788	363	3717	284	355	352	450	285	625	804	1131	343
CrematogasterSubCLCMeta_rep_c636	ref|XP_011869180.1| PREDICTED: neutral alpha-glucosidase AB isoform X1 [Vollenhovia emeryi]	2418	2162	1637	2019	2278	1743	2150	2918	2111	1745	2116	1901	2264	1854	1714
CrematogasterSubCLCMeta_rep_c637	ref|XP_011685456.1| PREDICTED: uncharacterized protein LOC105448511 [Wasmannia auropunctata]	0	0	0	0	37	310	17	34	31	0	44	0	98	0	0
CrematogasterSubCLCMeta_c638	ref|XP_018394195.1| PREDICTED: mediator of RNA polymerase II transcription subunit 19 [Cyphomyrmex costatus]	454	329	270	577	450	0	325	345	481	97	637	525	286	497	526
CrematogasterSubCLCMeta_rep_c639	ref|XP_018361507.1| PREDICTED: uncharacterized protein LOC108760201 isoform X1 [Trachymyrmex cornetzi]	682	224	890	267	220	278	235	263	370	132	573	444	666	528	370
CrematogasterSubCLCMeta_rep_c640	ref|XP_011882553.1| PREDICTED: kinesin-like protein KIF14 isoform X2 [Vollenhovia emeryi]	84	18	59	43	58	47	24	24	30	20	0	43	7	34	36
CrematogasterSubCLCMeta_rep_c641	ref|XP_011173937.1| PREDICTED: uncharacterized protein LOC105206112 [Solenopsis invicta]	0	0	0	0	50	36	11	15	74	14	0	0	9	0	16
CrematogasterSubCLCMeta_c642	ref|XP_011700833.1| PREDICTED: protein suppressor of sable isoform X1 [Wasmannia auropunctata]	48	51	68	49	79	45	34	64	57	0	85	39	66	39	102
CrematogasterSubCLCMeta_c643	ref|XP_011168054.1| PREDICTED: uncharacterized protein LOC105201653 [Solenopsis invicta]	391	538	965	712	670	887	862	580	612	623	29644	1057	1015	649	840
CrematogasterSubCLCMeta_c644	ref|XP_011161369.1| PREDICTED: transcription elongation factor SPT5, partial [Solenopsis invicta]	91	95	173	57	40	1054	72	74	73	3	323	54	196	183	82
CrematogasterSubCLCMeta_c645	ref|XP_018371423.1| PREDICTED: 60S ribosomal protein L3 [Trachymyrmex cornetzi]	9453	7551	10622	10933	8002	8031	8478	12168	9809	8335	26343	10761	9185	6876	7832
CrematogasterSubCLCMeta_c646	#N/A	4	23	6	26	25	23	27	2	40	16	36	25	4	8	40
CrematogasterSubCLCMeta_rep_c647	ref|XP_012536884.1| PREDICTED: probable nuclear hormone receptor HR3 isoform X2 [Monomorium pharaonis]	0	43	13	18	30	22	65	1	31	0	50	30	19	0	56
CrematogasterSubCLCMeta_rep_c648	ref|XP_011862336.1| PREDICTED: solute carrier organic anion transporter family member 3A1 [Vollenhovia emeryi]	74	79	280	186	163	334	236	104	268	45	223	120	309	46	221
CrematogasterSubCLCMeta_rep_c649	ref|XP_018359642.1| PREDICTED: kin of IRRE-like protein 3 isoform X2 [Trachymyrmex cornetzi]	9	121	55	47	118	117	147	16	159	71	182	139	24	43	110
CrematogasterSubCLCMeta_rep_c650	ref|XP_011692270.1| PREDICTED: glyoxalase domain-containing protein 4 [Wasmannia auropunctata]	48	53	48	42	32	137	24	49	76	25	15	19	48	85	79
CrematogasterSubCLCMeta_c651	#N/A	303	389	6	171	167	2	253	608	209	199	67	162	680	160	103
CrematogasterSubCLCMeta_rep_c652	ref|XP_011881359.1| PREDICTED: uncharacterized protein LOC105569471 [Vollenhovia emeryi]	681	704	579	568	671	904	923	850	803	485	1120	835	821	437	2186
CrematogasterSubCLCMeta_rep_c653	ref|XP_018372792.1| PREDICTED: uncharacterized protein LOC108767404 isoform X1 [Trachymyrmex cornetzi]	96	86	65	87	77	17	79	47	65	138	103	61	62	55	76
CrematogasterSubCLCMeta_rep_c654	ref|XP_011695833.1| PREDICTED: zinc finger and BTB domain-containing protein 6 isoform X9 [Wasmannia auropunctata]	49	0	0	4	0	1494	0	0	26	98	2	0	0	0	0
CrematogasterSubCLCMeta_rep_c655	ref|XP_011695833.1| PREDICTED: zinc finger and BTB domain-containing protein 6 isoform X9 [Wasmannia auropunctata]	2365	3284	3856	3077	3407	2493	2127	2384	1942	985	2484	2576	2955	2977	4299
CrematogasterSubCLCMeta_c656	ref|XP_018406710.1| PREDICTED: uncharacterized protein LOC108782831 [Cyphomyrmex costatus]	0	123	29	19	74	166	124	1	85	0	60	45	0	13	92
CrematogasterSubCLCMeta_rep_c657	ref|XP_011881249.1| PREDICTED: uncharacterized protein LOC105569407 [Vollenhovia emeryi]	2176	2314	2546	2443	1877	1855	2372	2836	2754	2389	16331	2753	3238	4075	2313
CrematogasterSubCLCMeta_rep_c658	ref|XP_018373664.1| PREDICTED: uncharacterized protein LOC108767988 [Trachymyrmex cornetzi]	118	98	123	68	100	149	114	104	197	134	721	107	272	294	140
CrematogasterSubCLCMeta_rep_c659	ref|XP_011881894.1| PREDICTED: zinc transporter 7-A [Vollenhovia emeryi]	165	288	281	239	20	870	8	116	60	83	454	10	384	20	118
CrematogasterSubCLCMeta_c660	ref|XP_014469758.1| PREDICTED: uncharacterized protein LOC106741871 [Dinoponera quadriceps]	154	122	334	183	123	47	202	312	159	834	175	245	658	649	3214
CrematogasterSubCLCMeta_rep_c661	ref|XP_011157245.1| PREDICTED: uncharacterized protein LOC105194172 isoform X2 [Solenopsis invicta]	28	37	20	10	64	8	13	20	21	32	21	19	6	21	56
CrematogasterSubCLCMeta_rep_c662	ref|XP_012144186.1| PREDICTED: uncharacterized protein LOC105662916 [Megachile rotundata]	143	20	95	0	5	53	32	11	16	41	163	61	167	43	17
CrematogasterSubCLCMeta_rep_c663	ref|XP_011158520.1| PREDICTED: uncharacterized protein LOC105195020 [Solenopsis invicta]	28	28	16	63	123	48	135	79	77	37	179	120	205	40	135
CrematogasterSubCLCMeta_rep_c664	ref|XP_012231068.1| PREDICTED: DNA polymerase alpha subunit B isoform X2 [Linepithema humile]	49	70	146	31	53	59	32	19	50	83	589	18	51	44	99
CrematogasterSubCLCMeta_rep_c665	ref|XP_018376311.1| PREDICTED: netrin-1-like [Trachymyrmex cornetzi]	3	120	3	12	56	91	75	6	95	0	209	19	19	26	117
CrematogasterSubCLCMeta_c666	ref|XP_011882404.1| PREDICTED: multiple epidermal growth factor-like domains protein 10 isoform X1 [Vollenhovia emeryi]	256	111	509	227	276	1455	508	225	261	93	665	387	374	715	319
CrematogasterSubCLCMeta_rep_c667	ref|XP_011162423.1| PREDICTED: protein FAM98A [Solenopsis invicta]	0	0	0	0	0	37	0	83	27	0	111	19	80	0	0
CrematogasterSubCLCMeta_rep_c668	ref|XP_011881096.1| PREDICTED: tubulin polyglutamylase TTLL6 [Vollenhovia emeryi]	103	34	65	54	55	236	41	42	35	48	45	35	89	10	50
CrematogasterSubCLCMeta_rep_c669	ref|XP_011056959.1| PREDICTED: plexin-B [Acromyrmex echinatior]	485	487	530	553	635	586	540	346	486	330	547	430	892	518	646
CrematogasterSubCLCMeta_rep_c670	ref|XP_018317134.1| PREDICTED: protein aurora borealis [Trachymyrmex zeteki]	34	43	52	10	18	11	26	14	28	34	24	44	43	50	12
CrematogasterSubCLCMeta_c671	ref|XP_011871993.1| PREDICTED: serine protease HTRA2, mitochondrial-like isoform X2 [Vollenhovia emeryi]	3	83	366	3	52	59	14	55	34	0	85	213	26	24	315
CrematogasterSubCLCMeta_c672	ref|XP_011880152.1| PREDICTED: ryanodine receptor 44F isoform X2 [Vollenhovia emeryi]	26	127	13	69	78	4156	127	27	143	141	46	119	302	75	504
CrematogasterSubCLCMeta_rep_c673	ref|XP_011707554.1| PREDICTED: 2-hydroxyacyl-CoA lyase 1 [Wasmannia auropunctata]	5260	3738	4384	5639	4324	4796	5148	4203	3681	5477	3705	6083	3382	5875	5386
CrematogasterSubCLCMeta_rep_c674	ref|XP_011173666.1| PREDICTED: tensin-1-like isoform X1 [Solenopsis invicta]	112	135	81	143	1166	80	137	46	113	147	135	109	154	33	89
CrematogasterSubCLCMeta_rep_c675	ref|XP_012058496.1| PREDICTED: LOW QUALITY PROTEIN: hemolymph lipopolysaccharide-binding protein-like [Atta cephalotes]	16	99	40	88	34	136	111	22	79	0	53	194	37	313	64
CrematogasterSubCLCMeta_c676	ref|XP_018365206.1| PREDICTED: rab-like protein 6 [Trachymyrmex cornetzi]	492	257	430	252	328	299	523	420	321	385	909	139	526	43	140
CrematogasterSubCLCMeta_rep_c677	ref|XP_011872905.1| PREDICTED: macoilin-1 isoform X2 [Vollenhovia emeryi]	4556	4007	6040	3616	4543	7871	4101	3884	4216	5125	4281	5277	5253	4959	4825
CrematogasterSubCLCMeta_rep_c678	ref|XP_018357228.1| PREDICTED: uncharacterized protein LOC108757258 [Trachymyrmex septentrionalis]	686	479	616	579	566	424	700	486	700	514	873	638	597	408	611
CrematogasterSubCLCMeta_rep_c679	ref|XP_011863302.1| PREDICTED: CD109 antigen-like isoform X2 [Vollenhovia emeryi]	5603	4873	4195	3968	3582	3946	3881	3995	3983	5252	5917	7728	4877	8503	6751
CrematogasterSubCLCMeta_rep_c680	ref|XP_012534441.1| PREDICTED: zinc finger protein 1 homolog isoform X5 [Monomorium pharaonis]	63	29	50	42	41	126	123	20	77	200	121	52	66	0	91
CrematogasterSubCLCMeta_c681	ref|XP_011701472.1| PREDICTED: carbohydrate sulfotransferase 11-like [Wasmannia auropunctata]	13	42	74	8	38	44	15	4	19	38	40	34	30	37	25
CrematogasterSubCLCMeta_rep_c682	ref|XP_014470345.1| PREDICTED: Kv channel-interacting protein 1 [Dinoponera quadriceps]	27	83	58	34	92	86	339	104	276	52	227	72	411	112	110
CrematogasterSubCLCMeta_rep_c683	#N/A	53	41	111	58	0	0	0	25	6	44	0	21	2	39	323
CrematogasterSubCLCMeta_rep_c684	ref|XP_011872988.1| PREDICTED: uncharacterized protein LOC105564866 isoform X1 [Vollenhovia emeryi]	1234	1248	1893	842	568	527	855	1113	1028	2864	560	1266	516	3320	1072
CrematogasterSubCLCMeta_rep_c685	ref|XP_011697664.1| PREDICTED: surfeit locus protein 1 [Wasmannia auropunctata]	222	136	268	170	205	4180	259	311	316	216	181	312	346	311	275
CrematogasterSubCLCMeta_rep_c686	#N/A	79	58	61	100	47	33	66	50	94	24	60	48	95	101	68
CrematogasterSubCLCMeta_c687	#N/A	23	9	19	37	3	62	45	19	60	30	89	26	53	19	44
CrematogasterSubCLCMeta_rep_c688	ref|XP_011878634.1| PREDICTED: uncharacterized protein LOC105567951 [Vollenhovia emeryi]	60	56	170	96	42	43	44	87	54	151	83	117	87	86	29
CrematogasterSubCLCMeta_rep_c689	ref|XP_015123819.1| PREDICTED: uncharacterized protein LOC107045921 [Diachasma alloeum]	59	0	118	67	92	21	19	59	35	0	88	32	49	66	114
CrematogasterSubCLCMeta_rep_c690	ref|XP_011684504.1| PREDICTED: claspin-like [Wasmannia auropunctata]	115	120	295	76	157	367	265	106	136	145	645	195	166	286	180
CrematogasterSubCLCMeta_rep_c691	#N/A	29	13	110	65	51	79	44	36	29	37	48	87	44	34	56
CrematogasterSubCLCMeta_rep_c692	ref|XP_011159890.1| PREDICTED: collagen alpha chain CG42342-like isoform X1 [Solenopsis invicta]	7	31	4	8	36	56	28	6	52	0	94	21	41	11	82
CrematogasterSubCLCMeta_rep_c693	ref|XP_018051563.1| PREDICTED: F-box/LRR-repeat protein 4-like [Atta colombica]	1869	1157	1308	1221	1283	1475	1401	1445	1304	1435	1847	1342	1488	1018	1204
CrematogasterSubCLCMeta_rep_c694	ref|XP_011865230.1| PREDICTED: nucleoporin-like protein 2 [Vollenhovia emeryi]	285	238	443	211	394	351	345	225	216	200	330	400	173	290	417
CrematogasterSubCLCMeta_rep_c695	ref|XP_006618330.1| PREDICTED: heterogeneous nuclear ribonucleoprotein A1-like 2-like isoform X5 [Apis dorsata]	4	101	36	25	84	63	59	13	128	0	136	80	104	53	136
CrematogasterSubCLCMeta_rep_c696	ref|XP_011641260.1| PREDICTED: two pore potassium channel protein sup-9 [Pogonomyrmex barbatus]	0	129	11	9	93	150	186	1	149	31	94	110	17	31	106
CrematogasterSubCLCMeta_c697	ref|XP_011871145.1| PREDICTED: protein toll [Vollenhovia emeryi]	106	278	71	40	267	291	337	77	359	0	272	132	227	24	239
CrematogasterSubCLCMeta_c698	ref|XP_011172252.1| PREDICTED: angio-associated migratory cell protein [Solenopsis invicta]	632	392	632	496	390	558	445	528	497	397	1268	346	495	396	284
CrematogasterSubCLCMeta_rep_c699	ref|XP_012221433.1| PREDICTED: xanthine dehydrogenase/oxidase-like isoform X1 [Linepithema humile]	17	20	33	20	5	123	10	14	24	0	21	4	7	36	17
CrematogasterSubCLCMeta_rep_c700	ref|XP_012059594.1| PREDICTED: LOW QUALITY PROTEIN: uncharacterized protein LOC105622792 [Atta cephalotes]	844	0	189	477	555	88	696	622	615	729	1559	0	809	0	0
CrematogasterSubCLCMeta_c701	ref|XP_018377542.1| PREDICTED: calponin homology domain-containing protein DDB_G0272472 isoform X4 [Trachymyrmex cornetzi]	1837	921	1304	1412	2177	1034	2104	1468	1817	1435	4089	1278	1760	1293	1277
CrematogasterSubCLCMeta_c702	ref|XP_011692564.1| PREDICTED: 3-hydroxy-3-methylglutaryl-coenzyme A reductase [Wasmannia auropunctata]	928	632	1516	516	245	864	875	602	912	1417	693	1140	1273	1121	671
CrematogasterSubCLCMeta_rep_c703	ref|XP_018404911.1| PREDICTED: uncharacterized protein LOC108781451 [Cyphomyrmex costatus]	5	152	81	41	989	229	648	63	509	0	923	310	109	0	541
CrematogasterSubCLCMeta_rep_c704	ref|XP_011878252.1| PREDICTED: uncharacterized protein LOC105567749 isoform X1 [Vollenhovia emeryi]	394	1223	1100	230	170	1044	164	160	428	195	507	1417	353	727	1744
CrematogasterSubCLCMeta_rep_c705	ref|XP_011694993.1| PREDICTED: early growth response protein 1-A isoform X1 [Wasmannia auropunctata]	19	39	165	0	89	299	44	80	59	0	70	46	239	13	32
CrematogasterSubCLCMeta_rep_c706	ref|XP_011065127.1| PREDICTED: LOW QUALITY PROTEIN: uncharacterized protein LOC105152490 [Acromyrmex echinatior]	89	204	228	51	212	146	160	72	226	0	181	143	182	211	197
CrematogasterSubCLCMeta_rep_c707	ref|XP_018310428.1| PREDICTED: uncharacterized protein LOC108727028 [Trachymyrmex zeteki]	0	21	14	0	44	76	27	11	23	4	25	13	34	0	16
CrematogasterSubCLCMeta_rep_c708	#N/A	19	53	33	30	39	63	60	22	38	57	36	26	5	16	36
CrematogasterSubCLCMeta_rep_c709	ref|XP_012529898.1| PREDICTED: lanC-like protein 3 homolog, partial [Monomorium pharaonis]	48	48	40	26	78	386	39	50	42	11	37	87	54	11	52
CrematogasterSubCLCMeta_rep_c710	ref|XP_011877103.1| PREDICTED: gamma-aminobutyric acid receptor subunit beta isoform X5 [Vollenhovia emeryi]	54	714	120	238	500	638	580	75	810	36	606	650	69	199	1152
CrematogasterSubCLCMeta_rep_c711	ref|XP_018401896.1| PREDICTED: succinyl-CoA:3-ketoacid coenzyme A transferase 1, mitochondrial [Cyphomyrmex costatus]	2931	1260	1629	2004	1438	1409	1747	1055	1217	2106	759	1709	2202	1485	1634
CrematogasterSubCLCMeta_rep_c712	ref|XP_018051596.1| PREDICTED: integrator complex subunit 6 [Atta colombica]	567	474	1066	516	645	1450	594	510	814	411	295	744	846	550	705
CrematogasterSubCLCMeta_c713	ref|XP_018371111.1| PREDICTED: protein yellow-like [Trachymyrmex cornetzi]	434	175	128	657	149	16	743	838	396	459	36	384	93	296	330
CrematogasterSubCLCMeta_c714	ref|XP_011267336.1| PREDICTED: Down syndrome cell adhesion molecule-like protein Dscam2 isoform X23 [Camponotus floridanus]	266	273	16	229	350	377	557	168	585	140	390	345	204	148	242
CrematogasterSubCLCMeta_c715	ref|XP_018317699.1| PREDICTED: beta-1,3-glucosyltransferase [Trachymyrmex zeteki]	649	397	669	836	708	463	706	567	691	891	782	589	697	288	462
CrematogasterSubCLCMeta_rep_c716	#N/A	4	18	10	0	28	66	26	25	36	11	46	0	22	32	36
CrematogasterSubCLCMeta_c717	ref|XP_017081477.1| PREDICTED: uncharacterized protein LOC108114842 [Drosophila eugracilis]	6	6	12	34	9	36	8	7	31	0	25	9	13	48	31
CrematogasterSubCLCMeta_c718	ref|XP_018300706.1| PREDICTED: pseudouridine-metabolizing bifunctional protein C1861.05 [Trachymyrmex zeteki]	90	70	46	43	91	474	65	48	97	3	80	63	77	46	106
CrematogasterSubCLCMeta_rep_c719	ref|XP_011864370.1| PREDICTED: valine--tRNA ligase-like isoform X2 [Vollenhovia emeryi]	377	474	530	432	573	437	496	313	531	317	542	534	337	487	532
CrematogasterSubCLCMeta_c720	ref|XP_011348995.1| PREDICTED: putative nuclease HARBI1 [Ooceraea biroi]	537	521	488	991	433	38	376	632	602	392	362	492	241	368	490
CrematogasterSubCLCMeta_rep_c721	ref|XP_018309810.1| PREDICTED: uncharacterized protein LOC108726630 [Trachymyrmex zeteki]	8	29	50	48	21	22	7	21	15	38	62	26	36	43	46
CrematogasterSubCLCMeta_c722	ref|XP_003376808.1| retrovirus-related Pol polyprotein from transposon TNT 1-94 [Trichinella spiralis]	157	65	53	761	152	5	390	212	402	646	222	33	175	84	77
CrematogasterSubCLCMeta_rep_c723	ref|XP_011858869.1| PREDICTED: uncharacterized protein LOC105556393 [Vollenhovia emeryi]	56	103	62	43	83	2	60	52	28	32	18	25	44	11	61
CrematogasterSubCLCMeta_rep_c724	ref|XP_016772115.1| PREDICTED: MAP kinase-activating death domain protein isoform X4 [Apis mellifera]	0	94	1	57	144	61	251	12	166	0	187	92	83	11	120
CrematogasterSubCLCMeta_rep_c725	ref|XP_018393611.1| PREDICTED: histone acetyltransferase Tip60 [Cyphomyrmex costatus]	99	128	107	36	48	93	13	23	45	70	263	146	226	93	145
CrematogasterSubCLCMeta_rep_c726	ref|XP_011262452.1| PREDICTED: inositol oxygenase [Camponotus floridanus]	0	0	18	6	7	4	18	11	3	5	9	8	5	7	4
CrematogasterSubCLCMeta_rep_c727	ref|XP_018313558.1| PREDICTED: aminopeptidase N [Trachymyrmex zeteki]	0	0	0	7	2	4807	14	0	6	7	2	4	0	5	2
CrematogasterSubCLCMeta_rep_c728	ref|XP_011691869.1| PREDICTED: uncharacterized protein LOC105452460 isoform X1 [Wasmannia auropunctata]	216	69	0	319	468	774	462	327	486	169	584	144	486	41	124
CrematogasterSubCLCMeta_c729	ref|XP_018045842.1| PREDICTED: NADH-ubiquinone oxidoreductase 75 kDa subunit, mitochondrial isoform X1 [Atta colombica]	309	219	461	421	236	910	304	401	231	257	292	320	375	308	259
CrematogasterSubCLCMeta_rep_c730	ref|XP_011871874.1| PREDICTED: storkhead-box protein 2 isoform X2 [Vollenhovia emeryi]	101	295	780	10	94	123	105	58	87	30	202	122	371	345	182
CrematogasterSubCLCMeta_rep_c731	ref|XP_011255533.1| PREDICTED: apoptosis-resistant E3 ubiquitin protein ligase 1 isoform X2 [Camponotus floridanus]	46	10	17	12	22	58	71	22	40	0	10	77	28	122	90
CrematogasterSubCLCMeta_c732	ref|XP_018374135.1| PREDICTED: kinesin-like protein KIF21A isoform X1 [Trachymyrmex cornetzi]	1000	948	1214	1099	1246	851	1285	914	1343	1272	1923	1131	1207	1176	1462
CrematogasterSubCLCMeta_rep_c733	#N/A	17	0	1	0	15	0	17	2	15	0	23	6	40	13	5
CrematogasterSubCLCMeta_rep_c734	ref|XP_019696482.1| PREDICTED: uncharacterized protein LOC109503748 isoform X2 [Harpegnathos saltator]	4	1	2	39	31	2357	7	7	19	0	10	1	17	2	20
CrematogasterSubCLCMeta_c735	ref|XP_011059736.1| PREDICTED: negative elongation factor B [Acromyrmex echinatior]	25	99	396	49	23	253	7	48	42	25	107	201	287	91	201
CrematogasterSubCLCMeta_rep_c736	ref|XP_011691946.1| PREDICTED: fragile X mental retardation syndrome-related protein 1 isoform X6 [Wasmannia auropunctata]	33	14	7	4	32	12	20	30	30	20	77	6	49	11	30
CrematogasterSubCLCMeta_rep_c737	ref|XP_012531728.1| PREDICTED: kanadaptin [Monomorium pharaonis]	55	0	9	17	0	13	0	9	0	0	21	0	33	0	0
CrematogasterSubCLCMeta_c738	ref|XP_018403380.1| PREDICTED: DNA repair protein complementing XP-C cells homolog [Cyphomyrmex costatus]	61	59	23	117	189	82	165	126	14	196	421	28	176	30	35
CrematogasterSubCLCMeta_c739	ref|XP_018049506.1| PREDICTED: uncharacterized protein LOC108687968 [Atta colombica]	90	20	21	102	83	222	92	89	86	129	27	26	110	77	43
CrematogasterSubCLCMeta_c740	ref|XP_018366047.1| PREDICTED: uncharacterized protein LOC108763166 isoform X2 [Trachymyrmex cornetzi]	6	150	11	8	160	204	143	3	252	0	273	60	78	8	254
CrematogasterSubCLCMeta_c741	ref|XP_011703950.1| PREDICTED: retinol dehydrogenase 12-like [Wasmannia auropunctata]	18	122	207	47	78	21	16	20	84	20	78	163	2	139	361
CrematogasterSubCLCMeta_c742	#N/A	3	17	58	51	44	62	4	32	33	26	9	21	23	63	51
CrematogasterSubCLCMeta_rep_c743	ref|XP_011260385.1| PREDICTED: peroxiredoxin 1 [Camponotus floridanus]	0	0	10	9	10	8	25	4	6	2	9	7	4	6	13
CrematogasterSubCLCMeta_rep_c744	#N/A	8	17	16	7	53	52	44	30	34	17	90	27	27	6	29
CrematogasterSubCLCMeta_rep_c745	ref|XP_011688667.1| PREDICTED: TWiK family of potassium channels protein 18 [Wasmannia auropunctata]	37	21	25	12	12	25	14	12	23	24	25	34	41	68	11
CrematogasterSubCLCMeta_rep_c746	ref|XP_012540957.1| PREDICTED: uncharacterized protein LOC105839297 [Monomorium pharaonis]	192	93	70	52	78	35	45	287	65	14	27	56	103	107	94
CrematogasterSubCLCMeta_c747	ref|XP_018374075.1| PREDICTED: uncharacterized protein LOC108768216 [Trachymyrmex cornetzi]	115	14	33	40	132	52	44	95	93	346	101	136	69	64	269
CrematogasterSubCLCMeta_rep_c748	ref|XP_011871127.1| PREDICTED: importin subunit alpha-9 isoform X1 [Vollenhovia emeryi]	557	282	535	606	464	590	281	326	454	580	327	527	505	479	470
CrematogasterSubCLCMeta_c749	ref|XP_011880486.1| PREDICTED: uncharacterized protein LOC105568985 isoform X4 [Vollenhovia emeryi]	46	40	15	26	73	72	97	11	80	13	111	46	28	29	48
CrematogasterSubCLCMeta_rep_c750	ref|XP_018802902.1| PREDICTED: blastoderm-specific protein 25D isoform X2 [Bactrocera latifrons]	105	0	0	106	59	0	30	102	65	27	0	0	38	0	0
CrematogasterSubCLCMeta_rep_c751	ref|XP_011163392.1| PREDICTED: phosphoglycerate kinase [Solenopsis invicta]	2688	2322	4824	1843	2584	1790	1931	3117	2917	2033	2252	1693	2398	1709	1234
CrematogasterSubCLCMeta_rep_c752	ref|XP_011158767.1| PREDICTED: nascent polypeptide-associated complex subunit alpha, muscle-specific form-like [Solenopsis invicta]	2	33	0	4	0	5	0	7	18	33	30	10	9	42	45
CrematogasterSubCLCMeta_rep_c753	ref|XP_011260687.1| PREDICTED: esterase FE4 [Camponotus floridanus]	0	0	6	52	8	18	23	8	3	28	40	7	45	82	8
CrematogasterSubCLCMeta_c754	ref|XP_011685510.1| PREDICTED: 60S ribosomal protein L12 [Wasmannia auropunctata]	2741	2497	3166	2664	2526	2329	2907	2577	2432	2240	4030	2637	2361	1583	2114
CrematogasterSubCLCMeta_rep_c755	ref|XP_016920028.1| PREDICTED: cytochrome P450 9e2-like [Apis cerana]	73	109	0	0	0	0	1	0	0	81	0	0	0	0	1
CrematogasterSubCLCMeta_c756	ref|XP_011638444.1| PREDICTED: F-actin-capping protein subunit beta isoform X1 [Pogonomyrmex barbatus]	1084	1032	1176	594	906	890	1002	1190	1059	1005	1375	1076	1728	731	1084
CrematogasterSubCLCMeta_c757	ref|XP_018371389.1| PREDICTED: uncharacterized protein LOC108766542 [Trachymyrmex cornetzi]	93	33	65	151	94	43	45	106	70	108	111	66	69	31	68
CrematogasterSubCLCMeta_rep_c758	ref|XP_011860497.1| PREDICTED: uncharacterized protein LOC105557776 isoform X1 [Vollenhovia emeryi]	12	68	42	15	53	264	52	67	67	32	17	67	86	7	64
CrematogasterSubCLCMeta_rep_c759	ref|XP_011870258.1| PREDICTED: calcium-dependent secretion activator isoform X2 [Vollenhovia emeryi]	164	1542	545	835	1885	1438	2623	310	2667	461	2079	1661	346	217	1926
CrematogasterSubCLCMeta_c760	ref|XP_018392616.1| PREDICTED: muscle-specific protein 20-like [Cyphomyrmex costatus]	664	0	12	484	321	0	496	278	422	1039	192	174	302	2	5
CrematogasterSubCLCMeta_c761	ref|XP_012229918.1| PREDICTED: TWiK family of potassium channels protein 18 isoform X2 [Linepithema humile]	0	32	27	0	14	24	62	2	75	23	36	16	20	0	37
CrematogasterSubCLCMeta_rep_c762	ref|XP_011868103.1| PREDICTED: probable fatty acid-binding protein isoform X1 [Vollenhovia emeryi]	337	93	422	745	307	210	338	233	240	231	405	270	486	445	341
CrematogasterSubCLCMeta_c763	ref|XP_018369139.1| PREDICTED: homeodomain-interacting protein kinase 2 isoform X8 [Trachymyrmex cornetzi]	863	633	383	747	654	1292	1467	1246	1422	539	2957	666	1504	756	679
CrematogasterSubCLCMeta_c764	ref|XP_011636922.1| PREDICTED: uncharacterized protein LOC105427066 isoform X1 [Pogonomyrmex barbatus]	108	117	160	70	153	161	222	114	199	215	352	144	140	36	136
CrematogasterSubCLCMeta_rep_c765	ref|XP_011867282.1| PREDICTED: uncharacterized protein LOC105561689 [Vollenhovia emeryi]	53	122	170	18	115	624	253	128	247	93	284	120	86	59	235
CrematogasterSubCLCMeta_c766	ref|XP_011701661.1| PREDICTED: mannose-P-dolichol utilization defect 1 protein homolog [Wasmannia auropunctata]	2331	1660	1732	2568	1433	1191	1508	2437	1551	2287	683	2369	1330	2919	1915
CrematogasterSubCLCMeta_c767	ref|XP_012540262.1| PREDICTED: UPF0183 protein CG7083 isoform X1 [Monomorium pharaonis]	206	122	303	117	200	947	219	115	269	262	330	247	145	342	229
CrematogasterSubCLCMeta_c768	ref|XP_011637406.1| PREDICTED: tubulin beta-1 chain [Pogonomyrmex barbatus]	0	0	5	15	10	2	18	6	4	9	8	8	12	20	4
CrematogasterSubCLCMeta_rep_c769	ref|XP_008486697.1| PREDICTED: vacuolar protein sorting-associated protein 41 homolog [Diaphorina citri]	4	14	22	35	20	48	71	49	18	0	69	5	54	0	0
CrematogasterSubCLCMeta_c770	ref|XP_018044194.1| PREDICTED: proteasome subunit beta type-3 [Atta colombica]	2002	701	1868	16	11	2336	1204	1692	0	0	751	22	24	0	1567
CrematogasterSubCLCMeta_c771	ref|XP_011859363.1| PREDICTED: uncharacterized protein LOC105556859 [Vollenhovia emeryi]	173	27	48	16	105	0	23	59	33	148	1	9	81	0	42
CrematogasterSubCLCMeta_rep_c772	#N/A	7	14	36	24	0	17	8	19	22	1	0	2	17	0	8
CrematogasterSubCLCMeta_rep_c773	ref|XP_011690798.1| PREDICTED: UDP-glucuronosyltransferase 2C1-like [Wasmannia auropunctata]	0	7	21	1	6	129	14	9	0	0	22	0	0	23	13
CrematogasterSubCLCMeta_rep_c774	ref|XP_011705197.1| PREDICTED: uncharacterized protein LOC105460443 [Wasmannia auropunctata]	283	74	300	265	272	89	150	125	207	293	108	137	180	138	156
CrematogasterSubCLCMeta_c775	#N/A	29	64	0	19	39	27	114	6	62	42	86	93	19	12	44
CrematogasterSubCLCMeta_rep_c776	ref|XP_011155728.1| PREDICTED: uncharacterized protein LOC105193092 [Solenopsis invicta]	25	8	8	9	42	12	52	25	81	0	29	56	6	17	47
CrematogasterSubCLCMeta_rep_c777	ref|XP_011159298.1| PREDICTED: uncharacterized protein LOC105195547 [Solenopsis invicta]	19	21	2	41	21	47	7	12	6	0	30	11	12	1	9
CrematogasterSubCLCMeta_rep_c778	#N/A	22	14	0	57	34	99	53	26	39	49	20	18	38	22	8
CrematogasterSubCLCMeta_rep_c779	ref|XP_011871352.1| PREDICTED: ADP-ribosylation factor GTPase-activating protein 2 isoform X2 [Vollenhovia emeryi]	1358	1053	865	904	1311	297	1320	864	1213	1057	1682	761	1332	1140	733
CrematogasterSubCLCMeta_c780	ref|XP_018392656.1| PREDICTED: neo-calmodulin-like isoform X3 [Cyphomyrmex costatus]	30	67	65	53	69	40	48	11	50	102	63	65	31	72	90
CrematogasterSubCLCMeta_c781	#N/A	39	50	25	88	14	10	44	12	37	31	13	20	10	30	22
CrematogasterSubCLCMeta_rep_c782	#N/A	192	73	161	149	45	178	70	115	114	85	419	66	139	106	89
CrematogasterSubCLCMeta_rep_c783	ref|XP_011872247.1| PREDICTED: translin-associated protein X [Vollenhovia emeryi]	933	692	1142	862	943	1371	1025	711	767	788	1767	894	1020	830	809
CrematogasterSubCLCMeta_rep_c784	ref|XP_018312846.1| PREDICTED: cGMP-specific 3',5'-cyclic phosphodiesterase isoform X1 [Trachymyrmex zeteki]	0	189	0	0	153	565	126	41	139	0	130	43	23	141	175
CrematogasterSubCLCMeta_rep_c785	ref|XP_008560233.1| PREDICTED: N-acetyltransferase 10 isoform X2 [Microplitis demolitor]	14	76	21	27	33	10	75	2	70	0	120	22	0	16	61
CrematogasterSubCLCMeta_c786	ref|XP_012525125.1| PREDICTED: transmembrane emp24 domain-containing protein [Monomorium pharaonis]	1129	245	414	901	1046	721	1037	1120	853	903	646	284	1054	247	292
CrematogasterSubCLCMeta_c787	ref|XP_011876846.1| PREDICTED: uncharacterized protein LOC105566980 [Vollenhovia emeryi]	123	175	144	286	329	0	244	138	161	445	167	69	155	53	131
CrematogasterSubCLCMeta_rep_c788	ref|XP_011882266.1| PREDICTED: uncharacterized protein LOC105569983 [Vollenhovia emeryi]	0	137	1291	38	0	121	0	8	6	0	60	178	33	266	972
CrematogasterSubCLCMeta_c789	ref|XP_018365957.1| PREDICTED: uncharacterized protein LOC108763108 isoform X1 [Trachymyrmex cornetzi]	115	380	793	558	286	886	242	154	174	132	126	511	133	303	636
CrematogasterSubCLCMeta_c790	ref|XP_011707608.1| PREDICTED: uncharacterized protein LOC105462603 [Wasmannia auropunctata]	33	156	355	18	17	0	324	68	67	77	82	0	112	46	68
CrematogasterSubCLCMeta_c791	ref|XP_009061477.1| hypothetical protein LOTGIDRAFT_166177 [Lottia gigantea]	31	42	110	17	90	107	73	78	66	92	173	44	110	59	61
CrematogasterSubCLCMeta_c792	ref|XP_020285130.1| glycogen debranching enzyme isoform X3 [Pseudomyrmex gracilis]	81	1371	35	108	796	4108	1744	1433	16	0	16	59	32	64	2651
CrematogasterSubCLCMeta_c793	ref|XP_011160701.1| PREDICTED: growth arrest-specific protein 2-like isoform X1 [Solenopsis invicta]	0	108	567	0	108	129	0	0	111	0	0	807	0	316	296
CrematogasterSubCLCMeta_rep_c794	ref|XP_011696515.1| PREDICTED: transcriptional adapter 3-B [Wasmannia auropunctata]	1537	1341	1661	1827	1686	1285	1688	1675	1833	1322	1575	1755	1654	1723	1730
CrematogasterSubCLCMeta_rep_c795	ref|XP_018300079.1| PREDICTED: sodium leak channel non-selective protein [Trachymyrmex zeteki]	72	72	16	39	372	171	419	94	413	165	385	55	81	24	20
CrematogasterSubCLCMeta_c796	ref|XP_011882322.1| PREDICTED: uncharacterized protein LOC105570021 isoform X1 [Vollenhovia emeryi]	1726	969	624	2552	3246	1782	2899	2714	2548	3506	3005	944	2627	713	1027
CrematogasterSubCLCMeta_rep_c797	ref|XP_011875580.1| PREDICTED: protein vein isoform X2 [Vollenhovia emeryi]	8	65	57	55	62	126	142	12	157	1	120	35	32	1	135
CrematogasterSubCLCMeta_c798	ref|XP_018377823.1| PREDICTED: chitinase domain-containing protein 1 isoform X1 [Trachymyrmex cornetzi]	165	390	774	68	54	16	69	12	44	0	65	398	5	553	283
CrematogasterSubCLCMeta_rep_c799	ref|XP_011872486.1| PREDICTED: hemicentin-2 isoform X1 [Vollenhovia emeryi]	0	48	15	44	103	167	149	1	157	22	164	67	61	19	139
CrematogasterSubCLCMeta_rep_c800	ref|XP_016919076.1| PREDICTED: patronin isoform X16 [Apis cerana]	64	66	40	45	27	98	24	29	61	53	70	50	70	48	85
CrematogasterSubCLCMeta_rep_c801	ref|XP_011879332.1| PREDICTED: putative fatty acyl-CoA reductase CG5065 [Vollenhovia emeryi]	15	206	261	84	36	314	25	3	30	12	548	70	658	401	21
CrematogasterSubCLCMeta_c802	ref|XP_011701895.1| PREDICTED: fanconi-associated nuclease 1-like [Wasmannia auropunctata]	996	666	924	1389	3274	63	1701	1745	988	626	1783	598	2082	521	981
CrematogasterSubCLCMeta_c803	#N/A	14	4	25	36	5	7	29	11	49	0	17	24	37	24	20
CrematogasterSubCLCMeta_rep_c804	ref|XP_011863910.1| PREDICTED: neuroligin-4, X-linked-like [Vollenhovia emeryi]	0	97	0	12	30	52	77	2	41	0	81	15	0	0	27
CrematogasterSubCLCMeta_rep_c805	ref|XP_011878031.1| PREDICTED: slit homolog 3 protein [Vollenhovia emeryi]	6	39	0	37	36	57	72	20	93	9	20	53	29	29	81
CrematogasterSubCLCMeta_rep_c806	ref|XP_018315957.1| PREDICTED: hepatocyte nuclear factor 4-gamma isoform X4 [Trachymyrmex zeteki]	93	41	65	70	121	337	108	83	122	55	6	46	43	50	99
CrematogasterSubCLCMeta_c807	ref|XP_012225651.1| PREDICTED: uncharacterized protein LOC105674106 [Linepithema humile]	133	166	178	216	160	7	241	193	198	112	101	194	96	330	473
CrematogasterSubCLCMeta_c808	ref|XP_011881027.1| PREDICTED: uncharacterized protein LOC105569285 [Vollenhovia emeryi]	3	0	0	1	12	26	0	5	6	0	1384	2	31	0	6
CrematogasterSubCLCMeta_c809	ref|XP_011869260.1| PREDICTED: AP-3 complex subunit beta-1 [Vollenhovia emeryi]	286	75	0	184	70	0	66	84	170	588	812	188	211	205	45
CrematogasterSubCLCMeta_c810	ref|XP_011870140.1| PREDICTED: peroxidasin isoform X2 [Vollenhovia emeryi]	69	59	47	95	212	67	152	63	176	77	179	191	95	41	178
CrematogasterSubCLCMeta_rep_c811	ref|XP_018370232.1| PREDICTED: homeotic protein spalt-major-like isoform X3 [Trachymyrmex cornetzi]	27	48	34	103	75	70	130	44	136	37	120	49	41	83	109
CrematogasterSubCLCMeta_rep_c812	ref|XP_001946006.2| PREDICTED: uncharacterized protein LOC100162107 [Acyrthosiphon pisum]	26	16	28	0	14	3	0	5	6	0	15	0	4	0	5
CrematogasterSubCLCMeta_c813	ref|XP_017034938.1| PREDICTED: large subunit GTPase 1 homolog [Drosophila kikkawai]	0	22	0	0	28	35	42	0	65	0	34	26	0	0	65
CrematogasterSubCLCMeta_c814	ref|XP_011334612.1| PREDICTED: uncharacterized protein LOC105277723 [Ooceraea biroi]	18	89	0	9	134	18	29	36	84	0	52	115	43	35	76
CrematogasterSubCLCMeta_rep_c815	ref|XP_011698129.1| PREDICTED: uncharacterized protein LOC105456055, partial [Wasmannia auropunctata]	42	1	0	396	169	22	1	69	2	1	47	13	16	225	16
CrematogasterSubCLCMeta_c816	ref|XP_018371672.1| PREDICTED: WD repeat-containing protein 47 isoform X1 [Trachymyrmex cornetzi]	30	649	280	104	74	591	35	106	102	0	78	599	144	840	788
CrematogasterSubCLCMeta_rep_c817	ref|XP_011644632.1| PREDICTED: structural maintenance of chromosomes protein 3 [Pogonomyrmex barbatus]	3320	1810	2657	3231	4020	2257	2478	3122	2628	3197	2565	3116	3232	2167	4051
CrematogasterSubCLCMeta_c818	ref|XP_011698265.1| PREDICTED: uncharacterized protein LOC105456142, partial [Wasmannia auropunctata]	26	77	111	0	65	0	140	1	0	0	0	34	1	11	0
CrematogasterSubCLCMeta_c819	ref|XP_018299850.1| PREDICTED: 1-phosphatidylinositol 4,5-bisphosphate phosphodiesterase classes I and II isoform X1 [Trachymyrmex zeteki]	471	396	461	461	449	607	467	490	367	309	372	484	540	374	567
CrematogasterSubCLCMeta_c820	ref|XP_014299312.1| PREDICTED: uncharacterized protein LOC106694005 [Microplitis demolitor]	105	0	1	107	78	0	55	71	46	32	92	3	106	0	0
CrematogasterSubCLCMeta_rep_c821	ref|XP_011881652.1| PREDICTED: zinc finger protein 598 [Vollenhovia emeryi]	256	253	350	141	111	1536	347	154	310	402	382	665	387	55	282
CrematogasterSubCLCMeta_c822	ref|XP_011163887.1| PREDICTED: uncharacterized protein LOC105198750, partial [Solenopsis invicta]	15	0	8	28	15	5	5	3	29	1	158	0	50	13	0
CrematogasterSubCLCMeta_c823	ref|XP_011867345.1| PREDICTED: 5-hydroxytryptamine receptor 2A isoform X2 [Vollenhovia emeryi]	0	38	82	0	36	37	32	0	14	0	46	28	25	0	25
CrematogasterSubCLCMeta_rep_c824	ref|XP_011058014.1| PREDICTED: uncharacterized protein LOC105148165 [Acromyrmex echinatior]	264	142	265	173	209	815	247	166	186	236	651	227	239	226	205
CrematogasterSubCLCMeta_c825	ref|XP_011172395.1| PREDICTED: OCIA domain-containing protein 1 [Solenopsis invicta]	155	148	283	224	131	224	175	125	51	129	158	226	217	142	270
CrematogasterSubCLCMeta_c826	#N/A	0	23	0	9	1	14	10	7	10	10	13	17	11	0	9
CrematogasterSubCLCMeta_c827	ref|XP_011699894.1| PREDICTED: uncharacterized protein LOC105457120 isoform X1 [Wasmannia auropunctata]	69	44	53	23	18	74	15	14	27	0	79	10	70	10	8
CrematogasterSubCLCMeta_c828	ref|XP_020305650.1| nucleolar protein 6, variant [Loa loa]	0	0	20	0	2	11	33	12	3	0	0	12	6	53	20
CrematogasterSubCLCMeta_rep_c829	ref|XP_020289649.1| nuclear receptor subfamily 2 group E member 1-like isoform X2 [Pseudomyrmex gracilis]	12	4	56	22	29	627	32	6	23	6	28	16	9	10	27
CrematogasterSubCLCMeta_c830	ref|XP_019698002.1| PREDICTED: uncharacterized protein LOC109504028 [Harpegnathos saltator]	0	0	13	39	15	7	27	12	5	14	21	11	19	52	9
CrematogasterSubCLCMeta_c831	ref|XP_011255270.1| PREDICTED: alpha-2-macroglobulin-like protein 1 [Camponotus floridanus]	0	0	8	16	3	5	9	3	3	14	6	1	7	16	3
CrematogasterSubCLCMeta_rep_c832	ref|XP_018377996.1| PREDICTED: uncharacterized protein LOC108770781 isoform X2 [Trachymyrmex cornetzi]	0	0	5	52	54	9	3	18	13	0	29	17	23	0	26
CrematogasterSubCLCMeta_c833	ref|XP_015113130.1| PREDICTED: fatty acid synthase-like [Diachasma alloeum]	5	14	35	0	9	6	11	18	20	12	3	3	4	8	13
CrematogasterSubCLCMeta_c834	ref|XP_018342134.1| PREDICTED: uncharacterized protein LOC108748446 [Trachymyrmex septentrionalis]	11	61	32	31	23	11	26	24	31	24	4	28	18	0	38
CrematogasterSubCLCMeta_rep_c835	#N/A	85	127	95	39	91	202	162	34	112	34	121	124	150	84	195
CrematogasterSubCLCMeta_c836	ref|XP_011867543.1| PREDICTED: neprilysin-1 [Vollenhovia emeryi]	35	31	14	117	47	40	94	27	89	28	100	40	32	40	65
CrematogasterSubCLCMeta_c837	ref|XP_018402590.1| PREDICTED: uncharacterized protein LOC108779630 [Cyphomyrmex costatus]	171	259	135	231	142	15	157	136	169	181	15	117	131	118	148
CrematogasterSubCLCMeta_rep_c838	ref|XP_011704679.1| PREDICTED: putative inorganic phosphate cotransporter [Wasmannia auropunctata]	541	192	222	399	259	170	201	236	269	385	284	434	309	324	351
CrematogasterSubCLCMeta_c839	ref|XP_011879364.1| PREDICTED: UDP-glucuronosyltransferase 2B23-like isoform X1 [Vollenhovia emeryi]	99	6	0	0	7	24	49	8	21	0	9	77	695	0	6
CrematogasterSubCLCMeta_c840	ref|XP_011866450.1| PREDICTED: probable cytochrome P450 303a1 [Vollenhovia emeryi]	383	300	196	447	499	67	658	278	488	458	556	423	437	270	481
CrematogasterSubCLCMeta_c841	#N/A	6	0	0	1	0	380	0	8	12	0	0	0	15	13	0
CrematogasterSubCLCMeta_rep_c842	ref|XP_012055440.1| PREDICTED: forkhead box protein P1 [Atta cephalotes]	20	89	23	18	78	95	94	42	99	7	37	15	54	82	75
CrematogasterSubCLCMeta_rep_c843	#N/A	47	2	14	19	82	0	58	97	129	59	44	11	50	0	36
CrematogasterSubCLCMeta_c844	ref|XP_011861922.1| PREDICTED: putative zinc metalloproteinase YIL108W [Vollenhovia emeryi]	135	183	103	156	277	133	215	113	238	20	265	212	207	61	173
CrematogasterSubCLCMeta_c845	#N/A	0	46	0	0	24	21	7	0	37	0	17	10	1	0	36
CrematogasterSubCLCMeta_c846	ref|XP_011155999.1| PREDICTED: ribosomal protein S6 kinase beta-1-like [Solenopsis invicta]	26	27	31	9	13	64	66	59	91	2	301	7	254	25	16
CrematogasterSubCLCMeta_rep_c847	ref|XP_020287972.1| protein GDAP2 homolog [Pseudomyrmex gracilis]	187	169	174	192	161	1150	151	191	195	33	194	121	196	240	331
CrematogasterSubCLCMeta_c848	ref|XP_018316984.1| PREDICTED: uncharacterized protein LOC108731252 isoform X2 [Trachymyrmex zeteki]	48	184	40	147	120	159	176	42	259	0	267	133	151	89	233
CrematogasterSubCLCMeta_c849	ref|XP_011880872.1| PREDICTED: uncharacterized protein LOC105569219 isoform X1 [Vollenhovia emeryi]	0	35	29	3	74	45	28	5	47	0	38	18	13	0	56
CrematogasterSubCLCMeta_rep_c850	ref|XP_011876482.1| PREDICTED: sodium-dependent nutrient amino acid transporter 1-like isoform X1 [Vollenhovia emeryi]	17	3	36	13	4	201	2	25	64	0	69	22	113	69	1373
CrematogasterSubCLCMeta_rep_c851	ref|XP_018398417.1| PREDICTED: S1 RNA-binding domain-containing protein 1 [Cyphomyrmex costatus]	20	81	33	32	82	82	57	50	77	67	135	84	156	36	134
CrematogasterSubCLCMeta_c852	ref|XP_018352255.1| PREDICTED: vesicle-associated membrane protein-associated protein B [Trachymyrmex septentrionalis]	4	6	30	0	0	0	3	4	0	0	3	0	2	0	0
CrematogasterSubCLCMeta_c853	ref|XP_018009903.1| PREDICTED: kelch-like protein 18 isoform X3 [Hyalella azteca]	0	24	0	0	10	11	11	2	19	0	35	4	7	0	14
CrematogasterSubCLCMeta_c854	#N/A	0	0	18	5	9	20	18	7	12	0	39	15	39	12	6
CrematogasterSubCLCMeta_c855	ref|XP_011884026.1| PREDICTED: golgin subfamily A member 6-like protein 22, partial [Vollenhovia emeryi]	0	1	13	6	28	5	10	3	31	0	22	5	70	21	14
CrematogasterSubCLCMeta_c856	#N/A	179	40	67	22	18	55	9	45	13	0	25	16	10	20	31
CrematogasterSubCLCMeta_c857	ref|XP_018045021.1| PREDICTED: zinc finger protein 845-like [Atta colombica]	455	0	0	314	37	0	430	255	0	250	614	0	616	401	0
CrematogasterSubCLCMeta_rep_c858	#N/A	31	32	88	12	75	5	23	28	33	18	32	26	33	18	33
CrematogasterSubCLCMeta_c859	ref|XP_018368526.1| PREDICTED: uncharacterized protein LOC108764680 [Trachymyrmex cornetzi]	31	48	280	0	93	0	61	9	11	39	151	125	43	3	120
CrematogasterSubCLCMeta_rep_c860	ref|XP_018312461.1| PREDICTED: regulator of G-protein signaling loco isoform X1 [Trachymyrmex zeteki]	725	1614	2005	1069	474	953	692	1019	896	539	1003	2033	797	1959	2017
CrematogasterSubCLCMeta_rep_c861	ref|XP_011883526.1| PREDICTED: death-associated protein kinase 1-like isoform X1 [Vollenhovia emeryi]	46	135	292	0	43	477	300	136	353	79	150	18	187	121	129
CrematogasterSubCLCMeta_rep_c862	ref|XP_011878209.1| PREDICTED: Down syndrome cell adhesion molecule-like [Vollenhovia emeryi]	72	182	100	98	86	58	207	248	507	70	733	401	285	129	493
CrematogasterSubCLCMeta_c863	#N/A	33	114	32	10	118	8	20	27	17	39	36	17	0	116	90
CrematogasterSubCLCMeta_rep_c864	ref|XP_011642992.1| PREDICTED: collagen alpha-1(IX) chain isoform X7 [Pogonomyrmex barbatus]	24	29	53	8	38	40	48	22	43	0	37	36	24	2	38
CrematogasterSubCLCMeta_c865	#N/A	47	30	48	7	114	41	78	46	49	0	10	87	46	13	47
CrematogasterSubCLCMeta_rep_c866	ref|XP_011061595.1| PREDICTED: farnesyl pyrophosphate synthase-like isoform X2 [Acromyrmex echinatior]	1	15	0	0	7	8	2	12	9	0	67	14	30	37	40
CrematogasterSubCLCMeta_rep_c867	ref|XP_012521782.1| PREDICTED: dynamin-1-like protein [Monomorium pharaonis]	67	102	1385	119	158	320	172	104	178	23	81	866	154	898	115
CrematogasterSubCLCMeta_c868	ref|XP_019885404.1| PREDICTED: uncharacterized protein LOC105257630 [Camponotus floridanus]	0	37	18	9	26	48	0	2	25	3	26	0	28	0	42
CrematogasterSubCLCMeta_c869	ref|XP_011860713.1| PREDICTED: tenascin-like [Vollenhovia emeryi]	0	21	19	18	24	53	37	2	28	20	107	9	166	1	33
CrematogasterSubCLCMeta_c870	ref|XP_018406162.1| PREDICTED: putative uncharacterized protein FLJ37770 [Cyphomyrmex costatus]	77	15	0	4	5	2	6	4	26	27	25	0	27	11	12
CrematogasterSubCLCMeta_c871	ref|XP_018337728.1| PREDICTED: magnesium-dependent phosphatase 1-like [Trachymyrmex septentrionalis]	0	0	10	0	37	13	18	4	22	1	15	9	5	0	0
CrematogasterSubCLCMeta_rep_c872	ref|XP_014487749.1| PREDICTED: uncharacterized protein LOC106751386 [Dinoponera quadriceps]	52	70	272	180	76	40	95	30	96	0	23	44	65	41	27
CrematogasterSubCLCMeta_rep_c873	ref|XP_018377780.1| PREDICTED: uncharacterized protein LOC108770598 [Trachymyrmex cornetzi]	0	19	0	6	34	30	15	0	34	0	38	12	8	0	26
CrematogasterSubCLCMeta_c874	ref|XP_011053188.1| PREDICTED: delta(14)-sterol reductase [Acromyrmex echinatior]	120	305	184	84	272	205	244	43	370	0	358	245	140	251	269
CrematogasterSubCLCMeta_c875	ref|XP_018396746.1| PREDICTED: inositol monophosphatase 2-like [Cyphomyrmex costatus]	6	15	88	20	35	24	6	0	75	0	35	54	35	36	1151
CrematogasterSubCLCMeta_c876	ref|XP_011164605.1| PREDICTED: proteasome subunit alpha type-2 [Solenopsis invicta]	30	111	260	9	44	16	69	15	49	0	60	139	44	59	73
CrematogasterSubCLCMeta_rep_c877	#N/A	53	13	23	22	76	53	25	26	47	35	0	6	38	31	17
CrematogasterSubCLCMeta_c878	ref|XP_012539463.1| PREDICTED: uncharacterized protein LOC105838442, partial [Monomorium pharaonis]	0	23	0	0	30	17	59	0	17	0	24	9	0	1	22
CrematogasterSubCLCMeta_c879	ref|XP_018648011.1| putative voltage-gated potassium channel [Schistosoma mansoni]	0	1	0	0	5	15	6	0	21	0	15	0	3	0	11
CrematogasterSubCLCMeta_c880	ref|XP_011876984.1| PREDICTED: uncharacterized protein LOC105567056, partial [Vollenhovia emeryi]	28	30	8	16	114	0	33	17	28	40	18	8	18	0	5
CrematogasterSubCLCMeta_c881	ref|XP_011688410.1| PREDICTED: transient receptor potential cation channel protein painless-like [Wasmannia auropunctata]	0	89	210	12	1	5	6	0	4	11	6	0	0	0	150
CrematogasterSubCLCMeta_c882	ref|XP_012228184.1| PREDICTED: uncharacterized protein LOC105675538 [Linepithema humile]	0	16	6	0	14	0	30	11	12	0	8	8	0	13	32
CrematogasterSubCLCMeta_c883	ref|XP_012055293.1| PREDICTED: protein slit [Atta cephalotes]	6	29	33	15	93	79	52	25	111	30	72	104	70	40	93
CrematogasterSubCLCMeta_c884	ref|XP_012232667.1| PREDICTED: uncharacterized protein LOC105678149 [Linepithema humile]	0	10	0	0	3	0	0	0	0	0	0	2	0	0	0
CrematogasterSubCLCMeta_c885	ref|XP_018398742.1| PREDICTED: flotillin-1 isoform X2 [Cyphomyrmex costatus]	0	0	48	466	230	2662	165	158	0	0	0	0	0	20	14
CrematogasterSubCLCMeta_c886	ref|XP_011867287.1| PREDICTED: zinc finger RNA-binding protein isoform X2 [Vollenhovia emeryi]	1726	791	2348	2068	2303	2693	1423	1357	2020	956	4158	1722	1250	1484	1574
CrematogasterSubCLCMeta_c887	ref|XP_011871048.1| PREDICTED: junctophilin-1 isoform X2 [Vollenhovia emeryi]	1310	521	1386	1638	1055	2086	1300	975	1347	1900	1138	899	1403	1490	1015
CrematogasterSubCLCMeta_c888	ref|XP_018406514.1| PREDICTED: uncharacterized protein LOC108782685 [Cyphomyrmex costatus]	430	187	257	617	450	619	750	692	1129	304	538	115	743	289	461
CrematogasterSubCLCMeta_rep_c889	ref|XP_018344602.1| PREDICTED: nephrin-like isoform X3 [Trachymyrmex septentrionalis]	116	261	576	122	470	671	462	287	476	121	417	243	427	48	297
CrematogasterSubCLCMeta_c890	ref|XP_022831056.1| D-beta-hydroxybutyrate dehydrogenase, mitochondrial [Spodoptera litura]	85	0	9	36	43	40	40	27	25	16	6	29	19	83	64
CrematogasterSubCLCMeta_c891	ref|XP_011864502.1| PREDICTED: uncharacterized protein LOC105560213 [Vollenhovia emeryi]	1	78	0	4	57	76	59	2	65	0	16	22	1	0	73
CrematogasterSubCLCMeta_c892	ref|XP_011867240.1| PREDICTED: uncharacterized protein LOC105561666 isoform X5 [Vollenhovia emeryi]	0	15	0	33	8	0	15	12	9	15	5	0	4	0	13
CrematogasterSubCLCMeta_rep_c893	ref|XP_011175403.1| PREDICTED: uncharacterized protein LOC105207566 [Solenopsis invicta]	267	43	203	202	150	182	234	148	162	119	241	199	284	217	240
CrematogasterSubCLCMeta_c894	#N/A	0	17	0	0	0	14	4	2	24	0	20	0	5	11	0
CrematogasterSubCLCMeta_c895	ref|XP_011640094.1| PREDICTED: disintegrin and metalloproteinase domain-containing protein 10 isoform X2 [Pogonomyrmex barbatus]	51	58	140	60	52	7	29	66	135	0	87	54	61	64	93
CrematogasterSubCLCMeta_rep_c896	#N/A	1016	468	810	811	669	126	555	645	761	821	1264	539	526	168	686
CrematogasterSubCLCMeta_c897	ref|YP_009114828.1| NADH dehydrogenase subunit 5 (mitochondrion) [Demodex brevis]	12	29	470	0	1	0	4	0	7	0	22	0	92	0	5
CrematogasterSubCLCMeta_c898	#N/A	52	152	1	256	47	180	166	186	110	40	100	79	67	812	177
CrematogasterSubCLCMeta_c899	ref|XP_014787776.1| PREDICTED: integrin alpha-9-like, partial [Octopus bimaculoides]	26	5	16	17	3	15	29	5	13	7	11	5	11	0	11
CrematogasterSubCLCMeta_rep_c900	ref|XP_018346337.1| PREDICTED: uncharacterized protein LOC108750953 [Trachymyrmex septentrionalis]	14	4	24	0	8	20	4	1	1	1	0	3	6	0	0
CrematogasterSubCLCMeta_rep_c901	ref|XP_011875421.1| PREDICTED: protein bric-a-brac 2-like isoform X1 [Vollenhovia emeryi]	0	35	0	17	0	0	0	0	0	0	23	0	0	5	0
CrematogasterSubCLCMeta_c902	#N/A	0	32	0	0	7	29	0	0	13	0	21	19	16	0	0
CrematogasterSubCLCMeta_c903	ref|XP_020292672.1| pyroglutamylated RFamide peptide receptor-like isoform X1 [Pseudomyrmex gracilis]	0	0	11	12	8	0	0	4	3	1	0	30	7	0	3
CrematogasterSubCLCMeta_c904	ref|XP_020280496.1| trichohyalin-like [Pseudomyrmex gracilis]	0	0	0	0	0	249	0	0	0	0	4	0	5	0	0
CrematogasterSubCLCMeta_c905	ref|XP_012530854.1| PREDICTED: nonsense-mediated mRNA decay protein 2-like [Monomorium pharaonis]	33	34	14	0	15	0	22	4	26	0	95	34	2	0	30
CrematogasterSubCLCMeta_c906	ref|XP_018358921.1| PREDICTED: cystinosin homolog isoform X1 [Trachymyrmex cornetzi]	156	689	117	226	377	1435	309	249	494	306	267	274	229	60	192
CrematogasterSubCLCMeta_c907	ref|XP_020806501.1| LOW QUALITY PROTEIN: glutamate receptor ionotropic, kainate 2 [Drosophila serrata]	0	0	0	0	20	0	0	0	0	0	3	0	12	0	0
CrematogasterSubCLCMeta_rep_c908	ref|XP_011156612.1| PREDICTED: dolichyl-diphosphooligosaccharide--protein glycosyltransferase subunit 1 [Solenopsis invicta]	1807	1018	1203	1148	1221	610	820	1048	687	564	907	591	561	771	951
CrematogasterSubCLCMeta_c909	ref|XP_022125567.1| RE1-silencing transcription factor B-like [Pieris rapae]	0	20	0	0	4	11	24	0	17	0	17	4	2	0	13
CrematogasterSubCLCMeta_c910	ref|XP_016906961.1| PREDICTED: beta-amyloid-like protein isoform X1 [Apis cerana]	95	280	235	72	111	558	221	58	223	81	272	225	197	78	364
CrematogasterSubCLCMeta_rep_c911	ref|XP_011869095.1| PREDICTED: cytochrome P450 CYP12A2-like [Vollenhovia emeryi]	6510	986	3749	7876	3260	4293	5665	6156	8080	4108	550	1861	1172	1402	2646
CrematogasterSubCLCMeta_c912	#N/A	0	6	0	0	25	3	0	0	0	0	0	0	0	0	8
CrematogasterSubCLCMeta_c913	ref|XP_011066408.1| PREDICTED: oxidation resistance protein 1 [Acromyrmex echinatior]	73	34	216	162	196	143	191	104	221	292	160	128	148	148	161
CrematogasterSubCLCMeta_c914	ref|XP_017955101.1| PREDICTED: laminin subunit alpha isoform X1 [Drosophila navojoa]	42	36	43	25	20	12	23	18	26	14	40	53	12	26	46
CrematogasterSubCLCMeta_rep_c915	ref|XP_018367172.1| PREDICTED: ejaculatory bulb-specific protein 3-like [Trachymyrmex cornetzi]	43	54	0	10	38	72	21	50	52	0	3	56	34	20	31
CrematogasterSubCLCMeta_c916	ref|XP_011703772.1| PREDICTED: zinc finger protein 568-like [Wasmannia auropunctata]	245	243	223	292	281	992	320	245	295	338	487	294	250	127	301
CrematogasterSubCLCMeta_c917	ref|XP_011858480.1| PREDICTED: RNA-directed DNA polymerase from mobile element jockey-like [Vollenhovia emeryi]	10	5156	115	7	2	3783	7	0	0	6	5	9	4	78	2
CrematogasterSubCLCMeta_c918	ref|XP_011173076.1| PREDICTED: uncharacterized protein LOC105205408 [Solenopsis invicta]	26	857	109	65	737	783	805	32	1090	66	784	521	86	77	757
CrematogasterSubCLCMeta_c919	#N/A	0	12	0	0	10	13	8	0	23	0	30	6	2	0	21
CrematogasterSubCLCMeta_rep_c920	#N/A	13	31	9	53	6	14	16	9	10	16	147	1	58	109	8
CrematogasterSubCLCMeta_c921	#N/A	7	2	15	4	9	36	1	13	11	0	2	5	14	17	13
CrematogasterSubCLCMeta_rep_c922	ref|XP_019697012.1| PREDICTED: LOW QUALITY PROTEIN: uncharacterized protein LOC109503857, partial [Harpegnathos saltator]	2	32	32	0	0	0	25	6	0	20	0	0	0	0	31
CrematogasterSubCLCMeta_rep_c923	ref|XP_018316547.1| PREDICTED: octopamine receptor Oamb isoform X2 [Trachymyrmex zeteki]	7	85	89	0	54	70	57	13	46	24	39	111	12	17	119
CrematogasterSubCLCMeta_c924	#N/A	0	26	0	0	19	30	15	4	15	0	3	6	6	5	17
CrematogasterSubCLCMeta_c925	ref|XP_018346566.1| PREDICTED: importin subunit beta-1 isoform X3 [Trachymyrmex septentrionalis]	177	155	143	97	127	184	276	152	194	6	609	76	144	112	180
CrematogasterSubCLCMeta_rep_c926	ref|XP_015016308.1| uncharacterized protein Dmoj_GI25664 [Drosophila mojavensis]	0	0	1	22	15	0	17	0	0	24	14	0	5	3	9
CrematogasterSubCLCMeta_c927	#N/A	23	1	29	22	4	10	12	2	13	0	31	9	5	10	7
CrematogasterSubCLCMeta_rep_c928	ref|XP_017481747.1| PREDICTED: uncharacterized protein LOC108370842 [Rhagoletis zephyria]	18	14	0	12	33	9	60	15	24	71	46	4	22	32	21
CrematogasterSubCLCMeta_c929	#N/A	4	0	0	0	0	0	16	2	1	5	0	0	2	13	0
CrematogasterSubCLCMeta_c930	ref|XP_012540661.1| PREDICTED: uncharacterized protein LOC105839129 [Monomorium pharaonis]	12	28	38	24	30	316	26	28	78	24	1161	72	17	48	73
CrematogasterSubCLCMeta_c931	ref|XP_011690685.1| PREDICTED: uncharacterized protein LOC105451739 [Wasmannia auropunctata]	111	528	1	1	9	0	0	333	64	1	31	0	1011	49	3
CrematogasterSubCLCMeta_c932	ref|XP_011868417.1| PREDICTED: extensin-like isoform X1 [Vollenhovia emeryi]	1083	1066	1889	1595	1604	1771	1352	890	1408	1197	1380	1078	1188	1232	1702
CrematogasterSubCLCMeta_c933	ref|XP_011162029.1| PREDICTED: basic helix-loop-helix domain-containing protein KIAA2018 [Solenopsis invicta]	0	0	0	0	0	12	15	0	9	0	0	0	0	0	3
CrematogasterSubCLCMeta_c934	ref|XP_018654666.1| hypothetical protein Smp_170040 [Schistosoma mansoni]	0	5	7	0	16	22	53	4	36	21	32	16	0	0	15
CrematogasterSubCLCMeta_c935	ref|XP_011174972.1| PREDICTED: uncharacterized protein LOC105207242, partial [Solenopsis invicta]	0	9	8	0	25	0	4	1	201	0	20	0	14	0	2
CrematogasterSubCLCMeta_rep_c936	ref|XP_011873296.1| PREDICTED: uncharacterized protein LOC105565058 isoform X2 [Vollenhovia emeryi]	42	1535	0	0	4	6	67	682	24	0	5	396	3572	83	6
CrematogasterSubCLCMeta_c937	ref|XP_018403945.1| PREDICTED: TLD domain-containing protein 2 isoform X10 [Cyphomyrmex costatus]	21	7	20	16	21	18	28	39	11	0	0	13	14	0	41
CrematogasterSubCLCMeta_rep_c938	ref|XP_011860400.1| PREDICTED: inosine-5'-monophosphate dehydrogenase [Vollenhovia emeryi]	1	157	354	0	0	57	87	32	24	0	154	224	42	111	205
CrematogasterSubCLCMeta_c939	ref|XP_019882699.1| PREDICTED: L-aminoadipate-semialdehyde dehydrogenase-phosphopantetheinyl transferase [Camponotus floridanus]	216	204	317	171	264	260	92	86	118	342	190	206	158	193	164
CrematogasterSubCLCMeta_c940	ref|XP_011631136.1| PREDICTED: broad-complex core protein isoform 6 isoform X3 [Pogonomyrmex barbatus]	0	0	0	0	9	13	7	0	11	1	15	4	7	2	0
CrematogasterSubCLCMeta_c941	ref|XP_022791462.1| LOW QUALITY PROTEIN: calcium-dependent secretion activator 1-like [Stylophora pistillata]	27	15	13	7	9	0	1	11	5	0	0	10	2	0	16
CrematogasterSubCLCMeta_c942	ref|XP_012342044.1| PREDICTED: valine--tRNA ligase, mitochondrial isoform X2 [Apis florea]	26	8	4	0	9	22	10	10	8	0	13	22	2	0	19
CrematogasterSubCLCMeta_rep_c943	#N/A	24	40	41	24	21	33	24	4	13	9	94	9	42	19	17
CrematogasterSubCLCMeta_rep_c944	ref|XP_019882431.1| PREDICTED: peroxisomal hydratase-dehydrogenase-epimerase [Camponotus floridanus]	0	0	14	16	13	9	28	8	7	7	3	10	9	5	14
CrematogasterSubCLCMeta_rep_c945	ref|XP_011700636.1| PREDICTED: glucose dehydrogenase [FAD, quinone]-like [Wasmannia auropunctata]	301	1481	1843	816	284	441	272	243	179	248	33	2120	364	6260	2464
CrematogasterSubCLCMeta_c946	ref|XP_011877263.1| PREDICTED: eukaryotic translation initiation factor 2 subunit 2 isoform X3 [Vollenhovia emeryi]	783	128	31	642	1540	804	434	749	1060	923	1157	5	1199	37	25
CrematogasterSubCLCMeta_rep_c947	ref|XP_012533816.1| PREDICTED: uncharacterized protein LOC105835261 [Monomorium pharaonis]	89	309	554	236	194	165	310	65	253	165	189	238	223	230	289
CrematogasterSubCLCMeta_c948	#N/A	0	0	10	0	0	14	3	3	10	37	21	6	5	52	2
CrematogasterSubCLCMeta_c949	ref|XP_018365855.1| PREDICTED: uncharacterized protein LOC108763052 [Trachymyrmex cornetzi]	15	0	0	0	13	0	24	29	15	35	7	0	4	0	0
CrematogasterSubCLCMeta_rep_c950	ref|XP_011269336.1| PREDICTED: very-long-chain enoyl-CoA reductase [Camponotus floridanus]	0	0	10	13	8	3	14	5	3	7	6	9	5	8	0
CrematogasterSubCLCMeta_c951	ref|XP_002638272.1| Hypothetical protein CBG22812 [Caenorhabditis briggsae]	13	0	7	0	8	9	0	0	0	26	2	4	0	11	2
CrematogasterSubCLCMeta_c952	ref|XP_012527790.1| PREDICTED: uncharacterized protein LOC105831884, partial [Monomorium pharaonis]	26	128	126	23	50	0	21	47	29	19	76	32	25	10	4
CrematogasterSubCLCMeta_c953	ref|XP_015111625.1| PREDICTED: testis-expressed sequence 9 protein-like isoform X2 [Diachasma alloeum]	18	57	20	14	20	29	0	17	14	14	6	16	19	10	21
CrematogasterSubCLCMeta_c954	ref|XP_018397868.1| PREDICTED: uncharacterized protein LOC108775902 [Cyphomyrmex costatus]	1830	1970	2778	2398	2284	2141	2461	1996	2386	1630	3305	2026	2318	2466	2625
CrematogasterSubCLCMeta_rep_c955	ref|XP_011880641.1| PREDICTED: arf-GAP with coiled-coil, ANK repeat and PH domain-containing protein 2 [Vollenhovia emeryi]	62	177	72	224	95	66	96	129	184	0	278	39	82	92	175
CrematogasterSubCLCMeta_rep_c956	ref|XP_011864351.1| PREDICTED: uncharacterized protein LOC105560126 isoform X4 [Vollenhovia emeryi]	54	294	220	175	38	975	0	27	13	0	78	169	47	293	258
CrematogasterSubCLCMeta_rep_c957	ref|XP_012527207.1| PREDICTED: coronin-6 [Monomorium pharaonis]	684	438	1855	1107	588	693	1011	806	1343	1221	600	780	1191	1215	818
CrematogasterSubCLCMeta_rep_c958	ref|XP_018354379.1| PREDICTED: F-BAR domain only protein 2 isoform X2 [Trachymyrmex septentrionalis]	71	170	262	192	206	718	281	200	422	33	380	196	292	191	342
CrematogasterSubCLCMeta_rep_c959	ref|XP_022787869.1| dimethylglycine dehydrogenase, mitochondrial-like isoform X1 [Stylophora pistillata]	41	100	96	107	37	176	50	43	82	120	132	103	69	34	66
CrematogasterSubCLCMeta_rep_c960	ref|XP_011692580.1| PREDICTED: chromodomain-helicase-DNA-binding protein 1 isoform X3 [Wasmannia auropunctata]	240	204	218	3	108	539	115	109	150	0	82	48	54	0	116
CrematogasterSubCLCMeta_c961	#N/A	160	130	189	91	138	170	218	88	226	131	405	204	182	159	166
CrematogasterSubCLCMeta_rep_c962	ref|XP_018306216.1| PREDICTED: cytochrome b5-like [Trachymyrmex zeteki]	7899	18	69	3641	13278	747	4986	12526	4036	472	1219	39	44	71	50
CrematogasterSubCLCMeta_rep_c963	ref|XP_018374410.1| PREDICTED: alanine--glyoxylate aminotransferase 2-like isoform X2 [Trachymyrmex cornetzi]	764	2242	1778	447	798	357	1228	3273	2596	489	681	1093	2226	765	517
CrematogasterSubCLCMeta_rep_c964	ref|XP_011872567.1| PREDICTED: uncharacterized protein LOC105564646 [Vollenhovia emeryi]	0	1031	4918	0	6	1326	0	6	17	0	0	3165	20	45	1225
CrematogasterSubCLCMeta_c965	ref|XP_018398228.1| PREDICTED: LOW QUALITY PROTEIN: ras-related protein Rab-5B-like [Cyphomyrmex costatus]	187	214	154	160	351	366	231	214	236	142	297	288	380	202	194
CrematogasterSubCLCMeta_rep_c966	ref|XP_018392991.1| PREDICTED: protein charybde-like [Cyphomyrmex costatus]	2490	1664	1583	2381	1592	1781	1696	2012	1617	2273	1231	2418	1604	1552	2631
CrematogasterSubCLCMeta_rep_c967	ref|XP_018306631.1| PREDICTED: calcium-activated potassium channel slowpoke isoform X7 [Trachymyrmex zeteki]	474	718	960	867	890	1843	411	834	1030	407	715	525	662	560	1027
CrematogasterSubCLCMeta_rep_c968	ref|XP_011883379.1| PREDICTED: 40S ribosomal protein S15Aa [Vollenhovia emeryi]	49	118	108	54	30	287	55	32	69	39	234	93	52	74	100
CrematogasterSubCLCMeta_c969	ref|XP_011861781.1| PREDICTED: spastin isoform X1 [Vollenhovia emeryi]	184	70	225	266	261	95	380	90	373	507	361	249	244	215	379
CrematogasterSubCLCMeta_rep_c970	ref|XP_012217987.1| PREDICTED: zinc transporter 2-like isoform X3 [Linepithema humile]	146	189	239	107	143	164	137	122	132	7	1569	220	254	636	171
CrematogasterSubCLCMeta_c971	ref|XP_014474131.1| PREDICTED: uncharacterized protein K02A2.6-like isoform X2 [Dinoponera quadriceps]	1157	32	47	1183	2119	9	1380	719	1022	941	863	29	1220	26	118
CrematogasterSubCLCMeta_c972	ref|XP_012534710.1| PREDICTED: F-box only protein 32 [Monomorium pharaonis]	227	494	386	173	161	529	224	147	377	595	453	990	1291	777	1063
CrematogasterSubCLCMeta_rep_c974	ref|XP_011882044.1| PREDICTED: uncharacterized protein LOC105569870 isoform X1 [Vollenhovia emeryi]	5811	4192	7907	3580	4096	4139	3475	2253	3953	3474	974	7248	2825	2510	9825
CrematogasterSubCLCMeta_c975	ref|XP_011692068.1| PREDICTED: furin-like protease 2 isoform X1 [Wasmannia auropunctata]	1436	157	1458	2936	2144	1223	1954	2804	867	780	1934	893	1652	974	1118
CrematogasterSubCLCMeta_rep_c976	ref|XP_011176141.1| PREDICTED: kinase suppressor of Ras 2 isoform X2 [Solenopsis invicta]	0	22	63	98	57	53	31	18	58	121	73	15	8	30	28
CrematogasterSubCLCMeta_c977	ref|XP_011055054.1| PREDICTED: atypical protein kinase C isoform X1 [Acromyrmex echinatior]	97	216	537	0	152	187	112	78	212	6	244	549	162	530	792
CrematogasterSubCLCMeta_rep_c978	ref|XP_011870388.1| PREDICTED: zinc finger protein 34-like isoform X2 [Vollenhovia emeryi]	293	219	170	185	314	568	393	195	368	213	1122	248	534	293	225
CrematogasterSubCLCMeta_c980	ref|XP_012526093.1| PREDICTED: Down syndrome cell adhesion molecule-like protein Dscam2 isoform X26 [Monomorium pharaonis]	451	472	244	483	512	495	751	362	975	207	1435	281	293	518	639
CrematogasterSubCLCMeta_c981	ref|XP_018312675.1| PREDICTED: plexin-B [Trachymyrmex zeteki]	13	36	58	57	26	41	48	19	24	0	23	35	41	57	97
CrematogasterSubCLCMeta_rep_c982	ref|XP_011686586.1| PREDICTED: longitudinals lacking protein, isoforms A/B/D/L isoform X21 [Wasmannia auropunctata]	309	802	907	693	1038	2428	1033	771	1074	1378	2112	1146	742	852	1122
CrematogasterSubCLCMeta_rep_c983	ref|XP_018371898.1| PREDICTED: uncharacterized protein LOC108766861 [Trachymyrmex cornetzi]	6494	6410	8146	6421	4042	10532	3813	4626	8495	7807	4006	3608	6824	5161	10996
CrematogasterSubCLCMeta_rep_c984	#N/A	2	279	47	60	264	330	377	56	415	0	278	460	98	155	329
CrematogasterSubCLCMeta_rep_c985	ref|XP_011862723.1| PREDICTED: programmed cell death 6-interacting protein isoform X2 [Vollenhovia emeryi]	2587	1776	2407	2044	2943	2115	2403	2074	2174	2358	3850	2784	2249	2273	3076
CrematogasterSubCLCMeta_rep_c986	ref|XP_011875338.1| PREDICTED: zinc finger matrin-type protein CG9776 [Vollenhovia emeryi]	931	375	244	722	785	3094	851	775	417	1261	960	509	602	364	219
CrematogasterSubCLCMeta_rep_c987	ref|XP_011634856.1| PREDICTED: serine/threonine-protein phosphatase 2A 56 kDa regulatory subunit gamma isoform isoform X2 [Pogonomyrmex barbatus]	285	649	703	539	315	1125	398	278	628	355	932	1019	457	796	1233
CrematogasterSubCLCMeta_rep_c988	ref|XP_018376122.1| PREDICTED: semaphorin-1A isoform X2 [Trachymyrmex cornetzi]	106	269	152	65	190	448	361	63	436	71	398	157	238	118	417
CrematogasterSubCLCMeta_rep_c989	ref|XP_020716164.1| uncharacterized protein LOC101453534, partial [Ceratitis capitata]	612	155	18	2497	489	1	0	599	674	723	3	190	203	3	137
CrematogasterSubCLCMeta_rep_c990	ref|XP_011872094.1| PREDICTED: lysine-specific demethylase 4C-like isoform X2 [Vollenhovia emeryi]	1233	272	290	1531	1504	1404	1334	1450	1866	1611	3771	225	103	185	322
CrematogasterSubCLCMeta_rep_c991	ref|XP_018399269.1| PREDICTED: cytochrome P450 4g15 [Cyphomyrmex costatus]	108989	90694	45214	190611	161697	8491	107064	110261	84326	174758	36279	109456	71803	103958	97087
CrematogasterSubCLCMeta_rep_c992	ref|XP_018317967.1| PREDICTED: putative nuclease HARBI1, partial [Trachymyrmex zeteki]	376	237	252	282	562	19	312	402	287	95	286	352	237	236	244
CrematogasterSubCLCMeta_rep_c993	ref|XP_011878987.1| PREDICTED: uncharacterized protein LOC105568161 isoform X6 [Vollenhovia emeryi]	1450	2015	1458	2139	1612	2152	3201	1893	2461	1659	4796	2645	2138	4123	3268
CrematogasterSubCLCMeta_rep_c994	ref|XP_011883778.1| PREDICTED: uncharacterized protein LOC105570936, partial [Vollenhovia emeryi]	194	156	295	155	222	11	371	235	286	179	326	245	297	184	183
CrematogasterSubCLCMeta_rep_c995	ref|XP_012542861.1| PREDICTED: cytosolic 10-formyltetrahydrofolate dehydrogenase isoform X1 [Monomorium pharaonis]	450	467	3089	125	257	2007	454	619	2001	691	210	210	142	177	631
CrematogasterSubCLCMeta_rep_c996	#N/A	83	5	76	4	327	7	363	257	350	103	87	51	461	16	58
CrematogasterSubCLCMeta_rep_c997	ref|XP_011055724.1| PREDICTED: solute carrier family 2, facilitated glucose transporter member 1-like isoform X4 [Acromyrmex echinatior]	1266	922	733	1757	1868	2066	1357	1146	1512	1252	851	1083	1343	2380	1003
CrematogasterSubCLCMeta_rep_c998	#N/A	10	50	24	103	127	64	102	15	181	72	173	31	23	53	66
CrematogasterSubCLCMeta_rep_c999	#N/A	32	78	55	0	75	56	48	1	22	28	116	128	25	18	66
CrematogasterSubCLCMeta_rep_c1000	ref|XP_011868014.1| PREDICTED: centrosomal protein of 290 kDa isoform X1 [Vollenhovia emeryi]	75	212	203	88	185	176	137	83	214	182	272	193	141	181	285
CrematogasterSubCLCMeta_rep_c1001	ref|XP_018314866.1| PREDICTED: LOW QUALITY PROTEIN: protein expanded-like [Trachymyrmex zeteki]	91	15	149	62	71	110	48	45	58	134	648	27	596	78	66
CrematogasterSubCLCMeta_rep_c1002	ref|XP_022796208.1| LOW QUALITY PROTEIN: uncharacterized protein LOC111334664 [Stylophora pistillata]	32	10	1219	1096	222	768	288	147	465	77	60	218	389	1997	354
CrematogasterSubCLCMeta_rep_c1003	ref|XP_011863758.1| PREDICTED: probable myosin heavy chain ECU04_1000 isoform X3 [Vollenhovia emeryi]	345	123	340	131	464	220	203	192	88	222	34	222	463	41	128
CrematogasterSubCLCMeta_rep_c1004	ref|XP_018367575.1| PREDICTED: transmembrane protein 62-like [Trachymyrmex cornetzi]	73	265	214	14	259	818	336	27	451	47	336	311	7	109	368
CrematogasterSubCLCMeta_rep_c1005	ref|XP_011877629.1| PREDICTED: scavenger receptor class B member 1 isoform X2 [Vollenhovia emeryi]	10472	1035	1710	5031	5660	849	3252	6912	6233	2498	211	1489	1870	524	2269
CrematogasterSubCLCMeta_rep_c1006	ref|XP_018364549.1| PREDICTED: E3 ubiquitin-protein ligase TRIP12 isoform X3 [Trachymyrmex cornetzi]	3440	4918	4467	4476	4802	5345	3292	4452	3905	4931	5011	4824	4560	5172	6545
CrematogasterSubCLCMeta_rep_c1007	#N/A	2177	2634	2050	2167	2842	3201	2199	2452	1962	2222	3263	2547	2122	1584	2206
CrematogasterSubCLCMeta_rep_c1008	ref|XP_018308213.1| PREDICTED: WD repeat-containing protein 34-like [Trachymyrmex zeteki]	514	790	791	585	738	1298	871	656	800	445	872	591	1111	814	1418
CrematogasterSubCLCMeta_rep_c1009	ref|XP_011876664.1| PREDICTED: brefeldin A-inhibited guanine nucleotide-exchange protein 3 isoform X1 [Vollenhovia emeryi]	64	625	217	132	817	709	849	119	1177	170	913	608	261	224	725
CrematogasterSubCLCMeta_rep_c1010	ref|XP_012525833.1| PREDICTED: tropomyosin-2, partial [Monomorium pharaonis]	4890	3748	5044	5046	3988	4107	5883	5171	4833	5163	5909	3523	8576	4342	3532
CrematogasterSubCLCMeta_rep_c1011	ref|XP_019884868.1| PREDICTED: zinc finger protein 37 isoform X2 [Camponotus floridanus]	435	129	203	632	452	224	533	322	523	597	814	97	539	193	116
CrematogasterSubCLCMeta_rep_c1012	ref|XP_011168338.1| PREDICTED: L-xylulose reductase [Solenopsis invicta]	1971	1742	1435	1088	1506	1818	1144	2385	1803	1171	1242	1560	1623	2303	2054
CrematogasterSubCLCMeta_rep_c1013	ref|XP_011696732.1| PREDICTED: uncharacterized protein LOC105455244 [Wasmannia auropunctata]	1881	1244	1385	2149	2332	1748	2564	1836	1909	2095	1237	1763	1118	2589	2424
CrematogasterSubCLCMeta_rep_c1014	ref|XP_012523745.1| PREDICTED: gastrulation defective protein 1 homolog [Monomorium pharaonis]	3803	2503	3443	4339	3698	4900	2795	2499	3460	3675	2635	2497	2965	2694	2944
CrematogasterSubCLCMeta_rep_c1015	ref|XP_011875201.1| PREDICTED: vacuolar protein sorting-associated protein 11 homolog [Vollenhovia emeryi]	4012	4295	3619	4088	4835	4600	4098	2920	4645	3317	4421	4646	4641	4784	5372
CrematogasterSubCLCMeta_rep_c1016	ref|XP_011880909.1| PREDICTED: dedicator of cytokinesis protein 1 isoform X5 [Vollenhovia emeryi]	2234	2438	2076	2615	2481	3954	2394	2881	2915	2448	2601	2872	3173	4124	3549
CrematogasterSubCLCMeta_rep_c1017	ref|XP_011266091.1| PREDICTED: uncharacterized protein LOC105257276 isoform X5 [Camponotus floridanus]	963	1415	1092	1537	1361	2086	1730	1532	2411	1305	1027	959	1107	1164	1535
CrematogasterSubCLCMeta_rep_c1018	ref|XP_018397551.1| PREDICTED: tubulin gamma-2 chain [Cyphomyrmex costatus]	271	108	265	394	312	216	266	246	279	331	360	307	279	132	296
CrematogasterSubCLCMeta_rep_c1019	ref|XP_018397551.1| PREDICTED: tubulin gamma-2 chain [Cyphomyrmex costatus]	651	665	920	475	770	778	829	548	823	767	939	819	711	701	966
CrematogasterSubCLCMeta_rep_c1020	ref|XP_018366657.1| PREDICTED: kinesin-like protein KIF13A isoform X6 [Trachymyrmex cornetzi]	2189	2194	2741	2446	3071	2523	2901	2267	3326	1881	3011	2242	2360	2231	3135
CrematogasterSubCLCMeta_rep_c1021	#N/A	114	108	94	117	70	326	218	148	152	219	83	263	166	117	128
CrematogasterSubCLCMeta_rep_c1022	#N/A	447	389	915	361	698	871	538	405	653	414	2960	712	1397	221	644
CrematogasterSubCLCMeta_rep_c1023	ref|XP_011704185.1| PREDICTED: ATP-binding cassette sub-family G member 1-like [Wasmannia auropunctata]	31	66	119	100	150	920	122	136	140	297	138	235	405	108	85
CrematogasterSubCLCMeta_rep_c1024	ref|XP_011863605.1| PREDICTED: uncharacterized protein LOC105559709, partial [Vollenhovia emeryi]	3619	812	2956	4908	3074	2935	3147	4916	4054	3696	2724	795	3081	1358	1109
CrematogasterSubCLCMeta_rep_c1025	ref|XP_011158190.1| PREDICTED: 2',5'-phosphodiesterase 12 isoform X1 [Solenopsis invicta]	1362	910	1641	1546	1589	2094	1494	1206	1762	1409	1337	719	1534	742	1212
CrematogasterSubCLCMeta_rep_c1026	ref|XP_011870907.1| PREDICTED: uncharacterized protein LOC105563703 isoform X1 [Vollenhovia emeryi]	852	935	1210	1146	1254	468	1123	966	1444	1147	1993	1554	1211	1433	1495
CrematogasterSubCLCMeta_rep_c1027	ref|XP_011864746.1| PREDICTED: nesprin-1 isoform X5 [Vollenhovia emeryi]	7449	3209	3606	5391	5370	4471	7818	6480	10548	4968	9071	2117	11319	3575	5382
CrematogasterSubCLCMeta_rep_c1028	ref|XP_011157983.1| PREDICTED: nucleolysin TIAR isoform X5 [Solenopsis invicta]	88	307	203	149	107	294	286	67	252	0	337	465	148	163	459
CrematogasterSubCLCMeta_rep_c1029	ref|XP_018359878.1| PREDICTED: pyroglutamylated RFamide peptide receptor-like isoform X3 [Trachymyrmex cornetzi]	114	67	49	56	125	1288	150	70	131	95	222	196	112	140	124
CrematogasterSubCLCMeta_c1030	ref|XP_011164536.1| PREDICTED: protein sidekick [Solenopsis invicta]	316	254	455	244	181	339	238	145	299	173	292	222	550	276	334
CrematogasterSubCLCMeta_rep_c1031	ref|XP_018393503.1| PREDICTED: apolipophorins [Cyphomyrmex costatus]	14014	1265	743	4492	71026	18642	64750	93268	187737	137635	68180	995	72478	468	759
CrematogasterSubCLCMeta_rep_c1032	ref|XP_018400616.1| PREDICTED: PAB-dependent poly(A)-specific ribonuclease subunit PAN3 [Cyphomyrmex costatus]	4011	3716	3951	4411	6106	4686	6359	3094	5018	3267	4579	4259	4916	3820	4322
CrematogasterSubCLCMeta_rep_c1033	ref|XP_011698385.1| PREDICTED: CUGBP Elav-like family member 2 isoform X2 [Wasmannia auropunctata]	895	977	1942	1363	1049	1838	992	901	1209	866	585	896	2434	1540	1622
CrematogasterSubCLCMeta_rep_c1034	ref|XP_011693544.1| PREDICTED: probable 4-coumarate--CoA ligase 3 [Wasmannia auropunctata]	2244	978	1252	2061	1061	478	1432	1736	1301	1572	488	875	1188	1811	1596
CrematogasterSubCLCMeta_rep_c1035	ref|XP_011867498.1| PREDICTED: roundabout homolog 2-like [Vollenhovia emeryi]	160	137	156	134	253	285	215	234	377	103	539	183	267	190	321
CrematogasterSubCLCMeta_rep_c1036	ref|XP_011866637.1| PREDICTED: UPF0505 protein C16orf62 homolog [Vollenhovia emeryi]	1062	1698	798	779	1681	1728	1761	1164	1876	792	1526	1415	1088	931	1723
CrematogasterSubCLCMeta_rep_c1037	ref|XP_018307174.1| PREDICTED: high affinity cAMP-specific and IBMX-insensitive 3',5'-cyclic phosphodiesterase 8A-like isoform X4 [Trachymyrmex zeteki]	16082	4567	12585	17407	12635	28068	23357	18349	23637	10292	7465	10934	9436	7157	9175
CrematogasterSubCLCMeta_rep_c1038	ref|XP_011866365.1| PREDICTED: phospholipase A-2-activating protein [Vollenhovia emeryi]	839	424	581	1014	964	621	1019	620	1166	486	1551	630	954	681	729
CrematogasterSubCLCMeta_rep_c1039	ref|XP_011874547.1| PREDICTED: transportin-3 [Vollenhovia emeryi]	8426	8253	11406	12496	10110	9396	9731	8776	8849	10758	9613	9980	9464	9814	9390
CrematogasterSubCLCMeta_rep_c1040	ref|XP_018398036.1| PREDICTED: uncharacterized protein LOC108776036 [Cyphomyrmex costatus]	6023	4289	5282	6141	5189	4830	5030	4938	6217	5372	6806	5202	5345	5376	5609
CrematogasterSubCLCMeta_c1041	ref|XP_008554272.1| PREDICTED: uncharacterized protein LOC103576028 [Microplitis demolitor]	254	454	580	288	497	436	317	338	307	398	451	332	341	429	395
CrematogasterSubCLCMeta_rep_c1042	ref|XP_018313087.1| PREDICTED: transcription factor CP2-like protein 1 isoform X3 [Trachymyrmex zeteki]	4308	4155	3971	3456	2877	3737	3032	3525	2968	3170	2495	3654	3599	2933	3139
CrematogasterSubCLCMeta_rep_c1043	ref|XP_011629712.1| PREDICTED: UDP-glucuronosyltransferase 1-9-like [Pogonomyrmex barbatus]	321	134	162	272	222	323	294	260	414	127	135	137	306	363	223
CrematogasterSubCLCMeta_rep_c1044	ref|XP_011882441.1| PREDICTED: LOW QUALITY PROTEIN: xanthine dehydrogenase/oxidase-like [Vollenhovia emeryi]	886	77	98	144	293	480	122	98	158	310	236	175	257	113	102
CrematogasterSubCLCMeta_rep_c1045	#N/A	24	74	15	19	96	109	148	27	129	93	89	87	48	50	101
CrematogasterSubCLCMeta_rep_c1046	ref|XP_011879142.1| PREDICTED: dnaJ homolog subfamily B member 6 [Vollenhovia emeryi]	3124	3052	4495	3325	3238	3766	3016	3454	3776	3108	2886	3551	4077	3171	3187
CrematogasterSubCLCMeta_rep_c1047	ref|XP_018406944.1| PREDICTED: protein turtle-like isoform X4 [Cyphomyrmex costatus]	6	133	33	35	209	236	114	45	284	10	184	47	32	48	279
CrematogasterSubCLCMeta_rep_c1048	ref|XP_011686206.1| PREDICTED: sodium-independent sulfate anion transporter-like [Wasmannia auropunctata]	166	93	191	149	92	154	158	185	92	76	272	93	314	230	136
CrematogasterSubCLCMeta_rep_c1049	ref|XP_011703211.1| PREDICTED: oxysterol-binding protein 1 isoform X2 [Wasmannia auropunctata]	3386	2171	2719	3979	2996	4644	2588	3084	3607	2971	3174	1988	3564	2490	3028
CrematogasterSubCLCMeta_rep_c1050	ref|XP_011872207.1| PREDICTED: uncharacterized protein LOC105564451 isoform X3 [Vollenhovia emeryi]	403	537	928	364	332	513	275	343	235	309	257	888	400	704	1271
CrematogasterSubCLCMeta_rep_c1051	ref|XP_011872212.1| PREDICTED: uncharacterized protein DDB_G0284459 isoform X4 [Vollenhovia emeryi]	153	37	128	252	191	0	269	412	172	81	222	58	354	135	222
CrematogasterSubCLCMeta_rep_c1052	ref|XP_011880990.1| PREDICTED: E3 ubiquitin-protein ligase MYCBP2 isoform X2 [Vollenhovia emeryi]	207	225	231	94	163	653	141	166	289	151	481	126	301	380	479
CrematogasterSubCLCMeta_rep_c1053	ref|XP_011165941.1| PREDICTED: dystrotelin-like [Solenopsis invicta]	246	263	264	195	380	161	267	108	223	372	318	197	292	132	338
CrematogasterSubCLCMeta_rep_c1054	ref|XP_012525072.1| PREDICTED: 39S ribosomal protein L37, mitochondrial [Monomorium pharaonis]	1528	1849	1042	1482	1247	9667	868	1363	1092	1465	614	1101	716	2277	1129
CrematogasterSubCLCMeta_rep_c1055	ref|XP_012221444.1| PREDICTED: methionine-R-sulfoxide reductase B1 isoform X2 [Linepithema humile]	13	296	378	42	49	236	0	61	33	407	7	362	372	240	267
CrematogasterSubCLCMeta_rep_c1056	ref|XP_012221443.1| PREDICTED: methionine-R-sulfoxide reductase B1 isoform X1 [Linepithema humile]	1415	1424	1633	1297	1943	1376	1137	1608	1690	1556	1578	1513	1796	2011	1906
CrematogasterSubCLCMeta_rep_c1057	ref|XP_018348628.1| PREDICTED: uncharacterized protein LOC108752340 [Trachymyrmex septentrionalis]	848	430	1054	658	489	851	475	473	588	689	433	260	460	449	824
CrematogasterSubCLCMeta_rep_c1058	ref|XP_012530211.1| PREDICTED: tripartite motif-containing protein 2-like isoform X1 [Monomorium pharaonis]	387	208	37	338	223	529	338	167	302	327	301	102	189	190	124
CrematogasterSubCLCMeta_rep_c1059	ref|XP_018377393.1| PREDICTED: uncharacterized protein LOC108770343 [Trachymyrmex cornetzi]	4	24	7	0	43	247	62	28	86	28	84	47	20	0	88
CrematogasterSubCLCMeta_rep_c1060	ref|XP_011704650.1| PREDICTED: Bloom syndrome protein homolog isoform X2 [Wasmannia auropunctata]	422	534	665	449	525	116	657	490	535	438	917	761	584	314	643
CrematogasterSubCLCMeta_rep_c1061	ref|XP_018314854.1| PREDICTED: uncharacterized protein LOC108729952 [Trachymyrmex zeteki]	609	625	599	869	762	1255	737	518	824	451	1035	640	674	505	889
CrematogasterSubCLCMeta_rep_c1062	ref|XP_018359865.1| PREDICTED: probable E3 ubiquitin-protein ligase HERC4 isoform X1 [Trachymyrmex cornetzi]	394	214	105	379	371	1756	221	183	369	537	595	210	270	218	442
CrematogasterSubCLCMeta_rep_c1063	ref|XP_018317184.1| PREDICTED: probable E3 ubiquitin-protein ligase HERC4 isoform X1 [Trachymyrmex zeteki]	10095	7202	10854	13158	7405	7579	6434	5911	6923	15736	11345	9970	7224	14779	9648
CrematogasterSubCLCMeta_rep_c1064	ref|XP_011870214.1| PREDICTED: uncharacterized protein LOC105563321 [Vollenhovia emeryi]	1032	901	647	878	1135	1787	1252	1105	1891	1220	1117	481	1182	592	1166
CrematogasterSubCLCMeta_rep_c1065	ref|XP_011051685.1| PREDICTED: prolyl 4-hydroxylase subunit alpha-2 isoform X1 [Acromyrmex echinatior]	323	406	304	346	192	830	296	286	309	276	267	220	408	102	197
CrematogasterSubCLCMeta_rep_c1066	ref|XP_018058318.1| PREDICTED: SLIT-ROBO Rho GTPase-activating protein 1-like isoform X2 [Atta colombica]	711	120	362	1470	1112	498	1356	1277	1489	1641	760	388	1528	87	928
CrematogasterSubCLCMeta_rep_c1067	ref|XP_018302648.1| PREDICTED: xenotropic and polytropic retrovirus receptor 1 isoform X1 [Trachymyrmex zeteki]	1767	3660	4183	1649	2156	2410	2638	1762	2806	2453	2088	5285	2249	3890	5124
CrematogasterSubCLCMeta_c1068	ref|XP_018053861.1| PREDICTED: PDZ and LIM domain protein Zasp-like, partial [Atta colombica]	589	842	995	671	459	1094	701	512	579	1076	310	834	1008	1134	514
CrematogasterSubCLCMeta_rep_c1069	ref|XP_012528260.1| PREDICTED: UPF0047 protein C4A8.02c isoform X1 [Monomorium pharaonis]	423	284	920	939	340	554	555	818	834	590	1811	312	897	265	247
CrematogasterSubCLCMeta_rep_c1070	ref|XP_012227970.1| PREDICTED: glycogen synthase kinase-3 beta-like isoform X2 [Linepithema humile]	4444	4452	4919	5472	4935	4572	4319	4361	4204	4510	4217	4875	3789	5593	5230
CrematogasterSubCLCMeta_rep_c1071	ref|XP_011648394.1| PREDICTED: proton-coupled amino acid transporter 4 isoform X2 [Pogonomyrmex barbatus]	1637	1026	1588	2149	1813	1114	1926	1819	2340	3050	2605	1809	3963	1625	1023
CrematogasterSubCLCMeta_rep_c1072	ref|XP_022834878.1| zinc finger MYM-type protein 1-like [Spodoptera litura]	50	8	28	26	46	0	19	39	21	0	156	15	69	45	41
CrematogasterSubCLCMeta_rep_c1073	ref|XP_011876288.1| PREDICTED: WD repeat and HMG-box DNA-binding protein 1 [Vollenhovia emeryi]	287	334	439	402	442	465	538	217	481	451	759	368	612	556	392
CrematogasterSubCLCMeta_rep_c1074	ref|XP_011870081.1| PREDICTED: dynein heavy chain 3, axonemal [Vollenhovia emeryi]	313	263	511	355	566	483	423	427	642	141	605	475	449	78	672
CrematogasterSubCLCMeta_rep_c1075	ref|XP_018313980.1| PREDICTED: MAP7 domain-containing protein 1-like isoform X2 [Trachymyrmex zeteki]	10819	5582	9523	9022	6901	6402	9007	7541	10417	15054	3179	9305	7823	11988	5609
CrematogasterSubCLCMeta_rep_c1076	ref|XP_018347015.1| PREDICTED: microtubule-actin cross-linking factor 1 isoform X13 [Trachymyrmex septentrionalis]	1697	3707	9461	3690	1564	7058	3025	1937	3511	3287	2019	4690	3252	12636	10720
CrematogasterSubCLCMeta_rep_c1077	ref|XP_011866832.1| PREDICTED: U4/U6 small nuclear ribonucleoprotein Prp31 [Vollenhovia emeryi]	172	237	379	137	202	0	110	111	180	405	522	307	131	127	250
CrematogasterSubCLCMeta_rep_c1078	ref|XP_011062077.1| PREDICTED: uncharacterized protein LOC105150592 isoform X1 [Acromyrmex echinatior]	1382	2056	1927	1774	2318	545	2631	1192	3348	856	4293	1590	1536	1398	2589
CrematogasterSubCLCMeta_rep_c1079	ref|XP_011049318.1| PREDICTED: WD and tetratricopeptide repeats protein 1-like [Acromyrmex echinatior]	1369	1406	1702	1345	1602	1961	1721	1182	1827	1475	1870	1881	1859	1677	1744
CrematogasterSubCLCMeta_rep_c1080	ref|XP_018338715.1| PREDICTED: phospholipid scramblase 1-like isoform X1 [Trachymyrmex septentrionalis]	241	9	86	122	135	278	253	32	122	73	99	41	536	27	67
CrematogasterSubCLCMeta_rep_c1081	ref|XP_018306032.1| PREDICTED: uncharacterized protein LOC108724255 [Trachymyrmex zeteki]	794	475	578	1025	861	474	959	852	841	1149	647	806	450	654	940
CrematogasterSubCLCMeta_rep_c1082	ref|XP_011874586.1| PREDICTED: microtubule-associated protein futsch-like isoform X2 [Vollenhovia emeryi]	3352	8842	7844	4297	3840	11048	3857	3352	4433	3217	4020	7838	5189	12484	10252
CrematogasterSubCLCMeta_rep_c1083	ref|XP_011871133.1| PREDICTED: endoribonuclease Dicer [Vollenhovia emeryi]	2330	1536	2205	1434	1644	2099	2727	1573	1724	1121	6248	2034	1992	2484	2651
CrematogasterSubCLCMeta_rep_c1084	ref|XP_011878153.1| PREDICTED: muscle M-line assembly protein unc-89 isoform X3 [Vollenhovia emeryi]	3044	4417	6578	4625	3293	4334	4903	3521	6365	4706	2711	6773	6353	10258	5303
CrematogasterSubCLCMeta_rep_c1085	ref|XP_011867601.1| PREDICTED: uncharacterized protein LOC105561859 isoform X2 [Vollenhovia emeryi]	517	409	509	466	529	539	612	443	471	194	937	422	558	552	609
CrematogasterSubCLCMeta_rep_c1086	ref|XP_018402160.1| PREDICTED: fasciculation and elongation protein zeta-2 [Cyphomyrmex costatus]	114	85	72	109	195	408	123	68	158	13	75	85	82	64	159
CrematogasterSubCLCMeta_rep_c1087	ref|XP_011059817.1| PREDICTED: whirlin isoform X4 [Acromyrmex echinatior]	42	351	72	85	353	316	520	50	590	78	371	327	70	77	358
CrematogasterSubCLCMeta_rep_c1088	ref|XP_018354252.1| PREDICTED: protein stoned-B-like [Trachymyrmex septentrionalis]	203	284	23	262	1775	553	1913	219	1960	255	1853	218	412	64	348
CrematogasterSubCLCMeta_rep_c1089	ref|XP_018368059.1| PREDICTED: myosin heavy chain, muscle isoform X27 [Trachymyrmex cornetzi]	3438	4244	6442	6195	3438	30380	5304	7885	6627	8372	2294	4351	6634	15593	3855
CrematogasterSubCLCMeta_rep_c1090	#N/A	91	178	231	173	264	291	285	93	368	171	236	280	89	105	244
CrematogasterSubCLCMeta_rep_c1091	ref|XP_018401579.1| PREDICTED: TBC1 domain family member 24 isoform X2 [Cyphomyrmex costatus]	26	626	436	126	130	197	166	83	82	325	111	611	71	387	733
CrematogasterSubCLCMeta_rep_c1092	ref|XP_011877163.1| PREDICTED: protein AF-9 [Vollenhovia emeryi]	251	179	491	275	306	2180	341	297	295	284	759	492	680	677	493
CrematogasterSubCLCMeta_rep_c1093	ref|XP_012060017.1| PREDICTED: serine/threonine-protein kinase PLK1-like [Atta cephalotes]	2437	2628	2772	3336	2624	3677	2508	2880	3119	2974	4056	2526	2197	3506	2940
CrematogasterSubCLCMeta_rep_c1094	ref|XP_011634374.1| PREDICTED: uncharacterized protein LOC105425344 isoform X1 [Pogonomyrmex barbatus]	25146	18895	23044	19882	14080	30913	19667	19281	18281	30108	13959	30611	16338	35686	19033
CrematogasterSubCLCMeta_rep_c1095	ref|XP_012533017.1| PREDICTED: ornithine aminotransferase, mitochondrial [Monomorium pharaonis]	735	160	221	88	231	180	456	265	313	136	203	347	1086	418	390
CrematogasterSubCLCMeta_rep_c1096	ref|XP_011882154.1| PREDICTED: multidrug resistance-associated protein 1 isoform X7 [Vollenhovia emeryi]	1071	1141	1441	1777	1039	3107	1105	1141	1498	742	1635	1425	1384	1871	2808
CrematogasterSubCLCMeta_rep_c1097	ref|XP_011636991.1| PREDICTED: LOW QUALITY PROTEIN: cleft lip and palate transmembrane protein 1 homolog [Pogonomyrmex barbatus]	3946	888	893	3136	3313	703	2871	3161	3080	2926	3165	918	3383	886	1270
CrematogasterSubCLCMeta_rep_c1098	ref|XP_011873744.1| PREDICTED: protein unc-80 homolog isoform X3 [Vollenhovia emeryi]	66	479	63	6	509	271	637	46	957	48	684	271	64	9	496
CrematogasterSubCLCMeta_rep_c1099	ref|XP_018317620.1| PREDICTED: uncharacterized protein LOC108731679 isoform X2 [Trachymyrmex zeteki]	1388	1569	1490	1648	1991	2907	1533	1104	1779	1658	2775	1278	1633	992	1155
CrematogasterSubCLCMeta_rep_c1100	ref|XP_011864335.1| PREDICTED: uncharacterized protein LOC105560121 isoform X2 [Vollenhovia emeryi]	802	974	1554	1232	1356	3963	1532	980	1674	1751	1469	1006	1441	1133	1465
CrematogasterSubCLCMeta_rep_c1101	ref|XP_018308709.1| PREDICTED: box A-binding factor-like isoform X3 [Trachymyrmex zeteki]	31	65	42	0	91	602	27	60	73	49	48	23	100	63	58
CrematogasterSubCLCMeta_rep_c1102	ref|XP_012064335.1| PREDICTED: calcium-activated potassium channel slowpoke [Atta cephalotes]	315	271	297	225	440	341	131	189	418	64	213	66	224	134	413
CrematogasterSubCLCMeta_rep_c1103	ref|XP_011870107.1| PREDICTED: probable queuine tRNA-ribosyltransferase isoform X1 [Vollenhovia emeryi]	675	441	597	760	509	645	492	475	509	606	773	760	575	668	589
CrematogasterSubCLCMeta_rep_c1104	ref|XP_018407069.1| PREDICTED: broad-complex core protein isoforms 1/2/3/4/5-like isoform X3 [Cyphomyrmex costatus]	493	474	493	1309	650	535	702	624	816	599	516	785	625	992	593
CrematogasterSubCLCMeta_rep_c1105	ref|XP_011692179.1| PREDICTED: tectonin beta-propeller repeat-containing protein isoform X1 [Wasmannia auropunctata]	1374	1065	1499	1766	1302	1478	1255	931	1440	1412	1130	1300	1436	1712	1677
CrematogasterSubCLCMeta_rep_c1106	ref|XP_018366236.1| PREDICTED: serine/threonine-protein kinase Warts [Trachymyrmex cornetzi]	178	164	134	261	238	337	228	174	194	147	347	90	221	163	241
CrematogasterSubCLCMeta_rep_c1107	ref|XP_011881567.1| PREDICTED: alanine--tRNA ligase, cytoplasmic isoform X2 [Vollenhovia emeryi]	701	409	414	638	687	504	569	693	508	800	1503	495	929	216	341
CrematogasterSubCLCMeta_rep_c1108	ref|XP_018344817.1| PREDICTED: growth factor receptor-bound protein 14-like isoform X1 [Trachymyrmex septentrionalis]	1359	1313	1309	1310	1258	1624	1335	758	1366	502	3676	1158	1035	908	1954
CrematogasterSubCLCMeta_c1109	ref|XP_011158490.1| PREDICTED: H(+)/Cl(-) exchange transporter 7 [Solenopsis invicta]	474	275	508	222	97	432	131	174	315	186	459	486	1038	570	1284
CrematogasterSubCLCMeta_rep_c1110	ref|XP_018366674.1| PREDICTED: phosphatidylinositol 4-phosphate 5-kinase type-1 alpha-like isoform X4 [Trachymyrmex cornetzi]	1832	689	882	1331	1887	552	2088	2234	2223	973	3065	488	2817	495	663
CrematogasterSubCLCMeta_rep_c1111	ref|XP_018401737.1| PREDICTED: uncharacterized protein LOC108778910 [Cyphomyrmex costatus]	600	132	266	634	658	0	682	499	580	462	721	220	666	271	260
CrematogasterSubCLCMeta_rep_c1112	ref|XP_011168531.1| PREDICTED: heat shock 70 kDa protein cognate 4 [Solenopsis invicta]	7456	7454	21028	1063	203	6570	163	4252	8921	9077	3956	11956	699	10728	19445
CrematogasterSubCLCMeta_rep_c1113	#N/A	160	28	99	44	136	145	144	47	181	21	557	49	256	78	136
CrematogasterSubCLCMeta_rep_c1114	ref|XP_011703204.1| PREDICTED: fatty acid synthase [Wasmannia auropunctata]	0	0	39	54	22	35	71	42	8	34	62	11	42	75	18
CrematogasterSubCLCMeta_rep_c1115	ref|XP_018306620.1| PREDICTED: otoferlin-like isoform X1 [Trachymyrmex zeteki]	30	209	34	102	293	391	297	29	428	0	305	198	49	0	266
CrematogasterSubCLCMeta_rep_c1116	ref|XP_011700168.1| PREDICTED: peroxidase-like [Wasmannia auropunctata]	359	357	420	577	332	648	518	571	443	499	578	680	616	1333	721
CrematogasterSubCLCMeta_rep_c1117	ref|XP_011871101.1| PREDICTED: uncharacterized protein LOC105563801 [Vollenhovia emeryi]	137	159	93	42	75	168	119	100	180	96	301	47	255	63	143
CrematogasterSubCLCMeta_c1118	ref|XP_011059249.1| PREDICTED: proteasomal ubiquitin receptor ADRM1-B isoform X1 [Acromyrmex echinatior]	1579	1249	1707	2647	1686	1865	1238	1435	1450	2290	1809	2079	1531	1733	1785
CrematogasterSubCLCMeta_rep_c1119	ref|XP_012537403.1| PREDICTED: NADP-dependent malic enzyme isoform X1 [Monomorium pharaonis]	3209	4040	5502	5743	4073	3498	4174	3884	5353	5369	4976	5925	4936	3995	3512
CrematogasterSubCLCMeta_rep_c1120	ref|XP_011863242.1| PREDICTED: uncharacterized protein LOC105559506 [Vollenhovia emeryi]	508	219	300	553	475	230	447	437	777	687	1173	193	677	268	279
CrematogasterSubCLCMeta_rep_c1121	ref|XP_018399668.1| PREDICTED: transitional endoplasmic reticulum ATPase TER94 [Cyphomyrmex costatus]	2148	2055	2006	1735	2010	5410	1774	2081	2174	2659	2216	2239	2422	2068	2668
CrematogasterSubCLCMeta_rep_c1122	ref|XP_011868565.1| PREDICTED: uncharacterized protein KIAA2013 homolog isoform X1 [Vollenhovia emeryi]	1598	177	1517	173	3170	742	314	173	240	104	325	106	4006	96	270
CrematogasterSubCLCMeta_rep_c1123	ref|XP_018404344.1| PREDICTED: nuclear pore complex protein Nup160 homolog [Cyphomyrmex costatus]	65	19	84	44	76	50	52	31	100	61	1200	48	268	93	50
CrematogasterSubCLCMeta_rep_c1124	ref|XP_012233556.1| PREDICTED: uncharacterized protein LOC105678607 isoform X1 [Linepithema humile]	224	211	224	186	199	274	181	98	309	77	253	142	272	68	228
CrematogasterSubCLCMeta_rep_c1125	ref|XP_011863266.1| PREDICTED: facilitated trehalose transporter Tret1-like [Vollenhovia emeryi]	7008	2944	4272	7868	5898	590	5216	6407	5625	6406	1540	5510	2662	5603	6109
CrematogasterSubCLCMeta_rep_c1126	ref|XP_012232683.1| PREDICTED: transcription factor HIVEP3 isoform X2 [Linepithema humile]	201	85	61	27	49	17	34	49	77	13	9	11	15	72	72
CrematogasterSubCLCMeta_rep_c1127	ref|XP_011869317.1| PREDICTED: protein crumbs isoform X1 [Vollenhovia emeryi]	708	560	1423	605	623	968	813	700	746	438	2004	638	1266	657	653
CrematogasterSubCLCMeta_rep_c1128	#N/A	93	221	100	45	162	370	232	35	289	50	206	214	318	257	361
CrematogasterSubCLCMeta_rep_c1129	ref|XP_018362952.1| PREDICTED: uncharacterized protein LOC108761100 [Trachymyrmex cornetzi]	207	23	54	170	193	48	78	177	141	110	53	127	130	68	156
CrematogasterSubCLCMeta_rep_c1130	#N/A	53	91	42	11	122	67	157	23	145	7	144	136	24	12	67
CrematogasterSubCLCMeta_rep_c1131	ref|XP_011696444.1| PREDICTED: nischarin isoform X1 [Wasmannia auropunctata]	488	180	230	510	481	238	453	120	332	409	231	173	496	195	200
CrematogasterSubCLCMeta_rep_c1132	ref|XP_011875464.1| PREDICTED: disintegrin and metalloproteinase domain-containing protein 22 isoform X1 [Vollenhovia emeryi]	211	309	176	66	734	493	800	97	723	465	1017	513	175	1	562
CrematogasterSubCLCMeta_rep_c1133	ref|XP_011706215.1| PREDICTED: microtubule-associated protein futsch isoform X1 [Wasmannia auropunctata]	919	978	835	1251	1205	2188	832	1024	984	1135	1481	1010	1000	1049	1147
CrematogasterSubCLCMeta_rep_c1134	ref|XP_018339965.1| PREDICTED: protein TRC8 homolog isoform X1 [Trachymyrmex septentrionalis]	1485	433	444	1554	1506	1785	1306	1353	1350	1614	1215	426	1294	0	266
CrematogasterSubCLCMeta_rep_c1135	ref|XP_014474131.1| PREDICTED: uncharacterized protein K02A2.6-like isoform X2 [Dinoponera quadriceps]	2242	3109	3591	3564	3619	72	3804	1286	3394	1457	5551	2571	801	1780	3813
CrematogasterSubCLCMeta_rep_c1136	ref|XP_018341910.1| PREDICTED: uncharacterized protein LOC108748331 isoform X4 [Trachymyrmex septentrionalis]	2	4	0	0	0	864	0	0	10	0	17	28	0	31	0
CrematogasterSubCLCMeta_rep_c1137	ref|XP_011164665.1| PREDICTED: uncharacterized protein LOC105199320 isoform X11 [Solenopsis invicta]	476	489	473	91	1246	976	1822	447	1676	1543	1565	353	2839	645	924
CrematogasterSubCLCMeta_rep_c1138	ref|XP_011874429.1| PREDICTED: uncharacterized protein LOC105565663 [Vollenhovia emeryi]	231	148	60	151	228	119	148	181	186	80	170	69	177	213	166
CrematogasterSubCLCMeta_rep_c1139	ref|XP_018308862.1| PREDICTED: uncharacterized protein LOC108726004 [Trachymyrmex zeteki]	275	836	956	211	334	899	223	201	284	248	1319	804	327	1412	837
CrematogasterSubCLCMeta_rep_c1140	ref|XP_011884002.1| PREDICTED: vacuole membrane protein 1-like isoform X1 [Vollenhovia emeryi]	2324	1340	1669	2438	2134	3313	1628	1928	1803	2451	1222	3061	1826	2617	2404
CrematogasterSubCLCMeta_rep_c1141	ref|XP_018342030.1| PREDICTED: uncharacterized protein C3orf18-like isoform X4 [Trachymyrmex septentrionalis]	1112	382	833	983	1384	912	1398	727	1182	912	970	678	1163	340	730
CrematogasterSubCLCMeta_rep_c1142	ref|XP_012527691.1| PREDICTED: tudor domain-containing protein 7 isoform X2 [Monomorium pharaonis]	33	200	46	122	98	1211	125	17	126	69	138	241	42	159	180
CrematogasterSubCLCMeta_rep_c1143	ref|XP_011158626.1| PREDICTED: E3 ubiquitin-protein ligase RNF123-like isoform X2 [Solenopsis invicta]	865	342	628	722	620	1685	548	791	945	351	1337	562	1360	793	525
CrematogasterSubCLCMeta_rep_c1144	ref|XP_011172427.1| PREDICTED: pre-mRNA-processing-splicing factor 8 [Solenopsis invicta]	2876	3698	4601	3766	2375	4288	2477	3471	2244	2514	5194	3047	2541	4119	4133
CrematogasterSubCLCMeta_rep_c1145	ref|XP_011869504.1| PREDICTED: very long-chain specific acyl-CoA dehydrogenase, mitochondrial [Vollenhovia emeryi]	300	5022	5859	649	113	6777	568	164	88	41	328	2021	390	5892	6682
CrematogasterSubCLCMeta_rep_c1146	ref|XP_011876194.1| PREDICTED: uncharacterized protein LOC105566640 [Vollenhovia emeryi]	54	68	284	172	103	268	175	160	179	126	1170	189	227	155	118
CrematogasterSubCLCMeta_rep_c1147	ref|XP_018402931.1| PREDICTED: troponin T isoform X1 [Cyphomyrmex costatus]	2640	2093	1864	2954	1305	2644	2120	2885	2389	3906	403	1622	3054	1981	910
CrematogasterSubCLCMeta_rep_c1148	ref|XP_011161371.1| PREDICTED: TBC1 domain family member 23 [Solenopsis invicta]	1470	956	1273	1359	1171	643	995	1152	1277	682	2003	1282	1628	1821	1715
CrematogasterSubCLCMeta_rep_c1149	ref|XP_018364354.1| PREDICTED: uncharacterized protein LOC108762050 [Trachymyrmex cornetzi]	94	221	257	179	219	78	147	138	147	219	140	298	122	295	236
CrematogasterSubCLCMeta_rep_c1150	ref|XP_011687562.1| PREDICTED: dihydropyrimidine dehydrogenase [NADP(+)] [Wasmannia auropunctata]	1292	1095	1192	1055	1216	182	1099	993	965	1386	1588	454	1487	710	827
CrematogasterSubCLCMeta_rep_c1151	#N/A	135	146	186	188	82	199	112	155	281	96	116	86	143	378	193
CrematogasterSubCLCMeta_rep_c1152	ref|XP_011881364.1| PREDICTED: uncharacterized protein LOC105569474 isoform X1 [Vollenhovia emeryi]	1834	880	1549	2589	1723	624	1903	1378	1403	1377	1935	526	1430	370	1740
CrematogasterSubCLCMeta_rep_c1153	ref|XP_011630321.1| PREDICTED: dyslexia-associated protein KIAA0319 [Pogonomyrmex barbatus]	887	340	1139	856	977	484	709	957	543	1332	1092	621	1251	995	490
CrematogasterSubCLCMeta_rep_c1154	ref|XP_018363767.1| PREDICTED: rho GTPase-activating protein 21 isoform X7 [Trachymyrmex cornetzi]	565	1776	1921	1687	1541	2485	1985	1392	2688	895	1718	2081	1455	1719	2014
CrematogasterSubCLCMeta_rep_c1155	ref|XP_011863209.1| PREDICTED: protein retinal degeneration B isoform X5 [Vollenhovia emeryi]	307	433	504	436	416	2314	562	221	520	375	433	307	307	445	376
CrematogasterSubCLCMeta_rep_c1156	ref|XP_011883318.1| PREDICTED: DNA excision repair protein ERCC-6-like [Vollenhovia emeryi]	233	165	340	251	309	288	402	188	276	248	448	277	309	245	310
CrematogasterSubCLCMeta_rep_c1157	ref|XP_011869838.1| PREDICTED: uncharacterized protein LOC105563123 [Vollenhovia emeryi]	87	277	445	220	418	2773	331	311	543	217	120	165	195	414	351
CrematogasterSubCLCMeta_rep_c1158	ref|XP_011869838.1| PREDICTED: uncharacterized protein LOC105563123 [Vollenhovia emeryi]	1296	946	1500	1189	1204	1624	1277	1001	1537	1072	1607	1665	1291	1761	1300
CrematogasterSubCLCMeta_rep_c1159	ref|XP_018299833.1| PREDICTED: dachshund homolog 1 isoform X4 [Trachymyrmex zeteki]	28	72	94	65	133	114	123	3	126	2	95	85	33	59	165
CrematogasterSubCLCMeta_rep_c1160	ref|XP_018360196.1| PREDICTED: neurexin-1 isoform X4 [Trachymyrmex cornetzi]	429	694	356	308	486	691	920	337	1007	314	799	772	396	578	794
CrematogasterSubCLCMeta_rep_c1161	ref|XP_011067164.1| PREDICTED: titin-like [Acromyrmex echinatior]	17283	13068	14555	19493	15422	6526	13169	14589	15883	29958	6770	20219	16065	19626	13818
CrematogasterSubCLCMeta_rep_c1162	ref|XP_018405892.1| PREDICTED: leupaxin isoform X6 [Cyphomyrmex costatus]	1081	628	804	755	1250	653	406	2158	1285	1332	1011	483	2258	550	418
CrematogasterSubCLCMeta_rep_c1163	ref|XP_011703202.1| PREDICTED: citron Rho-interacting kinase-like [Wasmannia auropunctata]	224	71	90	125	90	179	69	106	66	76	36	110	353	121	138
CrematogasterSubCLCMeta_rep_c1164	ref|XP_011639112.1| PREDICTED: homeotic protein antennapedia, partial [Pogonomyrmex barbatus]	266	914	525	402	777	853	899	465	1187	261	1294	802	472	321	925
CrematogasterSubCLCMeta_rep_c1165	ref|XP_011872284.1| PREDICTED: kinesin-like protein KIF2A isoform X5 [Vollenhovia emeryi]	35	96	57	37	59	96	78	23	85	34	37	16	31	81	58
CrematogasterSubCLCMeta_rep_c1166	#N/A	0	245	67	72	164	233	62	0	121	84	78	148	29	84	260
CrematogasterSubCLCMeta_c1167	ref|XP_018348043.1| PREDICTED: chondroitin sulfate proteoglycan 4 isoform X1 [Trachymyrmex septentrionalis]	87	273	111	40	307	403	264	68	356	43	355	401	178	102	377
CrematogasterSubCLCMeta_rep_c1168	ref|XP_011861438.1| PREDICTED: titin-like [Vollenhovia emeryi]	1351	1274	1700	1458	945	3323	1439	1201	1340	1632	998	817	2228	3602	2811
CrematogasterSubCLCMeta_rep_c1169	ref|XP_011156824.1| PREDICTED: uncharacterized protein LOC105193868 isoform X1 [Solenopsis invicta]	1425	1398	2846	1458	1468	2201	1131	1630	1595	1329	1308	1810	1735	1766	2011
CrematogasterSubCLCMeta_rep_c1170	ref|XP_011865012.1| PREDICTED: endophilin-A isoform X4 [Vollenhovia emeryi]	470	1522	1302	329	1486	1209	1494	730	1730	196	1967	2084	1530	473	1277
CrematogasterSubCLCMeta_rep_c1171	ref|XP_011699593.1| PREDICTED: DEP domain-containing protein 5 isoform X8 [Wasmannia auropunctata]	477	428	583	868	867	417	1081	819	1185	774	1118	434	1371	272	449
CrematogasterSubCLCMeta_rep_c1172	ref|XP_018394078.1| PREDICTED: ribose-phosphate pyrophosphokinase 1 isoform X2 [Cyphomyrmex costatus]	8677	5865	1933	3201	2821	3249	2270	11148	1870	2608	6670	3331	3854	2571	2285
CrematogasterSubCLCMeta_rep_c1173	ref|XP_012223052.1| PREDICTED: molybdenum cofactor sulfurase 1 [Linepithema humile]	194	407	412	206	323	679	288	245	235	345	478	450	355	362	379
CrematogasterSubCLCMeta_rep_c1174	ref|XP_011879347.1| PREDICTED: 5-aminolevulinate synthase, erythroid-specific, mitochondrial-like isoform X1 [Vollenhovia emeryi]	522	1569	4390	580	163	881	363	425	296	327	127	4233	178	4106	3710
CrematogasterSubCLCMeta_rep_c1175	ref|XP_018376990.1| PREDICTED: dystrophin, isoforms A/C/F/G/H-like isoform X5 [Trachymyrmex cornetzi]	354	634	709	284	492	1674	467	302	332	408	217	570	643	1206	735
CrematogasterSubCLCMeta_rep_c1176	ref|XP_011172499.1| PREDICTED: uncharacterized protein LOC105204916 isoform X2 [Solenopsis invicta]	28	31	24	24	13	192	16	12	18	0	75	3	40	31	21
CrematogasterSubCLCMeta_rep_c1177	ref|XP_018349875.1| PREDICTED: protein bric-a-brac 1-like isoform X3 [Trachymyrmex septentrionalis]	630	835	947	809	801	1297	618	645	618	637	1718	843	1245	818	1122
CrematogasterSubCLCMeta_rep_c1178	ref|XP_018361286.1| PREDICTED: uncharacterized protein LOC108760014 [Trachymyrmex cornetzi]	6791	2927	4768	6001	6198	3543	5886	5708	6232	6001	8096	4246	5954	2476	3548
CrematogasterSubCLCMeta_rep_c1179	ref|XP_011866655.1| PREDICTED: uncharacterized protein LOC105561357 isoform X4 [Vollenhovia emeryi]	2311	2783	2979	3601	2767	3643	2568	2425	4675	2061	4283	3580	2070	4178	4337
CrematogasterSubCLCMeta_rep_c1180	ref|XP_018407075.1| PREDICTED: tensin-3 isoform X3 [Cyphomyrmex costatus]	3405	3476	6297	6571	4931	12051	3980	3623	5227	5748	6140	4804	5309	3975	5327
CrematogasterSubCLCMeta_rep_c1181	ref|XP_011864472.1| PREDICTED: uncharacterized protein LOC105560198 [Vollenhovia emeryi]	133	32	90	117	118	12	42	100	123	136	39	55	112	69	60
CrematogasterSubCLCMeta_rep_c1182	ref|XP_011175641.1| PREDICTED: serine--tRNA ligase, mitochondrial [Solenopsis invicta]	326	169	291	404	259	215	149	330	327	113	645	121	426	172	133
CrematogasterSubCLCMeta_rep_c1183	ref|XP_012522739.1| PREDICTED: OTU domain-containing protein 7B-like [Monomorium pharaonis]	561	1220	1210	528	454	927	356	441	517	1044	573	976	778	1870	1082
CrematogasterSubCLCMeta_rep_c1184	ref|XP_011874899.1| PREDICTED: MAGUK p55 subfamily member 5-A isoform X3 [Vollenhovia emeryi]	245	449	864	426	370	797	902	119	640	478	252	775	749	654	732
CrematogasterSubCLCMeta_rep_c1185	ref|XP_011865108.1| PREDICTED: uncharacterized protein LOC105560533 [Vollenhovia emeryi]	167	46	114	68	102	182	108	93	248	291	1456	90	569	352	95
CrematogasterSubCLCMeta_rep_c1186	ref|XP_012525606.1| PREDICTED: RNA binding protein fox-1 homolog 2 isoform X4 [Monomorium pharaonis]	130	580	279	255	191	1054	271	179	253	204	213	409	147	691	1102
CrematogasterSubCLCMeta_rep_c1187	ref|XP_018398805.1| PREDICTED: phosphatidylinositol 3-kinase regulatory subunit alpha [Cyphomyrmex costatus]	912	2191	881	357	910	2194	930	371	648	326	742	2760	757	1047	3381
CrematogasterSubCLCMeta_rep_c1188	ref|XP_018375164.1| PREDICTED: uncharacterized protein LOC108768946 isoform X1 [Trachymyrmex cornetzi]	527	586	468	516	712	488	781	458	550	458	609	667	483	505	703
CrematogasterSubCLCMeta_rep_c1189	ref|XP_011171604.1| PREDICTED: putative nuclease HARBI1 isoform X1 [Solenopsis invicta]	189	218	191	158	120	204	142	94	144	20	192	310	97	196	307
CrematogasterSubCLCMeta_rep_c1190	ref|XP_011634748.1| PREDICTED: ATP-binding cassette sub-family G member 1 [Pogonomyrmex barbatus]	2014	1621	5260	2075	1719	4444	1066	1103	1830	1135	3179	2347	2502	1828	1963
CrematogasterSubCLCMeta_rep_c1191	ref|XP_014483888.1| PREDICTED: RNA-binding protein lark isoform X7 [Dinoponera quadriceps]	4514	3888	4641	3383	3874	4612	4013	3557	5931	2094	6469	3478	4299	4148	4229
CrematogasterSubCLCMeta_rep_c1192	ref|XP_002633527.1| Hypothetical protein CBG05392 [Caenorhabditis briggsae]	47	215	32	41	127	196	252	39	201	26	292	167	147	30	194
CrematogasterSubCLCMeta_rep_c1193	ref|XP_011156185.1| PREDICTED: protein zyg-11 homolog B-like isoform X1 [Solenopsis invicta]	1433	1202	1308	1485	1491	1445	1259	1148	1487	1228	2096	1232	1704	979	1159
CrematogasterSubCLCMeta_rep_c1194	ref|XP_011700024.1| PREDICTED: E3 ubiquitin-protein ligase HECW2 [Wasmannia auropunctata]	501	419	525	580	430	697	486	549	492	298	1011	397	608	548	607
CrematogasterSubCLCMeta_rep_c1195	ref|XP_011883375.1| PREDICTED: protein tramtrack, beta isoform isoform X4 [Vollenhovia emeryi]	490	1044	1037	387	425	1220	411	475	546	521	310	791	409	923	1066
CrematogasterSubCLCMeta_rep_c1196	ref|XP_011869661.1| PREDICTED: proto-oncogene tyrosine-protein kinase ROS isoform X3 [Vollenhovia emeryi]	542	1232	1491	532	439	1940	723	350	269	586	210	1461	400	1954	1726
CrematogasterSubCLCMeta_rep_c1197	ref|XP_011694925.1| PREDICTED: heparan sulfate glucosamine 3-O-sulfotransferase 5 [Wasmannia auropunctata]	50	350	44	70	256	399	376	27	264	81	346	134	86	30	378
CrematogasterSubCLCMeta_rep_c1198	ref|XP_011689122.1| PREDICTED: TATA element modulatory factor [Wasmannia auropunctata]	1467	829	1304	859	1261	1288	1411	1450	1210	1111	3288	1034	1530	1125	931
CrematogasterSubCLCMeta_rep_c1199	ref|XP_011879089.1| PREDICTED: uncharacterized protein LOC105568228 [Vollenhovia emeryi]	115488	4910	22886	4447	39399	27	43600	2373	25267	1182	14044	4644	8378	188	5967
CrematogasterSubCLCMeta_rep_c1200	ref|XP_011162466.1| PREDICTED: unconventional myosin-If-like [Solenopsis invicta]	570	293	257	271	265	201	124	210	372	105	1534	252	1963	416	162
CrematogasterSubCLCMeta_rep_c1201	ref|XP_011870124.1| PREDICTED: aminopeptidase N [Vollenhovia emeryi]	49	143	53	152	12	707	74	2	11	46	126	24	307	460	73
CrematogasterSubCLCMeta_rep_c1202	ref|XP_018317608.1| PREDICTED: neuropathy target esterase sws isoform X1 [Trachymyrmex zeteki]	41	366	165	323	40	782	88	59	163	78	257	94	77	340	87
CrematogasterSubCLCMeta_rep_c1203	ref|XP_018043645.1| PREDICTED: neuropathy target esterase sws [Atta colombica]	1098	520	1331	916	881	2174	1339	634	840	1841	5379	1101	1632	666	1513
CrematogasterSubCLCMeta_rep_c1204	ref|XP_011172617.1| PREDICTED: nuclear pore complex protein Nup205 [Solenopsis invicta]	159	335	193	366	531	323	188	187	272	299	1072	726	864	553	1103
CrematogasterSubCLCMeta_rep_c1205	ref|XP_011695563.1| PREDICTED: SET and MYND domain-containing protein 4 [Wasmannia auropunctata]	0	0	0	0	0	0	6	4	0	28	0	0	5	0	0
CrematogasterSubCLCMeta_rep_c1206	ref|XP_011695563.1| PREDICTED: SET and MYND domain-containing protein 4 [Wasmannia auropunctata]	959	612	1017	716	638	810	724	691	799	688	397	770	1027	765	626
CrematogasterSubCLCMeta_rep_c1207	#N/A	205	21	14	96	65	11	141	95	232	123	202	46	135	172	6
CrematogasterSubCLCMeta_rep_c1208	ref|XP_018300229.1| PREDICTED: protein O-mannosyltransferase 1 [Trachymyrmex zeteki]	546	146	227	389	612	221	642	292	623	295	772	130	463	284	264
CrematogasterSubCLCMeta_rep_c1209	ref|XP_011696354.1| PREDICTED: protein GDAP2 homolog isoform X1 [Wasmannia auropunctata]	1867	262	89	108	200	414	51	179	1661	57	2358	86	1533	177	184
CrematogasterSubCLCMeta_rep_c1210	ref|XP_011873314.1| PREDICTED: enolase isoform X1 [Vollenhovia emeryi]	7145	6388	8626	5585	5910	5370	5133	8001	7619	3543	4753	6359	6767	6439	5542
CrematogasterSubCLCMeta_rep_c1211	ref|XP_011876218.1| PREDICTED: trehalase isoform X2 [Vollenhovia emeryi]	1260	923	1221	1417	1438	1261	507	990	969	795	2228	930	794	2575	1074
CrematogasterSubCLCMeta_rep_c1212	ref|XP_011560756.1| PREDICTED: uncharacterized protein LOC105391048 [Plutella xylostella]	790	645	1761	430	162	41	227	792	203	430	1042	599	158	866	1656
CrematogasterSubCLCMeta_rep_c1213	ref|XP_018362690.1| PREDICTED: poly(ADP-ribose) glycohydrolase ARH3-like isoform X1 [Trachymyrmex cornetzi]	113	184	153	295	241	192	321	168	309	300	341	321	172	191	225
CrematogasterSubCLCMeta_rep_c1214	ref|XP_018402977.1| PREDICTED: mitochondrial uncoupling protein 2-like [Cyphomyrmex costatus]	271	797	1183	803	927	1601	932	339	1067	385	2515	1978	804	3697	1331
CrematogasterSubCLCMeta_rep_c1215	ref|XP_011879050.1| PREDICTED: serine/threonine-protein phosphatase 6 regulatory ankyrin repeat subunit A-like [Vollenhovia emeryi]	520	315	638	396	414	317	356	199	472	418	162	205	440	425	286
CrematogasterSubCLCMeta_rep_c1216	ref|XP_011881670.1| PREDICTED: RAB6A-GEF complex partner protein 2 [Vollenhovia emeryi]	168	146	101	153	138	180	336	88	66	257	116	178	122	235	154
CrematogasterSubCLCMeta_rep_c1217	ref|XP_011268554.1| PREDICTED: muscarinic acetylcholine receptor DM1 isoform X1 [Camponotus floridanus]	7	405	0	0	402	388	505	7	578	2	609	223	18	69	427
CrematogasterSubCLCMeta_rep_c1218	ref|XP_011689550.1| PREDICTED: ran-binding protein 9 isoform X2 [Wasmannia auropunctata]	3142	2759	2822	3400	3767	4241	3307	2986	3714	3886	4131	3782	3250	3962	4320
CrematogasterSubCLCMeta_rep_c1219	ref|XP_011872712.1| PREDICTED: afadin isoform X7 [Vollenhovia emeryi]	1292	817	1310	1518	1985	1641	1729	1293	2139	1206	2552	1227	3077	620	1239
CrematogasterSubCLCMeta_rep_c1220	ref|XP_011876820.1| PREDICTED: probable chitinase 3 [Vollenhovia emeryi]	44	24	31	56	29	381	32	17	30	86	30	34	49	60	61
CrematogasterSubCLCMeta_rep_c1221	ref|XP_011700779.1| PREDICTED: max dimerization protein 1-like [Wasmannia auropunctata]	548	306	167	571	578	804	619	788	765	410	684	139	734	431	301
CrematogasterSubCLCMeta_rep_c1222	ref|XP_011050821.1| PREDICTED: protein hu-li tai shao isoform X4 [Acromyrmex echinatior]	1584	1087	1850	1173	1579	3304	1803	1562	1674	1291	1818	1603	2440	1793	1475
CrematogasterSubCLCMeta_rep_c1223	ref|XP_018315668.1| PREDICTED: RNA-binding protein fusilli [Trachymyrmex zeteki]	461	566	824	282	350	287	206	191	185	238	74	273	164	327	663
CrematogasterSubCLCMeta_rep_c1224	ref|XP_012527113.1| PREDICTED: zinc finger and BTB domain-containing protein 6 isoform X5 [Monomorium pharaonis]	32	493	183	45	177	643	241	54	288	35	432	690	114	64	1067
CrematogasterSubCLCMeta_rep_c1225	ref|XP_018397658.1| PREDICTED: troponin I-like isoform X12 [Cyphomyrmex costatus]	5470	4304	5392	4648	2753	2582	5966	6032	6765	7999	1131	5757	5025	10412	3511
CrematogasterSubCLCMeta_rep_c1226	ref|XP_012526497.1| PREDICTED: histone H4 transcription factor [Monomorium pharaonis]	561	709	756	965	1057	1723	995	533	1408	220	1066	753	1302	716	1123
CrematogasterSubCLCMeta_rep_c1227	#N/A	6	76	28	40	204	90	302	15	262	0	290	153	18	0	81
CrematogasterSubCLCMeta_rep_c1228	ref|XP_018307270.1| PREDICTED: uncharacterized protein LOC108725016 [Trachymyrmex zeteki]	0	269	29	62	192	498	92	0	124	16	123	142	9	43	241
CrematogasterSubCLCMeta_rep_c1229	ref|XP_011050423.1| PREDICTED: uncharacterized protein LOC105143670 [Acromyrmex echinatior]	69	254	78	30	282	48	481	39	406	63	308	246	40	82	223
CrematogasterSubCLCMeta_rep_c1230	ref|XP_015595137.1| PREDICTED: uncharacterized protein LOC107267672 [Cephus cinctus]	1106	1160	1133	1938	947	149	736	816	846	1115	370	1154	745	1332	1972
CrematogasterSubCLCMeta_rep_c1231	ref|XP_011874175.1| PREDICTED: mini-chromosome maintenance complex-binding protein isoform X1 [Vollenhovia emeryi]	223	81	253	183	227	211	251	212	540	154	1068	190	845	221	278
CrematogasterSubCLCMeta_rep_c1232	ref|XP_012542845.1| PREDICTED: laminin subunit beta-1 isoform X1 [Monomorium pharaonis]	632	410	779	551	993	588	1544	1104	1253	1203	708	661	1264	811	1310
CrematogasterSubCLCMeta_rep_c1233	ref|XP_011642299.1| PREDICTED: putative ATP-dependent RNA helicase DHX57 isoform X1 [Pogonomyrmex barbatus]	73	115	252	105	78	54	157	88	135	16	214	108	82	108	148
CrematogasterSubCLCMeta_rep_c1234	ref|XP_011876047.1| PREDICTED: poly(rC)-binding protein 3 isoform X3 [Vollenhovia emeryi]	293	1105	2467	319	372	3006	439	373	353	50	335	2065	631	954	1899
CrematogasterSubCLCMeta_rep_c1235	ref|XP_011166521.1| PREDICTED: nuclear factor 1 X-type isoform X2 [Solenopsis invicta]	924	877	1611	1066	792	1266	838	692	800	1432	757	1141	1058	2039	884
CrematogasterSubCLCMeta_rep_c1236	ref|XP_011863796.1| PREDICTED: uncharacterized protein LOC105559808 [Vollenhovia emeryi]	19	37	0	12	18	5	21	14	5	0	56	20	11	5	32
CrematogasterSubCLCMeta_rep_c1237	ref|XP_014469758.1| PREDICTED: uncharacterized protein LOC106741871 [Dinoponera quadriceps]	47	12	18	27	57	8	40	32	39	41	61	12	43	8	23
CrematogasterSubCLCMeta_rep_c1238	ref|XP_012339455.1| PREDICTED: serine-arginine protein 55 isoform X30 [Apis florea]	6570	7080	9461	8340	9223	9038	8268	5844	7947	6602	15407	7261	6779	5665	7774
CrematogasterSubCLCMeta_rep_c1239	ref|XP_018309714.1| PREDICTED: histone-arginine methyltransferase CARMER isoform X2 [Trachymyrmex zeteki]	103	113	144	65	212	423	360	81	188	118	364	235	192	130	267
CrematogasterSubCLCMeta_rep_c1240	ref|XP_018370638.1| PREDICTED: AMP deaminase 2 isoform X7 [Trachymyrmex cornetzi]	7446	3820	8096	3103	2879	4692	6110	4311	3258	6139	4539	6224	5311	6529	6632
CrematogasterSubCLCMeta_rep_c1241	ref|XP_018312362.1| PREDICTED: MLX-interacting protein isoform X2 [Trachymyrmex zeteki]	752	317	109	637	1055	779	0	1127	198	964	1537	16	2039	169	17
CrematogasterSubCLCMeta_rep_c1242	ref|XP_018375234.1| PREDICTED: dihydropyrimidinase isoform X1 [Trachymyrmex cornetzi]	1143	999	820	694	1035	1373	1241	1211	1217	1199	811	1462	986	1172	1086
CrematogasterSubCLCMeta_rep_c1243	ref|XP_011871204.1| PREDICTED: charged multivesicular body protein 3 [Vollenhovia emeryi]	257	269	434	195	295	306	242	248	310	354	400	412	383	318	330
CrematogasterSubCLCMeta_rep_c1244	ref|XP_011881109.1| PREDICTED: Niemann-Pick C1 protein isoform X2 [Vollenhovia emeryi]	1809	1436	1956	1738	1418	1668	1414	1209	1610	1371	1780	2694	3366	1881	2087
CrematogasterSubCLCMeta_rep_c1245	ref|XP_018402210.1| PREDICTED: procollagen-lysine,2-oxoglutarate 5-dioxygenase 3 isoform X1 [Cyphomyrmex costatus]	804	525	426	235	646	1011	873	362	1271	0	361	422	494	90	309
CrematogasterSubCLCMeta_rep_c1246	ref|XP_018044181.1| PREDICTED: uncharacterized protein LOC108684403 isoform X1 [Atta colombica]	2057	848	1035	1281	1521	2232	674	1299	2086	756	981	796	1959	304	1129
CrematogasterSubCLCMeta_rep_c1247	ref|XP_011864494.1| PREDICTED: basement membrane-specific heparan sulfate proteoglycan core protein isoform X13 [Vollenhovia emeryi]	218	242	248	149	128	190	94	218	329	13	116	65	453	162	129
CrematogasterSubCLCMeta_rep_c1248	ref|XP_018401651.1| PREDICTED: lipoma HMGIC fusion partner-like [Cyphomyrmex costatus]	68	251	167	136	68	232	115	84	218	132	179	125	212	147	214
CrematogasterSubCLCMeta_rep_c1249	ref|XP_011168754.1| PREDICTED: fatty-acid amide hydrolase 2-B-like [Solenopsis invicta]	4455	2618	4170	4250	3894	4283	3196	3787	3633	4720	2872	3577	4345	3797	3657
CrematogasterSubCLCMeta_rep_c1250	ref|XP_002056129.2| uncharacterized protein Dvir_GJ10772 [Drosophila virilis]	158	111	57	57	89	102	200	47	113	52	80	108	4	9	85
CrematogasterSubCLCMeta_rep_c1251	ref|XP_011174872.1| PREDICTED: uncharacterized protein LOC105207131, partial [Solenopsis invicta]	296	204	286	0	758	63	27	4	7	2	0	203	10	49	20
CrematogasterSubCLCMeta_rep_c1252	ref|XP_011878395.1| PREDICTED: glycerate kinase-like [Vollenhovia emeryi]	2477	688	1648	1342	3202	3114	1751	1712	2362	1228	579	1998	1934	960	2233
CrematogasterSubCLCMeta_rep_c1253	ref|XP_018394597.1| PREDICTED: cytosolic Fe-S cluster assembly factor NUBP1 homolog [Cyphomyrmex costatus]	372	168	155	263	171	272	356	309	197	303	299	265	183	281	243
CrematogasterSubCLCMeta_rep_c1254	ref|XP_011065253.1| PREDICTED: putative uncharacterized protein FLJ37770 [Acromyrmex echinatior]	169	52	37	68	86	11	93	144	91	106	16	107	139	88	43
CrematogasterSubCLCMeta_rep_c1255	ref|XP_018371160.1| PREDICTED: calcium-transporting ATPase sarcoplasmic/endoplasmic reticulum type isoform X3 [Trachymyrmex cornetzi]	3333	2550	3019	3474	495	3133	1364	4612	2392	20428	1563	62	3683	184	1071
CrematogasterSubCLCMeta_rep_c1256	ref|XP_011859263.1| PREDICTED: uncharacterized protein LOC105556764 isoform X1 [Vollenhovia emeryi]	387	267	428	378	442	514	210	205	446	170	707	272	207	129	461
CrematogasterSubCLCMeta_rep_c1257	ref|XP_011647968.1| PREDICTED: LOW QUALITY PROTEIN: abnormal spindle-like microcephaly-associated protein homolog [Pogonomyrmex barbatus]	718	1072	1835	1180	1078	1433	1105	900	1125	1319	1358	1399	1138	1538	1556
CrematogasterSubCLCMeta_rep_c1258	ref|XP_011702615.1| PREDICTED: disco-interacting protein 2 isoform X6 [Wasmannia auropunctata]	2758	2909	4035	2647	3251	2321	3038	2589	2886	1989	3164	3007	3874	3336	3718
CrematogasterSubCLCMeta_rep_c1259	ref|XP_018317684.1| PREDICTED: cell division cycle protein 23 homolog [Trachymyrmex zeteki]	2121	1272	2832	2802	2732	896	2408	2563	3468	2228	961	2895	1927	2357	2624
CrematogasterSubCLCMeta_rep_c1260	ref|XP_011869151.1| PREDICTED: eukaryotic translation initiation factor 5B-like isoform X1 [Vollenhovia emeryi]	169	176	182	88	108	167	88	114	247	595	198	223	181	289	171
CrematogasterSubCLCMeta_rep_c1261	ref|XP_018308276.1| PREDICTED: small subunit processome component 20 homolog [Trachymyrmex zeteki]	472	609	837	753	461	794	470	375	553	393	1718	490	711	394	484
CrematogasterSubCLCMeta_rep_c1262	ref|XP_020718727.1| uncharacterized protein LOC100645321 isoform X2 [Bombus terrestris]	11	13	6	13	20	15	34	3	22	44	25	25	21	12	12
CrematogasterSubCLCMeta_rep_c1263	ref|XP_018313841.1| PREDICTED: flocculation protein FLO11 isoform X2 [Trachymyrmex zeteki]	1303	2603	4705	2012	842	10645	1177	892	1223	3813	2430	4003	987	7754	3588
CrematogasterSubCLCMeta_rep_c1264	ref|XP_012349201.1| PREDICTED: stress-activated protein kinase JNK isoform X2 [Apis florea]	427	580	348	738	773	1026	632	579	728	742	692	300	677	701	812
CrematogasterSubCLCMeta_rep_c1265	#N/A	44	293	30	14	282	333	361	36	328	104	238	308	37	29	397
CrematogasterSubCLCMeta_rep_c1266	ref|XP_011642109.1| PREDICTED: solute carrier family 25 member 38-like isoform X1 [Pogonomyrmex barbatus]	157	164	0	161	327	61	205	192	136	190	859	85	103	37	204
CrematogasterSubCLCMeta_rep_c1267	ref|XP_011689098.1| PREDICTED: venom carboxylesterase-6-like [Wasmannia auropunctata]	209	316	466	906	127	442	125	177	147	188	23	414	189	1664	498
CrematogasterSubCLCMeta_rep_c1268	ref|XP_011873157.1| PREDICTED: extracellular sulfatase SULF-1 homolog isoform X3 [Vollenhovia emeryi]	74	274	305	185	289	338	366	103	361	101	340	165	481	214	259
CrematogasterSubCLCMeta_rep_c1269	ref|XP_018055112.1| PREDICTED: integrator complex subunit 9 [Atta colombica]	147	138	206	158	355	497	296	187	182	118	1540	90	202	169	150
CrematogasterSubCLCMeta_rep_c1270	ref|XP_011053821.1| PREDICTED: epsin-2 isoform X2 [Acromyrmex echinatior]	331	1302	1097	642	39	2474	224	185	191	3	282	1586	427	1907	1686
CrematogasterSubCLCMeta_rep_c1271	ref|XP_011867633.1| PREDICTED: ankyrin repeat and SAM domain-containing protein 1A-like isoform X2 [Vollenhovia emeryi]	166	285	231	233	311	309	616	210	603	159	586	392	225	130	413
CrematogasterSubCLCMeta_rep_c1272	ref|XP_011859876.1| PREDICTED: uncharacterized protein LOC105557288 [Vollenhovia emeryi]	824	954	1962	1296	899	201	1136	520	895	1217	880	2039	734	3005	2663
CrematogasterSubCLCMeta_rep_c1273	ref|XP_012540852.1| PREDICTED: transcription elongation factor SPT6 isoform X2 [Monomorium pharaonis]	1003	1291	1882	1152	1286	1907	1437	922	1398	1487	2633	1776	1225	1613	1814
CrematogasterSubCLCMeta_rep_c1274	ref|XP_011867258.1| PREDICTED: actin cytoskeleton-regulatory complex protein PAN1 isoform X1 [Vollenhovia emeryi]	4629	4957	4349	5759	5483	6036	4750	4672	5472	4815	6155	4929	5822	4423	5744
CrematogasterSubCLCMeta_rep_c1275	ref|XP_011874777.1| PREDICTED: protein-methionine sulfoxide oxidase mical3b isoform X2 [Vollenhovia emeryi]	3962	3501	5261	3725	4620	5117	4360	2931	4414	3253	3564	5598	4199	4084	5224
CrematogasterSubCLCMeta_rep_c1276	ref|XP_011872778.1| PREDICTED: kinectin isoform X4 [Vollenhovia emeryi]	836	836	426	1210	454	298	1407	1182	810	8	786	420	771	901	742
CrematogasterSubCLCMeta_rep_c1277	ref|XP_011693470.1| PREDICTED: uncharacterized protein LOC105453325 [Wasmannia auropunctata]	103	203	95	110	62	202	62	65	96	174	158	90	82	132	430
CrematogasterSubCLCMeta_rep_c1278	ref|XP_018360772.1| PREDICTED: eukaryotic initiation factor 4A-I [Trachymyrmex cornetzi]	1164	337	557	973	665	599	2806	1420	2185	1769	5999	761	2279	380	557
CrematogasterSubCLCMeta_rep_c1279	ref|XP_011868821.1| PREDICTED: uncharacterized protein LOC105562524 isoform X1 [Vollenhovia emeryi]	256	323	274	631	834	1255	528	189	226	371	969	330	667	451	509
CrematogasterSubCLCMeta_rep_c1280	ref|XP_011866130.1| PREDICTED: probable G-protein coupled receptor Mth-like 3 isoform X1 [Vollenhovia emeryi]	2869	1799	3121	2164	2222	5871	8569	3751	3918	1925	1239	4377	5519	2194	3198
CrematogasterSubCLCMeta_rep_c1281	ref|XP_011635321.1| PREDICTED: uncharacterized protein LOC105425975 [Pogonomyrmex barbatus]	681	919	1127	448	649	971	708	730	611	846	629	1119	793	702	1083
CrematogasterSubCLCMeta_rep_c1282	ref|XP_011172072.1| PREDICTED: E3 ubiquitin-protein ligase UBR2 [Solenopsis invicta]	4571	3876	4805	4505	4520	3015	3491	2077	4861	3490	3426	4453	2144	5364	5670
CrematogasterSubCLCMeta_rep_c1283	ref|XP_012235887.1| PREDICTED: uncharacterized protein LOC105680043 [Linepithema humile]	15	28	25	31	38	72	57	29	66	2	48	55	45	42	48
CrematogasterSubCLCMeta_rep_c1284	ref|XP_018373532.1| PREDICTED: protein pellino isoform X2 [Trachymyrmex cornetzi]	3622	1812	3538	2978	3772	2849	3060	3861	3299	5015	3065	2673	3848	1678	3201
CrematogasterSubCLCMeta_rep_c1285	ref|XP_018402657.1| PREDICTED: myosin-I heavy chain [Cyphomyrmex costatus]	63	57	43	113	74	316	115	70	174	34	301	99	150	105	139
CrematogasterSubCLCMeta_rep_c1286	ref|XP_018351793.1| PREDICTED: myosin-I heavy chain [Trachymyrmex septentrionalis]	135	119	177	142	188	271	265	133	264	294	579	299	240	488	243
CrematogasterSubCLCMeta_rep_c1287	ref|XP_011880301.1| PREDICTED: rab11 family-interacting protein 2 [Vollenhovia emeryi]	742	1001	2745	845	1082	1861	1881	823	957	1354	1294	2485	1367	2018	1469
CrematogasterSubCLCMeta_rep_c1288	#N/A	2	239	13	4	206	188	363	3	356	0	244	253	12	12	258
CrematogasterSubCLCMeta_rep_c1289	ref|XP_018308715.1| PREDICTED: transforming acidic coiled-coil-containing protein 3 isoform X3 [Trachymyrmex zeteki]	1561	257	2327	1325	1979	1192	1379	1097	1891	985	1602	334	1853	387	378
CrematogasterSubCLCMeta_rep_c1290	ref|XP_012526170.1| PREDICTED: alpha-1,6-mannosyl-glycoprotein 2-beta-N-acetylglucosaminyltransferase isoform X2 [Monomorium pharaonis]	1797	1144	1263	1592	924	2175	1156	1303	1668	892	893	1321	1915	1538	1205
CrematogasterSubCLCMeta_rep_c1291	ref|XP_018336988.1| PREDICTED: signal recognition particle subunit SRP68 [Trachymyrmex septentrionalis]	4372	2053	2127	4843	3148	3968	3062	4086	3170	3270	4313	2450	2947	2191	1770
CrematogasterSubCLCMeta_rep_c1292	ref|XP_011261348.1| PREDICTED: THO complex subunit 1 isoform X2 [Camponotus floridanus]	97	186	123	65	106	367	120	156	210	35	134	148	277	129	239
CrematogasterSubCLCMeta_rep_c1293	ref|XP_011869455.1| PREDICTED: uncharacterized protein LOC105562901 [Vollenhovia emeryi]	1227	641	2026	1258	1408	5724	1579	1590	1594	842	1162	769	1685	1177	1268
CrematogasterSubCLCMeta_rep_c1294	ref|XP_011332060.1| PREDICTED: actin-related protein 2/3 complex subunit 4 [Ooceraea biroi]	599	455	694	477	532	410	342	407	420	378	565	542	574	301	561
CrematogasterSubCLCMeta_rep_c1295	ref|XP_011689146.1| PREDICTED: ragulator complex protein LAMTOR2 [Wasmannia auropunctata]	76	69	69	86	5	208	123	0	133	0	61	61	76	21	67
CrematogasterSubCLCMeta_rep_c1296	ref|XP_011176376.1| PREDICTED: mitochondrial Rho GTPase isoform X2 [Solenopsis invicta]	1590	142	182	562	2886	211	1526	2393	688	2369	1651	247	1903	164	271
CrematogasterSubCLCMeta_rep_c1297	ref|XP_011871465.1| PREDICTED: rhomboid-related protein 3 isoform X1 [Vollenhovia emeryi]	301	616	885	162	98	617	224	225	84	87	460	898	545	1356	697
CrematogasterSubCLCMeta_rep_c1298	ref|XP_014486551.1| PREDICTED: protein kinase C and casein kinase substrate in neurons protein 2 isoform X4 [Dinoponera quadriceps]	168	155	440	92	326	707	320	155	195	114	432	290	251	310	429
CrematogasterSubCLCMeta_rep_c1299	ref|XP_018392125.1| PREDICTED: 2-oxoglutarate dehydrogenase, mitochondrial isoform X2 [Cyphomyrmex costatus]	1548	1210	806	1035	1466	2483	792	1152	1461	2277	1215	794	1843	867	468
CrematogasterSubCLCMeta_rep_c1300	ref|XP_011172922.1| PREDICTED: alpha-catulin-like [Solenopsis invicta]	64	525	109	21	512	522	592	61	699	67	685	473	119	65	488
CrematogasterSubCLCMeta_rep_c1301	ref|XP_011865784.1| PREDICTED: uncharacterized protein LOC105560891 isoform X2 [Vollenhovia emeryi]	696	1049	1652	661	481	483	456	914	858	2024	490	1861	1202	1326	1095
CrematogasterSubCLCMeta_c1302	ref|XP_011638676.1| PREDICTED: signal recognition particle 54 kDa protein [Pogonomyrmex barbatus]	2205	1830	2160	1592	1918	1966	1819	1854	1712	1701	2398	2313	1918	1536	2429
CrematogasterSubCLCMeta_rep_c1303	ref|XP_011693296.1| PREDICTED: semaphorin-5B [Wasmannia auropunctata]	331	145	208	499	184	274	1095	655	206	265	3	297	36	285	368
CrematogasterSubCLCMeta_rep_c1304	ref|XP_011645950.1| PREDICTED: two pore calcium channel protein 1-like [Pogonomyrmex barbatus]	207	204	103	196	112	1663	256	171	114	312	176	142	187	25	10
CrematogasterSubCLCMeta_rep_c1305	ref|XP_011645950.1| PREDICTED: two pore calcium channel protein 1-like [Pogonomyrmex barbatus]	580	447	564	301	792	542	861	512	681	656	338	495	521	255	416
CrematogasterSubCLCMeta_rep_c1306	ref|XP_011331837.1| PREDICTED: RNA-binding protein 42 [Ooceraea biroi]	714	1327	1934	395	922	648	2050	457	453	333	1147	859	507	758	925
CrematogasterSubCLCMeta_rep_c1307	ref|XP_011173334.1| PREDICTED: uncharacterized protein LOC105205624 [Solenopsis invicta]	470	229	244	270	268	171	250	331	257	282	47	263	167	221	263
CrematogasterSubCLCMeta_rep_c1308	ref|XP_012526960.1| PREDICTED: nucleoside diphosphate kinase [Monomorium pharaonis]	1286	2912	3244	1325	866	1387	947	1263	1031	1008	397	4235	1082	2317	2913
CrematogasterSubCLCMeta_rep_c1309	ref|XP_018397081.1| PREDICTED: uncharacterized protein LOC108775269 [Cyphomyrmex costatus]	33	135	84	65	90	7	88	82	84	140	154	134	64	160	192
CrematogasterSubCLCMeta_rep_c1310	ref|XP_018316540.1| PREDICTED: ABC transporter G family member 20-like isoform X1 [Trachymyrmex zeteki]	108	757	1456	525	600	388	682	231	926	498	544	850	261	1074	1358
CrematogasterSubCLCMeta_rep_c1311	ref|XP_011161298.1| PREDICTED: uncharacterized protein LOC105196858 [Solenopsis invicta]	38	86	304	302	170	452	70	101	141	36	174	199	364	272	91
CrematogasterSubCLCMeta_rep_c1312	ref|XP_011879616.1| PREDICTED: voltage-dependent calcium channel type A subunit alpha-1-like isoform X2 [Vollenhovia emeryi]	91	359	40	101	421	364	809	41	602	55	556	255	54	8	389
CrematogasterSubCLCMeta_rep_c1313	ref|XP_011689985.1| PREDICTED: one cut domain family member 3-like [Wasmannia auropunctata]	141	131	284	105	266	129	185	143	430	62	796	106	159	72	120
CrematogasterSubCLCMeta_rep_c1314	ref|XP_012936627.1| PREDICTED: SCO-spondin-like [Aplysia californica]	0	25	0	0	13	91	0	0	0	0	22	26	1	0	11
CrematogasterSubCLCMeta_rep_c1315	ref|XP_011697973.1| PREDICTED: carnitine O-palmitoyltransferase 1, muscle isoform isoform X2 [Wasmannia auropunctata]	7665	2779	2410	5239	4711	12542	4382	4898	3519	6048	5595	3329	3364	4610	4743
CrematogasterSubCLCMeta_rep_c1316	ref|XP_011163882.1| PREDICTED: uncharacterized protein LOC105198746, partial [Solenopsis invicta]	83	64	173	81	99	61	41	57	115	47	150	94	571	176	117
CrematogasterSubCLCMeta_rep_c1317	ref|XP_011871455.1| PREDICTED: ankyrin repeat and BTB/POZ domain-containing protein BTBD11 isoform X4 [Vollenhovia emeryi]	122	102	129	120	140	85	162	175	189	16	206	129	360	94	151
CrematogasterSubCLCMeta_rep_c1318	ref|XP_011876669.1| PREDICTED: uncharacterized protein LOC105566886 [Vollenhovia emeryi]	960	259	630	877	656	1013	600	700	916	1302	481	457	748	424	407
CrematogasterSubCLCMeta_rep_c1319	ref|XP_011875805.1| PREDICTED: uncharacterized protein LOC105566421 isoform X3 [Vollenhovia emeryi]	396	354	389	696	710	430	559	219	874	323	1303	340	1007	573	571
CrematogasterSubCLCMeta_rep_c1320	ref|XP_011872672.1| PREDICTED: probable Ras GTPase-activating protein isoform X7 [Vollenhovia emeryi]	371	107	514	367	835	340	99	356	481	677	2357	0	1056	0	172
CrematogasterSubCLCMeta_rep_c1321	ref|XP_012349257.1| PREDICTED: phosphatase and actin regulator 4-like isoform X5 [Apis florea]	474	1126	907	422	1119	1158	1427	611	2790	285	3232	902	1040	328	1203
CrematogasterSubCLCMeta_rep_c1322	ref|XP_011687343.1| PREDICTED: brefeldin A-inhibited guanine nucleotide-exchange protein 1 [Wasmannia auropunctata]	739	738	1074	526	739	937	911	988	1146	676	558	791	865	842	828
CrematogasterSubCLCMeta_rep_c1323	ref|XP_011879985.1| PREDICTED: AF4/FMR2 family member 4 isoform X3 [Vollenhovia emeryi]	3655	3012	4407	4252	3850	5621	3652	3203	3316	3974	13674	3638	3726	3973	5206
CrematogasterSubCLCMeta_rep_c1324	ref|XP_018046325.1| PREDICTED: uncharacterized protein LOC108685842 isoform X1 [Atta colombica]	132	242	126	276	420	1023	600	178	493	138	408	255	269	73	302
CrematogasterSubCLCMeta_rep_c1325	ref|XP_018315685.1| PREDICTED: mediator of RNA polymerase II transcription subunit 14 isoform X4 [Trachymyrmex zeteki]	404	1167	828	2734	2454	2481	3508	1172	3386	1358	3428	2338	2476	1129	1330
CrematogasterSubCLCMeta_rep_c1326	ref|XP_011867430.1| PREDICTED: teneurin-m isoform X1 [Vollenhovia emeryi]	32	22	110	42	33	895	56	42	112	1	69	28	96	88	75
CrematogasterSubCLCMeta_rep_c1327	ref|XP_011697188.1| PREDICTED: USP6 N-terminal-like protein [Wasmannia auropunctata]	535	628	567	591	760	783	853	414	590	522	960	530	955	284	618
CrematogasterSubCLCMeta_rep_c1328	ref|XP_012057956.1| PREDICTED: rapamycin-insensitive companion of mTOR [Atta cephalotes]	330	354	886	424	433	1631	459	409	327	465	1107	585	389	767	540
CrematogasterSubCLCMeta_rep_c1329	ref|XP_011875700.1| PREDICTED: flap endonuclease GEN [Vollenhovia emeryi]	144	204	240	123	269	542	148	209	199	312	232	235	183	53	213
CrematogasterSubCLCMeta_rep_c1330	ref|XP_011860239.1| PREDICTED: syntaxin-binding protein 5 isoform X4 [Vollenhovia emeryi]	737	623	568	643	811	1017	691	429	1112	533	1688	527	1226	554	1005
CrematogasterSubCLCMeta_rep_c1331	ref|XP_011630419.1| PREDICTED: mitogen-activated protein kinase kinase kinase kinase 4 isoform X6 [Pogonomyrmex barbatus]	2273	2619	4097	2847	2490	4293	3068	2298	3101	2361	3738	2698	2836	4279	2762
CrematogasterSubCLCMeta_rep_c1332	ref|XP_011881076.1| PREDICTED: uncharacterized protein LOC105569323 isoform X1 [Vollenhovia emeryi]	4476	1135	2167	2421	3093	3092	4300	3459	4473	2520	4034	2210	2364	1763	1789
CrematogasterSubCLCMeta_rep_c1333	ref|XP_011862778.1| PREDICTED: GRAM domain-containing protein 1B-like isoform X2 [Vollenhovia emeryi]	7304	6027	8229	6185	7567	6506	7240	6681	6880	6548	6508	8567	7694	6487	7078
CrematogasterSubCLCMeta_rep_c1334	ref|XP_012524809.1| PREDICTED: dual specificity protein phosphatase CDC14B isoform X1 [Monomorium pharaonis]	448	757	717	444	828	906	675	433	936	614	1123	793	755	575	923
CrematogasterSubCLCMeta_rep_c1335	ref|XP_011878872.1| PREDICTED: neuromedin-U receptor 2-like isoform X2 [Vollenhovia emeryi]	419	96	201	139	891	842	621	661	945	612	226	219	1209	6	94
CrematogasterSubCLCMeta_rep_c1336	ref|XP_011164846.1| PREDICTED: bifunctional ATP-dependent dihydroxyacetone kinase/FAD-AMP lyase (cyclizing)-like [Solenopsis invicta]	947	997	323	642	644	333	1152	2027	433	457	197	360	649	367	733
CrematogasterSubCLCMeta_rep_c1337	#N/A	326	160	39	305	351	84	298	205	313	159	465	158	202	163	90
CrematogasterSubCLCMeta_rep_c1338	ref|XP_018305131.1| PREDICTED: PI-PLC X domain-containing protein 1-like [Trachymyrmex zeteki]	259	209	418	511	205	301	359	209	318	382	549	244	553	526	526
CrematogasterSubCLCMeta_rep_c1339	ref|XP_011867337.1| PREDICTED: LOW QUALITY PROTEIN: uncharacterized protein LOC105561718 [Vollenhovia emeryi]	28	136	8	54	242	255	354	41	505	28	399	157	50	0	367
CrematogasterSubCLCMeta_rep_c1340	ref|XP_018303711.1| PREDICTED: cationic amino acid transporter 2 [Trachymyrmex zeteki]	23	557	51	131	529	701	797	155	833	25	1014	380	351	86	849
CrematogasterSubCLCMeta_rep_c1341	ref|XP_011061284.1| PREDICTED: rootletin [Acromyrmex echinatior]	1564	439	789	1242	1125	1441	1011	626	1012	1147	157	649	291	569	806
CrematogasterSubCLCMeta_rep_c1342	ref|XP_015037627.1| uncharacterized protein Dpse_GA16016, isoform C [Drosophila pseudoobscura pseudoobscura]	12	309	76	90	89	50	176	28	146	65	232	380	76	68	331
CrematogasterSubCLCMeta_rep_c1343	ref|XP_011640049.1| PREDICTED: protein bric-a-brac 2 [Pogonomyrmex barbatus]	8	91	48	2	39	195	152	19	154	0	199	111	36	11	127
CrematogasterSubCLCMeta_rep_c1344	ref|XP_011064800.1| PREDICTED: coiled-coil domain-containing protein AGAP005037 [Acromyrmex echinatior]	360	364	391	294	338	740	368	151	182	410	881	289	371	281	601
CrematogasterSubCLCMeta_rep_c1345	ref|XP_011696303.1| PREDICTED: histone-lysine N-methyltransferase 2D [Wasmannia auropunctata]	82	95	283	57	93	1214	152	104	117	57	288	202	139	186	242
CrematogasterSubCLCMeta_rep_c1346	ref|XP_018364467.1| PREDICTED: HEAT repeat-containing protein 3 isoform X1 [Trachymyrmex cornetzi]	2661	2237	3072	2669	2970	2747	3514	3638	4282	3638	2750	3329	3114	3136	3547
CrematogasterSubCLCMeta_rep_c1347	ref|XP_018309701.1| PREDICTED: probable ATP-dependent RNA helicase DDX17 isoform X1 [Trachymyrmex zeteki]	750	1387	584	1075	1594	1953	2161	496	1939	640	2021	1078	708	948	1675
CrematogasterSubCLCMeta_rep_c1348	ref|XP_011699065.1| PREDICTED: protein kinase C-binding protein 1 isoform X2 [Wasmannia auropunctata]	2659	2362	2504	3426	3041	2362	3119	2856	2849	3667	1952	3443	2312	3133	3380
CrematogasterSubCLCMeta_rep_c1349	ref|XP_011156892.1| PREDICTED: uncharacterized protein LOC105193901 [Solenopsis invicta]	1435	772	513	1311	1412	905	1177	1398	595	2013	1504	674	1811	662	840
CrematogasterSubCLCMeta_rep_c1350	ref|XP_011062407.1| PREDICTED: hepatocyte nuclear factor 4-gamma isoform X3 [Acromyrmex echinatior]	15882	10773	11358	15294	14985	11383	12070	14108	14227	14059	10780	12114	10292	11662	14234
CrematogasterSubCLCMeta_rep_c1351	ref|XP_011867964.1| PREDICTED: collagen alpha-5(IV) chain isoform X1 [Vollenhovia emeryi]	2062	63	0	2256	472	4762	475	3607	2387	3298	800	650	4334	6	26
CrematogasterSubCLCMeta_rep_c1352	ref|XP_011064374.1| PREDICTED: interleukin-1 receptor accessory protein-like 1 [Acromyrmex echinatior]	14	47	235	0	51	248	65	38	56	49	181	84	53	113	83
CrematogasterSubCLCMeta_rep_c1353	ref|XP_012538211.1| PREDICTED: potassium channel subfamily T member 1 isoform X7 [Monomorium pharaonis]	4	70	19	33	131	138	125	17	163	21	189	56	39	24	92
CrematogasterSubCLCMeta_rep_c1354	ref|XP_003105195.1| CRE-AMX-3 protein [Caenorhabditis remanei]	0	0	6	0	0	0	15	0	0	0	0	12	0	0	5
CrematogasterSubCLCMeta_rep_c1355	ref|XP_011881697.1| PREDICTED: long-chain-fatty-acid--CoA ligase 4 isoform X2 [Vollenhovia emeryi]	18	686	85	0	111	537	254	56	139	0	264	321	6	48	361
CrematogasterSubCLCMeta_c1356	ref|XP_011687436.1| PREDICTED: uncharacterized protein LOC105449750 [Wasmannia auropunctata]	241	46	136	138	311	23	338	202	189	85	428	255	207	38	111
CrematogasterSubCLCMeta_rep_c1357	ref|XP_012062594.1| PREDICTED: signal-induced proliferation-associated 1-like protein 1 [Atta cephalotes]	460	247	510	647	908	788	1508	270	196	137	440	238	208	254	128
CrematogasterSubCLCMeta_rep_c1358	ref|XP_012234439.1| PREDICTED: uncharacterized protein LOC105679152 [Linepithema humile]	52	129	42	468	238	269	359	434	381	486	708	18	454	51	190
CrematogasterSubCLCMeta_rep_c1359	#N/A	0	0	10	14	0	45	0	0	4	29	28	0	17	15	32
CrematogasterSubCLCMeta_rep_c1360	ref|XP_011645465.1| PREDICTED: LOW QUALITY PROTEIN: KAT8 regulatory NSL complex subunit 3 [Pogonomyrmex barbatus]	52	14	41	155	66	126	50	24	92	133	561	45	188	40	11
CrematogasterSubCLCMeta_rep_c1361	ref|XP_011874728.1| PREDICTED: protein similar isoform X2 [Vollenhovia emeryi]	3952	3875	3688	3573	3305	4025	3423	3395	3901	3508	2816	3610	4139	3751	3912
CrematogasterSubCLCMeta_rep_c1362	ref|XP_011250812.1| PREDICTED: heat shock protein 83 [Camponotus floridanus]	0	0	15	46	39	2636	47	43	17	23	21	22	35	45	27
CrematogasterSubCLCMeta_rep_c1363	ref|XP_011863289.1| PREDICTED: CAP-Gly domain-containing linker protein 1-like [Vollenhovia emeryi]	411	570	214	484	528	539	623	268	583	418	424	383	234	288	503
CrematogasterSubCLCMeta_rep_c1364	ref|XP_018400217.1| PREDICTED: uncharacterized protein LOC108777752 isoform X2 [Cyphomyrmex costatus]	417	421	412	447	457	651	511	342	389	343	382	546	507	637	592
CrematogasterSubCLCMeta_rep_c1365	ref|XP_011700717.1| PREDICTED: dual 3',5'-cyclic-AMP and -GMP phosphodiesterase 11-like [Wasmannia auropunctata]	733	315	346	1771	1265	1047	1226	1187	1127	1541	2167	163	760	531	385
CrematogasterSubCLCMeta_rep_c1366	ref|XP_018338008.1| PREDICTED: uncharacterized protein LOC108746019 isoform X2 [Trachymyrmex septentrionalis]	2015	4353	4849	2991	2286	3791	1784	1808	2381	3920	1595	5624	2939	13537	6358
CrematogasterSubCLCMeta_c1367	ref|XP_012523775.1| PREDICTED: cadherin-23 [Monomorium pharaonis]	185	188	21	29	104	177	230	1	174	13	378	127	148	56	190
CrematogasterSubCLCMeta_rep_c1368	ref|XP_011684855.1| PREDICTED: uncharacterized protein LOC105448148 isoform X1 [Wasmannia auropunctata]	162	49	37	112	135	858	126	101	233	213	98	189	1056	16	179
CrematogasterSubCLCMeta_rep_c1369	ref|XP_011879441.1| PREDICTED: uncharacterized protein LOC105568399 isoform X2 [Vollenhovia emeryi]	235	165	452	198	247	275	350	277	370	113	230	315	780	471	237
CrematogasterSubCLCMeta_rep_c1370	ref|XP_012523352.1| PREDICTED: mothers against decapentaplegic homolog 3, partial [Monomorium pharaonis]	228	2096	2536	553	359	6039	297	166	197	121	717	2248	150	2555	2855
CrematogasterSubCLCMeta_rep_c1371	ref|XP_018302477.1| PREDICTED: ras-related protein Rab-37-like isoform X2 [Trachymyrmex zeteki]	140	393	331	111	92	391	217	145	142	35	52	296	265	290	306
CrematogasterSubCLCMeta_rep_c1372	ref|XP_018376230.1| PREDICTED: integrin-alpha FG-GAP repeat-containing protein 2-like [Trachymyrmex cornetzi]	53	843	35	19	770	1132	832	17	834	0	761	469	408	51	694
CrematogasterSubCLCMeta_rep_c1373	ref|XP_011697009.1| PREDICTED: RE1-silencing transcription factor B-like isoform X1 [Wasmannia auropunctata]	45	175	9	12	173	268	341	15	269	7	300	124	126	49	278
CrematogasterSubCLCMeta_rep_c1374	ref|XP_011680762.1| PREDICTED: uncharacterized protein LOC583642 [Strongylocentrotus purpuratus]	257	152	182	229	79	61	153	29	116	838	394	156	109	536	56
CrematogasterSubCLCMeta_rep_c1375	ref|XP_018644101.1| hypothetical protein Smp_191100 [Schistosoma mansoni]	73	56	55	103	52	24	50	16	44	140	90	136	28	207	17
CrematogasterSubCLCMeta_rep_c1376	ref|XP_014476760.1| PREDICTED: titin isoform X1 [Dinoponera quadriceps]	1730	5372	5832	2488	3220	4716	2338	4665	2879	1136	1853	3849	4118	6405	6410
CrematogasterSubCLCMeta_rep_c1377	ref|XP_011881019.1| PREDICTED: uncharacterized protein LOC105569282 isoform X2 [Vollenhovia emeryi]	401	859	1091	153	266	1210	126	944	262	403	149	956	1166	1139	410
CrematogasterSubCLCMeta_rep_c1378	ref|XP_011145162.1| PREDICTED: syntaxin isoform X6 [Harpegnathos saltator]	342	254	300	294	488	1578	891	253	1089	341	1451	305	784	60	241
CrematogasterSubCLCMeta_rep_c1379	ref|XP_011693723.1| PREDICTED: E3 ubiquitin-protein ligase SIAH1-like [Wasmannia auropunctata]	1241	894	1180	1044	1263	1194	1184	1178	1173	1343	1517	900	1415	973	1027
CrematogasterSubCLCMeta_rep_c1380	ref|XP_012529818.1| PREDICTED: polypyrimidine tract-binding protein 1 isoform X3 [Monomorium pharaonis]	757	1119	759	276	765	947	752	464	973	210	1338	170	889	525	694
CrematogasterSubCLCMeta_rep_c1381	ref|XP_011167764.1| PREDICTED: E3 ubiquitin-protein ligase RNF181-like [Solenopsis invicta]	58	858	453	176	584	1580	850	152	1292	34	985	1070	389	376	1581
CrematogasterSubCLCMeta_rep_c1382	ref|XP_011642735.1| PREDICTED: TAR DNA-binding protein 43 isoform X2 [Pogonomyrmex barbatus]	1907	1725	1922	1111	2054	2750	2963	1778	2411	2691	3301	391	2459	924	1189
CrematogasterSubCLCMeta_rep_c1383	ref|XP_018317222.1| PREDICTED: hepatocyte nuclear factor 6 [Trachymyrmex zeteki]	19	246	48	41	227	269	325	13	304	0	278	258	21	10	346
CrematogasterSubCLCMeta_rep_c1384	#N/A	162	176	143	106	154	177	233	110	216	84	311	203	154	91	150
CrematogasterSubCLCMeta_rep_c1385	#N/A	351	498	771	36	497	162	0	456	0	0	75	0	22	480	183
CrematogasterSubCLCMeta_rep_c1386	ref|XP_011860940.1| PREDICTED: GPI transamidase component PIG-S [Vollenhovia emeryi]	388	173	245	336	339	192	413	7	168	673	288	451	410	291	542
CrematogasterSubCLCMeta_rep_c1387	ref|XP_011880429.1| PREDICTED: uncharacterized protein LOC105568957 isoform X2 [Vollenhovia emeryi]	501	490	991	648	848	1298	701	381	547	410	950	644	980	642	1268
CrematogasterSubCLCMeta_rep_c1388	ref|XP_011867716.1| PREDICTED: calcium/calmodulin-dependent 3',5'-cyclic nucleotide phosphodiesterase 1A-like isoform X6 [Vollenhovia emeryi]	33	260	61	63	189	471	191	21	223	62	272	255	23	78	179
CrematogasterSubCLCMeta_rep_c1389	ref|XP_011163818.1| PREDICTED: DNA-binding protein Ikaros isoform X2 [Solenopsis invicta]	1930	1580	2218	1785	2108	1652	1687	1804	2043	1630	1246	1908	2037	1779	1655
CrematogasterSubCLCMeta_rep_c1390	ref|XP_011871231.1| PREDICTED: signal transducer and activator of transcription 5B [Vollenhovia emeryi]	1748	2148	1359	1899	2362	6082	2977	1955	2714	2070	3416	1151	1889	2894	2280
CrematogasterSubCLCMeta_rep_c1391	ref|XP_011869019.1| PREDICTED: NADH dehydrogenase [ubiquinone] iron-sulfur protein 4, mitochondrial [Vollenhovia emeryi]	112	199	115	139	319	188	180	177	570	647	661	502	291	35	199
CrematogasterSubCLCMeta_rep_c1392	ref|XP_011156886.1| PREDICTED: protein RUFY3 isoform X3 [Solenopsis invicta]	268	334	91	295	923	555	1110	317	1161	387	927	334	354	183	350
CrematogasterSubCLCMeta_rep_c1393	ref|XP_011869489.1| PREDICTED: patronin isoform X4 [Vollenhovia emeryi]	809	549	892	1019	1309	797	935	780	1095	838	2247	684	1530	701	887
CrematogasterSubCLCMeta_rep_c1394	ref|XP_011871963.1| PREDICTED: glutamate--cysteine ligase catalytic subunit isoform X1 [Vollenhovia emeryi]	1021	701	1261	908	798	1046	738	560	633	849	2834	1049	994	1000	1197
CrematogasterSubCLCMeta_rep_c1395	ref|XP_011648323.1| PREDICTED: integrator complex subunit 2 isoform X1 [Pogonomyrmex barbatus]	3270	3322	2229	1269	1024	1209	1223	3258	2123	1517	1057	1964	2816	1237	2772
CrematogasterSubCLCMeta_rep_c1396	ref|XP_011640416.1| PREDICTED: triple functional domain protein isoform X5 [Pogonomyrmex barbatus]	1841	1035	4397	2199	2496	1919	2133	1937	2815	2418	2806	1860	2889	1452	1580
CrematogasterSubCLCMeta_rep_c1397	ref|XP_012222366.1| PREDICTED: LOW QUALITY PROTEIN: uncharacterized protein LOC105672186, partial [Linepithema humile]	194	341	282	197	415	418	24	23	151	83	363	422	165	334	428
CrematogasterSubCLCMeta_rep_c1398	ref|XP_012542222.1| PREDICTED: regulating synaptic membrane exocytosis protein 2 isoform X1 [Monomorium pharaonis]	0	732	101	31	450	547	466	0	814	49	607	248	19	0	615
CrematogasterSubCLCMeta_rep_c1399	ref|XP_011862738.1| PREDICTED: talin-1 isoform X2 [Vollenhovia emeryi]	72	371	764	166	118	2476	622	79	1017	938	6	419	192	688	37
CrematogasterSubCLCMeta_rep_c1400	#N/A	68	76	113	151	205	111	183	63	242	69	481	227	85	90	190
CrematogasterSubCLCMeta_rep_c1401	ref|XP_011701140.1| PREDICTED: uncharacterized protein LOC105457901 isoform X2 [Wasmannia auropunctata]	222	188	330	138	278	615	325	239	421	476	755	336	392	399	359
CrematogasterSubCLCMeta_rep_c1402	ref|XP_012529380.1| PREDICTED: transcription factor collier isoform X3 [Monomorium pharaonis]	174	981	1563	308	451	1432	1115	925	776	809	704	1555	565	1100	1273
CrematogasterSubCLCMeta_rep_c1403	ref|XP_011875662.1| PREDICTED: ribokinase-like [Vollenhovia emeryi]	2348	1117	1725	1509	1466	1695	1651	2528	1882	1354	1075	1278	1372	950	1455
CrematogasterSubCLCMeta_rep_c1404	ref|XP_011065706.1| PREDICTED: zinc finger homeobox protein 3 isoform X2 [Acromyrmex echinatior]	41	164	124	130	152	410	301	101	310	135	284	209	241	140	408
CrematogasterSubCLCMeta_rep_c1405	ref|XP_018368204.1| PREDICTED: enolase-phosphatase E1 [Trachymyrmex cornetzi]	207	159	175	232	162	281	179	207	204	144	311	140	364	123	210
CrematogasterSubCLCMeta_rep_c1406	ref|XP_011693348.1| PREDICTED: serine/arginine repetitive matrix protein 2 [Wasmannia auropunctata]	2288	2423	1027	4434	3869	1688	2848	4565	4028	5197	7769	941	3918	1797	2940
CrematogasterSubCLCMeta_c1407	ref|XP_012533378.1| PREDICTED: 1,2-dihydroxy-3-keto-5-methylthiopentene dioxygenase [Monomorium pharaonis]	110	60	25	72	34	34	24	26	69	27	26	40	35	38	38
CrematogasterSubCLCMeta_rep_c1408	ref|XP_011863721.1| PREDICTED: unconventional myosin-XVIIIa-like isoform X2 [Vollenhovia emeryi]	181	838	1453	531	224	1394	439	364	624	76	220	881	664	671	753
CrematogasterSubCLCMeta_rep_c1409	ref|XP_018308752.1| PREDICTED: facilitated trehalose transporter Tret1 isoform X1 [Trachymyrmex zeteki]	37761	565	148	11244	21548	334	12113	23530	14994	11282	24349	444	7866	686	310
CrematogasterSubCLCMeta_rep_c1410	ref|XP_011707812.1| PREDICTED: uncharacterized protein LOC105462704 isoform X2 [Wasmannia auropunctata]	999	731	1105	786	982	1664	1185	794	1199	886	2301	1040	1248	624	1057
CrematogasterSubCLCMeta_rep_c1411	ref|XP_011871417.1| PREDICTED: putative transcription factor SOX-15 isoform X2 [Vollenhovia emeryi]	149	696	857	179	116	644	91	0	347	1182	436	680	107	1086	644
CrematogasterSubCLCMeta_rep_c1412	ref|XP_011161086.1| PREDICTED: orphan steroid hormone receptor 2 isoform X2 [Solenopsis invicta]	692	674	855	849	721	2121	686	585	701	890	616	1000	859	1328	1035
CrematogasterSubCLCMeta_rep_c1413	ref|XP_011861785.1| PREDICTED: DNA repair protein complementing XP-G cells [Vollenhovia emeryi]	155	116	117	115	147	215	155	81	134	74	299	111	182	130	149
CrematogasterSubCLCMeta_rep_c1414	ref|XP_011871555.1| PREDICTED: phospholipid-transporting ATPase ID isoform X3 [Vollenhovia emeryi]	741	524	713	615	451	737	381	331	651	378	4361	392	670	950	916
CrematogasterSubCLCMeta_rep_c1415	ref|XP_011061183.1| PREDICTED: glutamate receptor ionotropic, kainate 2 isoform X2 [Acromyrmex echinatior]	0	133	0	23	157	195	139	8	262	0	151	238	22	4	208
CrematogasterSubCLCMeta_rep_c1416	ref|XP_011862302.1| PREDICTED: CWF19-like protein 1 [Vollenhovia emeryi]	794	580	868	620	1064	1112	1210	905	792	916	1115	596	965	926	1011
CrematogasterSubCLCMeta_rep_c1417	ref|XP_018365908.1| PREDICTED: carnitine O-acetyltransferase isoform X1 [Trachymyrmex cornetzi]	2882	127	487	1665	2266	572	2262	2332	2225	2072	1961	211	1892	128	1135
CrematogasterSubCLCMeta_rep_c1418	ref|XP_011336342.1| PREDICTED: uncharacterized protein LOC105278736 isoform X4 [Ooceraea biroi]	1039	786	758	1737	1444	400	1198	814	1078	1244	786	1584	875	729	1402
CrematogasterSubCLCMeta_rep_c1419	ref|XP_011700562.1| PREDICTED: zinc finger and BTB domain-containing protein 14-like isoform X1 [Wasmannia auropunctata]	13	460	217	28	106	408	171	61	200	118	230	262	187	230	482
CrematogasterSubCLCMeta_rep_c1420	ref|XP_012542365.1| PREDICTED: F-BAR and double SH3 domains protein 2 [Monomorium pharaonis]	5057	4491	3045	4769	5074	5202	5248	2652	4650	3158	2585	5669	4919	3494	5002
CrematogasterSubCLCMeta_rep_c1421	ref|XP_011703508.1| PREDICTED: IQ motif and SEC7 domain-containing protein 1 isoform X2 [Wasmannia auropunctata]	2070	1570	3099	1512	2129	4235	2213	2173	2574	927	2183	2492	1734	2166	2509
CrematogasterSubCLCMeta_rep_c1422	ref|XP_011167026.1| PREDICTED: uncharacterized protein LOC105200923 [Solenopsis invicta]	8	327	40	30	366	377	555	46	554	0	493	226	49	69	389
CrematogasterSubCLCMeta_rep_c1423	ref|XP_011055770.1| PREDICTED: serine/threonine-protein kinase BRSK2 isoform X3 [Acromyrmex echinatior]	0	177	6	30	155	205	154	18	208	0	156	67	29	14	187
CrematogasterSubCLCMeta_rep_c1424	ref|XP_011861948.1| PREDICTED: synaptotagmin-14 isoform X1 [Vollenhovia emeryi]	70	322	16	113	297	801	478	51	553	89	689	223	59	10	461
CrematogasterSubCLCMeta_rep_c1425	ref|XP_018312671.1| PREDICTED: phosphoinositide 3-kinase regulatory subunit 4 [Trachymyrmex zeteki]	187	136	276	160	149	137	216	117	256	129	259	152	336	133	107
CrematogasterSubCLCMeta_rep_c1426	ref|XP_011703984.1| PREDICTED: monocyte to macrophage differentiation factor 2 isoform X1 [Wasmannia auropunctata]	2251	1690	2095	2432	1668	2394	1820	1664	1827	2128	1767	1862	1493	1724	2087
CrematogasterSubCLCMeta_rep_c1427	ref|XP_011064340.1| PREDICTED: uncharacterized protein LOC105152015 isoform X1 [Acromyrmex echinatior]	9204	4067	4573	7397	4887	6657	7246	7041	7213	15562	4014	8118	6067	11304	5737
CrematogasterSubCLCMeta_rep_c1428	ref|XP_011705517.1| PREDICTED: synaptic vesicle glycoprotein 2B [Wasmannia auropunctata]	5654	4455	6455	5387	6284	5189	6949	5561	5868	5313	10321	6203	6614	4933	15530
CrematogasterSubCLCMeta_rep_c1429	ref|XP_018304053.1| PREDICTED: insulin-like receptor [Trachymyrmex zeteki]	385	600	714	394	688	667	692	367	801	443	1264	505	1157	416	934
CrematogasterSubCLCMeta_rep_c1430	ref|XP_015509318.1| PREDICTED: probable chitinase 3 [Neodiprion lecontei]	1	58	43	11	96	124	87	14	90	0	205	79	44	15	84
CrematogasterSubCLCMeta_rep_c1431	ref|XP_011883574.1| PREDICTED: early growth response protein 1, partial [Vollenhovia emeryi]	205	371	927	425	229	82	181	245	574	542	157	129	408	231	142
CrematogasterSubCLCMeta_rep_c1432	ref|XP_011874994.1| PREDICTED: protein Skeletor, isoforms B/C [Vollenhovia emeryi]	93	124	555	22	139	173	129	7	130	7	176	56	49	313	96
CrematogasterSubCLCMeta_rep_c1433	ref|XP_011698672.1| PREDICTED: uncharacterized protein LOC105456393 isoform X1 [Wasmannia auropunctata]	782	424	188	384	112	730	129	763	897	345	818	234	1235	0	1250
CrematogasterSubCLCMeta_rep_c1434	ref|XP_011866980.1| PREDICTED: ATP-binding cassette sub-family A member 5-like isoform X1 [Vollenhovia emeryi]	183	281	123	152	361	378	321	198	489	61	419	186	131	175	484
CrematogasterSubCLCMeta_rep_c1435	ref|XP_011686174.1| PREDICTED: protein deadpan [Wasmannia auropunctata]	193	559	630	302	373	564	385	245	279	334	588	585	333	726	884
CrematogasterSubCLCMeta_rep_c1436	ref|XP_011871107.1| PREDICTED: protein disulfide-isomerase A3 [Vollenhovia emeryi]	2586	1103	2203	1988	2009	3893	2322	1995	2136	1387	3927	195	2313	1625	1339
CrematogasterSubCLCMeta_rep_c1437	ref|XP_011860077.1| PREDICTED: aminopeptidase N-like, partial [Vollenhovia emeryi]	4640	1789	3620	5262	3023	8327	3688	3718	6175	4693	1427	2696	3078	5131	4621
CrematogasterSubCLCMeta_rep_c1438	ref|XP_011630488.1| PREDICTED: nucleobindin-2 isoform X1 [Pogonomyrmex barbatus]	10446	5672	5557	8835	8376	6540	9762	10671	8325	6698	4491	8279	7872	7881	7784
CrematogasterSubCLCMeta_rep_c1439	ref|XP_012526764.1| PREDICTED: selenide, water dikinase-like [Monomorium pharaonis]	19	23	29	28	56	5	25	30	58	41	150	37	23	23	110
CrematogasterSubCLCMeta_rep_c1440	ref|XP_011160864.1| PREDICTED: presequence protease, mitochondrial [Solenopsis invicta]	1185	1216	1327	1289	928	291	1317	1185	1102	908	1070	1759	970	1206	1576
CrematogasterSubCLCMeta_rep_c1441	ref|XP_011346227.1| PREDICTED: eukaryotic translation initiation factor 4 gamma 2 isoform X1 [Ooceraea biroi]	3746	2076	1987	3446	4219	3324	3290	3619	3402	3738	4653	2391	5697	3755	2740
CrematogasterSubCLCMeta_rep_c1442	ref|XP_011171571.1| PREDICTED: uncharacterized protein LOC105204217 [Solenopsis invicta]	333	69	64	459	499	143	239	66	260	274	136	70	170	66	53
CrematogasterSubCLCMeta_rep_c1443	ref|XP_018304335.1| PREDICTED: rho GTPase-activating protein 190 isoform X1 [Trachymyrmex zeteki]	243	245	296	322	360	556	403	251	403	189	948	208	493	456	464
CrematogasterSubCLCMeta_rep_c1444	ref|XP_011871146.1| PREDICTED: uncharacterized protein LOC105563823 isoform X1 [Vollenhovia emeryi]	5325	2833	5427	4581	2817	4381	5066	3798	4662	4534	4302	4589	2340	4344	5204
CrematogasterSubCLCMeta_rep_c1445	ref|XP_018400378.1| PREDICTED: myosin heavy chain 95F [Cyphomyrmex costatus]	13473	9369	7968	19208	11386	11726	10597	12863	10017	13323	5917	4241	7937	16204	9038
CrematogasterSubCLCMeta_rep_c1446	ref|XP_011860781.1| PREDICTED: rho guanine nucleotide exchange factor 18-like isoform X9 [Vollenhovia emeryi]	169	177	212	205	443	680	212	271	429	93	356	213	441	430	320
CrematogasterSubCLCMeta_rep_c1447	ref|XP_018361125.1| PREDICTED: restin homolog isoform X8 [Trachymyrmex cornetzi]	4524	1029	3468	4543	4076	1689	3967	1660	2627	3034	1490	2833	1834	2141	4552
CrematogasterSubCLCMeta_rep_c1448	ref|XP_011699804.1| PREDICTED: serine/threonine-protein kinase ATR isoform X2 [Wasmannia auropunctata]	138	88	69	119	181	209	188	182	194	265	262	66	282	71	171
CrematogasterSubCLCMeta_rep_c1449	#N/A	19	144	50	47	153	148	152	18	157	1	245	90	39	23	113
CrematogasterSubCLCMeta_rep_c1450	ref|XP_011700984.1| PREDICTED: putative polypeptide N-acetylgalactosaminyltransferase 9 isoform X1 [Wasmannia auropunctata]	280	101	30	87	271	322	270	82	379	184	500	214	152	167	141
CrematogasterSubCLCMeta_rep_c1451	ref|NP_001022938.1| Uncharacterized protein CELE_Y71H2B.10 [Caenorhabditis elegans]	136	190	214	61	162	132	173	94	179	33	209	98	143	58	96
CrematogasterSubCLCMeta_rep_c1452	ref|XP_011870780.1| PREDICTED: rho guanine nucleotide exchange factor 17 isoform X2 [Vollenhovia emeryi]	411	398	604	683	996	1245	585	801	753	810	667	239	696	222	317
CrematogasterSubCLCMeta_rep_c1453	ref|XP_011689701.1| PREDICTED: cell division cycle protein 27 homolog [Wasmannia auropunctata]	1080	405	281	493	754	555	867	785	828	483	893	659	870	555	688
CrematogasterSubCLCMeta_rep_c1454	ref|XP_018345318.1| PREDICTED: uncharacterized protein LOC108750401 [Trachymyrmex septentrionalis]	27	210	45	52	181	313	334	48	328	0	320	246	116	9	226
CrematogasterSubCLCMeta_rep_c1455	ref|XP_017762218.1| PREDICTED: facilitated trehalose transporter Tret1-2 homolog, partial [Eufriesea mexicana]	51	155	148	312	170	214	198	253	255	125	204	220	59	310	333
CrematogasterSubCLCMeta_rep_c1456	ref|XP_011159338.1| PREDICTED: very low-density lipoprotein receptor-like isoform X4 [Solenopsis invicta]	141	292	562	352	391	722	292	231	412	248	129	179	214	271	398
CrematogasterSubCLCMeta_rep_c1457	ref|XP_018366257.1| PREDICTED: putative thiamine transporter SLC35F3 isoform X5 [Trachymyrmex cornetzi]	274	367	40	385	340	102	511	123	593	171	328	504	288	195	239
CrematogasterSubCLCMeta_rep_c1458	ref|XP_011160151.1| PREDICTED: myosin-VIIa [Solenopsis invicta]	504	441	738	503	278	629	374	329	357	366	779	406	927	752	765
CrematogasterSubCLCMeta_rep_c1459	ref|XP_012536402.1| PREDICTED: presenilins-associated rhomboid-like protein, mitochondrial [Monomorium pharaonis]	0	0	0	0	0	211	0	0	0	0	0	0	0	0	0
CrematogasterSubCLCMeta_rep_c1460	ref|XP_011163698.1| PREDICTED: presenilins-associated rhomboid-like protein, mitochondrial [Solenopsis invicta]	2076	348	876	1799	1520	578	1526	1725	1582	3006	1145	893	1974	671	568
CrematogasterSubCLCMeta_rep_c1461	ref|XP_011695406.1| PREDICTED: uncharacterized protein LOC105454485 [Wasmannia auropunctata]	18	69	39	661	72	127	430	4	83	199	65	102	1332	255	84
CrematogasterSubCLCMeta_rep_c1462	ref|XP_011866601.1| PREDICTED: uncharacterized protein LOC105561337 [Vollenhovia emeryi]	60	166	61	50	142	194	154	53	227	0	175	108	90	90	242
CrematogasterSubCLCMeta_rep_c1463	ref|XP_011166623.1| PREDICTED: transcription initiation factor TFIID subunit 3-like isoform X1 [Solenopsis invicta]	153	109	214	117	149	138	115	97	157	0	88	103	116	124	95
CrematogasterSubCLCMeta_c1464	ref|XP_011063319.1| PREDICTED: uncharacterized protein LOC105151342 [Acromyrmex echinatior]	11	167	11	5	207	212	173	15	339	0	315	152	28	72	218
CrematogasterSubCLCMeta_rep_c1465	ref|XP_018392583.1| PREDICTED: UPF0553 protein C9orf64 homolog [Cyphomyrmex costatus]	320	479	434	306	451	458	393	178	503	379	545	472	254	156	442
CrematogasterSubCLCMeta_rep_c1466	ref|XP_012524019.1| PREDICTED: uncharacterized protein LOC105829583 [Monomorium pharaonis]	249	135	257	255	161	306	350	182	274	183	245	176	286	257	303
CrematogasterSubCLCMeta_rep_c1467	ref|XP_011881311.1| PREDICTED: platelet endothelial aggregation receptor 1 [Vollenhovia emeryi]	273	56	336	278	164	649	116	274	384	328	1084	198	325	366	145
CrematogasterSubCLCMeta_rep_c1468	ref|XP_011691327.1| PREDICTED: sodium- and chloride-dependent GABA transporter 1-like [Wasmannia auropunctata]	0	398	7	12	396	261	540	21	698	0	652	417	11	41	645
CrematogasterSubCLCMeta_rep_c1469	ref|XP_019883753.1| PREDICTED: frequenin-1 [Camponotus floridanus]	36	1107	53	96	1360	609	1566	49	2409	96	1911	614	74	12	1062
CrematogasterSubCLCMeta_rep_c1470	ref|XP_018406384.1| PREDICTED: uncharacterized protein LOC108782578 [Cyphomyrmex costatus]	80	125	70	252	191	250	204	130	335	65	368	184	75	89	220
CrematogasterSubCLCMeta_rep_c1471	ref|XP_003375245.1| putative integrase core domain protein [Trichinella spiralis]	214	58	49	94	136	17	183	85	122	284	284	175	170	315	116
CrematogasterSubCLCMeta_rep_c1472	ref|XP_018301732.1| PREDICTED: ubiquitin carboxyl-terminal hydrolase 4-like isoform X3 [Trachymyrmex zeteki]	3409	3401	5901	5597	3637	5417	3805	3706	4149	5222	7508	4555	4071	6250	4508
CrematogasterSubCLCMeta_rep_c1473	ref|XP_018353303.1| PREDICTED: sphingomyelin synthase-related 1-like [Trachymyrmex septentrionalis]	605	515	812	694	622	510	611	505	716	562	852	707	882	536	645
CrematogasterSubCLCMeta_rep_c1474	ref|XP_011878699.1| PREDICTED: protein unc-13 homolog D isoform X11 [Vollenhovia emeryi]	1940	1134	1606	1722	1335	1615	1139	1657	1659	1356	1496	1140	1390	1454	1503
CrematogasterSubCLCMeta_rep_c1475	ref|XP_011685050.1| PREDICTED: scavenger receptor class B member 1 isoform X1 [Wasmannia auropunctata]	11141	9783	14966	8428	5691	2849	4137	8288	4176	7528	3708	8620	4096	11595	23335
CrematogasterSubCLCMeta_rep_c1476	ref|XP_011687276.1| PREDICTED: transmembrane protein C5orf28 isoform X2 [Wasmannia auropunctata]	70	87	110	0	12	40	0	25	41	69	9	196	115	68	231
CrematogasterSubCLCMeta_rep_c1477	ref|XP_012063037.1| PREDICTED: uncharacterized protein LOC105626346 [Atta cephalotes]	664	222	423	205	115	472	210	350	251	184	419	278	473	553	281
CrematogasterSubCLCMeta_rep_c1478	ref|XP_011173608.1| PREDICTED: calcium-binding mitochondrial carrier protein SCaMC-2-A isoform X2 [Solenopsis invicta]	1294	790	861	851	882	1231	1088	928	799	674	5243	572	1236	1465	635
CrematogasterSubCLCMeta_rep_c1479	ref|XP_011688186.1| PREDICTED: LOW QUALITY PROTEIN: bromodomain-containing protein DDB_G0270170 [Wasmannia auropunctata]	289	326	316	237	335	620	210	231	435	136	340	201	251	258	246
CrematogasterSubCLCMeta_rep_c1480	ref|XP_011641895.1| PREDICTED: eukaryotic initiation factor 4A-III [Pogonomyrmex barbatus]	86	89	87	38	215	174	272	52	114	0	110	122	115	0	235
CrematogasterSubCLCMeta_rep_c1481	ref|XP_011635147.1| PREDICTED: BTB/POZ domain-containing protein KCTD3 isoform X3 [Pogonomyrmex barbatus]	1303	1027	1540	1368	1186	1551	1256	1254	1605	1262	1866	1185	1352	1033	1282
CrematogasterSubCLCMeta_rep_c1482	ref|XP_011702273.1| PREDICTED: microprocessor complex subunit DGCR8 isoform X1 [Wasmannia auropunctata]	212	120	127	161	105	159	141	123	159	218	293	137	161	168	151
CrematogasterSubCLCMeta_rep_c1483	ref|XP_011873328.1| PREDICTED: receptor-type tyrosine-protein phosphatase F-like [Vollenhovia emeryi]	120	64	141	229	183	169	248	80	221	141	12	231	312	1161	343
CrematogasterSubCLCMeta_rep_c1484	ref|XP_018301255.1| PREDICTED: gonadotropin-releasing hormone II receptor-like isoform X2 [Trachymyrmex zeteki]	3	2	2	80	0	969	143	1	0	0	0	5	0	2	0
CrematogasterSubCLCMeta_rep_c1485	ref|XP_011869684.1| PREDICTED: gonadotropin-releasing hormone II receptor [Vollenhovia emeryi]	9013	3065	661	3836	8720	533	535	3299	3313	975	1223	6559	7781	5068	13746
CrematogasterSubCLCMeta_rep_c1486	ref|XP_012539442.1| PREDICTED: uncharacterized protein LOC105838433 isoform X2 [Monomorium pharaonis]	26	140	126	203	1	556	0	475	154	929	312	34	89	0	7
CrematogasterSubCLCMeta_rep_c1487	ref|XP_011875537.1| PREDICTED: U2 snRNP-associated SURP motif-containing protein isoform X1 [Vollenhovia emeryi]	678	1423	2283	882	1090	1517	1173	736	1038	1068	1368	1640	965	2202	1565
CrematogasterSubCLCMeta_rep_c1488	ref|XP_011876683.1| PREDICTED: probable trans-2-enoyl-CoA reductase, mitochondrial [Vollenhovia emeryi]	1226	133	422	816	637	608	734	503	734	622	516	324	727	430	478
CrematogasterSubCLCMeta_rep_c1489	ref|XP_018370334.1| PREDICTED: inositol hexakisphosphate and diphosphoinositol-pentakisphosphate kinase 2 isoform X4 [Trachymyrmex cornetzi]	61	215	298	21	153	1270	402	3	9	528	203	274	149	84	183
CrematogasterSubCLCMeta_rep_c1490	ref|XP_011866913.1| PREDICTED: uncharacterized protein LOC105561494 isoform X1 [Vollenhovia emeryi]	145	125	394	97	159	249	167	330	310	89	98	240	128	29	222
CrematogasterSubCLCMeta_rep_c1491	ref|XP_018306677.1| PREDICTED: acyl-CoA-binding domain-containing protein 6-like [Trachymyrmex zeteki]	1563	1757	2366	1018	784	2023	1101	1970	1547	1509	1575	2056	1417	2170	2017
CrematogasterSubCLCMeta_rep_c1492	ref|XP_011870548.1| PREDICTED: uncharacterized protein LOC105563521 [Vollenhovia emeryi]	84	105	278	81	82	103	84	92	48	0	63	152	98	132	93
CrematogasterSubCLCMeta_rep_c1493	ref|XP_011697933.1| PREDICTED: Krueppel-like factor 6 isoform X1 [Wasmannia auropunctata]	295	173	368	464	419	274	350	280	462	138	1541	95	412	561	502
CrematogasterSubCLCMeta_rep_c1494	ref|XP_018301878.1| PREDICTED: uncharacterized protein LOC108721701 [Trachymyrmex zeteki]	305	97	160	178	227	129	323	304	104	237	92	157	440	97	441
CrematogasterSubCLCMeta_rep_c1495	ref|XP_018301878.1| PREDICTED: uncharacterized protein LOC108721701 [Trachymyrmex zeteki]	590	740	3491	844	701	567	730	583	954	442	2029	638	841	1537	791
CrematogasterSubCLCMeta_rep_c1496	ref|XP_018315590.1| PREDICTED: transcription elongation regulator 1 isoform X2 [Trachymyrmex zeteki]	1459	1046	2194	1084	1719	1586	1657	1397	1817	1513	1925	1697	1612	1208	1953
CrematogasterSubCLCMeta_rep_c1497	ref|XP_012523267.1| PREDICTED: eukaryotic translation initiation factor 3 subunit G isoform X1 [Monomorium pharaonis]	113	410	495	422	288	648	349	327	391	466	642	952	40	695	913
CrematogasterSubCLCMeta_rep_c1498	ref|XP_012525661.1| PREDICTED: hrp65 protein-like [Monomorium pharaonis]	271	263	264	277	167	196	219	186	307	349	687	148	361	197	225
CrematogasterSubCLCMeta_rep_c1499	ref|XP_017795781.1| PREDICTED: LOW QUALITY PROTEIN: uncharacterized protein LOC108577181 [Habropoda laboriosa]	90	80	191	334	102	111	103	118	133	33	105	87	116	204	328
CrematogasterSubCLCMeta_rep_c1500	ref|XP_011881717.1| PREDICTED: protein disabled isoform X2 [Vollenhovia emeryi]	0	101	17	13	123	129	123	12	154	7	150	93	34	25	110
CrematogasterSubCLCMeta_rep_c1501	ref|XP_011879313.1| PREDICTED: peroxisome assembly factor 2 [Vollenhovia emeryi]	977	940	1623	1094	1208	1438	1143	634	884	566	1293	1317	871	1564	1476
CrematogasterSubCLCMeta_rep_c1502	ref|XP_011866374.1| PREDICTED: uncharacterized protein LOC105561207 isoform X2 [Vollenhovia emeryi]	0	39	68	121	40	47	30	73	105	0	54	40	10	149	103
CrematogasterSubCLCMeta_rep_c1503	ref|XP_018377008.1| PREDICTED: serrate RNA effector molecule homolog isoform X1 [Trachymyrmex cornetzi]	261	217	240	276	301	881	324	292	290	0	542	383	281	259	312
CrematogasterSubCLCMeta_rep_c1504	ref|XP_011646373.1| PREDICTED: frizzled-7-B [Pogonomyrmex barbatus]	1328	869	1058	1379	1425	1074	981	860	904	1042	541	846	816	1270	1354
CrematogasterSubCLCMeta_rep_c1505	ref|XP_011867469.1| PREDICTED: uncharacterized protein LOC105561778 isoform X2 [Vollenhovia emeryi]	234	41	124	402	55	83	0	52	52	134	20	66	67	7	42
CrematogasterSubCLCMeta_rep_c1506	ref|XP_011867469.1| PREDICTED: uncharacterized protein LOC105561778 isoform X2 [Vollenhovia emeryi]	367	101	337	170	310	299	357	163	349	170	268	329	377	480	205
CrematogasterSubCLCMeta_rep_c1507	ref|XP_011693188.1| PREDICTED: E3 ubiquitin-protein ligase NEDD4 isoform X3 [Wasmannia auropunctata]	550	640	383	239	773	279	328	478	620	297	665	650	254	846	1049
CrematogasterSubCLCMeta_rep_c1508	ref|XP_018304913.1| PREDICTED: uncharacterized protein LOC108723568 [Trachymyrmex zeteki]	58	75	107	282	101	139	114	163	344	139	116	199	237	426	287
CrematogasterSubCLCMeta_rep_c1509	ref|XP_011159034.1| PREDICTED: zinc finger MYM-type protein 3 [Solenopsis invicta]	489	532	701	669	779	1020	737	448	661	334	997	678	598	621	766
CrematogasterSubCLCMeta_rep_c1510	ref|XP_011878778.1| PREDICTED: prominin-1-A isoform X1 [Vollenhovia emeryi]	27	28	182	82	259	133	235	161	144	64	168	108	237	0	90
CrematogasterSubCLCMeta_rep_c1511	ref|XP_012062000.1| PREDICTED: palmitoyltransferase ZDHHC2-like, partial [Atta cephalotes]	97	52	65	81	73	184	29	56	48	0	64	72	41	31	74
CrematogasterSubCLCMeta_rep_c1512	ref|XP_011054233.1| PREDICTED: cAMP-specific 3',5'-cyclic phosphodiesterase, isoform F isoform X11 [Acromyrmex echinatior]	4980	4411	3909	4412	5474	3842	5375	3951	5180	4954	21801	4945	3017	5837	5900
CrematogasterSubCLCMeta_rep_c1513	ref|XP_018375513.1| PREDICTED: B-cell receptor-associated protein 31 [Trachymyrmex cornetzi]	1144	329	1163	1219	905	3686	1454	344	339	1297	28	3	40	739	219
CrematogasterSubCLCMeta_rep_c1514	ref|XP_018046351.1| PREDICTED: 60S ribosomal export protein NMD3 [Atta colombica]	184	2220	4162	411	108	683	142	714	584	88	904	3698	920	2662	2660
CrematogasterSubCLCMeta_rep_c1515	ref|XP_011692733.1| PREDICTED: 3-hydroxyisobutyrate dehydrogenase, mitochondrial [Wasmannia auropunctata]	0	281	214	62	0	263	0	15	66	0	0	213	33	138	160
CrematogasterSubCLCMeta_rep_c1516	ref|XP_011165438.1| PREDICTED: UDP-glucuronosyltransferase 2B20-like [Solenopsis invicta]	1043	1937	2049	2130	224	671	679	1030	621	464	244	5803	217	3209	3613
CrematogasterSubCLCMeta_rep_c1517	ref|XP_012527161.1| PREDICTED: homeobox protein caupolican-like [Monomorium pharaonis]	15	99	138	72	95	112	90	56	103	57	34	67	59	83	107
CrematogasterSubCLCMeta_rep_c1518	ref|XP_012230683.1| PREDICTED: MOB kinase activator-like 2 isoform X1 [Linepithema humile]	133	149	85	81	143	249	654	586	318	117	609	163	305	48	111
CrematogasterSubCLCMeta_rep_c1519	ref|XP_011699908.1| PREDICTED: eukaryotic translation initiation factor 3 subunit A [Wasmannia auropunctata]	535	221	265	447	204	141	345	188	239	378	1925	271	936	275	570
CrematogasterSubCLCMeta_rep_c1520	ref|XP_018307937.1| PREDICTED: uncharacterized protein LOC108725416 [Trachymyrmex zeteki]	381	714	881	582	467	370	596	297	661	342	709	433	472	837	960
CrematogasterSubCLCMeta_rep_c1521	ref|XP_011635797.1| PREDICTED: potassium voltage-gated channel subfamily H member 6 isoform X9 [Pogonomyrmex barbatus]	23	487	309	164	96	2250	124	269	285	0	252	542	142	1119	951
CrematogasterSubCLCMeta_rep_c1522	ref|XP_014470275.1| PREDICTED: coronin-2B-like isoform X2 [Dinoponera quadriceps]	240	256	522	362	270	259	209	154	288	265	179	716	351	393	530
CrematogasterSubCLCMeta_rep_c1523	ref|XP_011868081.1| PREDICTED: uncharacterized protein LOC105562133 isoform X1 [Vollenhovia emeryi]	1606	1324	801	2129	1675	1848	1573	1241	1839	1821	2961	385	1502	1015	632
CrematogasterSubCLCMeta_rep_c1524	#N/A	134	45	92	130	95	67	16	223	71	224	158	150	130	145	169
CrematogasterSubCLCMeta_rep_c1525	ref|XP_011638695.1| PREDICTED: zinc transporter ZIP11 isoform X1 [Pogonomyrmex barbatus]	232	82	144	200	192	206	493	169	320	108	276	66	349	108	90
CrematogasterSubCLCMeta_rep_c1526	ref|XP_019883748.1| PREDICTED: sorting nexin-6 isoform X2 [Camponotus floridanus]	1190	801	1389	1267	1155	1273	1472	872	1201	915	1482	1221	1070	983	1174
CrematogasterSubCLCMeta_rep_c1527	ref|XP_011865370.1| PREDICTED: 1-phosphatidylinositol 4,5-bisphosphate phosphodiesterase gamma-1 isoform X3 [Vollenhovia emeryi]	80699	24346	36175	77769	93698	28677	104985	90572	90959	98968	34906	34703	92003	27069	31269
CrematogasterSubCLCMeta_rep_c1528	ref|XP_011699370.1| PREDICTED: DNA topoisomerase I, mitochondrial isoform X1 [Wasmannia auropunctata]	2012	1386	2957	3296	3797	5194	2912	1562	2473	3745	3948	2018	3012	2268	1962
CrematogasterSubCLCMeta_rep_c1529	ref|XP_011689259.1| PREDICTED: uncharacterized protein LOC105450868 isoform X2 [Wasmannia auropunctata]	217	2074	2850	465	597	2614	281	301	200	35	486	2060	389	2096	2283
CrematogasterSubCLCMeta_rep_c1530	#N/A	128	107	44	99	143	156	97	51	134	143	539	158	243	113	106
CrematogasterSubCLCMeta_rep_c1531	ref|XP_011878753.1| PREDICTED: segmentation protein cap'n'collar-like isoform X3 [Vollenhovia emeryi]	1307	328	730	870	733	742	508	637	663	1197	1504	856	668	736	544
CrematogasterSubCLCMeta_rep_c1532	ref|XP_011698017.1| PREDICTED: tyrosine 3-monooxygenase [Wasmannia auropunctata]	934	68	23	190	259	102	228	2795	1498	808	22575	13	2822	30	99
CrematogasterSubCLCMeta_rep_c1533	ref|XP_011871364.1| PREDICTED: huntingtin-interacting protein 1 [Vollenhovia emeryi]	2386	2104	975	2257	1203	5873	3140	1618	1976	2196	981	2324	1076	1383	1315
CrematogasterSubCLCMeta_rep_c1534	ref|XP_018366994.1| PREDICTED: glutathione S-transferase-like [Trachymyrmex cornetzi]	86	224	181	70	119	92	92	55	173	1	122	179	40	82	797
CrematogasterSubCLCMeta_rep_c1535	ref|XP_011057875.1| PREDICTED: uncharacterized protein LOC105148074 isoform X1 [Acromyrmex echinatior]	15	93	19	1	246	211	278	27	346	19	211	166	16	18	223
CrematogasterSubCLCMeta_rep_c1536	ref|XP_011161806.1| PREDICTED: centrosomin isoform X1 [Solenopsis invicta]	583	856	652	460	603	2161	686	782	999	756	671	726	490	1082	593
CrematogasterSubCLCMeta_rep_c1537	ref|XP_011874781.1| PREDICTED: uncharacterized protein LOC105565854 isoform X1 [Vollenhovia emeryi]	783	830	521	740	891	959	822	443	933	584	1055	778	769	763	920
CrematogasterSubCLCMeta_rep_c1538	ref|XP_011155431.1| PREDICTED: probable elongator complex protein 2 [Solenopsis invicta]	31	184	350	0	20	291	275	0	167	0	180	248	45	128	170
CrematogasterSubCLCMeta_rep_c1539	ref|XP_011881391.1| PREDICTED: GATA-binding factor C-like [Vollenhovia emeryi]	47	155	108	256	212	330	193	102	220	306	186	108	79	161	208
CrematogasterSubCLCMeta_rep_c1540	ref|XP_011873886.1| PREDICTED: cytochrome P450 9e2-like [Vollenhovia emeryi]	265	269	84	99	1465	0	213	417	183	101	83	144	1273	108	172
CrematogasterSubCLCMeta_rep_c1541	ref|XP_018301488.1| PREDICTED: probable sodium/potassium/calcium exchanger CG1090 [Trachymyrmex zeteki]	766	569	784	577	775	907	1073	759	1093	774	596	813	836	739	974
CrematogasterSubCLCMeta_rep_c1542	ref|XP_013080626.1| PREDICTED: epoxide hydrolase 4-like [Biomphalaria glabrata]	40	162	16	13	217	241	519	18	451	5	508	183	27	7	207
CrematogasterSubCLCMeta_rep_c1543	ref|XP_011862839.1| PREDICTED: uncharacterized protein LOC105559280 isoform X1 [Vollenhovia emeryi]	36	61	106	46	39	139	64	48	43	73	79	50	70	29	128
CrematogasterSubCLCMeta_rep_c1544	ref|XP_011703695.1| PREDICTED: paired amphipathic helix protein Sin3b isoform X1 [Wasmannia auropunctata]	187	1613	2665	332	401	1560	393	249	366	374	421	2006	264	874	1683
CrematogasterSubCLCMeta_rep_c1545	ref|XP_011156817.1| PREDICTED: glutamate-gated chloride channel isoform X5 [Solenopsis invicta]	69	311	106	283	246	462	358	62	419	58	436	186	171	167	324
CrematogasterSubCLCMeta_rep_c1546	ref|XP_013393116.1| PREDICTED: protein dachsous-like [Lingula anatina]	44	64	26	112	22	52	37	46	65	82	92	16	40	46	60
CrematogasterSubCLCMeta_rep_c1547	ref|XP_012526402.1| PREDICTED: RNA-binding protein 25 isoform X2 [Monomorium pharaonis]	188	285	275	208	445	413	260	172	439	135	248	268	235	215	365
CrematogasterSubCLCMeta_c1548	ref|XP_011160731.1| PREDICTED: fat-like cadherin-related tumor suppressor homolog isoform X1 [Solenopsis invicta]	138	146	218	245	112	230	244	156	248	101	158	52	99	158	203
CrematogasterSubCLCMeta_rep_c1549	ref|XP_018404898.1| PREDICTED: scavenger receptor class B member 1 [Cyphomyrmex costatus]	621	432	135	1484	317	19	478	733	252	772	2	97	321	247	320
CrematogasterSubCLCMeta_rep_c1550	ref|XP_012525841.1| PREDICTED: estradiol 17-beta-dehydrogenase 8-like [Monomorium pharaonis]	801	659	748	762	847	918	783	1073	626	445	597	659	614	572	748
CrematogasterSubCLCMeta_rep_c1551	ref|XP_018339783.1| PREDICTED: nuclear export mediator factor NEMF homolog [Trachymyrmex septentrionalis]	438	242	503	227	365	314	352	278	309	286	1040	498	589	400	461
CrematogasterSubCLCMeta_rep_c1552	ref|XP_018351899.1| PREDICTED: transcriptional activator protein Pur-beta isoform X2 [Trachymyrmex septentrionalis]	559	548	497	311	590	967	752	591	701	494	1086	505	507	592	613
CrematogasterSubCLCMeta_rep_c1553	ref|XP_018400579.1| PREDICTED: desumoylating isopeptidase 2 isoform X1 [Cyphomyrmex costatus]	449	442	436	472	442	538	467	512	539	382	726	485	574	416	447
CrematogasterSubCLCMeta_rep_c1554	ref|XP_020723050.1| X-ray repair cross-complementing protein 5 [Bombus terrestris]	39	86	20	116	142	51	248	29	161	0	230	59	20	32	144
CrematogasterSubCLCMeta_rep_c1555	ref|XP_011882068.1| PREDICTED: cytochrome P450 4C1-like [Vollenhovia emeryi]	494	1030	427	1219	786	79	108	2658	326	3032	22	679	2181	843	773
CrematogasterSubCLCMeta_rep_c1556	ref|XP_018337292.1| PREDICTED: adenylate cyclase type 2 isoform X1 [Trachymyrmex septentrionalis]	429	330	326	248	504	419	499	237	368	334	596	419	323	401	150
CrematogasterSubCLCMeta_rep_c1557	ref|XP_011700478.1| PREDICTED: uncharacterized protein LOC105457487 [Wasmannia auropunctata]	0	634	470	18	249	163	299	69	381	0	439	548	83	16	790
CrematogasterSubCLCMeta_rep_c1558	ref|XP_011645570.1| PREDICTED: dynactin subunit 1 isoform X4 [Pogonomyrmex barbatus]	1728	1098	2117	1319	2505	1297	2651	900	1028	1503	2833	1479	2376	750	1272
CrematogasterSubCLCMeta_rep_c1559	ref|XP_011881535.1| PREDICTED: endoribonuclease Dcr-1 [Vollenhovia emeryi]	550	565	596	491	660	387	834	384	634	425	797	536	479	406	614
CrematogasterSubCLCMeta_rep_c1560	ref|XP_015185985.1| PREDICTED: uncharacterized protein LOC107071468 [Polistes dominula]	70	15	97	52	44	34	62	30	90	21	78	18	90	44	82
CrematogasterSubCLCMeta_rep_c1561	ref|XP_011051568.1| PREDICTED: zinc finger protein 543-like isoform X1 [Acromyrmex echinatior]	277	280	137	164	333	238	318	99	305	173	277	243	265	81	276
CrematogasterSubCLCMeta_rep_c1562	ref|XP_011636949.1| PREDICTED: moesin/ezrin/radixin homolog 1 isoform X1 [Pogonomyrmex barbatus]	1812	905	1424	1131	1306	3867	1356	1189	933	897	2454	1606	2670	1135	867
CrematogasterSubCLCMeta_rep_c1563	ref|XP_018338040.1| PREDICTED: kinase D-interacting substrate of 220 kDa isoform X1 [Trachymyrmex septentrionalis]	178	183	356	140	228	261	270	144	219	65	906	210	400	309	488
CrematogasterSubCLCMeta_rep_c1564	ref|XP_018347711.1| PREDICTED: caspase-8 [Trachymyrmex septentrionalis]	275	270	429	312	387	448	297	279	351	321	519	401	385	336	433
CrematogasterSubCLCMeta_rep_c1565	ref|XP_011863526.1| PREDICTED: chaoptin isoform X1 [Vollenhovia emeryi]	7342	4382	13221	12443	8123	4935	9384	5124	5958	8784	5056	7801	4414	8201	7619
CrematogasterSubCLCMeta_rep_c1566	#N/A	51	124	217	145	227	557	130	103	173	203	1311	142	308	371	305
CrematogasterSubCLCMeta_rep_c1567	ref|XP_011685381.1| PREDICTED: ankyrin repeat and KH domain-containing protein mask-like [Wasmannia auropunctata]	108	256	83	306	220	173	245	73	139	97	546	617	111	292	586
CrematogasterSubCLCMeta_rep_c1568	ref|XP_011860740.1| PREDICTED: maestro heat-like repeat-containing protein family member 1 [Vollenhovia emeryi]	210	168	318	178	205	852	211	206	198	164	151	213	247	359	207
CrematogasterSubCLCMeta_rep_c1569	ref|XP_011689738.1| PREDICTED: uncharacterized protein LOC105451157 [Wasmannia auropunctata]	111	66	58	66	103	181	145	60	89	116	171	60	371	68	99
CrematogasterSubCLCMeta_rep_c1570	ref|XP_011162757.1| PREDICTED: serine/threonine-protein kinase VRK1-like [Solenopsis invicta]	180	281	261	128	220	212	274	216	196	129	340	285	178	48	287
CrematogasterSubCLCMeta_rep_c1571	ref|XP_018373625.1| PREDICTED: uncharacterized protein LOC108767969 [Trachymyrmex cornetzi]	513	14	0	426	455	114	483	153	179	36	111	0	307	101	32
CrematogasterSubCLCMeta_rep_c1572	ref|XP_018353849.1| PREDICTED: enhancer of filamentation 1 [Trachymyrmex septentrionalis]	646	987	1244	971	991	1080	665	519	988	743	1078	950	1176	512	836
CrematogasterSubCLCMeta_rep_c1573	ref|XP_011256122.1| PREDICTED: fatty acid synthase [Camponotus floridanus]	0	0	65	72	74	28	98	60	32	58	50	67	46	116	51
CrematogasterSubCLCMeta_rep_c1574	ref|XP_011159961.1| PREDICTED: 1-acyl-sn-glycerol-3-phosphate acyltransferase alpha [Solenopsis invicta]	696	570	796	1107	851	283	781	996	945	1074	597	676	1432	435	740
CrematogasterSubCLCMeta_rep_c1575	ref|XP_011686657.1| PREDICTED: Fanconi anemia group I protein [Wasmannia auropunctata]	1913	990	2057	2025	2040	1455	2166	1472	2040	1655	2577	1328	2682	1291	1702
CrematogasterSubCLCMeta_rep_c1576	ref|XP_011051670.1| PREDICTED: nuclear factor NF-kappa-B p110 subunit isoform X1 [Acromyrmex echinatior]	1346	631	1296	742	935	1288	1098	797	1232	1107	3214	1103	815	1408	2260
CrematogasterSubCLCMeta_rep_c1577	ref|XP_011694347.1| PREDICTED: uncharacterized protein LOC105453826 isoform X1 [Wasmannia auropunctata]	66	126	192	60	32	105	14	9	57	24	24	120	63	195	167
CrematogasterSubCLCMeta_rep_c1578	ref|XP_018045280.1| PREDICTED: methionine aminopeptidase 1 [Atta colombica]	188	101	262	241	245	402	171	201	284	307	405	307	234	248	308
CrematogasterSubCLCMeta_rep_c1579	ref|XP_011876250.1| PREDICTED: synapse-associated protein of 47 kDa-like isoform X2 [Vollenhovia emeryi]	33	97	18	45	14	1735	46	23	18	11	14	126	64	67	191
CrematogasterSubCLCMeta_rep_c1580	ref|XP_011646328.1| PREDICTED: synapse-associated protein of 47 kDa isoform X2 [Pogonomyrmex barbatus]	187	1184	172	564	527	190	469	286	457	196	473	1206	368	712	2391
CrematogasterSubCLCMeta_rep_c1581	ref|XP_018301506.1| PREDICTED: uncharacterized protein LOC108721455 [Trachymyrmex zeteki]	32	13	22	20	2	27	12	11	35	1	32	22	54	24	5
CrematogasterSubCLCMeta_c1582	ref|XP_018303107.1| PREDICTED: zinc finger protein castor homolog 1-like isoform X1 [Trachymyrmex zeteki]	76	136	92	21	137	178	210	52	135	0	159	66	310	57	108
CrematogasterSubCLCMeta_rep_c1583	ref|XP_018053521.1| PREDICTED: furin-like protease 1 isoform X2 [Atta colombica]	175	356	52	275	277	229	309	235	238	95	626	175	163	70	58
CrematogasterSubCLCMeta_rep_c1584	ref|XP_018302957.1| PREDICTED: zinc finger protein 2-like [Trachymyrmex zeteki]	2778	2529	3308	3134	2828	3916	2787	2420	3727	2605	3668	2805	3170	4625	3634
CrematogasterSubCLCMeta_c1585	ref|XP_011870227.1| PREDICTED: calexcitin-2 isoform X1 [Vollenhovia emeryi]	0	186	0	10	91	71	147	0	148	0	80	36	13	1	172
CrematogasterSubCLCMeta_c1586	ref|XP_011155743.1| PREDICTED: solute carrier family 35 member E2-like [Solenopsis invicta]	357	959	1798	1242	1139	937	2006	1670	965	830	1201	1277	847	1037	1313
CrematogasterSubCLCMeta_rep_c1587	ref|XP_011691084.1| PREDICTED: zinc finger protein 880-like isoform X3 [Wasmannia auropunctata]	2013	752	1367	1272	1558	2445	993	1572	1574	1163	2869	1345	1461	1227	947
CrematogasterSubCLCMeta_rep_c1588	ref|XP_012532517.1| PREDICTED: uncharacterized protein LOC105834522, partial [Monomorium pharaonis]	150	407	106	205	523	522	518	122	560	80	551	400	127	154	548
CrematogasterSubCLCMeta_rep_c1589	ref|XP_011878937.1| PREDICTED: gastrin-releasing peptide receptor [Vollenhovia emeryi]	139	117	218	29	365	222	157	156	351	97	257	433	299	48	178
CrematogasterSubCLCMeta_rep_c1590	ref|XP_011705370.1| PREDICTED: phosphatidylinositol 5-phosphate 4-kinase type-2 alpha isoform X2 [Wasmannia auropunctata]	0	89	0	0	0	748	0	0	0	60	0	69	1	31	7
CrematogasterSubCLCMeta_rep_c1591	ref|XP_022188087.1| uncharacterized protein LOC111046770 [Nilaparvata lugens]	1077	29	42	821	279	341	941	42	29	46	10	79	34	6725	34
CrematogasterSubCLCMeta_rep_c1592	ref|XP_018397981.1| PREDICTED: myelin regulatory factor [Cyphomyrmex costatus]	168	75	330	37	102	156	94	91	158	81	183	79	112	25	153
CrematogasterSubCLCMeta_rep_c1593	ref|XP_011703906.1| PREDICTED: protein suppressor 2 of zeste-like [Wasmannia auropunctata]	148	416	278	218	316	251	401	255	364	262	622	268	415	256	414
CrematogasterSubCLCMeta_rep_c1594	ref|XP_011864185.1| PREDICTED: uncharacterized protein LOC105560048 isoform X1 [Vollenhovia emeryi]	374	655	1031	580	976	1083	1742	1471	1623	604	823	1231	1604	293	1045
CrematogasterSubCLCMeta_rep_c1595	ref|XP_018347189.1| PREDICTED: uncharacterized protein LOC108751466 [Trachymyrmex septentrionalis]	183	521	524	309	109	351	143	140	105	1	169	462	183	468	446
CrematogasterSubCLCMeta_c1596	ref|XP_011634896.1| PREDICTED: dual specificity tyrosine-phosphorylation-regulated kinase 2, partial [Pogonomyrmex barbatus]	57	55	67	92	51	204	82	91	82	49	84	54	46	177	110
CrematogasterSubCLCMeta_rep_c1597	ref|XP_011876154.1| PREDICTED: transketolase-like protein 2 isoform X1 [Vollenhovia emeryi]	2663	1763	2674	694	1646	6351	574	3189	2389	665	501	1406	4828	992	902
CrematogasterSubCLCMeta_rep_c1598	ref|XP_011689472.1| PREDICTED: ribosomal biogenesis protein LAS1L [Wasmannia auropunctata]	1393	1027	1460	1318	1566	786	1265	1236	1318	1354	1560	1481	912	1458	1368
CrematogasterSubCLCMeta_rep_c1599	ref|XP_018313683.1| PREDICTED: major facilitator superfamily domain-containing protein 6 isoform X1 [Trachymyrmex zeteki]	110	324	158	110	98	920	133	114	121	56	44	235	56	201	331
CrematogasterSubCLCMeta_rep_c1600	ref|XP_011865236.1| PREDICTED: vacuolar protein sorting-associated protein 13A-like isoform X2 [Vollenhovia emeryi]	282	187	242	165	397	307	360	68	353	116	299	195	78	104	323
CrematogasterSubCLCMeta_rep_c1601	ref|XP_011859931.1| PREDICTED: X-ray repair cross-complementing protein 5-like [Vollenhovia emeryi]	1482	825	1173	1331	1229	1397	1321	1055	1326	1056	1016	1396	1083	957	1265
CrematogasterSubCLCMeta_rep_c1602	ref|XP_018359113.1| PREDICTED: la-related protein CG11505 isoform X2 [Trachymyrmex cornetzi]	1053	930	1156	1460	940	2263	838	1508	1041	913	3460	1210	1250	1520	1780
CrematogasterSubCLCMeta_rep_c1603	ref|XP_018370825.1| PREDICTED: cysteine-rich secretory protein 1-like [Trachymyrmex cornetzi]	0	46	0	0	26	0	204	0	119	0	96	2	462	0	63
CrematogasterSubCLCMeta_rep_c1604	ref|XP_011696726.1| PREDICTED: uncharacterized protein LOC105455242 [Wasmannia auropunctata]	60	92	170	72	59	226	52	31	84	20	385	57	49	56	88
CrematogasterSubCLCMeta_rep_c1605	ref|XP_011871533.1| PREDICTED: uncharacterized protein LOC105564050 [Vollenhovia emeryi]	122	113	255	150	181	225	132	96	166	133	173	124	155	157	193
CrematogasterSubCLCMeta_rep_c1606	ref|XP_011869257.1| PREDICTED: uncharacterized protein LOC105562793 [Vollenhovia emeryi]	41	0	19	4	14	2759	26	198	126	0	109	16	204	0	0
CrematogasterSubCLCMeta_rep_c1607	ref|XP_011864649.1| PREDICTED: uncharacterized protein LOC105560286 [Vollenhovia emeryi]	353	400	591	523	496	813	883	596	877	164	1267	715	738	530	1808
CrematogasterSubCLCMeta_rep_c1608	ref|XP_012234093.1| PREDICTED: CHRNA7-FAM7A fusion protein-like isoform X2 [Linepithema humile]	0	132	6	0	104	131	222	4	212	0	194	41	4	0	147
CrematogasterSubCLCMeta_rep_c1609	ref|XP_011874526.1| PREDICTED: uncharacterized protein LOC105565717 [Vollenhovia emeryi]	102	214	114	322	298	254	675	178	497	175	443	307	120	276	343
CrematogasterSubCLCMeta_rep_c1610	ref|XP_018360348.1| PREDICTED: protein toll [Trachymyrmex cornetzi]	1898	195	685	1759	413	692	912	944	572	590	391	535	1508	414	550
CrematogasterSubCLCMeta_rep_c1611	ref|XP_018360051.1| PREDICTED: sarcolemmal membrane-associated protein [Trachymyrmex cornetzi]	3446	2982	3552	3693	3427	3131	3393	2852	3182	3568	3999	3359	3181	3223	3564
CrematogasterSubCLCMeta_rep_c1612	ref|XP_014468626.1| PREDICTED: glycoprotein 3-alpha-L-fucosyltransferase A isoform X3 [Dinoponera quadriceps]	112	387	565	167	597	792	505	163	632	162	297	783	346	53	420
CrematogasterSubCLCMeta_rep_c1613	ref|XP_011629878.1| PREDICTED: dehydrogenase/reductase SDR family member 11-like [Pogonomyrmex barbatus]	2087	651	866	1371	556	225	1250	1561	2094	989	500	1135	1119	770	1506
CrematogasterSubCLCMeta_rep_c1614	ref|XP_012543672.1| PREDICTED: phosphatidylinositol-glycan biosynthesis class W protein-like [Monomorium pharaonis]	113	81	191	67	208	355	22	36	116	50	208	71	120	0	8
CrematogasterSubCLCMeta_rep_c1615	ref|XP_011693456.1| PREDICTED: phosphatidylinositol-glycan biosynthesis class W protein [Wasmannia auropunctata]	393	271	404	202	241	351	356	280	267	305	452	318	369	450	478
CrematogasterSubCLCMeta_rep_c1616	ref|XP_014476749.1| PREDICTED: uncharacterized protein LOC106745560, partial [Dinoponera quadriceps]	19	25	109	64	49	87	45	63	98	26	66	43	44	75	149
CrematogasterSubCLCMeta_rep_c1617	ref|XP_018402223.1| PREDICTED: adenylosuccinate lyase [Cyphomyrmex costatus]	2601	5032	1636	2220	157	331	1920	1096	2395	1508	1873	565	1743	2182	602
CrematogasterSubCLCMeta_rep_c1618	ref|XP_011883349.1| PREDICTED: uncharacterized protein LOC105570618 isoform X2 [Vollenhovia emeryi]	201	183	162	160	510	101	140	246	234	223	1852	129	712	297	150
CrematogasterSubCLCMeta_rep_c1619	ref|XP_012538586.1| PREDICTED: sodium/calcium exchanger 2 isoform X2 [Monomorium pharaonis]	134	198	153	246	164	303	123	104	138	140	138	176	178	344	216
CrematogasterSubCLCMeta_rep_c1620	ref|XP_011871068.1| PREDICTED: inactive dipeptidyl peptidase 10 isoform X2 [Vollenhovia emeryi]	467	487	522	743	960	586	1052	487	1024	622	379	1289	582	1202	563
CrematogasterSubCLCMeta_rep_c1621	#N/A	168	0	38	179	209	85	231	71	191	205	38	28	87	0	6
CrematogasterSubCLCMeta_rep_c1622	ref|XP_011686739.1| PREDICTED: monocarboxylate transporter 3 isoform X2 [Wasmannia auropunctata]	635	520	859	798	1904	798	1724	704	1685	1400	1246	1744	2360	698	409
CrematogasterSubCLCMeta_rep_c1623	ref|XP_011695492.1| PREDICTED: MATH and LRR domain-containing protein PFE0570w [Wasmannia auropunctata]	268	182	181	166	245	359	308	166	316	276	283	153	400	171	110
CrematogasterSubCLCMeta_rep_c1624	ref|XP_018304892.1| PREDICTED: DNA replication ATP-dependent helicase/nuclease DNA2 [Trachymyrmex zeteki]	633	295	525	540	476	431	492	413	361	283	1249	474	601	402	427
CrematogasterSubCLCMeta_rep_c1625	ref|XP_011633532.1| PREDICTED: dedicator of cytokinesis protein 3 isoform X2 [Pogonomyrmex barbatus]	187	135	264	375	140	366	323	170	244	99	836	377	415	267	353
CrematogasterSubCLCMeta_rep_c1626	ref|XP_018346566.1| PREDICTED: importin subunit beta-1 isoform X3 [Trachymyrmex septentrionalis]	1632	1851	1951	1775	1750	2116	1747	1463	1927	1369	3806	1366	2189	1606	2109
CrematogasterSubCLCMeta_rep_c1627	ref|XP_011348332.1| PREDICTED: glycerol-3-phosphate dehydrogenase [NAD(+)], cytoplasmic isoform X1 [Ooceraea biroi]	256	202	240	146	173	99	184	136	197	258	146	365	144	218	208
CrematogasterSubCLCMeta_rep_c1628	ref|XP_018347653.1| PREDICTED: voltage-dependent T-type calcium channel subunit alpha-1G [Trachymyrmex septentrionalis]	71	312	782	167	593	1007	439	266	504	73	268	214	112	30	253
CrematogasterSubCLCMeta_rep_c1629	ref|XP_012526665.1| PREDICTED: transmembrane protein 8A-like isoform X3 [Monomorium pharaonis]	433	366	615	423	506	758	356	267	437	339	598	324	322	569	490
CrematogasterSubCLCMeta_rep_c1630	ref|XP_018370991.1| PREDICTED: uncharacterized protein LOC108766295 [Trachymyrmex cornetzi]	146	65	166	188	98	48	277	157	154	337	128	109	193	38	176
CrematogasterSubCLCMeta_rep_c1631	ref|XP_018312032.1| PREDICTED: protein THEM6 [Trachymyrmex zeteki]	373	228	343	283	220	177	294	171	323	71	563	261	385	443	292
CrematogasterSubCLCMeta_rep_c1632	ref|XP_018396678.1| PREDICTED: protein aubergine-like [Cyphomyrmex costatus]	665	512	698	550	840	452	781	530	815	390	1133	555	1823	723	649
CrematogasterSubCLCMeta_rep_c1633	ref|XP_011685036.1| PREDICTED: uncharacterized protein LOC105448249 [Wasmannia auropunctata]	292	368	74	358	430	650	520	446	608	303	1924	332	473	135	399
CrematogasterSubCLCMeta_rep_c1634	#N/A	0	27	11	6	53	24	33	10	80	0	37	26	39	1	52
CrematogasterSubCLCMeta_rep_c1635	ref|XP_011861676.1| PREDICTED: centrosomal protein of 162 kDa isoform X2 [Vollenhovia emeryi]	17	66	122	45	83	172	98	65	127	274	138	100	96	127	134
CrematogasterSubCLCMeta_rep_c1636	ref|XP_011694291.1| PREDICTED: cullin-5 [Wasmannia auropunctata]	3058	2316	2646	2566	2557	2931	2485	2520	2562	2572	3785	2589	3030	2629	2813
CrematogasterSubCLCMeta_rep_c1637	ref|XP_018302151.1| PREDICTED: membrane metallo-endopeptidase-like 1 [Trachymyrmex zeteki]	225	174	323	278	154	997	319	234	238	135	45	322	413	655	377
CrematogasterSubCLCMeta_rep_c1638	ref|XP_011687970.1| PREDICTED: uncharacterized protein LOC105450057 isoform X2 [Wasmannia auropunctata]	13	57	8	3	16	20	22	16	27	0	0	11	17	23	31
CrematogasterSubCLCMeta_rep_c1639	ref|XP_011688371.1| PREDICTED: C-terminal-binding protein isoform X3 [Wasmannia auropunctata]	612	624	896	595	731	1160	713	647	893	548	866	515	937	614	1063
CrematogasterSubCLCMeta_rep_c1640	ref|XP_018345963.1| PREDICTED: homeobox protein prospero-like isoform X4 [Trachymyrmex septentrionalis]	238	478	1530	85	1016	1641	1013	938	1217	326	985	995	1275	463	1027
CrematogasterSubCLCMeta_rep_c1641	ref|XP_012540423.1| PREDICTED: transcriptional adapter 2B isoform X1 [Monomorium pharaonis]	71	418	706	175	265	425	318	58	107	0	125	502	283	313	488
CrematogasterSubCLCMeta_rep_c1642	ref|XP_018398208.1| PREDICTED: uncharacterized protein LOC108776176 [Cyphomyrmex costatus]	136	64	173	236	239	194	322	107	340	97	650	94	721	106	216
CrematogasterSubCLCMeta_rep_c1643	ref|XP_018055999.1| PREDICTED: LOW QUALITY PROTEIN: protein kinase 4 [Atta colombica]	50	141	88	74	110	151	117	70	274	39	231	138	136	56	125
CrematogasterSubCLCMeta_rep_c1644	ref|XP_011165305.1| PREDICTED: nucleoporin NUP188 homolog [Solenopsis invicta]	793	839	1012	868	827	953	836	681	906	711	1692	888	1066	911	1015
CrematogasterSubCLCMeta_rep_c1645	ref|XP_011870028.1| PREDICTED: group XIIA secretory phospholipase A2 [Vollenhovia emeryi]	2163	1715	1564	2377	1981	1912	1935	1786	1747	2223	2674	3069	1773	2084	1978
CrematogasterSubCLCMeta_rep_c1646	ref|XP_011877116.1| PREDICTED: nuclear pore complex protein Nup153 [Vollenhovia emeryi]	220	35	108	188	212	580	101	67	62	323	844	0	317	0	0
CrematogasterSubCLCMeta_rep_c1647	ref|XP_011876722.1| PREDICTED: eye-specific diacylglycerol kinase isoform X1 [Vollenhovia emeryi]	89	196	32	177	116	328	257	61	265	40	377	125	284	92	179
CrematogasterSubCLCMeta_rep_c1648	ref|XP_011860398.1| PREDICTED: Bardet-Biedl syndrome 4 protein homolog isoform X2 [Vollenhovia emeryi]	98	72	154	42	57	76	60	54	116	80	55	121	97	108	186
CrematogasterSubCLCMeta_rep_c1649	ref|XP_011875651.1| PREDICTED: VWFA and cache domain-containing protein 1 [Vollenhovia emeryi]	1026	626	1115	1090	803	784	886	666	919	882	992	1106	1157	891	916
CrematogasterSubCLCMeta_rep_c1650	ref|XP_018366179.1| PREDICTED: protein msta-like [Trachymyrmex cornetzi]	16	95	141	24	25	83	28	53	29	89	69	101	96	72	53
CrematogasterSubCLCMeta_rep_c1651	ref|XP_018055185.1| PREDICTED: serine/threonine-protein kinase OSR1-like [Atta colombica]	878	589	491	875	730	458	778	903	728	452	1410	460	809	550	518
CrematogasterSubCLCMeta_rep_c1652	ref|XP_011638785.1| PREDICTED: cytochrome P450 4C1-like [Pogonomyrmex barbatus]	1008	152	37	90	247	143	664	285	60	222	1	59	105	550	3
CrematogasterSubCLCMeta_rep_c1653	ref|XP_011868089.1| PREDICTED: dipeptidase 1 [Vollenhovia emeryi]	68	115	197	257	210	546	277	86	364	51	210	191	58	126	304
CrematogasterSubCLCMeta_rep_c1654	ref|XP_018372621.1| PREDICTED: leucine-rich repeat-containing protein 57 [Trachymyrmex cornetzi]	324	111	186	318	285	214	387	294	327	146	620	283	225	149	198
CrematogasterSubCLCMeta_rep_c1655	ref|XP_011881584.1| PREDICTED: uncharacterized protein LOC105569601 [Vollenhovia emeryi]	3039	1291	2547	2464	4776	3519	3742	4077	3785	2268	1112	2642	5166	812	1636
CrematogasterSubCLCMeta_rep_c1656	ref|XP_011066360.1| PREDICTED: multidrug resistance-associated protein 4-like isoform X1 [Acromyrmex echinatior]	418	262	225	799	619	1609	335	433	638	180	676	272	482	556	217
CrematogasterSubCLCMeta_rep_c1657	ref|XP_018316038.1| PREDICTED: growth/differentiation factor 8 [Trachymyrmex zeteki]	407	433	356	305	147	294	540	297	269	386	704	236	175	112	176
CrematogasterSubCLCMeta_rep_c1658	ref|XP_011876085.1| PREDICTED: uncharacterized protein LOC105566579 isoform X2 [Vollenhovia emeryi]	235	0	3	652	20	523	277	398	261	633	283	0	469	3	3
CrematogasterSubCLCMeta_rep_c1659	ref|XP_018050619.1| PREDICTED: probable nuclear hormone receptor HR3 isoform X5 [Atta colombica]	60	216	6	43	135	152	178	26	179	0	251	73	27	73	146
CrematogasterSubCLCMeta_rep_c1660	#N/A	122	96	271	301	136	20	73	143	249	347	110	136	106	112	105
CrematogasterSubCLCMeta_rep_c1661	ref|XP_012233277.1| PREDICTED: CCR4-NOT transcription complex subunit 6-like isoform X1 [Linepithema humile]	138	463	247	187	325	303	309	202	352	291	453	260	217	122	411
CrematogasterSubCLCMeta_rep_c1662	ref|XP_012531334.1| PREDICTED: leucine-rich repeat protein soc-2 homolog [Monomorium pharaonis]	296	364	428	429	276	206	296	277	375	188	466	272	341	273	336
CrematogasterSubCLCMeta_c1663	ref|XP_011707930.1| PREDICTED: uncharacterized protein LOC105462763 isoform X3 [Wasmannia auropunctata]	26	30	0	45	31	68	43	38	27	20	62	44	70	8	16
CrematogasterSubCLCMeta_rep_c1664	ref|XP_012064162.1| PREDICTED: serine/threonine-protein phosphatase 6 regulatory ankyrin repeat subunit A-like [Atta cephalotes]	653	681	913	661	523	643	1031	502	690	578	1420	719	904	628	690
CrematogasterSubCLCMeta_rep_c1665	ref|XP_012061041.1| PREDICTED: uncharacterized protein LOC105624292 [Atta cephalotes]	400	295	248	235	458	320	428	248	467	76	535	308	260	122	443
CrematogasterSubCLCMeta_rep_c1666	ref|XP_012524161.1| PREDICTED: cilia- and flagella-associated protein 36 [Monomorium pharaonis]	807	889	888	460	869	843	1169	873	986	534	925	945	1255	689	1048
CrematogasterSubCLCMeta_rep_c1667	ref|XP_011862254.1| PREDICTED: ATP-dependent (S)-NAD(P)H-hydrate dehydratase isoform X1 [Vollenhovia emeryi]	849	429	773	641	785	1108	502	470	686	963	1073	903	691	774	765
CrematogasterSubCLCMeta_rep_c1668	ref|XP_018300147.1| PREDICTED: zinc finger protein 616-like isoform X2 [Trachymyrmex zeteki]	88	48	240	96	74	194	234	168	202	240	532	185	324	36	165
CrematogasterSubCLCMeta_rep_c1669	ref|XP_012531707.1| PREDICTED: charged multivesicular body protein 1b [Monomorium pharaonis]	0	27	0	0	0	585	0	0	0	0	0	0	0	0	0
CrematogasterSubCLCMeta_rep_c1670	ref|XP_011160110.1| PREDICTED: uncharacterized protein LOC105196077 [Solenopsis invicta]	144	63	29	191	85	140	56	79	155	150	128	104	112	45	106
CrematogasterSubCLCMeta_rep_c1671	ref|XP_011156380.1| PREDICTED: solute carrier family 2, facilitated glucose transporter member 1-like isoform X3 [Solenopsis invicta]	2612	2247	2005	5464	1495	1389	4017	3433	2029	1002	1276	3487	3589	4022	3178
CrematogasterSubCLCMeta_rep_c1672	ref|XP_011868729.1| PREDICTED: glycerophosphodiester phosphodiesterase domain-containing protein 1-like [Vollenhovia emeryi]	232	368	160	271	373	190	353	251	415	125	541	442	311	225	428
CrematogasterSubCLCMeta_c1673	ref|XP_011175085.1| PREDICTED: dehydrodolichyl diphosphate syntase complex subunit DHDDS-like [Solenopsis invicta]	186	190	20	15	217	27	246	10	31	0	28	8	29	202	150
CrematogasterSubCLCMeta_c1674	ref|XP_018313865.1| PREDICTED: uncharacterized protein LOC108729301 isoform X1 [Trachymyrmex zeteki]	329	202	513	343	418	719	607	345	480	345	685	369	506	301	340
CrematogasterSubCLCMeta_rep_c1675	ref|XP_011175493.1| PREDICTED: U3 small nucleolar RNA-associated protein 15 homolog [Solenopsis invicta]	1358	811	1382	1276	1355	1187	1132	1157	1055	1164	1760	1037	1474	1243	1236
CrematogasterSubCLCMeta_rep_c1676	ref|XP_011171709.1| PREDICTED: homeotic protein spalt-major-like [Solenopsis invicta]	511	571	853	620	848	1467	727	557	838	743	733	781	661	576	909
CrematogasterSubCLCMeta_rep_c1677	ref|XP_011878388.1| PREDICTED: SAM and SH3 domain-containing protein 1-like isoform X2 [Vollenhovia emeryi]	291	375	319	251	461	167	373	214	327	286	507	365	396	158	409
CrematogasterSubCLCMeta_rep_c1678	ref|XP_011068583.1| PREDICTED: tripeptidyl-peptidase 2 isoform X4 [Acromyrmex echinatior]	832	354	750	843	659	496	131	553	467	807	771	394	630	182	935
CrematogasterSubCLCMeta_rep_c1679	ref|XP_011685880.1| PREDICTED: acyl-CoA synthetase short-chain family member 3, mitochondrial isoform X1 [Wasmannia auropunctata]	7916	5628	6503	18092	6413	9666	7964	10343	8474	9962	6064	7037	5188	7988	9145
CrematogasterSubCLCMeta_rep_c1680	ref|XP_011875141.1| PREDICTED: prostatic acid phosphatase-like [Vollenhovia emeryi]	1016	506	1774	1586	1022	6308	605	811	1382	3190	419	1378	299	297	1192
CrematogasterSubCLCMeta_rep_c1681	ref|XP_011883330.1| PREDICTED: NADPH--cytochrome P450 reductase isoform X1 [Vollenhovia emeryi]	3673	95	90	136	1332	804	13647	8128	13663	10644	39156	50	5624	253	140
CrematogasterSubCLCMeta_rep_c1682	ref|XP_012531884.1| PREDICTED: SRSF protein kinase 3 isoform X2 [Monomorium pharaonis]	1184	1386	1856	1303	1432	2037	1692	1139	1598	1352	1928	1428	1488	1485	1784
CrematogasterSubCLCMeta_rep_c1683	ref|XP_011871708.1| PREDICTED: tubby-related protein 4 [Vollenhovia emeryi]	104	363	92	242	294	1031	373	79	388	249	310	248	138	164	407
CrematogasterSubCLCMeta_c1684	ref|XP_011159908.1| PREDICTED: uncharacterized protein LOC105195956 [Solenopsis invicta]	12	60	32	36	35	112	115	24	148	0	102	49	8	33	126
CrematogasterSubCLCMeta_rep_c1685	ref|XP_018301735.1| PREDICTED: pleckstrin homology domain-containing family M member 2 [Trachymyrmex zeteki]	1707	1437	1263	740	1024	968	746	2330	1717	903	1659	1499	1530	1104	1579
CrematogasterSubCLCMeta_rep_c1686	ref|XP_011638001.1| PREDICTED: cytoplasmic protein NCK1 isoform X1 [Pogonomyrmex barbatus]	1071	0	288	781	993	1043	1044	637	995	1012	1488	0	1337	220	162
CrematogasterSubCLCMeta_c1687	ref|XP_011643181.1| PREDICTED: hemicentin-1-like isoform X6 [Pogonomyrmex barbatus]	15	75	19	35	79	163	69	8	139	0	155	42	9	12	69
CrematogasterSubCLCMeta_rep_c1688	ref|XP_018046971.1| PREDICTED: LOW QUALITY PROTEIN: zinc finger SWIM domain-containing protein 8, partial [Atta colombica]	396	414	365	324	295	370	473	379	841	223	805	220	526	412	463
CrematogasterSubCLCMeta_rep_c1689	ref|XP_012230754.1| PREDICTED: uncharacterized protein LOC105677028 [Linepithema humile]	201	181	108	93	193	381	169	87	137	51	183	73	122	72	137
CrematogasterSubCLCMeta_rep_c1690	ref|XP_011168855.1| PREDICTED: uncharacterized protein LOC105202162, partial [Solenopsis invicta]	36	413	486	78	17	96	125	52	49	71	142	302	71	175	1177
CrematogasterSubCLCMeta_rep_c1691	ref|XP_017754892.1| PREDICTED: uncharacterized protein LOC108547057 [Eufriesea mexicana]	47	317	73	275	42	2556	165	80	149	167	95	193	142	205	51
CrematogasterSubCLCMeta_rep_c1692	ref|XP_011697094.1| PREDICTED: heterogeneous nuclear ribonucleoprotein H2 isoform X2 [Wasmannia auropunctata]	935	965	1569	976	1046	1114	1046	876	767	1243	2236	1149	1080	723	1230
CrematogasterSubCLCMeta_rep_c1693	ref|XP_011064354.1| PREDICTED: bumetanide-sensitive sodium-(potassium)-chloride cotransporter [Acromyrmex echinatior]	1223	859	944	895	933	893	1169	749	1489	651	1822	1015	1256	977	956
CrematogasterSubCLCMeta_rep_c1694	ref|XP_011175340.1| PREDICTED: uncharacterized protein LOC105207517 [Solenopsis invicta]	695	502	685	843	799	523	572	453	612	1107	1031	828	747	889	1041
CrematogasterSubCLCMeta_rep_c1695	ref|XP_018057705.1| PREDICTED: GTP cyclohydrolase 1 [Atta colombica]	378	183	319	245	170	909	344	334	321	194	2644	186	128	124	223
CrematogasterSubCLCMeta_rep_c1696	ref|XP_011865539.1| PREDICTED: uncharacterized protein LOC105560764 isoform X1 [Vollenhovia emeryi]	309	314	332	277	282	513	291	172	296	225	389	270	378	476	314
CrematogasterSubCLCMeta_rep_c1697	ref|XP_018405222.1| PREDICTED: uncharacterized protein LOC108781667 [Cyphomyrmex costatus]	266	265	326	175	485	294	461	237	332	433	376	242	295	205	493
CrematogasterSubCLCMeta_rep_c1698	ref|XP_011702874.1| PREDICTED: uncharacterized protein LOC105458939 isoform X1 [Wasmannia auropunctata]	1431	1859	1691	1538	2581	3614	2387	1999	2898	2169	3341	1430	3009	1632	3132
CrematogasterSubCLCMeta_rep_c1699	ref|XP_018318258.1| PREDICTED: transmembrane GTPase Marf-like isoform X2 [Trachymyrmex zeteki]	44	0	0	0	63	1228	0	85	0	0	245	104	0	0	105
CrematogasterSubCLCMeta_rep_c1700	ref|XP_018318258.1| PREDICTED: transmembrane GTPase Marf-like isoform X2 [Trachymyrmex zeteki]	874	1167	1547	1984	894	685	1304	1129	1487	1055	473	1273	1442	1224	1071
CrematogasterSubCLCMeta_rep_c1701	ref|XP_018310006.1| PREDICTED: zinc finger CCCH domain-containing protein 13 isoform X1 [Trachymyrmex zeteki]	568	551	1018	803	911	679	704	1031	999	918	2027	589	969	479	1107
CrematogasterSubCLCMeta_rep_c1702	ref|XP_012532550.1| PREDICTED: tyrosine-protein phosphatase 10D isoform X4 [Monomorium pharaonis]	439	271	323	581	611	1211	414	297	614	361	1521	299	750	422	258
CrematogasterSubCLCMeta_rep_c1703	ref|XP_011867102.1| PREDICTED: uncharacterized threonine-rich GPI-anchored glycoprotein PJ4664.02-like [Vollenhovia emeryi]	169	192	201	219	292	245	254	103	266	117	729	262	208	134	189
CrematogasterSubCLCMeta_c1704	ref|XP_011640528.1| PREDICTED: protein SET isoform X1 [Pogonomyrmex barbatus]	140	124	83	90	204	92	284	331	207	14	413	144	378	177	156
CrematogasterSubCLCMeta_rep_c1705	#N/A	53	108	29	115	245	0	402	12	465	13	490	145	93	0	103
CrematogasterSubCLCMeta_rep_c1706	ref|XP_011881141.1| PREDICTED: transcription factor Adf-1-like [Vollenhovia emeryi]	17	101	201	0	8	124	8	9	13	0	116	143	22	116	105
CrematogasterSubCLCMeta_rep_c1707	ref|XP_011696779.1| PREDICTED: protein CNPPD1 [Wasmannia auropunctata]	488	162	270	461	630	241	467	619	636	167	268	245	311	760	137
CrematogasterSubCLCMeta_rep_c1708	ref|XP_012533582.1| PREDICTED: uncharacterized protein DDB_G0272530 isoform X2 [Monomorium pharaonis]	305	88	356	310	131	129	66	119	743	158	86	217	593	232	356
CrematogasterSubCLCMeta_rep_c1709	ref|XP_011866258.1| PREDICTED: ral GTPase-activating protein subunit beta isoform X5 [Vollenhovia emeryi]	385	72	121	305	556	456	240	413	359	274	602	48	546	39	89
CrematogasterSubCLCMeta_rep_c1710	ref|XP_011863394.1| PREDICTED: protein kinase C [Vollenhovia emeryi]	217	193	247	185	381	419	336	189	468	143	633	313	342	166	307
CrematogasterSubCLCMeta_rep_c1711	ref|XP_018047327.1| PREDICTED: uncharacterized protein LOC108686499 [Atta colombica]	159	213	259	135	312	314	274	165	249	246	135	209	303	332	350
CrematogasterSubCLCMeta_rep_c1712	ref|XP_011646000.1| PREDICTED: protein alan shepard [Pogonomyrmex barbatus]	359	0	20	132	573	125	275	139	547	69	24	35	33	0	84
CrematogasterSubCLCMeta_rep_c1713	ref|XP_012540416.1| PREDICTED: mucin-19-like [Monomorium pharaonis]	421	860	149	89	64	166	142	112	98	66	0	509	132	1524	459
CrematogasterSubCLCMeta_rep_c1714	ref|XP_018306377.1| PREDICTED: uncharacterized protein LOC108724481 [Trachymyrmex zeteki]	30	78	195	37	55	65	23	10	37	1	92	49	97	2	56
CrematogasterSubCLCMeta_rep_c1715	ref|XP_018378200.1| PREDICTED: putative nuclease HARBI1 [Trachymyrmex cornetzi]	710	861	736	574	653	394	747	743	857	815	945	853	734	575	763
CrematogasterSubCLCMeta_rep_c1716	ref|XP_011865216.1| PREDICTED: ATP-dependent RNA helicase DHX8 [Vollenhovia emeryi]	287	186	274	412	337	612	369	494	419	412	448	301	424	378	285
CrematogasterSubCLCMeta_rep_c1717	ref|XP_011176414.1| PREDICTED: echinoderm microtubule-associated protein-like 2 isoform X3 [Solenopsis invicta]	197	130	124	313	452	643	275	107	371	141	872	417	161	125	257
CrematogasterSubCLCMeta_rep_c1718	ref|XP_011703500.1| PREDICTED: putative tyrosine-protein kinase Wsck [Wasmannia auropunctata]	263	159	149	128	247	157	219	148	248	258	845	232	828	371	146
CrematogasterSubCLCMeta_rep_c1719	ref|XP_011860977.1| PREDICTED: dnaJ homolog subfamily C member 10-like isoform X1 [Vollenhovia emeryi]	69	151	123	292	102	589	188	162	142	95	109	177	174	312	206
CrematogasterSubCLCMeta_rep_c1720	ref|XP_018362938.1| PREDICTED: uncharacterized protein LOC108761087 isoform X2 [Trachymyrmex cornetzi]	42	735	972	205	244	617	279	164	337	69	319	1106	207	754	893
CrematogasterSubCLCMeta_rep_c1721	ref|XP_011067115.1| PREDICTED: leucine-rich repeat and immunoglobulin-like domain-containing nogo receptor-interacting protein 1 [Acromyrmex echinatior]	452	306	47	470	498	1021	813	443	671	384	793	528	390	49	362
CrematogasterSubCLCMeta_rep_c1722	ref|XP_011865274.1| PREDICTED: carbonic anhydrase-related protein 10 isoform X1 [Vollenhovia emeryi]	11	100	86	81	123	180	267	37	146	68	211	157	7	30	140
CrematogasterSubCLCMeta_rep_c1723	ref|XP_011875929.1| PREDICTED: DNA endonuclease RBBP8-like [Vollenhovia emeryi]	256	146	256	259	271	197	306	309	298	186	276	203	550	160	221
CrematogasterSubCLCMeta_rep_c1724	ref|XP_011634455.1| PREDICTED: proton-coupled folate transporter-like isoform X1 [Pogonomyrmex barbatus]	446	257	231	350	355	352	195	284	235	164	226	355	282	418	294
CrematogasterSubCLCMeta_rep_c1725	ref|XP_018311814.1| PREDICTED: mitogen-activated protein kinase kinase kinase 13 isoform X4 [Trachymyrmex zeteki]	140	737	740	178	67	880	83	158	125	99	203	466	88	348	474
CrematogasterSubCLCMeta_rep_c1726	ref|XP_011699511.1| PREDICTED: protein phosphatase 1 regulatory subunit 3B-A [Wasmannia auropunctata]	176	1874	959	328	100	14958	113	122	146	152	97	955	136	913	1227
CrematogasterSubCLCMeta_rep_c1727	ref|XP_011260558.1| PREDICTED: ecotropic viral integration site 5 ortholog isoform X4 [Camponotus floridanus]	89	81	63	37	159	55	191	58	101	54	100	119	127	0	114
CrematogasterSubCLCMeta_rep_c1728	ref|XP_011689621.1| PREDICTED: ecotropic viral integration site 5 ortholog isoform X1 [Wasmannia auropunctata]	99	195	302	192	189	491	325	129	415	0	392	16	258	110	257
CrematogasterSubCLCMeta_rep_c1729	#N/A	39	305	59	132	193	195	272	76	334	16	409	279	83	66	212
CrematogasterSubCLCMeta_rep_c1730	ref|XP_011060947.1| PREDICTED: glycerophosphocholine phosphodiesterase GPCPD1-like isoform X2 [Acromyrmex echinatior]	1586	2077	1144	1463	2555	1392	2011	2592	2782	2266	2517	1860	2987	2239	2743
CrematogasterSubCLCMeta_rep_c1731	ref|XP_011632240.1| PREDICTED: LIM and SH3 domain protein Lasp [Pogonomyrmex barbatus]	542	501	478	511	524	606	767	530	788	225	870	511	736	693	883
CrematogasterSubCLCMeta_rep_c1732	ref|XP_011632240.1| PREDICTED: LIM and SH3 domain protein Lasp [Pogonomyrmex barbatus]	1791	0	36	374	713	12	956	21	705	125	1133	37	407	30	43
CrematogasterSubCLCMeta_rep_c1733	ref|XP_012541525.1| PREDICTED: heat shock factor protein 1-like isoform X3 [Monomorium pharaonis]	1580	1664	1514	1866	1634	2421	1774	1137	2130	1734	2403	1851	1593	1556	2032
CrematogasterSubCLCMeta_rep_c1734	ref|XP_011052564.1| PREDICTED: homeotic protein female sterile-like isoform X1 [Acromyrmex echinatior]	1769	1484	1814	1786	2227	1277	1649	1399	1802	1159	2919	1705	1936	1131	2386
CrematogasterSubCLCMeta_rep_c1735	ref|XP_011862862.1| PREDICTED: puromycin-sensitive aminopeptidase isoform X1 [Vollenhovia emeryi]	4145	3937	5378	5917	3917	5094	3403	3647	4230	4942	4243	3753	4224	5457	5418
CrematogasterSubCLCMeta_rep_c1736	ref|XP_018365351.1| PREDICTED: uncharacterized protein LOC108762713 [Trachymyrmex cornetzi]	1205	2154	2127	2068	1970	5647	2565	1883	2379	2408	1576	1667	2515	2089	1360
CrematogasterSubCLCMeta_rep_c1737	ref|XP_018405090.1| PREDICTED: glucose-6-phosphate exchanger SLC37A2 isoform X1 [Cyphomyrmex costatus]	2307	2112	2252	2437	2301	3002	2753	2113	2373	2444	4709	2685	2747	2261	2430
CrematogasterSubCLCMeta_rep_c1738	ref|XP_018303280.1| PREDICTED: carboxylesterase 1E-like [Trachymyrmex zeteki]	590	421	529	651	1127	286	939	479	670	624	1908	449	532	409	429
CrematogasterSubCLCMeta_rep_c1739	ref|XP_011878137.1| PREDICTED: ets DNA-binding protein pokkuri [Vollenhovia emeryi]	338	148	584	539	227	145	12	14	709	84	42	82	180	124	220
CrematogasterSubCLCMeta_rep_c1740	#N/A	54	35	15	32	71	75	17	67	53	0	134	36	41	34	94
CrematogasterSubCLCMeta_rep_c1741	ref|XP_018059185.1| PREDICTED: G1/S-specific cyclin-D2 [Atta colombica]	290	270	431	289	303	439	156	206	181	310	215	365	349	358	474
CrematogasterSubCLCMeta_c1742	ref|XP_018060084.1| PREDICTED: bromodomain-containing protein 8-like isoform X2 [Atta colombica]	287	13	17	245	99	150	309	22	166	0	617	12	352	35	134
CrematogasterSubCLCMeta_rep_c1743	ref|XP_011872538.1| PREDICTED: low molecular weight phosphotyrosine protein phosphatase-like [Vollenhovia emeryi]	468	287	551	334	494	337	483	214	423	158	391	134	294	151	359
CrematogasterSubCLCMeta_rep_c1744	#N/A	143	307	495	143	193	323	176	130	173	286	191	291	150	504	272
CrematogasterSubCLCMeta_rep_c1745	ref|XP_011062981.1| PREDICTED: JNK-interacting protein 3 isoform X1 [Acromyrmex echinatior]	3119	3808	5260	1935	4019	4387	3408	2200	2284	1836	1874	3992	1411	2705	2582
CrematogasterSubCLCMeta_rep_c1746	ref|XP_011870785.1| PREDICTED: stAR-related lipid transfer protein 13 isoform X2 [Vollenhovia emeryi]	258	232	550	364	272	359	251	283	366	270	1409	359	590	673	327
CrematogasterSubCLCMeta_rep_c1747	ref|XP_011169769.1| PREDICTED: uncharacterized protein LOC105202788 isoform X3 [Solenopsis invicta]	349	557	686	722	549	6487	275	410	758	930	1397	628	1957	842	405
CrematogasterSubCLCMeta_rep_c1748	ref|XP_018057778.1| PREDICTED: basement membrane-specific heparan sulfate proteoglycan core protein isoform X10 [Atta colombica]	2901	3582	5602	1471	2537	1271	1425	2098	2261	1715	1134	3285	3380	1858	3916
CrematogasterSubCLCMeta_rep_c1749	ref|XP_018057776.1| PREDICTED: basement membrane-specific heparan sulfate proteoglycan core protein isoform X8 [Atta colombica]	294	1275	2522	640	352	676	364	519	781	123	404	755	902	1744	1270
CrematogasterSubCLCMeta_rep_c1750	ref|XP_011265177.1| PREDICTED: uncharacterized protein LOC105256709 [Camponotus floridanus]	44	31	72	28	41	0	93	81	77	57	54	80	60	16	49
CrematogasterSubCLCMeta_rep_c1751	ref|XP_011692251.1| PREDICTED: putative methyltransferase NSUN6 [Wasmannia auropunctata]	502	363	437	316	504	509	232	244	453	680	553	431	558	391	428
CrematogasterSubCLCMeta_rep_c1752	ref|XP_011696594.1| PREDICTED: lutropin-choriogonadotropic hormone receptor isoform X1 [Wasmannia auropunctata]	239	353	133	154	292	222	308	170	383	191	233	177	225	163	278
CrematogasterSubCLCMeta_rep_c1753	ref|XP_011631213.1| PREDICTED: microtubule-associated protein RP/EB family member 1 isoform X2 [Pogonomyrmex barbatus]	658	767	629	293	990	804	1001	486	753	468	719	999	699	583	815
CrematogasterSubCLCMeta_rep_c1754	ref|XP_011686305.1| PREDICTED: uncharacterized protein LOC105449025 isoform X2 [Wasmannia auropunctata]	186	429	566	498	415	553	327	958	878	464	730	643	493	1032	385
CrematogasterSubCLCMeta_rep_c1755	ref|XP_011865311.1| PREDICTED: myosin-IIIb-like isoform X3 [Vollenhovia emeryi]	150	40	108	18	54	163	130	152	193	65	273	152	590	68	101
CrematogasterSubCLCMeta_rep_c1756	ref|XP_018392914.1| PREDICTED: dystrobrevin beta-like, partial [Cyphomyrmex costatus]	257	95	187	129	197	106	305	106	327	181	324	240	263	152	209
CrematogasterSubCLCMeta_rep_c1757	ref|XP_011867570.1| PREDICTED: dipeptidyl peptidase 3 [Vollenhovia emeryi]	2932	548	1031	912	994	1690	1924	2798	1113	1322	251	2242	2062	2457	1748
CrematogasterSubCLCMeta_rep_c1758	ref|XP_018312877.1| PREDICTED: MKI67 FHA domain-interacting nucleolar phosphoprotein-like [Trachymyrmex zeteki]	53	78	73	103	87	339	52	101	63	0	300	113	90	86	69
CrematogasterSubCLCMeta_rep_c1759	ref|XP_012521351.1| PREDICTED: gamma-tubulin complex component 4 [Monomorium pharaonis]	381	142	307	346	430	281	353	284	355	353	460	165	458	173	342
CrematogasterSubCLCMeta_rep_c1760	ref|XP_018305049.1| PREDICTED: DEAD-box ATP-dependent RNA helicase 20-like [Trachymyrmex zeteki]	2156	504	536	2221	2777	1063	3503	2266	3610	1479	7556	270	5001	406	669
CrematogasterSubCLCMeta_rep_c1761	ref|XP_011693673.1| PREDICTED: armadillo segment polarity protein isoform X4 [Wasmannia auropunctata]	1275	810	1763	682	668	1630	1632	549	1963	797	2001	0	721	884	0
CrematogasterSubCLCMeta_c1762	ref|XP_018580291.1| PREDICTED: uncharacterized protein LOC108917951 [Anoplophora glabripennis]	36	0	19	20	56	15	7	19	52	0	112	3	35	0	176
CrematogasterSubCLCMeta_rep_c1763	ref|XP_012543662.1| PREDICTED: daple-like protein [Monomorium pharaonis]	135	129	132	119	160	111	162	115	160	99	139	149	147	83	144
CrematogasterSubCLCMeta_rep_c1764	ref|XP_011168230.1| PREDICTED: uncharacterized protein LOC105201756 isoform X1 [Solenopsis invicta]	78	229	134	106	154	1071	233	130	250	92	219	162	170	399	207
CrematogasterSubCLCMeta_rep_c1765	ref|XP_011697668.1| PREDICTED: THO complex subunit 2 isoform X1 [Wasmannia auropunctata]	630	137	403	692	990	380	712	576	670	492	1250	489	949	364	476
CrematogasterSubCLCMeta_rep_c1766	ref|XP_012539399.1| PREDICTED: protogenin-like [Monomorium pharaonis]	378	489	595	611	486	390	528	204	489	337	923	473	608	247	735
CrematogasterSubCLCMeta_rep_c1767	ref|XP_011873552.1| PREDICTED: protein FAN isoform X1 [Vollenhovia emeryi]	134	286	130	144	158	916	250	100	294	117	429	173	206	84	136
CrematogasterSubCLCMeta_rep_c1768	ref|XP_011163173.1| PREDICTED: pre-mRNA 3'-end-processing factor FIP1 [Solenopsis invicta]	54	0	0	0	114	0	16	10	13	0	0	0	18	0	0
CrematogasterSubCLCMeta_rep_c1769	ref|XP_011868397.1| PREDICTED: dual specificity tyrosine-phosphorylation-regulated kinase 4 isoform X6 [Vollenhovia emeryi]	85	145	79	17	200	310	106	77	213	42	833	133	194	68	161
CrematogasterSubCLCMeta_rep_c1770	ref|XP_011145456.1| PREDICTED: uncharacterized protein LOC105186742 [Harpegnathos saltator]	1246	79	36	521	547	275	639	495	609	1317	0	14	1018	90	249
CrematogasterSubCLCMeta_rep_c1771	ref|XP_011145456.1| PREDICTED: uncharacterized protein LOC105186742 [Harpegnathos saltator]	402	108	82	494	766	307	679	766	648	101	259	127	295	112	78
CrematogasterSubCLCMeta_rep_c1772	ref|XP_012165157.1| uncharacterized protein LOC100644131 isoform X3 [Bombus terrestris]	78	54	74	55	116	161	103	71	132	41	208	85	147	143	89
CrematogasterSubCLCMeta_rep_c1773	ref|XP_011865228.1| PREDICTED: vacuolar protein sorting-associated protein 13D [Vollenhovia emeryi]	395	746	1135	610	459	961	414	310	445	30	755	959	331	1045	1342
CrematogasterSubCLCMeta_rep_c1774	ref|XP_011644682.1| PREDICTED: bifunctional methylenetetrahydrofolate dehydrogenase/cyclohydrolase, mitochondrial [Pogonomyrmex barbatus]	175	34	130	255	205	198	258	611	218	160	1228	66	299	1	24
CrematogasterSubCLCMeta_rep_c1775	ref|XP_011874364.1| PREDICTED: ubiquitin carboxyl-terminal hydrolase 7 isoform X1 [Vollenhovia emeryi]	475	1535	1613	118	610	762	323	238	915	12	552	1001	334	1929	1757
CrematogasterSubCLCMeta_rep_c1776	ref|XP_011173200.1| PREDICTED: uncharacterized protein LOC105205522 [Solenopsis invicta]	392	445	577	167	228	1552	152	162	240	7	206	904	224	553	714
CrematogasterSubCLCMeta_rep_c1777	ref|XP_012533163.1| PREDICTED: uncharacterized protein LOC105834882 [Monomorium pharaonis]	42	90	170	95	80	159	56	43	119	79	124	144	56	59	95
CrematogasterSubCLCMeta_rep_c1778	ref|XP_018400440.1| PREDICTED: axin isoform X1 [Cyphomyrmex costatus]	1163	1167	1390	1035	1274	2448	1292	1138	1565	905	2122	1351	1830	1403	1676
CrematogasterSubCLCMeta_rep_c1779	ref|XP_018310000.1| PREDICTED: omega-amidase NIT2 isoform X1 [Trachymyrmex zeteki]	1135	837	1279	917	934	1057	1123	1241	831	351	1237	1620	1001	1552	1724
CrematogasterSubCLCMeta_rep_c1780	ref|XP_012230769.1| PREDICTED: uncharacterized protein LOC105677038 isoform X1 [Linepithema humile]	155	185	177	104	154	230	142	146	375	49	253	205	193	97	189
CrematogasterSubCLCMeta_rep_c1781	ref|XP_015376039.1| PREDICTED: uncharacterized protein LOC107170435 [Diuraphis noxia]	218	133	201	49	135	41	297	10	12	21	40	130	20	274	32
CrematogasterSubCLCMeta_rep_c1782	ref|XP_018304444.1| PREDICTED: FERM, RhoGEF and pleckstrin domain-containing protein 1-like isoform X2 [Trachymyrmex zeteki]	402	589	730	324	87	114	280	364	550	63	734	395	761	731	402
CrematogasterSubCLCMeta_rep_c1783	ref|XP_011869396.1| PREDICTED: soluble guanylate cyclase 88E isoform X5 [Vollenhovia emeryi]	31	221	84	50	94	186	119	30	231	1	163	69	46	33	147
CrematogasterSubCLCMeta_rep_c1784	ref|XP_011689053.1| PREDICTED: discoidin domain-containing receptor 2-like [Wasmannia auropunctata]	34	224	110	56	93	95	194	58	162	35	281	118	15	34	226
CrematogasterSubCLCMeta_rep_c1785	ref|XP_018353049.1| PREDICTED: transmembrane and TPR repeat-containing protein 1-like [Trachymyrmex septentrionalis]	31	199	10	24	199	251	297	27	299	50	301	115	111	16	290
CrematogasterSubCLCMeta_rep_c1786	ref|XP_014213731.1| PREDICTED: protein MON2 homolog isoform X1 [Copidosoma floridanum]	11	28	59	41	11	0	10	3	7	29	18	64	10	70	15
CrematogasterSubCLCMeta_rep_c1787	ref|XP_011863469.1| PREDICTED: ecdysone-induced protein 78C isoform X2 [Vollenhovia emeryi]	0	112	3	0	127	119	212	10	140	0	151	47	10	1	144
CrematogasterSubCLCMeta_c1788	#N/A	65	36	335	39	50	35	24	32	40	26	0	125	24	15	43
CrematogasterSubCLCMeta_rep_c1789	ref|XP_018352875.1| PREDICTED: glycogen-binding subunit 76A isoform X1 [Trachymyrmex septentrionalis]	2082	85	86	908	1261	2256	858	1161	944	1485	819	64	486	57	148
CrematogasterSubCLCMeta_c1790	ref|XP_011874786.1| PREDICTED: retinoblastoma-binding protein 5 homolog [Vollenhovia emeryi]	1571	1714	1591	1563	1450	1455	1160	1634	1414	876	1203	1629	1388	1538	1628
CrematogasterSubCLCMeta_rep_c1791	ref|XP_011868713.1| PREDICTED: thioredoxin reductase 2, mitochondrial isoform X2 [Vollenhovia emeryi]	5531	2164	3483	5451	4702	2386	4293	4681	3945	6207	12090	4202	4377	3295	3403
CrematogasterSubCLCMeta_rep_c1792	ref|XP_011863633.1| PREDICTED: protein tramtrack, alpha isoform-like isoform X2 [Vollenhovia emeryi]	28	86	64	57	30	19	82	44	134	32	72	136	30	169	161
CrematogasterSubCLCMeta_rep_c1793	ref|XP_011703524.1| PREDICTED: myotubularin-related protein 14 [Wasmannia auropunctata]	647	353	458	694	226	220	543	219	467	141	518	213	350	367	286
CrematogasterSubCLCMeta_rep_c1794	ref|XP_011156203.1| PREDICTED: neurotrimin-like isoform X1 [Solenopsis invicta]	5	200	48	0	311	112	239	21	308	25	410	128	25	52	231
CrematogasterSubCLCMeta_rep_c1795	ref|XP_011880162.1| PREDICTED: spatacsin isoform X1 [Vollenhovia emeryi]	189	163	151	223	203	197	206	146	141	87	189	191	125	134	189
CrematogasterSubCLCMeta_rep_c1796	ref|XP_012057472.1| PREDICTED: uncharacterized protein LOC105620592 [Atta cephalotes]	319	85	116	124	222	261	205	431	513	201	50	166	512	184	228
CrematogasterSubCLCMeta_rep_c1797	ref|XP_011703796.1| PREDICTED: uncharacterized protein LOC105459452 isoform X1 [Wasmannia auropunctata]	766	928	702	908	859	1326	650	620	799	731	237	749	685	1272	1116
CrematogasterSubCLCMeta_rep_c1798	ref|XP_018302364.1| PREDICTED: laccase-4-like isoform X1 [Trachymyrmex zeteki]	338	621	682	343	616	157	402	552	771	204	365	453	406	622	449
CrematogasterSubCLCMeta_rep_c1799	ref|XP_011879880.1| PREDICTED: uncharacterized protein LOC105568656 [Vollenhovia emeryi]	1128	162	120	883	1663	374	1095	1356	1134	1081	519	133	957	176	121
CrematogasterSubCLCMeta_rep_c1800	ref|XP_011702637.1| PREDICTED: MAGUK p55 subfamily member 7 isoform X4 [Wasmannia auropunctata]	127	84	81	50	113	120	84	53	84	58	205	125	221	0	118
CrematogasterSubCLCMeta_rep_c1801	ref|XP_011882286.1| PREDICTED: lysosomal alpha-glucosidase-like [Vollenhovia emeryi]	100	494	298	425	132	1825	145	207	235	149	300	450	149	110	626
CrematogasterSubCLCMeta_rep_c1802	ref|XP_011706722.1| PREDICTED: protein quiver [Wasmannia auropunctata]	123	3142	20536	618	567	2196	142	94	3352	694	19	11525	112	4145	8248
CrematogasterSubCLCMeta_c1803	ref|XP_012235936.1| PREDICTED: uncharacterized protein LOC105680082 [Linepithema humile]	0	34	58	27	1	0	9	5	20	0	7	9	3	10	7
CrematogasterSubCLCMeta_c1804	ref|XP_015510071.1| PREDICTED: uncharacterized protein LOC107217180 [Neodiprion lecontei]	32	314	313	151	23	815	63	72	95	71	137	141	38	217	188
CrematogasterSubCLCMeta_rep_c1805	ref|XP_018305544.1| PREDICTED: uncharacterized protein LOC108723964 [Trachymyrmex zeteki]	185	91	35	71	110	11	100	32	120	0	6	80	108	103	78
CrematogasterSubCLCMeta_rep_c1806	ref|XP_011642341.1| PREDICTED: LOW QUALITY PROTEIN: structural maintenance of chromosomes protein 2 [Pogonomyrmex barbatus]	737	516	844	397	525	553	807	551	696	298	627	752	697	659	729
CrematogasterSubCLCMeta_rep_c1807	ref|XP_018346259.1| PREDICTED: chondroitin sulfate synthase 1 [Trachymyrmex septentrionalis]	4	61	9	55	60	51	90	50	126	0	265	73	79	114	100
CrematogasterSubCLCMeta_rep_c1808	ref|XP_012528008.1| PREDICTED: C-1-tetrahydrofolate synthase, cytoplasmic isoform X1 [Monomorium pharaonis]	138	4041	1746	613	892	113	219	1911	361	962	15253	2818	445	2308	2034
CrematogasterSubCLCMeta_rep_c1809	ref|XP_015520500.1| PREDICTED: NTF2-related export protein [Neodiprion lecontei]	20	21	24	19	58	82	68	22	39	17	60	38	72	23	54
CrematogasterSubCLCMeta_rep_c1810	ref|XP_018300575.1| PREDICTED: sterol O-acyltransferase 1-like isoform X1 [Trachymyrmex zeteki]	931	45	470	292	1001	255	511	474	291	281	168	299	119	172	479
CrematogasterSubCLCMeta_rep_c1811	ref|XP_012230958.1| PREDICTED: uncharacterized protein LOC105677135 [Linepithema humile]	83	91	21	66	80	53	45	68	32	46	0	28	29	11	53
CrematogasterSubCLCMeta_rep_c1812	ref|XP_011876160.1| PREDICTED: uncharacterized protein LOC105566624 isoform X1 [Vollenhovia emeryi]	937	467	817	890	1103	925	1119	550	1010	322	2181	397	1478	564	978
CrematogasterSubCLCMeta_rep_c1813	ref|XP_011692080.1| PREDICTED: uncharacterized protein LOC105452565 isoform X1 [Wasmannia auropunctata]	1473	922	1136	1547	1859	4126	1741	1532	1647	1321	1295	1270	1498	1041	1220
CrematogasterSubCLCMeta_rep_c1814	ref|XP_011863436.1| PREDICTED: GRIP and coiled-coil domain-containing protein 2 isoform X2 [Vollenhovia emeryi]	431	424	1086	421	939	762	398	499	656	796	1139	759	1076	800	807
CrematogasterSubCLCMeta_rep_c1815	ref|XP_019884468.1| PREDICTED: peptidoglycan-recognition protein LC isoform X2 [Camponotus floridanus]	159	122	48	67	93	26	80	187	68	144	18	66	60	47	149
CrematogasterSubCLCMeta_rep_c1816	ref|XP_011164050.1| PREDICTED: protein phosphatase 1 regulatory subunit 12A isoform X5 [Solenopsis invicta]	366	561	777	490	617	1047	497	401	570	666	863	631	738	615	558
CrematogasterSubCLCMeta_rep_c1817	ref|XP_011865081.1| PREDICTED: NEDD8-activating enzyme E1 catalytic subunit [Vollenhovia emeryi]	492	747	864	732	525	987	858	1094	657	722	2582	779	1261	1171	1410
CrematogasterSubCLCMeta_rep_c1818	ref|XP_011677623.1| PREDICTED: LOW QUALITY PROTEIN: carnitine O-palmitoyltransferase 1, liver isoform [Strongylocentrotus purpuratus]	15	55	54	10	86	49	29	24	86	27	77	44	96	62	55
CrematogasterSubCLCMeta_rep_c1819	ref|XP_011159307.1| PREDICTED: inositol-tetrakisphosphate 1-kinase-like [Solenopsis invicta]	344	137	36	213	629	112	89	278	453	448	264	277	275	285	68
CrematogasterSubCLCMeta_rep_c1820	ref|XP_018346744.1| PREDICTED: RING finger protein unkempt homolog isoform X5 [Trachymyrmex septentrionalis]	2068	2460	2490	2377	2652	3160	2582	1937	2626	2158	2906	2391	2615	2179	3346
CrematogasterSubCLCMeta_rep_c1821	ref|XP_018314133.1| PREDICTED: cell adhesion molecule 2-like isoform X2 [Trachymyrmex zeteki]	13	229	0	82	176	26	273	26	362	0	487	211	12	81	192
CrematogasterSubCLCMeta_rep_c1822	ref|XP_018901736.1| PREDICTED: probable asparagine--tRNA ligase, mitochondrial isoform X1 [Bemisia tabaci]	77	100	120	92	27	268	81	51	40	89	6	35	79	74	43
CrematogasterSubCLCMeta_rep_c1823	ref|XP_018397850.1| PREDICTED: uncharacterized protein LOC108775891 isoform X1 [Cyphomyrmex costatus]	46	80	233	139	146	89	206	70	142	78	164	218	203	78	158
CrematogasterSubCLCMeta_rep_c1824	ref|XP_011866442.1| PREDICTED: tektin-2 [Vollenhovia emeryi]	4287	3773	5740	4889	5268	4012	4914	4232	4615	4364	4609	5799	5023	4383	4782
CrematogasterSubCLCMeta_rep_c1825	ref|XP_011687683.1| PREDICTED: proteasome inhibitor PI31 subunit isoform X1 [Wasmannia auropunctata]	370	289	433	450	412	337	317	188	331	415	797	239	365	603	311
CrematogasterSubCLCMeta_rep_c1826	ref|XP_012063920.1| PREDICTED: regulator of telomere elongation helicase 1 homolog [Atta cephalotes]	148	148	90	71	224	325	188	87	164	57	176	229	186	268	198
CrematogasterSubCLCMeta_rep_c1827	ref|XP_011062646.1| PREDICTED: BMP-binding endothelial regulator protein [Acromyrmex echinatior]	1668	1073	2086	2466	1286	1234	1281	1417	2012	1488	3413	1051	2255	1548	1393
CrematogasterSubCLCMeta_c1828	ref|XP_012059500.1| PREDICTED: sodium channel protein 60E-like [Atta cephalotes]	43	198	76	50	138	203	115	28	244	104	213	46	73	42	235
CrematogasterSubCLCMeta_rep_c1829	ref|XP_011156571.1| PREDICTED: phosphoinositide 3-kinase adapter protein 1 isoform X2 [Solenopsis invicta]	0	0	71	0	41	14	198	145	162	104	303	32	170	12	181
CrematogasterSubCLCMeta_rep_c1830	ref|XP_011703242.1| PREDICTED: histone-lysine N-methyltransferase trithorax [Wasmannia auropunctata]	283	572	672	445	709	969	1031	443	753	534	1192	580	692	461	843
CrematogasterSubCLCMeta_rep_c1831	ref|XP_011866156.1| PREDICTED: protein HOS4-like isoform X2 [Vollenhovia emeryi]	341	172	322	366	391	262	442	304	445	482	559	297	453	266	257
CrematogasterSubCLCMeta_rep_c1832	ref|XP_011158713.1| PREDICTED: battenin [Solenopsis invicta]	42	81	21	73	33	122	129	177	133	35	113	112	136	0	140
CrematogasterSubCLCMeta_rep_c1833	#N/A	141	215	234	152	126	231	253	99	271	52	408	134	287	169	246
CrematogasterSubCLCMeta_rep_c1834	ref|XP_018053396.1| PREDICTED: nicotinate phosphoribosyltransferase isoform X2 [Atta colombica]	1504	1069	1753	1452	1441	1500	1434	1213	1866	1558	1630	1591	2534	2467	1741
CrematogasterSubCLCMeta_rep_c1835	ref|XP_012522922.1| PREDICTED: hemicentin-2 [Monomorium pharaonis]	187	303	411	393	190	830	204	80	183	150	102	262	196	398	653
CrematogasterSubCLCMeta_rep_c1836	ref|XP_011690615.1| PREDICTED: cytosolic non-specific dipeptidase [Wasmannia auropunctata]	3539	2165	2929	3511	3720	1165	3692	3369	2978	3450	2377	4175	4888	3698	3334
CrematogasterSubCLCMeta_rep_c1837	ref|XP_011057779.1| PREDICTED: WAS protein family homolog 1 [Acromyrmex echinatior]	1005	624	774	1355	1419	896	1397	1280	1152	1382	1458	627	1037	954	792
CrematogasterSubCLCMeta_rep_c1838	ref|XP_011688589.1| PREDICTED: KN motif and ankyrin repeat domain-containing protein 1 isoform X2 [Wasmannia auropunctata]	526	573	948	648	809	998	404	775	1308	724	1655	1555	1349	623	459
CrematogasterSubCLCMeta_rep_c1839	#N/A	0	13	137	39	68	29	28	32	106	0	92	29	159	120	122
CrematogasterSubCLCMeta_rep_c1840	ref|XP_011870843.1| PREDICTED: zinc finger protein 236-like isoform X3 [Vollenhovia emeryi]	888	1304	1291	642	377	1688	216	441	635	644	551	919	369	510	1066
CrematogasterSubCLCMeta_rep_c1841	ref|XP_011866046.1| PREDICTED: dual serine/threonine and tyrosine protein kinase-like isoform X1 [Vollenhovia emeryi]	625	596	577	408	441	469	442	363	633	401	1843	669	596	499	480
CrematogasterSubCLCMeta_rep_c1842	ref|XP_018367869.1| PREDICTED: uncharacterized protein LOC108764234 isoform X1 [Trachymyrmex cornetzi]	222	268	246	21	537	333	536	253	498	130	104	157	361	35	164
CrematogasterSubCLCMeta_rep_c1843	#N/A	34	21	73	62	47	44	14	39	38	35	16	55	31	83	72
CrematogasterSubCLCMeta_rep_c1844	#N/A	32	57	54	37	77	221	50	61	23	83	73	69	39	15	44
CrematogasterSubCLCMeta_rep_c1845	ref|XP_011883753.1| PREDICTED: uncharacterized protein LOC105570907 isoform X4 [Vollenhovia emeryi]	250	6	39	272	327	9	325	202	337	295	264	10	458	1	39
CrematogasterSubCLCMeta_rep_c1846	ref|XP_018309894.1| PREDICTED: protein transport protein Sec24B isoform X2 [Trachymyrmex zeteki]	0	100	5	39	123	265	128	8	170	0	136	131	17	7	185
CrematogasterSubCLCMeta_rep_c1847	ref|XP_018377638.1| PREDICTED: BAG domain-containing protein Samui-like isoform X2 [Trachymyrmex cornetzi]	638	676	1232	599	383	1011	690	554	737	1143	2777	745	858	1411	812
CrematogasterSubCLCMeta_rep_c1848	ref|XP_018303023.1| PREDICTED: serine/threonine-protein phosphatase 4 regulatory subunit 4-like isoform X4 [Trachymyrmex zeteki]	334	488	670	165	260	487	212	98	274	241	172	480	168	566	631
CrematogasterSubCLCMeta_rep_c1849	ref|XP_018311080.1| PREDICTED: laminin subunit gamma-1 [Trachymyrmex zeteki]	589	268	320	97	424	458	417	286	463	61	163	367	226	152	431
CrematogasterSubCLCMeta_rep_c1850	ref|XP_011059081.1| PREDICTED: serine/arginine repetitive matrix protein 1-like [Acromyrmex echinatior]	33	639	130	83	474	759	1041	55	846	7	823	436	22	135	878
CrematogasterSubCLCMeta_rep_c1851	#N/A	39	24	63	24	33	33	94	26	53	68	70	50	27	21	43
CrematogasterSubCLCMeta_rep_c1852	ref|XP_011690841.1| PREDICTED: protein timeless homolog isoform X2 [Wasmannia auropunctata]	151	59	92	50	200	77	69	64	66	80	220	105	243	77	84
CrematogasterSubCLCMeta_rep_c1853	ref|XP_018400999.1| PREDICTED: serine/threonine-protein kinase ULK3 isoform X1 [Cyphomyrmex costatus]	15	46	25	30	97	78	56	51	44	0	73	25	23	65	46
CrematogasterSubCLCMeta_rep_c1854	ref|XP_011869095.1| PREDICTED: cytochrome P450 CYP12A2-like [Vollenhovia emeryi]	1276	8	852	1555	658	3292	982	579	1393	459	9	183	9	270	205
CrematogasterSubCLCMeta_rep_c1855	ref|XP_018377251.1| PREDICTED: uncharacterized protein LOC108770258 [Trachymyrmex cornetzi]	952	860	1559	757	731	882	854	690	974	766	5306	1120	1297	674	826
CrematogasterSubCLCMeta_rep_c1856	ref|XP_018304911.1| PREDICTED: gem-associated protein 5 [Trachymyrmex zeteki]	385	288	182	0	968	7	163	586	727	435	761	130	463	0	549
CrematogasterSubCLCMeta_rep_c1857	ref|XP_018357545.1| PREDICTED: LOW QUALITY PROTEIN: T-box transcription factor TBX20-like [Trachymyrmex cornetzi]	50	63	97	25	94	108	51	24	116	242	139	100	104	128	90
CrematogasterSubCLCMeta_rep_c1858	ref|XP_011164614.1| PREDICTED: ecdysone-induced protein 75B, isoform B [Solenopsis invicta]	120	304	374	153	321	376	314	128	283	180	261	371	325	208	479
CrematogasterSubCLCMeta_rep_c1859	ref|XP_018368877.1| PREDICTED: uncharacterized protein LOC108764952 [Trachymyrmex cornetzi]	93	107	183	87	84	142	120	54	214	83	5829	72	330	133	99
CrematogasterSubCLCMeta_rep_c1860	#N/A	776	840	650	568	991	940	959	627	1004	462	1257	880	1007	637	884
CrematogasterSubCLCMeta_rep_c1861	ref|XP_018053412.1| PREDICTED: sodium/hydrogen exchanger 3 isoform X2 [Atta colombica]	479	761	627	451	856	401	768	488	734	812	1536	968	572	772	3390
CrematogasterSubCLCMeta_rep_c1862	ref|XP_011867025.1| PREDICTED: mitochondrial-processing peptidase subunit alpha isoform X2 [Vollenhovia emeryi]	6159	414	725	6828	6789	5587	5519	4996	7759	4181	3329	719	4817	330	480
CrematogasterSubCLCMeta_rep_c1863	ref|XP_011879505.1| PREDICTED: succinate dehydrogenase [ubiquinone] flavoprotein subunit, mitochondrial-like [Vollenhovia emeryi]	293	189	240	46	481	101	150	213	243	241	334	418	1756	183	5
CrematogasterSubCLCMeta_rep_c1864	ref|XP_011706161.1| PREDICTED: LOW QUALITY PROTEIN: cysteine-rich protein 2-binding protein-like [Wasmannia auropunctata]	1809	218	321	1689	1756	989	1472	1431	1968	1166	1763	504	1517	349	487
CrematogasterSubCLCMeta_rep_c1865	ref|XP_011170535.1| PREDICTED: protein ovo [Solenopsis invicta]	94	90	240	185	117	256	81	85	130	12	310	160	179	335	194
CrematogasterSubCLCMeta_rep_c1866	ref|XP_018309782.1| PREDICTED: uncharacterized protein LOC108726606 isoform X2 [Trachymyrmex zeteki]	88	18	48	36	196	97	313	86	320	274	128	32	225	21	84
CrematogasterSubCLCMeta_rep_c1867	ref|XP_011158746.1| PREDICTED: zeta-sarcoglycan isoform X1 [Solenopsis invicta]	43	35	104	38	104	90	94	90	129	204	191	171	29	86	173
CrematogasterSubCLCMeta_rep_c1868	ref|XP_017857463.1| PREDICTED: glyoxylate reductase/hydroxypyruvate reductase [Drosophila arizonae]	194	136	163	128	216	109	138	97	89	68	84	72	115	181	163
CrematogasterSubCLCMeta_rep_c1869	ref|XP_018339558.1| PREDICTED: sterile alpha and TIR motif-containing protein 1 isoform X6 [Trachymyrmex septentrionalis]	2984	1925	3563	636	292	2415	636	1928	175	2835	5414	1815	3045	2721	2779
CrematogasterSubCLCMeta_rep_c1870	ref|XP_018007002.1| PREDICTED: uncharacterized protein LOC108664819, partial [Hyalella azteca]	175	77	187	151	171	113	137	78	233	153	793	136	185	134	212
CrematogasterSubCLCMeta_rep_c1871	ref|XP_011872049.1| PREDICTED: fumarylacetoacetate hydrolase domain-containing protein 2A isoform X2 [Vollenhovia emeryi]	1533	1672	1601	1037	828	981	1228	1617	1273	1481	2332	1848	1951	1350	1621
CrematogasterSubCLCMeta_c1872	ref|XP_011875246.1| PREDICTED: ATPase family AAA domain-containing protein 5 [Vollenhovia emeryi]	103	53	110	85	120	75	76	57	112	59	112	87	146	112	47
CrematogasterSubCLCMeta_rep_c1873	ref|XP_011058829.1| PREDICTED: hairy/enhancer-of-split related with YRPW motif protein 1 isoform X2 [Acromyrmex echinatior]	1395	453	1067	465	760	567	1006	513	1077	1166	1551	361	283	85	262
CrematogasterSubCLCMeta_rep_c1874	ref|XP_011161605.1| PREDICTED: 26S proteasome non-ATPase regulatory subunit 2-like [Solenopsis invicta]	1014	1184	1549	879	1087	1119	910	853	1363	769	1977	1230	1527	1012	1011
CrematogasterSubCLCMeta_rep_c1875	ref|XP_019698231.1| PREDICTED: 40S ribosomal protein S9 isoform X2 [Harpegnathos saltator]	167	330	586	503	332	467	823	170	255	1043	3955	531	526	500	606
CrematogasterSubCLCMeta_rep_c1876	ref|XP_011861020.1| PREDICTED: ubiquitin carboxyl-terminal hydrolase 34 [Vollenhovia emeryi]	352	540	857	328	248	1555	16	32	27	426	443	419	207	617	906
CrematogasterSubCLCMeta_rep_c1877	ref|XP_011693330.1| PREDICTED: tyrosine-protein phosphatase non-receptor type 9 [Wasmannia auropunctata]	750	583	557	276	637	1364	547	221	673	336	1036	732	651	629	792
CrematogasterSubCLCMeta_rep_c1878	ref|XP_011870850.1| PREDICTED: RNA polymerase II-associated protein 1 isoform X2 [Vollenhovia emeryi]	141	59	194	258	289	84	283	280	220	262	409	213	396	169	225
CrematogasterSubCLCMeta_rep_c1879	ref|XP_011645576.1| PREDICTED: dopamine receptor 1 isoform X1 [Pogonomyrmex barbatus]	57	186	55	32	193	173	146	32	187	42	412	190	77	56	173
CrematogasterSubCLCMeta_rep_c1880	ref|XP_011869639.1| PREDICTED: PH-interacting protein isoform X1 [Vollenhovia emeryi]	1810	1109	1722	1499	1714	2079	1597	1427	1741	1674	2542	1640	1992	1414	1685
CrematogasterSubCLCMeta_rep_c1881	ref|XP_011173250.1| PREDICTED: armadillo repeat-containing protein 8-like [Solenopsis invicta]	921	710	865	716	1002	958	923	619	746	822	1030	1022	881	514	860
CrematogasterSubCLCMeta_rep_c1882	ref|XP_018342258.1| PREDICTED: sodium-dependent neutral amino acid transporter B(0)AT3 [Trachymyrmex septentrionalis]	0	148	0	25	216	142	67	0	3	0	78	113	0	0	205
CrematogasterSubCLCMeta_rep_c1883	ref|XP_018047068.1| PREDICTED: proteolipid protein DM beta isoform X2 [Atta colombica]	11	183	73	211	0	583	54	2	32	63	2	177	0	266	79
CrematogasterSubCLCMeta_rep_c1884	ref|XP_011874464.1| PREDICTED: multiple inositol polyphosphate phosphatase 1 isoform X2 [Vollenhovia emeryi]	96	0	36	0	23	122	0	20	0	0	12	0	0	0	18
CrematogasterSubCLCMeta_c1885	ref|XP_018396298.1| PREDICTED: uncharacterized protein LOC108774646 [Cyphomyrmex costatus]	59	32	120	167	110	178	47	44	96	61	166	86	87	74	99
CrematogasterSubCLCMeta_rep_c1886	ref|XP_018915507.1| PREDICTED: uncharacterized protein LOC109042972 isoform X1 [Bemisia tabaci]	69	37	46	9	7	15	27	37	24	136	68	46	33	55	43
CrematogasterSubCLCMeta_rep_c1887	ref|XP_011690825.1| PREDICTED: uncharacterized protein LOC105451830 [Wasmannia auropunctata]	0	137	37	27	388	131	256	0	277	0	317	150	0	0	297
CrematogasterSubCLCMeta_rep_c1888	#N/A	38	43	28	43	91	116	45	90	57	0	122	22	84	81	78
CrematogasterSubCLCMeta_rep_c1889	ref|XP_011881081.1| PREDICTED: uncharacterized protein LOC105569326 [Vollenhovia emeryi]	53	98	60	146	70	322	141	46	157	52	182	65	182	99	119
CrematogasterSubCLCMeta_rep_c1890	ref|XP_011691460.1| PREDICTED: lipid storage droplets surface-binding protein 2-like [Wasmannia auropunctata]	365	93	246	209	443	403	328	224	349	250	225	448	234	638	615
CrematogasterSubCLCMeta_rep_c1891	ref|XP_011873537.1| PREDICTED: caspase-1 [Vollenhovia emeryi]	1067	948	1687	1119	1454	1697	1116	702	1117	966	1281	1496	1307	1128	1488
CrematogasterSubCLCMeta_rep_c1892	ref|XP_018309530.1| PREDICTED: cytosolic purine 5'-nucleotidase isoform X1 [Trachymyrmex zeteki]	797	534	345	373	702	608	427	669	405	573	875	500	564	1128	448
CrematogasterSubCLCMeta_rep_c1893	ref|XP_011866901.1| PREDICTED: sodium-independent sulfate anion transporter-like isoform X3 [Vollenhovia emeryi]	516	265	178	335	224	199	193	236	479	280	419	342	922	491	327
CrematogasterSubCLCMeta_rep_c1894	ref|XP_011164816.1| PREDICTED: diacylglycerol kinase eta isoform X4 [Solenopsis invicta]	160	308	181	151	407	17	351	72	578	94	501	331	266	215	512
CrematogasterSubCLCMeta_rep_c1895	ref|XP_011865196.1| PREDICTED: uncharacterized protein LOC105560578 isoform X1 [Vollenhovia emeryi]	79	151	62	108	198	410	167	46	104	88	131	264	151	85	129
CrematogasterSubCLCMeta_c1896	ref|XP_011872624.1| PREDICTED: uncharacterized protein LOC105564681 isoform X3 [Vollenhovia emeryi]	5	5	58	6	11	0	7	1	3	0	76	5	90	20	3
CrematogasterSubCLCMeta_rep_c1897	#N/A	173	144	240	140	61	175	181	83	187	67	144	122	135	140	194
CrematogasterSubCLCMeta_rep_c1898	ref|XP_018366139.1| PREDICTED: WAS/WASL-interacting protein family member 1-like [Trachymyrmex cornetzi]	42	0	9	34	24	0	27	8	12	8	39	38	18	0	16
CrematogasterSubCLCMeta_rep_c1899	ref|XP_018360006.1| PREDICTED: E3 ubiquitin-protein ligase TRIM9 isoform X2 [Trachymyrmex cornetzi]	37	84	100	115	72	130	177	67	91	63	119	36	168	83	229
CrematogasterSubCLCMeta_rep_c1900	ref|XP_011701472.1| PREDICTED: carbohydrate sulfotransferase 11-like [Wasmannia auropunctata]	36	45	137	6	3	201	31	10	27	24	0	79	10	64	158
CrematogasterSubCLCMeta_rep_c1901	ref|XP_011172496.1| PREDICTED: uncharacterized protein LOC105204915, partial [Solenopsis invicta]	216	24	106	291	366	21	235	161	166	98	133	156	216	75	154
CrematogasterSubCLCMeta_rep_c1902	ref|XP_018340247.1| PREDICTED: protein tamozhennic [Trachymyrmex septentrionalis]	548	305	400	367	567	272	492	348	479	455	514	459	538	339	512
CrematogasterSubCLCMeta_rep_c1903	ref|XP_018308052.1| PREDICTED: transcriptional regulator ERG homolog [Trachymyrmex zeteki]	1	96	22	0	119	115	187	39	196	20	237	91	30	45	114
CrematogasterSubCLCMeta_rep_c1904	ref|XP_011695348.1| PREDICTED: HEAT repeat-containing protein 1 [Wasmannia auropunctata]	181	43	289	230	91	223	232	195	209	264	1670	44	393	104	91
CrematogasterSubCLCMeta_rep_c1905	ref|XP_011881176.1| PREDICTED: uncharacterized protein LOC105569367 [Vollenhovia emeryi]	59	129	96	111	69	77	146	70	149	139	62	150	106	158	158
CrematogasterSubCLCMeta_rep_c1906	ref|XP_018308180.1| PREDICTED: uncharacterized protein LOC108725579 [Trachymyrmex zeteki]	105	77	130	104	219	204	201	85	193	266	105	160	244	223	154
CrematogasterSubCLCMeta_rep_c1907	ref|XP_011859367.1| PREDICTED: Fanconi anemia group D2 protein [Vollenhovia emeryi]	185	172	266	189	225	0	154	200	328	83	524	194	274	185	275
CrematogasterSubCLCMeta_rep_c1908	ref|XP_011256335.1| PREDICTED: peroxidase isoform X3 [Camponotus floridanus]	0	0	35	70	35	39	56	29	18	44	62	24	47	87	13
CrematogasterSubCLCMeta_rep_c1909	ref|XP_011878209.1| PREDICTED: Down syndrome cell adhesion molecule-like [Vollenhovia emeryi]	77	154	75	57	159	337	256	191	108	54	554	70	70	19	77
CrematogasterSubCLCMeta_rep_c1910	#N/A	0	169	0	0	159	231	282	3	267	1	295	115	1	0	128
CrematogasterSubCLCMeta_rep_c1911	ref|XP_018309487.1| PREDICTED: uncharacterized protein LOC108726424 isoform X1 [Trachymyrmex zeteki]	1647	1983	2201	863	2464	1686	693	1508	1712	1969	4316	2692	1892	1578	792
CrematogasterSubCLCMeta_rep_c1912	ref|XP_011873240.1| PREDICTED: transcriptional protein SWT1-like [Vollenhovia emeryi]	149	57	193	205	57	129	98	109	159	128	43	99	114	205	118
CrematogasterSubCLCMeta_rep_c1913	ref|XP_011055827.1| PREDICTED: multifunctional methyltransferase subunit TRM112-like protein isoform X1 [Acromyrmex echinatior]	656	598	575	552	644	373	729	433	685	770	891	764	558	443	805
CrematogasterSubCLCMeta_rep_c1914	ref|XP_011632905.1| PREDICTED: cyclin-dependent kinase 12 isoform X4 [Pogonomyrmex barbatus]	1580	757	894	1546	1327	1244	1652	1348	1810	1256	4301	658	1712	1108	1111
CrematogasterSubCLCMeta_rep_c1915	ref|XP_018314398.1| PREDICTED: actin, alpha skeletal muscle [Trachymyrmex zeteki]	4596	12101	21809	1422	1726	3776	811	1894	1338	3418	1175	17362	2656	24035	8922
CrematogasterSubCLCMeta_rep_c1916	ref|XP_011631852.1| PREDICTED: actin-5, muscle-specific [Pogonomyrmex barbatus]	26810	3810	8045	18409	9601	1232	34429	34462	50105	47146	1688	4142	30817	7231	3281
CrematogasterSubCLCMeta_rep_c1917	#N/A	0	169	14	20	174	128	242	8	273	0	251	183	11	32	137
CrematogasterSubCLCMeta_rep_c1918	ref|XP_012530648.1| PREDICTED: RNA polymerase-associated protein CTR9 homolog [Monomorium pharaonis]	1298	154	877	1136	1213	430	941	568	191	590	2777	72	98	94	69
CrematogasterSubCLCMeta_rep_c1919	ref|XP_011866447.1| PREDICTED: serine/threonine-protein phosphatase 6 regulatory subunit 3 isoform X2 [Vollenhovia emeryi]	3236	1667	1754	2702	3097	3667	3114	2040	3371	2687	8338	2268	5214	1512	2214
CrematogasterSubCLCMeta_rep_c1920	ref|XP_011063143.1| PREDICTED: zinc finger protein on ecdysone puffs isoform X1 [Acromyrmex echinatior]	1174	119	525	829	916	1187	817	870	901	729	657	322	726	173	201
CrematogasterSubCLCMeta_rep_c1921	ref|XP_018370815.1| PREDICTED: casein kinase II subunit beta isoform X1 [Trachymyrmex cornetzi]	344	198	160	680	210	301	799	205	251	733	487	437	858	316	60
CrematogasterSubCLCMeta_rep_c1922	#N/A	11	120	10	76	107	125	155	28	202	0	179	142	58	0	153
CrematogasterSubCLCMeta_rep_c1923	ref|XP_018337319.1| PREDICTED: uncharacterized protein LOC108745587 [Trachymyrmex septentrionalis]	47	183	35	18	146	252	104	21	285	0	115	54	63	27	201
CrematogasterSubCLCMeta_rep_c1924	ref|XP_012535095.1| PREDICTED: SH3 and multiple ankyrin repeat domains protein 1 isoform X4 [Monomorium pharaonis]	36	296	197	286	316	860	298	69	260	46	454	374	164	78	408
CrematogasterSubCLCMeta_rep_c1925	ref|XP_018369050.1| PREDICTED: uncharacterized protein LOC108765052 [Trachymyrmex cornetzi]	557	222	451	384	355	584	323	245	365	350	285	395	2857	511	491
CrematogasterSubCLCMeta_rep_c1926	ref|XP_018405037.1| PREDICTED: uncharacterized protein LOC108781541 [Cyphomyrmex costatus]	46	102	4	55	59	4842	68	38	34	46	45	69	56	58	63
CrematogasterSubCLCMeta_rep_c1927	ref|XP_011684555.1| PREDICTED: uncharacterized protein ZC262.3-like isoform X1 [Wasmannia auropunctata]	471	556	553	643	257	1243	423	285	400	406	446	433	701	367	679
CrematogasterSubCLCMeta_rep_c1928	ref|XP_011165052.1| PREDICTED: uncharacterized protein LOC105199594 [Solenopsis invicta]	49	70	148	69	83	198	25	23	42	35	61	93	86	146	58
CrematogasterSubCLCMeta_rep_c1929	ref|XP_017790691.1| PREDICTED: dnaJ protein homolog 1-like [Habropoda laboriosa]	19	18	0	49	10	14	29	0	0	0	0	0	0	0	0
CrematogasterSubCLCMeta_rep_c1930	#N/A	2	26	0	0	0	63	0	0	0	0	0	35	0	32	14
CrematogasterSubCLCMeta_rep_c1931	ref|XP_018306741.1| PREDICTED: histone acetyltransferase KAT6B isoform X1 [Trachymyrmex zeteki]	1714	1551	2080	2413	2706	2076	2535	1621	2380	2537	8291	1860	2122	2231	2642
CrematogasterSubCLCMeta_rep_c1932	ref|XP_011861157.1| PREDICTED: uncharacterized protein LOC105558201 isoform X1 [Vollenhovia emeryi]	431	601	589	818	496	532	642	624	687	400	494	344	657	463	898
CrematogasterSubCLCMeta_rep_c1933	ref|XP_011867718.1| PREDICTED: dual oxidase 2-like isoform X1 [Vollenhovia emeryi]	85	123	117	71	104	122	116	124	170	147	52	298	179	709	182
CrematogasterSubCLCMeta_rep_c1934	ref|XP_018360693.1| PREDICTED: probable G-protein coupled receptor 52 [Trachymyrmex cornetzi]	1387	1695	582	684	1746	638	2023	1184	1967	666	1463	1432	657	348	1733
CrematogasterSubCLCMeta_rep_c1935	ref|XP_018351549.1| PREDICTED: uncharacterized protein LOC108754032 [Trachymyrmex septentrionalis]	15	0	0	82	73	46	118	3	94	0	120	0	38	34	14
CrematogasterSubCLCMeta_rep_c1936	ref|XP_018303135.1| PREDICTED: uncharacterized protein LOC108722484 [Trachymyrmex zeteki]	106	581	901	101	374	0	438	143	376	93	362	682	378	776	640
CrematogasterSubCLCMeta_rep_c1937	ref|XP_011166127.1| PREDICTED: N-terminal kinase-like protein [Solenopsis invicta]	1282	782	1089	1638	1511	1067	1519	1554	1360	1601	2185	1020	1653	961	1087
CrematogasterSubCLCMeta_rep_c1938	ref|XP_011865738.1| PREDICTED: uncharacterized protein LOC105560862 [Vollenhovia emeryi]	99	133	130	113	211	189	133	122	218	70	232	311	176	158	179
CrematogasterSubCLCMeta_rep_c1939	ref|XP_011172642.1| PREDICTED: ubiquitin-like protein 3, partial [Solenopsis invicta]	1974	2756	2960	2322	2589	3212	3082	1864	2982	1996	3529	2518	2673	2511	3696
CrematogasterSubCLCMeta_rep_c1940	ref|XP_011156612.1| PREDICTED: dolichyl-diphosphooligosaccharide--protein glycosyltransferase subunit 1 [Solenopsis invicta]	299	472	273	107	161	5516	1172	473	332	304	665	276	874	345	309
CrematogasterSubCLCMeta_rep_c1941	ref|XP_011872584.1| PREDICTED: synaptic vesicle glycoprotein 2B-like isoform X1 [Vollenhovia emeryi]	604	653	1593	3085	1344	1485	1021	775	1130	872	431	984	680	1056	1324
CrematogasterSubCLCMeta_rep_c1942	#N/A	17	218	146	32	53	269	161	54	168	21	69	209	42	91	314
CrematogasterSubCLCMeta_rep_c1943	ref|XP_016978126.1| PREDICTED: insulin-like receptor [Drosophila rhopaloa]	1	90	61	33	48	297	70	5	90	0	71	92	45	104	163
CrematogasterSubCLCMeta_rep_c1944	ref|XP_011065559.1| PREDICTED: Down syndrome cell adhesion molecule-like protein Dscam2 isoform X1 [Acromyrmex echinatior]	0	251	1	0	385	388	467	4	449	0	320	259	3	31	307
CrematogasterSubCLCMeta_rep_c1945	ref|XP_011688169.1| PREDICTED: transcription factor E2F4 [Wasmannia auropunctata]	689	658	685	508	546	368	563	652	507	518	1263	466	580	786	459
CrematogasterSubCLCMeta_rep_c1946	ref|XP_011866034.1| PREDICTED: dihydrofolate reductase [Vollenhovia emeryi]	353	296	292	294	245	459	357	239	330	354	161	352	319	278	254
CrematogasterSubCLCMeta_rep_c1947	ref|XP_011872933.1| PREDICTED: janus kinase and microtubule-interacting protein 3-like isoform X1 [Vollenhovia emeryi]	17873	20026	29727	32309	18635	29548	20908	17216	20485	43556	21057	13206	21306	40266	20254
CrematogasterSubCLCMeta_rep_c1948	ref|XP_012525103.1| PREDICTED: apoptotic protease-activating factor 1 isoform X1 [Monomorium pharaonis]	479	536	518	294	530	475	343	250	433	220	358	505	523	312	495
CrematogasterSubCLCMeta_rep_c1949	ref|XP_011690762.1| PREDICTED: neuralized-like protein 2 isoform X2 [Wasmannia auropunctata]	31	35	62	0	271	579	182	38	32	0	20	119	105	22	114
CrematogasterSubCLCMeta_rep_c1950	ref|XP_011864194.1| PREDICTED: guanylate cyclase 32E-like [Vollenhovia emeryi]	27	603	884	0	82	182	47	11	0	0	40	552	56	46	436
CrematogasterSubCLCMeta_rep_c1951	ref|XP_011646009.1| PREDICTED: guanylate cyclase 32E-like [Pogonomyrmex barbatus]	194	0	197	49	249	12	330	12	16	24	67	11	145	78	135
CrematogasterSubCLCMeta_rep_c1952	#N/A	88	107	126	88	121	133	0	110	144	103	107	124	112	0	295
CrematogasterSubCLCMeta_rep_c1953	ref|XP_017892179.1| PREDICTED: uncharacterized protein K02A2.6-like [Ceratina calcarata]	142	54	57	66	205	0	118	97	122	72	52	106	132	93	145
CrematogasterSubCLCMeta_rep_c1954	ref|XP_011878124.1| PREDICTED: neuroligin-1 [Vollenhovia emeryi]	43	237	0	12	269	187	457	2	387	0	316	250	8	1	321
CrematogasterSubCLCMeta_rep_c1955	ref|XP_011172336.1| PREDICTED: cation diffusion facilitator family protein 1-like isoform X1 [Solenopsis invicta]	249	157	176	306	217	49	152	159	410	91	1453	164	556	251	162
CrematogasterSubCLCMeta_rep_c1956	ref|XP_011170159.1| PREDICTED: uncharacterized protein LOC105203100 isoform X2 [Solenopsis invicta]	41	37	65	27	34	111	49	29	62	52	50	56	64	19	77
CrematogasterSubCLCMeta_c1957	ref|XP_012536165.1| PREDICTED: RPII140-upstream gene protein [Monomorium pharaonis]	0	21	108	0	0	114	8	0	20	0	0	22	11	0	75
CrematogasterSubCLCMeta_rep_c1958	ref|XP_011861707.1| PREDICTED: uncharacterized protein LOC105558566, partial [Vollenhovia emeryi]	33	19	51	125	123	14	116	58	86	41	84	60	140	48	63
CrematogasterSubCLCMeta_rep_c1959	ref|XP_011878040.1| PREDICTED: calpain-A-like isoform X5 [Vollenhovia emeryi]	1736	842	1558	1642	1418	974	1543	1358	1929	1664	1525	1549	1756	1665	977
CrematogasterSubCLCMeta_rep_c1960	ref|XP_011050899.1| PREDICTED: uncharacterized protein LOC105143979 isoform X1 [Acromyrmex echinatior]	94	460	379	138	117	498	270	100	265	67	320	220	247	164	530
CrematogasterSubCLCMeta_rep_c1961	ref|XP_011694739.1| PREDICTED: frizzled-4 [Wasmannia auropunctata]	644	176	96	135	188	88	542	641	110	48	994	242	180	214	135
CrematogasterSubCLCMeta_rep_c1962	ref|XP_012534140.1| PREDICTED: MAP kinase-activating death domain protein isoform X7 [Monomorium pharaonis]	0	33	81	19	29	1029	39	0	37	0	0	54	2	2	44
CrematogasterSubCLCMeta_rep_c1963	ref|XP_011871634.1| PREDICTED: MAP kinase-activating death domain protein isoform X4 [Vollenhovia emeryi]	111	543	151	56	506	409	1180	85	1159	150	880	832	183	230	1182
CrematogasterSubCLCMeta_rep_c1964	ref|XP_018393711.1| PREDICTED: uncharacterized protein LOC108772637 [Cyphomyrmex costatus]	0	145	87	0	156	158	235	7	294	1	315	130	86	0	137
CrematogasterSubCLCMeta_c1965	ref|XP_018376319.1| PREDICTED: FMRFamide receptor isoform X2 [Trachymyrmex cornetzi]	64	158	126	33	99	158	104	42	230	208	132	53	83	129	145
CrematogasterSubCLCMeta_rep_c1966	ref|XP_018369555.1| PREDICTED: uncharacterized protein LOC108765372 isoform X1 [Trachymyrmex cornetzi]	386	340	324	122	143	415	218	192	103	395	121	365	285	420	309
CrematogasterSubCLCMeta_rep_c1967	ref|XP_011877975.1| PREDICTED: muscle segmentation homeobox-like [Vollenhovia emeryi]	1193	0	798	899	461	1990	1237	609	2080	1346	2029	345	1740	16	140
CrematogasterSubCLCMeta_rep_c1968	ref|XP_018403280.1| PREDICTED: uncharacterized protein LOC108780164 isoform X2 [Cyphomyrmex costatus]	270	722	196	335	1114	159	1709	100	1964	336	1978	609	421	89	871
CrematogasterSubCLCMeta_c1969	ref|XP_018401181.1| PREDICTED: protein grainyhead [Cyphomyrmex costatus]	102	78	70	130	16	262	120	59	129	39	32	95	45	154	79
CrematogasterSubCLCMeta_rep_c1970	ref|XP_011165229.1| PREDICTED: uncharacterized protein KIAA1109-like [Solenopsis invicta]	282	261	718	974	473	1454	400	446	960	357	472	122	568	77	549
CrematogasterSubCLCMeta_rep_c1971	ref|XP_018045731.1| PREDICTED: BTB/POZ domain-containing protein KCTD16 [Atta colombica]	0	42	0	0	59	158	155	0	141	24	110	59	4	0	182
CrematogasterSubCLCMeta_rep_c1972	ref|XP_011880034.1| PREDICTED: heat shock protein DDB_G0288861-like isoform X2 [Vollenhovia emeryi]	191	1513	2045	486	473	2054	478	372	309	284	488	1332	1048	1462	1928
CrematogasterSubCLCMeta_rep_c1973	ref|XP_011868841.1| PREDICTED: uncharacterized protein LOC105562535 isoform X2 [Vollenhovia emeryi]	491	571	714	471	629	917	808	368	727	514	802	475	365	627	670
CrematogasterSubCLCMeta_rep_c1974	ref|XP_011691540.1| PREDICTED: protein toll-like [Wasmannia auropunctata]	64	179	369	230	305	621	348	226	438	169	341	206	449	288	251
CrematogasterSubCLCMeta_rep_c1975	ref|XP_011869759.1| PREDICTED: period circadian protein isoform X3 [Vollenhovia emeryi]	1244	2020	2390	11370	7611	3048	6115	7367	3055	2798	1063	2744	1301	2552	2408
CrematogasterSubCLCMeta_rep_c1976	ref|XP_011699410.1| PREDICTED: ankyrin repeat domain-containing protein 13C isoform X4 [Wasmannia auropunctata]	186	77	48	71	113	405	63	66	135	140	123	88	170	83	42
CrematogasterSubCLCMeta_rep_c1977	ref|XP_012524127.1| PREDICTED: ATP-dependent RNA helicase WM6 isoform X1 [Monomorium pharaonis]	2469	2293	3013	2804	2717	3022	2770	2096	2744	2469	6228	2358	2855	2097	2510
CrematogasterSubCLCMeta_rep_c1978	ref|XP_011866084.1| PREDICTED: zinc finger protein 600 [Vollenhovia emeryi]	6	51	48	17	76	67	41	11	38	11	24	64	87	24	36
CrematogasterSubCLCMeta_c1979	ref|XP_018054086.1| PREDICTED: uncharacterized protein LOC108691001 [Atta colombica]	73	17	22	68	30	8	12	3	14	46	1	0	32	0	19
CrematogasterSubCLCMeta_rep_c1980	#N/A	20	142	29	138	101	146	139	72	120	36	135	123	30	230	116
CrematogasterSubCLCMeta_rep_c1981	ref|XP_011635638.1| PREDICTED: protein kinase C, brain isozyme isoform X2 [Pogonomyrmex barbatus]	531	596	279	373	295	305	939	137	874	142	286	611	150	354	855
CrematogasterSubCLCMeta_c1982	ref|XP_018317306.1| PREDICTED: uncharacterized protein LOC108731457 isoform X2 [Trachymyrmex zeteki]	5	98	275	8	105	185	124	72	255	44	181	109	371	1	125
CrematogasterSubCLCMeta_rep_c1983	ref|XP_011879961.1| PREDICTED: uncharacterized protein LOC105568703 [Vollenhovia emeryi]	268	143	271	278	253	186	371	197	228	188	625	85	393	130	209
CrematogasterSubCLCMeta_rep_c1984	ref|XP_011693889.1| PREDICTED: tRNA (guanine(10)-N2)-methyltransferase homolog isoform X1 [Wasmannia auropunctata]	1638	1208	1321	2055	1884	1850	1242	1392	1317	2354	1346	2438	1537	1983	2012
CrematogasterSubCLCMeta_rep_c1985	ref|XP_011057824.1| PREDICTED: LOW QUALITY PROTEIN: voltage-gated potassium channel subunit beta-2 [Acromyrmex echinatior]	368	755	549	531	678	1422	735	261	413	308	928	1040	311	360	663
CrematogasterSubCLCMeta_rep_c1986	ref|XP_011262567.1| PREDICTED: uncharacterized protein LOC105255138 [Camponotus floridanus]	78	45	43	199	121	6	93	199	121	156	168	92	80	171	185
CrematogasterSubCLCMeta_c1987	ref|XP_018044787.1| PREDICTED: tonsoku-like protein [Atta colombica]	74	38	105	69	57	127	52	45	86	42	307	95	97	34	89
CrematogasterSubCLCMeta_rep_c1988	#N/A	284	278	142	150	86	48	86	118	373	166	9	176	176	3	274
CrematogasterSubCLCMeta_rep_c1989	#N/A	139	482	443	217	526	606	529	294	530	200	796	574	423	292	500
CrematogasterSubCLCMeta_rep_c1990	ref|XP_011870512.1| PREDICTED: uncharacterized protein LOC105563497 [Vollenhovia emeryi]	110	246	484	101	114	288	301	205	214	0	74	391	186	634	167
CrematogasterSubCLCMeta_rep_c1991	ref|XP_011698166.1| PREDICTED: muscle LIM protein Mlp84B-like [Wasmannia auropunctata]	20	14	74	37	24	12	72	54	128	19	3	27	90	82	34
CrematogasterSubCLCMeta_rep_c1992	ref|XP_011871265.1| PREDICTED: uncharacterized protein LOC105563895 isoform X1 [Vollenhovia emeryi]	166	138	227	358	114	210	95	58	120	44	60	72	303	326	145
CrematogasterSubCLCMeta_rep_c1993	ref|XP_011173316.1| PREDICTED: uncharacterized protein LOC105205610 [Solenopsis invicta]	44	131	138	123	45	90	56	37	50	20	209	87	98	169	137
CrematogasterSubCLCMeta_rep_c1994	ref|XP_019888889.1| PREDICTED: GTP-binding protein Di-Ras2 [Ooceraea biroi]	23	186	0	46	679	635	1034	42	1143	136	1214	37	78	0	148
CrematogasterSubCLCMeta_rep_c1995	ref|XP_012522925.1| PREDICTED: formin-2 isoform X2 [Monomorium pharaonis]	87	220	377	47	554	658	508	325	636	170	294	319	500	28	482
CrematogasterSubCLCMeta_rep_c1996	ref|XP_018395582.1| PREDICTED: protein tramtrack, alpha isoform [Cyphomyrmex costatus]	62	1878	2958	150	14	3190	23	46	32	4	133	2037	101	3061	2793
CrematogasterSubCLCMeta_rep_c1997	ref|XP_011689416.1| PREDICTED: alanine--tRNA ligase, mitochondrial isoform X1 [Wasmannia auropunctata]	381	69	269	211	227	178	321	377	405	316	700	99	306	284	96
CrematogasterSubCLCMeta_rep_c1998	ref|XP_011156776.1| PREDICTED: chaoptin-like [Solenopsis invicta]	107	264	462	95	429	471	429	246	670	113	429	373	435	62	314
CrematogasterSubCLCMeta_rep_c1999	ref|XP_011880862.1| PREDICTED: piezo-type mechanosensitive ion channel component 2 isoform X6 [Vollenhovia emeryi]	615	645	1700	589	878	2051	611	1022	1136	549	1858	890	1467	1170	1155
CrematogasterSubCLCMeta_rep_c2000	#N/A	9	118	2	29	99	194	113	5	128	14	122	62	24	0	77
CrematogasterSubCLCMeta_rep_c2001	ref|XP_018318228.1| PREDICTED: factor VIII intron 22 protein-like [Trachymyrmex zeteki]	390	291	448	521	297	8	354	306	390	515	332	313	364	261	274
CrematogasterSubCLCMeta_rep_c2002	ref|XP_012543592.1| PREDICTED: probable cation-transporting ATPase 13A3 [Monomorium pharaonis]	571	136	237	571	529	328	462	440	582	439	2149	182	467	225	247
CrematogasterSubCLCMeta_rep_c2003	ref|XP_011687133.1| PREDICTED: nipped-B-like protein B [Wasmannia auropunctata]	720	170	321	624	838	300	867	653	863	495	1269	265	815	527	561
CrematogasterSubCLCMeta_rep_c2004	#N/A	108	179	111	223	232	336	179	212	247	219	524	149	176	118	167
CrematogasterSubCLCMeta_rep_c2005	ref|XP_011644878.1| PREDICTED: synaptotagmin-10-like [Pogonomyrmex barbatus]	0	79	6	6	151	170	135	1	133	0	105	128	10	5	119
CrematogasterSubCLCMeta_rep_c2006	ref|XP_011642281.1| PREDICTED: palmitoyltransferase ZDHHC9 isoform X2 [Pogonomyrmex barbatus]	164	164	37	92	109	125	90	45	120	0	82	83	73	24	67
[truncated: 58,187 more rows]

## Sheet: B - Camponotus
target_id	BLAST result	51_PAR_Ca_FB1	53_PAR_Ca_FB1	55_PAR_Ca_FB1	59_PAR_Ca_FB1	63_PAR_Ca_FB2	74_PAR_Ca_FB2	76_PAR_Ca_FB1	77_PAR_Ca_FB2	218_PAT_Ca_FB1	232_PAT_Ca_FB2	240_PAT_Ca_FB2	242_PAT_Ca_FB1
CamponotusSubCLCMeta_c1	ref|XP_018395464.1| PREDICTED: ras-specific guanine nucleotide-releasing factor 1-like [Cyphomyrmex costatus]	147	121	273	1410	297	221	181	148	161	151	208	178
CamponotusSubCLCMeta_c2	ref|XP_011265874.2| PREDICTED: major royal jelly protein 1 [Camponotus floridanus]	38	16	34	162	17	41	28	32	34	43	59	28
CamponotusSubCLCMeta_c3	ref|XP_011267197.1| PREDICTED: protein turtle isoform X7 [Camponotus floridanus]	1966	1657	3035	4313	2710	2027	1424	2095	2171	1391	2589	2018
CamponotusSubCLCMeta_c4	ref|XP_011266955.1| PREDICTED: alpha-catulin isoform X1 [Camponotus floridanus]	54	41	41	506	69	48	63	34	13	31	50	32
CamponotusSubCLCMeta_c5	ref|XP_011250603.1| PREDICTED: synaptic vesicle glycoprotein 2B [Camponotus floridanus]	45	61	3	0	59	3	16	0	1	0	304	39
CamponotusSubCLCMeta_c6	#N/A	23	18	20	11	16	14	12	34	68	0	28	7
CamponotusSubCLCMeta_c7	ref|XP_015522188.1| PREDICTED: uncharacterized protein LOC107226030 [Neodiprion lecontei]	46	8	22	19	7	10	13	18	10	10	19	23
CamponotusSubCLCMeta_c8	ref|XP_011883906.1| PREDICTED: uncharacterized protein LOC105571048, partial [Vollenhovia emeryi]	53	66	93	35	137	57	136	60	26	7	0	8
CamponotusSubCLCMeta_c9	ref|XP_011268774.1| PREDICTED: uncharacterized protein LOC105258892 [Camponotus floridanus]	43	32	69	770	104	52	22	72	47	52	57	84
CamponotusSubCLCMeta_c10	ref|XP_020904486.1| E3 ubiquitin-protein ligase MYLIP-like [Exaiptasia pallida]	21	12	10	0	2	1	6	6	3	0	8	0
CamponotusSubCLCMeta_c11	ref|XP_011269490.1| PREDICTED: protein Wnt-7b isoform X3 [Camponotus floridanus]	46	13	18	42	15	16	21	19	7	14	43	27
CamponotusSubCLCMeta_c12	ref|XP_011256399.1| PREDICTED: zinc finger protein 431 isoform X1 [Camponotus floridanus]	73	82	121	42	66	76	85	86	105	67	101	49
CamponotusSubCLCMeta_c13	ref|XP_011260639.1| PREDICTED: protein PTHB1 [Camponotus floridanus]	113	39	85	75	56	57	65	64	60	36	65	58
CamponotusSubCLCMeta_c14	ref|XP_011254391.1| PREDICTED: protoheme IX farnesyltransferase, mitochondrial [Camponotus floridanus]	1089	1095	1182	1401	1136	939	838	774	557	967	849	903
CamponotusSubCLCMeta_c15	ref|XP_011680762.1| PREDICTED: uncharacterized protein LOC583642 [Strongylocentrotus purpuratus]	0	1	2	8	11	4	0	0	4	0	6	0
CamponotusSubCLCMeta_c16	ref|XP_011269372.1| PREDICTED: EF-hand domain-containing family member C2 [Camponotus floridanus]	55	11	11	87	20	24	27	38	27	27	28	11
CamponotusSubCLCMeta_c17	ref|XP_011255570.1| PREDICTED: nephrin isoform X3 [Camponotus floridanus]	28	12	26	142	7	19	10	35	23	23	9	13
CamponotusSubCLCMeta_c18	ref|XP_011642114.1| PREDICTED: eukaryotic translation initiation factor 3 subunit B [Pogonomyrmex barbatus]	4	8	3	1	0	3	5	7	4	5	6	2
CamponotusSubCLCMeta_c19	ref|XP_011252584.1| PREDICTED: zinc finger protein 184 isoform X1 [Camponotus floridanus]	2362	4424	4331	2161	4218	5055	4290	2390	2455	1303	2852	3070
CamponotusSubCLCMeta_c20	ref|XP_011255855.1| PREDICTED: uncharacterized protein LOC105251046 [Camponotus floridanus]	257	147	296	704	301	237	145	183	253	84	241	273
CamponotusSubCLCMeta_c21	ref|XP_011696714.1| PREDICTED: uncharacterized protein LOC105455228 isoform X1 [Wasmannia auropunctata]	24	17	39	40	12	23	15	19	24	24	17	11
CamponotusSubCLCMeta_c22	ref|XP_015115968.1| PREDICTED: uncharacterized protein LOC107040403, partial [Diachasma alloeum]	4	4	11	12	7	3	9	8	5	8	11	19
CamponotusSubCLCMeta_c23	ref|XP_019883040.1| PREDICTED: uncharacterized protein LOC105251178 isoform X5 [Camponotus floridanus]	185	244	358	926	461	218	215	260	168	134	224	181
CamponotusSubCLCMeta_c24	ref|XP_014278876.1| PREDICTED: small subunit processome component 20 homolog [Halyomorpha halys]	5	8	0	9	2	2	2	7	4	2	9	11
CamponotusSubCLCMeta_c25	ref|XP_018373152.1| PREDICTED: RNA-directed DNA polymerase from mobile element jockey-like [Trachymyrmex cornetzi]	11	13	12	118	14	47	10	19	9	226	288	220
CamponotusSubCLCMeta_c26	ref|XP_018406278.1| PREDICTED: uncharacterized protein LOC108782494 [Cyphomyrmex costatus]	1227	19	90	80	239	74	80	3	151	5	25	39
CamponotusSubCLCMeta_c27	ref|XP_011254252.1| PREDICTED: protein disabled [Camponotus floridanus]	82	56	71	762	149	109	85	80	341	148	213	349
CamponotusSubCLCMeta_c28	ref|XP_002741260.2| PREDICTED: nucleoside diphosphate-linked moiety X motif 19, mitochondrial-like [Saccoglossus kowalevskii]	0	2	2	1	0	10	0	26	4	0	8	0
CamponotusSubCLCMeta_c29	ref|XP_011253288.1| PREDICTED: probable nuclear hormone receptor HR3 [Camponotus floridanus]	26	21	32	84	39	24	19	19	16	3	2	18
CamponotusSubCLCMeta_c30	ref|XP_011253758.1| PREDICTED: glycogen-binding subunit 76A [Camponotus floridanus]	1711	609	2823	1205	789	853	2055	1276	383	1987	1213	2945
CamponotusSubCLCMeta_c31	ref|XP_015125224.1| PREDICTED: collagen alpha-1(XI) chain-like, partial [Diachasma alloeum]	1	12	12	19	16	13	14	14	32	3	32	6
CamponotusSubCLCMeta_c32	ref|XP_308469.4| AGAP007342-PA [Anopheles gambiae str. PEST]	47	23	34	117	67	36	32	36	45	19	45	55
CamponotusSubCLCMeta_c33	#N/A	233	47	52	65	131	99	55	57	125	24	97	116
CamponotusSubCLCMeta_c34	ref|XP_011262304.1| PREDICTED: phosrestin-2 [Camponotus floridanus]	33	15	13	124	36	9	14	16	33	19	41	37
CamponotusSubCLCMeta_c35	ref|XP_011266302.1| PREDICTED: probable cationic amino acid transporter [Camponotus floridanus]	21	24	29	486	79	18	17	22	37	14	51	64
CamponotusSubCLCMeta_c36	ref|XP_011262678.1| PREDICTED: protein still life, isoform SIF type 1 isoform X4 [Camponotus floridanus]	66	57	82	1600	137	80	92	88	57	35	107	150
CamponotusSubCLCMeta_c37	ref|XP_011864502.1| PREDICTED: uncharacterized protein LOC105560213 [Vollenhovia emeryi]	0	5	3	34	7	2	4	6	0	0	5	16
CamponotusSubCLCMeta_c38	ref|XP_020706683.1| pleckstrin homology domain-containing family G member 5 isoform X4 [Athalia rosae]	75	79	110	883	92	84	121	47	32	21	62	128
CamponotusSubCLCMeta_c39	#N/A	9	6	0	54	6	10	16	13	22	0	13	12
CamponotusSubCLCMeta_c40	#N/A	3	24	8	21	7	14	10	19	32	39	16	11
CamponotusSubCLCMeta_c41	ref|XP_011252883.1| PREDICTED: uncharacterized protein LOC105249254 [Camponotus floridanus]	19	6	23	22	5	2	10	3	10	0	18	14
CamponotusSubCLCMeta_c42	ref|XP_020720385.1| uncharacterized protein LOC110119578 [Bombus terrestris]	13	2	18	14	7	16	5	18	0	2	5	12
CamponotusSubCLCMeta_c43	ref|XP_011878213.1| PREDICTED: golgin subfamily B member 1-like isoform X1 [Vollenhovia emeryi]	44	17	20	63	27	11	13	25	23	16	8	23
CamponotusSubCLCMeta_c44	#N/A	24	41	47	44	51	42	42	41	22	22	37	29
CamponotusSubCLCMeta_c45	ref|XP_011269674.1| PREDICTED: hemicentin-2 [Camponotus floridanus]	23	134	104	23	165	48	42	28	17	0	0	0
CamponotusSubCLCMeta_c46	ref|XP_011262115.1| PREDICTED: LOW QUALITY PROTEIN: RNA-binding protein MEX3B [Camponotus floridanus]	7	5	8	24	6	2	3	14	10	6	5	7
CamponotusSubCLCMeta_c47	ref|XP_011503978.1| PREDICTED: glycine-rich protein 2 [Ceratosolen solmsi marchali]	0	21	0	0	15	0	8	0	9	0	0	0
CamponotusSubCLCMeta_c48	ref|XP_019884892.1| PREDICTED: protein yellow [Camponotus floridanus]	5	4	16	18	13	11	6	1	0	12	17	17
CamponotusSubCLCMeta_c49	ref|XP_011560756.1| PREDICTED: uncharacterized protein LOC105391048 [Plutella xylostella]	2	84	161	84	10	25	276	11	13	0	16	1
CamponotusSubCLCMeta_c50	ref|XP_011260990.1| PREDICTED: uncharacterized protein LOC105254171 [Camponotus floridanus]	26	31	44	302	50	33	36	26	40	10	73	24
CamponotusSubCLCMeta_c51	#N/A	8	10	7	16	4	3	4	11	13	9	18	17
CamponotusSubCLCMeta_c52	ref|XP_012231955.1| PREDICTED: agrin [Linepithema humile]	74	58	38	312	89	26	29	84	101	97	51	72
CamponotusSubCLCMeta_c53	ref|XP_011254771.1| PREDICTED: suppressor of lurcher protein 1 [Camponotus floridanus]	4	60	37	425	52	20	42	17	8	0	0	1
CamponotusSubCLCMeta_c54	#N/A	4	11	4	12	14	15	22	22	67	3	24	7
CamponotusSubCLCMeta_c55	ref|XP_011267671.2| PREDICTED: small conductance calcium-activated potassium channel protein [Camponotus floridanus]	80	57	52	243	45	88	50	28	44	37	56	44
CamponotusSubCLCMeta_c56	ref|XP_020289234.1| sensory neuron membrane protein 1-like isoform X1 [Pseudomyrmex gracilis]	0	24	4	6	9	26	13	0	0	0	6	29
CamponotusSubCLCMeta_c57	#N/A	33	15	35	458	46	28	19	84	75	37	54	47
CamponotusSubCLCMeta_s58	ref|XP_011269585.1| PREDICTED: putative odorant-binding protein A10 [Camponotus floridanus]	0	2	8	0	0	0	7	0	0	0	0	0
CamponotusSubCLCMeta_c59	ref|XP_019883198.1| PREDICTED: regulating synaptic membrane exocytosis protein 2 isoform X2 [Camponotus floridanus]	54	69	95	737	153	23	63	113	89	28	99	106
CamponotusSubCLCMeta_c60	#N/A	13	3	4	40	6	4	7	3	13	0	10	4
CamponotusSubCLCMeta_c61	ref|XP_011258615.1| PREDICTED: homeotic protein spalt-major isoform X3 [Camponotus floridanus]	27	12	25	180	18	18	11	12	16	28	9	48
CamponotusSubCLCMeta_c62	ref|XP_014483166.1| PREDICTED: uncharacterized protein LOC106748808 [Dinoponera quadriceps]	11	7	12	36	8	18	18	13	12	9	20	9
CamponotusSubCLCMeta_c63	ref|XP_011269706.1| PREDICTED: heparan sulfate glucosamine 3-O-sulfotransferase 6 [Camponotus floridanus]	7	4	4	24	1	2	7	4	2	0	3	4
CamponotusSubCLCMeta_c64	ref|XP_012535046.1| PREDICTED: vitellogenin-2-like [Monomorium pharaonis]	73	1	95	126	21	115	9	9	105	7	168	9
CamponotusSubCLCMeta_c65	ref|XP_019882686.1| PREDICTED: glycine-rich cell wall structural protein [Camponotus floridanus]	6646	4746	4222	4934	3810	4319	9071	11750	10244	6492	6876	3366
CamponotusSubCLCMeta_c66	ref|XP_018394917.1| PREDICTED: roundabout homolog 2-like [Cyphomyrmex costatus]	250	231	359	575	395	314	288	270	313	323	354	392
CamponotusSubCLCMeta_c67	ref|XP_018340983.1| PREDICTED: protein PFF0380w-like isoform X1 [Trachymyrmex septentrionalis]	0	28	26	9	14	22	20	12	38	11	22	14
CamponotusSubCLCMeta_c68	ref|XP_018349740.1| PREDICTED: probable basic-leucine zipper transcription factor R isoform X1 [Trachymyrmex septentrionalis]	21	0	8	23	8	15	10	2	29	6	6	11
CamponotusSubCLCMeta_c69	ref|XP_011265830.1| PREDICTED: ionotropic receptor 25a [Camponotus floridanus]	36	17	40	0	17	46	31	11	46	60	62	33
CamponotusSubCLCMeta_c70	ref|XP_019885262.1| PREDICTED: kinesin-like protein KIF12, partial [Camponotus floridanus]	55	77	32	77	33	28	112	17	29	32	32	43
CamponotusSubCLCMeta_c71	#N/A	70	50	44	273	73	36	72	59	35	44	39	59
CamponotusSubCLCMeta_c72	#N/A	1	2	1	19	1	11	3	3	10	12	11	9
CamponotusSubCLCMeta_c73	#N/A	12	14	17	28	20	8	14	2	11	31	20	13
CamponotusSubCLCMeta_c74	ref|XP_011684304.1| PREDICTED: PH domain leucine-rich repeat-containing protein phosphatase 2 [Wasmannia auropunctata]	46	67	53	58	38	37	22	16	17	50	57	99
CamponotusSubCLCMeta_c75	ref|XP_011258398.1| PREDICTED: uncharacterized protein LOC105252625 [Camponotus floridanus]	2603	2172	2505	2632	1837	2150	2186	2677	2064	2423	2162	2423
CamponotusSubCLCMeta_c76	ref|XP_011252408.1| PREDICTED: voltage-dependent calcium channel subunit alpha-2/delta-3 [Camponotus floridanus]	124	78	86	1559	180	98	69	132	60	51	117	154
CamponotusSubCLCMeta_c77	ref|XP_018398526.1| PREDICTED: uncharacterized mitochondrial protein AtMg00810-like [Cyphomyrmex costatus]	113	26	62	52	46	161	77	55	44	50	56	93
CamponotusSubCLCMeta_c78	ref|XP_011263315.1| PREDICTED: sushi, von Willebrand factor type A, EGF and pentraxin domain-containing protein 1 [Camponotus floridanus]	69	7	37	31	57	8	23	68	78	34	44	12
CamponotusSubCLCMeta_c79	ref|XP_011259116.1| PREDICTED: sodium-dependent dopamine transporter [Camponotus floridanus]	296	768	1903	983	432	923	2706	665	4291	212	528	1153
CamponotusSubCLCMeta_c80	ref|XP_019885655.1| PREDICTED: uncharacterized protein LOC105259538 [Camponotus floridanus]	646	667	573	642	386	656	555	570	325	487	438	586
CamponotusSubCLCMeta_c81	#N/A	9	19	19	3	4	8	20	6	5	9	21	11
CamponotusSubCLCMeta_c82	ref|XP_011251083.1| PREDICTED: probable tubulin polyglutamylase TTLL1 [Camponotus floridanus]	25	37	41	18	47	11	17	11	16	63	86	110
CamponotusSubCLCMeta_c83	ref|XP_011255505.1| PREDICTED: dual specificity tyrosine-phosphorylation-regulated kinase 2 [Camponotus floridanus]	23	74	77	36	67	111	57	76	26	28	48	21
CamponotusSubCLCMeta_c84	ref|XP_019882706.1| PREDICTED: uncharacterized protein LOC105249945 isoform X3 [Camponotus floridanus]	35	21	20	38	31	6	22	7	10	9	35	13
CamponotusSubCLCMeta_c85	ref|XP_011697679.1| PREDICTED: uncharacterized protein LOC105455787 isoform X2 [Wasmannia auropunctata]	25	18	51	330	0	21	0	152	109	24	92	20
CamponotusSubCLCMeta_c86	ref|XP_011263854.2| PREDICTED: uncharacterized protein LOC105255966 [Camponotus floridanus]	1	10	20	4	4	19	13	2	5	5	4	6
CamponotusSubCLCMeta_c87	ref|XP_003492996.1| PREDICTED: chaperonin CPN60-2, mitochondrial-like [Bombus impatiens]	2	116	0	0	803	12	26	0	46	0	0	0
CamponotusSubCLCMeta_c88	ref|XP_011151485.1| PREDICTED: acyl-CoA dehydrogenase family member 9, mitochondrial [Harpegnathos saltator]	6	4	0	0	9	4	3	0	3	12	5	0
CamponotusSubCLCMeta_c89	#N/A	13	9	10	17	41	21	5	8	24	19	36	20
CamponotusSubCLCMeta_c90	ref|XP_019882382.1| PREDICTED: disks large homolog 5 isoform X1 [Camponotus floridanus]	268	58	153	536	103	61	45	79	72	51	112	301
CamponotusSubCLCMeta_c91	ref|XP_011252218.1| PREDICTED: cadherin-86C [Camponotus floridanus]	43	9	15	23	30	30	21	33	17	27	27	25
CamponotusSubCLCMeta_c92	ref|XP_011265178.1| PREDICTED: cathepsin O [Camponotus floridanus]	17	13	4	27	13	19	31	35	4	20	0	12
CamponotusSubCLCMeta_c93	ref|XP_019885152.1| PREDICTED: LOW QUALITY PROTEIN: calmodulin-binding transcription activator 2 [Camponotus floridanus]	462	303	331	1293	552	550	231	443	327	258	419	444
CamponotusSubCLCMeta_c94	#N/A	27	29	14	44	1	28	22	16	9	14	22	31
CamponotusSubCLCMeta_c95	#N/A	2	12	4	188	47	7	17	5	15	8	19	31
CamponotusSubCLCMeta_c96	ref|XP_011266770.1| PREDICTED: T-box transcription factor TBX20 [Camponotus floridanus]	41	7	11	133	19	4	3	9	18	14	22	13
CamponotusSubCLCMeta_c97	#N/A	12	12	6	13	27	47	18	28	21	16	9	22
CamponotusSubCLCMeta_c98	ref|XP_011263281.1| PREDICTED: putative leucine-rich repeat-containing protein DDB_G0290503 [Camponotus floridanus]	84	229	304	167	350	252	191	128	31	102	128	89
CamponotusSubCLCMeta_c99	ref|XP_011253597.1| PREDICTED: AP-2 complex subunit alpha isoform X1 [Camponotus floridanus]	1601	1108	1166	1453	901	982	854	863	701	2031	1233	980
CamponotusSubCLCMeta_c100	ref|XP_011255517.1| PREDICTED: WASH complex subunit CCDC53 isoform X1 [Camponotus floridanus]	3049	3769	3114	3895	4073	3639	2895	3407	2993	3542	3661	3091
CamponotusSubCLCMeta_c101	ref|XP_011256835.1| PREDICTED: homeobox protein B-H2 [Camponotus floridanus]	47	26	41	8	50	25	46	42	21	31	57	45
CamponotusSubCLCMeta_c102	ref|XP_019883579.1| PREDICTED: cGMP-specific 3',5'-cyclic phosphodiesterase [Camponotus floridanus]	65	31	27	1065	166	35	14	34	49	22	15	29
CamponotusSubCLCMeta_c103	ref|XP_001359955.1| uncharacterized protein Dpse_GA20187 [Drosophila pseudoobscura pseudoobscura]	1	10	11	181	11	4	6	8	10	5	24	19
CamponotusSubCLCMeta_c104	ref|XP_011263529.1| PREDICTED: ankycorbin isoform X1 [Camponotus floridanus]	161	145	131	215	164	132	107	179	95	114	234	134
CamponotusSubCLCMeta_c105	ref|XP_002050869.1| uncharacterized protein Dvir_GJ19963 [Drosophila virilis]	109	64	60	67	60	43	35	34	29	65	43	36
CamponotusSubCLCMeta_c106	ref|XP_018573014.1| PREDICTED: ATP-binding cassette sub-family G member 4 [Anoplophora glabripennis]	5	13	6	0	4	14	3	11	0	0	5	1
CamponotusSubCLCMeta_c107	ref|XP_011256993.1| PREDICTED: rho GTPase-activating protein 100F isoform X2 [Camponotus floridanus]	51	29	30	1045	112	30	38	29	48	23	34	83
CamponotusSubCLCMeta_c108	ref|XP_011858111.1| PREDICTED: uncharacterized protein LOC105555691 [Vollenhovia emeryi]	72	33	66	115	23	3	33	43	37	70	63	77
CamponotusSubCLCMeta_c109	ref|XP_019883998.1| PREDICTED: dynein heavy chain 10, axonemal [Camponotus floridanus]	14	0	2	11	3	6	2	12	9	5	8	4
CamponotusSubCLCMeta_c110	ref|XP_018900117.1| PREDICTED: evolutionarily conserved signaling intermediate in Toll pathway, mitochondrial [Bemisia tabaci]	2	0	6	9	26	15	28	5	0	18	12	7
CamponotusSubCLCMeta_c111	ref|XP_013193344.1| PREDICTED: uncharacterized protein LOC106137127 [Amyelois transitella]	14	12	15	8	6	11	4	16	10	9	6	12
CamponotusSubCLCMeta_c112	ref|XP_019883732.1| PREDICTED: ankyrin repeat and BTB/POZ domain-containing protein BTBD11 isoform X1 [Camponotus floridanus]	66	95	209	312	77	60	73	264	350	37	68	86
CamponotusSubCLCMeta_c113	ref|XP_309874.4| AGAP010834-PA [Anopheles gambiae str. PEST]	0	0	0	0	14	16	4	2	0	6519	7064	32489
CamponotusSubCLCMeta_c114	ref|XP_019882198.1| PREDICTED: uncharacterized protein LOC105248481 [Camponotus floridanus]	49	24	32	140	42	16	43	52	53	27	72	107
CamponotusSubCLCMeta_c115	#N/A	14	20	14	282	42	21	15	11	22	1	22	9
CamponotusSubCLCMeta_c116	ref|XP_011257378.1| PREDICTED: agrin isoform X5 [Camponotus floridanus]	38	30	42	152	72	31	46	35	69	10	84	50
CamponotusSubCLCMeta_c117	ref|XP_019886813.1| PREDICTED: LOW QUALITY PROTEIN: uncharacterized protein LOC105278470 [Ooceraea biroi]	256	91	178	305	172	101	316	217	157	46	384	497
CamponotusSubCLCMeta_c118	ref|XP_011160545.1| PREDICTED: glyceraldehyde-3-phosphate dehydrogenase 2-like [Solenopsis invicta]	18	0	23	22	5	29	1	2	28	2	28	2
CamponotusSubCLCMeta_c119	ref|XP_019885233.1| PREDICTED: PR domain zinc finger protein 1 [Camponotus floridanus]	45	12	18	211	66	22	12	8	25	11	15	20
CamponotusSubCLCMeta_c120	#N/A	10	2	18	41	15	6	4	13	12	3	12	19
CamponotusSubCLCMeta_c121	ref|XP_019884581.1| PREDICTED: myb protein isoform X2 [Camponotus floridanus]	1170	982	1117	1310	734	898	691	920	805	947	956	1147
CamponotusSubCLCMeta_c122	ref|XP_011253983.1| PREDICTED: dentin sialophosphoprotein [Camponotus floridanus]	98	75	63	403	94	46	61	152	106	48	99	170
CamponotusSubCLCMeta_c123	ref|XP_019885314.1| PREDICTED: protein slit [Camponotus floridanus]	43	20	21	65	9	15	21	31	23	35	68	33
CamponotusSubCLCMeta_c124	ref|XP_011674208.1| PREDICTED: pyroglutamylated RFamide peptide receptor-like [Strongylocentrotus purpuratus]	43	18	25	79	22	20	35	17	32	20	24	21
CamponotusSubCLCMeta_rep_c125	#N/A	153	183	172	208	168	185	194	131	92	117	118	160
CamponotusSubCLCMeta_rep_c126	ref|XP_018050414.1| PREDICTED: troponin I 3-like isoform X7 [Atta colombica]	1350	566	436	871	983	679	598	278	455	1185	678	303
CamponotusSubCLCMeta_rep_c127	ref|XP_019883799.1| PREDICTED: sex-lethal homolog isoform X3 [Camponotus floridanus]	260	175	238	1158	424	170	112	222	241	164	196	170
CamponotusSubCLCMeta_rep_c128	ref|XP_011261787.1| PREDICTED: nuclear receptor coactivator 2 isoform X5 [Camponotus floridanus]	2439	1550	2457	3756	1980	1940	1607	2127	4602	2002	2504	3093
CamponotusSubCLCMeta_rep_c129	ref|XP_011265936.1| PREDICTED: acetylcholinesterase [Camponotus floridanus]	689	744	701	4154	1264	167	583	581	683	639	627	704
CamponotusSubCLCMeta_rep_c130	ref|XP_011250904.1| PREDICTED: neuroligin-1 [Camponotus floridanus]	159	84	148	568	145	81	108	151	151	164	209	179
CamponotusSubCLCMeta_rep_c131	ref|XP_011259726.1| PREDICTED: regulator of G-protein signaling 17 isoform X6 [Camponotus floridanus]	179	87	52	1501	229	44	32	138	122	232	151	197
CamponotusSubCLCMeta_rep_c132	ref|XP_011252128.2| PREDICTED: uncharacterized protein LOC105248820 isoform X1 [Camponotus floridanus]	97	85	79	740	257	94	60	76	47	84	138	156
CamponotusSubCLCMeta_rep_c133	#N/A	55	68	43	349	61	51	46	46	45	10	87	53
CamponotusSubCLCMeta_rep_c134	ref|XP_011267848.1| PREDICTED: uncharacterized protein LOC105258335 [Camponotus floridanus]	142	164	235	583	160	194	128	142	101	84	148	180
CamponotusSubCLCMeta_rep_c135	ref|XP_011258445.1| PREDICTED: zinc finger protein Xfin isoform X1 [Camponotus floridanus]	723	694	674	669	677	590	633	659	502	639	834	1027
CamponotusSubCLCMeta_rep_c136	ref|XP_011257436.1| PREDICTED: sodium/potassium/calcium exchanger 4 isoform X1 [Camponotus floridanus]	564	234	295	753	274	160	125	326	197	423	281	310
CamponotusSubCLCMeta_rep_c137	ref|XP_011257758.1| PREDICTED: transcription factor Sp4 [Camponotus floridanus]	2972	2375	3210	3140	3038	2759	2328	2228	2054	2309	2822	2724
CamponotusSubCLCMeta_rep_c138	ref|XP_011262704.1| PREDICTED: ELKS/Rab6-interacting/CAST family member 1 isoform X5 [Camponotus floridanus]	95	15	90	1313	166	69	50	108	104	10	38	85
CamponotusSubCLCMeta_rep_c139	ref|XP_012251034.1| uncharacterized protein LOC105683177 isoform X1 [Athalia rosae]	70	44	59	182	58	38	83	70	98	109	85	80
CamponotusSubCLCMeta_rep_c140	ref|XP_011258473.1| PREDICTED: calcium-dependent secretion activator isoform X2 [Camponotus floridanus]	619	671	639	4178	1228	685	461	712	627	391	840	878
CamponotusSubCLCMeta_rep_c141	ref|XP_011254197.1| PREDICTED: uncharacterized protein LOC105250034 [Camponotus floridanus]	212	346	352	221	512	338	380	235	215	92	273	125
CamponotusSubCLCMeta_rep_c142	ref|XP_011256313.1| PREDICTED: sushi, von Willebrand factor type A, EGF and pentraxin domain-containing protein 1 isoform X1 [Camponotus floridanus]	465	239	222	495	382	157	177	616	174	347	452	766
CamponotusSubCLCMeta_rep_c143	#N/A	232	381	427	354	811	283	201	147	97	197	270	207
CamponotusSubCLCMeta_rep_c144	ref|XP_011267506.1| PREDICTED: coatomer subunit epsilon [Camponotus floridanus]	141	90	150	144	116	186	162	1077	582	1517	101	119
CamponotusSubCLCMeta_rep_c145	ref|XP_011266706.1| PREDICTED: longitudinals lacking protein, isoforms H/M/V isoform X4 [Camponotus floridanus]	15384	13397	13802	19713	12769	11992	10184	10531	9947	10595	14033	14371
CamponotusSubCLCMeta_rep_c146	ref|XP_012217137.1| PREDICTED: actin-related protein 8 isoform X1 [Linepithema humile]	284	327	474	400	365	400	370	248	143	294	235	348
CamponotusSubCLCMeta_rep_c147	ref|XP_011256225.1| PREDICTED: rho guanine nucleotide exchange factor 18 isoform X3 [Camponotus floridanus]	1299	1048	1087	1665	1052	918	930	1444	971	978	1281	1386
CamponotusSubCLCMeta_rep_c148	ref|XP_019882542.1| PREDICTED: uncharacterized protein LOC105249427 [Camponotus floridanus]	1480	961	1051	2501	869	1039	618	845	751	1354	962	1077
CamponotusSubCLCMeta_rep_c149	ref|XP_011266429.1| PREDICTED: GRAM domain-containing protein 2 isoform X1 [Camponotus floridanus]	6478	9059	10928	6817	8149	8444	7663	4269	4684	11619	6646	5020
CamponotusSubCLCMeta_rep_c150	ref|XP_011268035.1| PREDICTED: lysine--tRNA ligase isoform X2 [Camponotus floridanus]	1369	1570	1778	1157	1821	2443	1952	1015	702	930	1124	1047
CamponotusSubCLCMeta_rep_c151	ref|XP_011268951.1| PREDICTED: dystrophin isoform X7 [Camponotus floridanus]	4376	4739	5018	4322	3016	3659	4258	3210	2472	3245	3791	4330
CamponotusSubCLCMeta_rep_c152	ref|XP_011254799.1| PREDICTED: segmentation protein cap'n'collar isoform X1 [Camponotus floridanus]	13155	11825	12619	6432	10183	12603	10825	15124	9842	10566	11470	10438
CamponotusSubCLCMeta_rep_c153	ref|XP_019884636.1| PREDICTED: innexin inx3 [Camponotus floridanus]	131	79	47	356	81	76	96	107	150	86	212	306
CamponotusSubCLCMeta_rep_c154	ref|XP_011267183.1| PREDICTED: protein borderless isoform X1 [Camponotus floridanus]	810	307	522	1317	323	436	231	235	291	1033	670	514
CamponotusSubCLCMeta_rep_c155	ref|XP_011257280.1| PREDICTED: uncharacterized protein LOC105251842 isoform X10 [Camponotus floridanus]	345	277	224	2464	822	405	490	211	339	242	223	267
CamponotusSubCLCMeta_rep_c156	ref|XP_011266353.1| PREDICTED: zinc finger CCCH domain-containing protein 18 isoform X1 [Camponotus floridanus]	56634	49177	44361	58705	76647	52566	41477	41272	47319	52139	47984	38104
CamponotusSubCLCMeta_rep_c157	ref|XP_011269460.1| PREDICTED: uncharacterized protein LOC105259282 isoform X3 [Camponotus floridanus]	8174	7404	8760	12842	8398	9317	13126	6560	6370	6455	6969	10916
CamponotusSubCLCMeta_rep_c158	ref|XP_014488061.1| PREDICTED: sphingomyelin phosphodiesterase isoform X2 [Dinoponera quadriceps]	5992	3459	3622	3421	4370	5653	6465	4707	3110	9109	5261	1893
CamponotusSubCLCMeta_rep_c159	ref|XP_011268740.1| PREDICTED: manganese-transporting ATPase 13A1 [Camponotus floridanus]	1453	93	113	1108	142	169	182	1219	721	1076	1215	860
CamponotusSubCLCMeta_c160	#N/A	261	724	668	474	573	569	599	660	598	235	614	626
CamponotusSubCLCMeta_rep_c161	ref|XP_018349042.1| PREDICTED: Down syndrome cell adhesion molecule-like protein Dscam2 isoform X2 [Trachymyrmex septentrionalis]	358	248	198	429	316	124	458	542	482	239	781	764
CamponotusSubCLCMeta_rep_c162	ref|XP_011265386.1| PREDICTED: uncharacterized protein LOC105256850 [Camponotus floridanus]	990	963	854	984	979	923	686	974	752	865	1096	916
CamponotusSubCLCMeta_rep_c163	ref|XP_011267715.1| PREDICTED: lissencephaly-1 homolog [Camponotus floridanus]	966	119	243	1421	119	174	80	727	739	1117	608	1042
CamponotusSubCLCMeta_rep_c164	ref|XP_011268300.1| PREDICTED: cell division cycle and apoptosis regulator protein 1 isoform X1 [Camponotus floridanus]	634	683	669	564	651	709	509	416	288	359	670	593
CamponotusSubCLCMeta_rep_c165	ref|XP_019884807.1| PREDICTED: uncharacterized protein LOC105256742 [Camponotus floridanus]	28	177	246	62	218	183	86	27	23	20	0	0
CamponotusSubCLCMeta_rep_c166	ref|XP_011257127.1| PREDICTED: uncharacterized protein LOC105251801 isoform X2 [Camponotus floridanus]	57	45	72	488	130	84	61	73	57	56	70	91
CamponotusSubCLCMeta_c167	#N/A	313	150	230	315	66	104	54	87	60	348	156	171
CamponotusSubCLCMeta_rep_c168	ref|XP_019882251.1| PREDICTED: early growth response protein 1 [Camponotus floridanus]	128	209	176	276	188	272	161	107	81	139	245	197
CamponotusSubCLCMeta_rep_c169	ref|XP_019884375.1| PREDICTED: SH3 and multiple ankyrin repeat domains protein 1 isoform X2 [Camponotus floridanus]	385	445	130	1245	438	230	763	229	554	201	232	218
CamponotusSubCLCMeta_rep_c170	ref|XP_012534014.1| PREDICTED: cytoplasmic aconitate hydratase-like isoform X2 [Monomorium pharaonis]	1672	1536	2163	970	2021	2544	1507	1508	1393	1105	1506	1026
CamponotusSubCLCMeta_rep_c171	ref|XP_011255523.1| PREDICTED: embryonic polarity protein dorsal-like isoform X1 [Camponotus floridanus]	2349	1632	1844	4131	4113	1996	1625	2341	2530	4095	3593	2465
CamponotusSubCLCMeta_rep_c172	ref|XP_011259491.1| PREDICTED: excitatory amino acid transporter 1 isoform X1 [Camponotus floridanus]	2026	2589	2615	1773	2960	2531	3161	2422	1434	1624	1477	1442
CamponotusSubCLCMeta_rep_c173	ref|XP_018393503.1| PREDICTED: apolipophorins [Cyphomyrmex costatus]	315	36	324	311	93	449	123	51	393	57	485	80
CamponotusSubCLCMeta_rep_c174	ref|XP_011253792.1| PREDICTED: palmitoyltransferase ZDHHC18 isoform X2 [Camponotus floridanus]	1444	1289	1358	1142	1131	1278	1157	1611	1253	1195	1201	1285
CamponotusSubCLCMeta_rep_c175	ref|XP_012226740.1| PREDICTED: collagen alpha-1(XVIII) chain isoform X8 [Linepithema humile]	1604	1668	1686	1969	1918	1542	7049	1774	2202	1773	1925	2169
CamponotusSubCLCMeta_rep_c176	ref|XP_011250913.1| PREDICTED: SH3 domain-containing protein 19 [Camponotus floridanus]	780	1294	1314	659	1377	1530	977	691	598	635	1080	978
CamponotusSubCLCMeta_rep_c177	ref|XP_022245657.1| rho guanine nucleotide exchange factor 25-like [Limulus polyphemus]	55	48	114	493	40	58	94	245	41	16	131	170
CamponotusSubCLCMeta_rep_c178	ref|XP_011252345.1| PREDICTED: sex peptide receptor [Camponotus floridanus]	336	43	9	507	203	50	1	7	4	251	1	6
CamponotusSubCLCMeta_rep_c179	ref|XP_011257365.1| PREDICTED: hairy/enhancer-of-split related with YRPW motif protein 2 isoform X1 [Camponotus floridanus]	1411	1063	1582	1620	1113	1773	1728	2363	2316	1422	2002	2364
CamponotusSubCLCMeta_rep_c180	ref|XP_011258197.1| PREDICTED: catenin delta-2 isoform X5 [Camponotus floridanus]	971	601	765	1351	433	519	481	753	639	926	1094	1043
CamponotusSubCLCMeta_rep_c181	ref|XP_018340797.1| PREDICTED: muscleblind-like protein 1 [Trachymyrmex septentrionalis]	44	67	50	41	37	60	73	52	65	25	59	63
CamponotusSubCLCMeta_rep_c182	ref|XP_019884362.1| PREDICTED: uncharacterized protein LOC105255913 [Camponotus floridanus]	1264	1001	1739	1000	1447	1502	785	949	982	939	1148	1350
CamponotusSubCLCMeta_rep_c183	ref|XP_011258937.1| PREDICTED: uncharacterized protein LOC105252944 [Camponotus floridanus]	1656	991	1224	1762	1313	1159	890	1339	1088	1829	2072	1675
CamponotusSubCLCMeta_rep_c184	ref|XP_011269792.1| PREDICTED: LOW QUALITY PROTEIN: ABC transporter G family member 20 [Camponotus floridanus]	3965	2768	2402	4065	2600	2551	2524	3258	3188	3431	3005	6848
CamponotusSubCLCMeta_c185	ref|XP_011262288.1| PREDICTED: uncharacterized protein LOC105254972 [Camponotus floridanus]	72	36	30	630	7	44	30	123	0	33	70	8
CamponotusSubCLCMeta_rep_c186	ref|XP_011259436.1| PREDICTED: LOW QUALITY PROTEIN: F-box/LRR-repeat protein 14 [Camponotus floridanus]	98	86	74	23	57	78	67	86	86	66	101	91
CamponotusSubCLCMeta_rep_c187	ref|XP_017763447.1| PREDICTED: uncharacterized protein LOC108553163 [Eufriesea mexicana]	104	161	92	147	161	141	90	73	95	147	152	125
CamponotusSubCLCMeta_rep_c188	ref|XP_018365931.1| PREDICTED: protein rogdi [Trachymyrmex cornetzi]	1285	2452	1874	1079	1579	1951	2783	1424	1220	1106	1795	942
CamponotusSubCLCMeta_rep_c189	ref|XP_011252047.1| PREDICTED: DNA-binding protein inhibitor ID-2 [Camponotus floridanus]	1519	982	985	1160	1015	874	662	861	1312	393	764	757
CamponotusSubCLCMeta_rep_c190	ref|XP_011262802.1| PREDICTED: fasciclin-1 isoform X5 [Camponotus floridanus]	3250	4548	3547	4521	4957	2943	4352	2247	2267	3760	2736	1984
CamponotusSubCLCMeta_rep_c191	ref|XP_011252508.1| PREDICTED: band 7 protein AGAP004871 isoform X1 [Camponotus floridanus]	46	145	47	0	95	82	50	19	0	0	0	0
CamponotusSubCLCMeta_rep_c192	ref|XP_011254258.1| PREDICTED: muscle LIM protein Mlp84B isoform X2 [Camponotus floridanus]	57559	62584	32412	79244	105567	52976	76575	38383	82370	75386	100279	56939
CamponotusSubCLCMeta_rep_c193	ref|XP_011266525.1| PREDICTED: gustatory receptor for sugar taste 64e [Camponotus floridanus]	36	35	31	46	28	42	37	44	14	22	21	38
CamponotusSubCLCMeta_rep_c194	ref|XP_011269538.1| PREDICTED: aspartate--tRNA ligase, mitochondrial [Camponotus floridanus]	1826	962	1164	1539	990	1174	908	1257	1132	1177	1124	1329
CamponotusSubCLCMeta_rep_c195	ref|XP_011266349.1| PREDICTED: clathrin heavy chain [Camponotus floridanus]	3988	2099	3019	3051	1888	1705	1805	2888	1816	4210	2336	3337
CamponotusSubCLCMeta_rep_c196	ref|XP_003376361.1| putative sorting nexin-13 [Trichinella spiralis]	286	198	289	284	357	294	201	413	323	125	387	453
CamponotusSubCLCMeta_rep_c197	ref|XP_011262168.1| PREDICTED: zwei Ig domain protein zig-8 [Camponotus floridanus]	35	39	48	507	179	57	28	27	30	48	34	29
CamponotusSubCLCMeta_rep_c198	ref|XP_011267991.1| PREDICTED: endophilin-B1 isoform X4 [Camponotus floridanus]	1339	1332	1156	1681	1080	1244	1068	1366	947	1166	1280	1395
CamponotusSubCLCMeta_rep_c199	ref|XP_011265292.1| PREDICTED: protein argonaute-2 [Camponotus floridanus]	1243	1626	2072	1418	1514	1895	1588	960	1002	1172	1290	1429
CamponotusSubCLCMeta_rep_c200	ref|XP_011266083.1| PREDICTED: circadian locomoter output cycles protein kaput isoform X2 [Camponotus floridanus]	151	9	0	22	10	0	46	228	33	77	204	259
CamponotusSubCLCMeta_rep_c201	ref|XP_011266082.1| PREDICTED: circadian locomoter output cycles protein kaput isoform X1 [Camponotus floridanus]	3775	1475	2104	2716	1429	3460	3047	4524	7300	3956	5223	9533
CamponotusSubCLCMeta_rep_c202	ref|XP_011262973.1| PREDICTED: COP9 signalosome complex subunit 4 [Camponotus floridanus]	4927	3948	3963	4623	4078	4032	2927	4007	3194	3961	3909	3829
CamponotusSubCLCMeta_c203	ref|XP_011257357.1| PREDICTED: E3 ubiquitin-protein ligase Hakai isoform X1 [Camponotus floridanus]	178	191	383	310	283	298	204	169	252	171	346	257
CamponotusSubCLCMeta_rep_c204	ref|XP_011259536.1| PREDICTED: protein SCAI isoform X1 [Camponotus floridanus]	84	48	52	323	78	63	39	67	48	43	73	89
CamponotusSubCLCMeta_rep_c205	ref|XP_018044998.1| PREDICTED: protein WWC2-like [Atta colombica]	61	84	119	74	43	50	59	40	30	34	37	44
CamponotusSubCLCMeta_rep_c206	ref|XP_018357783.1| PREDICTED: uncharacterized protein LOC108757745 [Trachymyrmex cornetzi]	594	345	444	1589	613	358	342	529	221	294	363	247
CamponotusSubCLCMeta_rep_c207	ref|XP_011252071.1| PREDICTED: uncharacterized protein LOC105248785 [Camponotus floridanus]	195	138	90	192	216	66	78	54	103	271	181	102
CamponotusSubCLCMeta_rep_c208	ref|XP_011250641.1| PREDICTED: protein tincar isoform X3 [Camponotus floridanus]	265	218	299	941	390	289	214	364	365	183	266	327
CamponotusSubCLCMeta_rep_c209	ref|XP_011250771.1| PREDICTED: protein TANC2 isoform X3 [Camponotus floridanus]	181	140	158	479	158	66	130	111	212	125	212	137
CamponotusSubCLCMeta_rep_c210	ref|XP_011257702.1| PREDICTED: tyrosine-protein kinase CSK isoform X1 [Camponotus floridanus]	1229	1114	1404	1221	1379	1279	1146	819	578	737	1027	1453
CamponotusSubCLCMeta_rep_c211	ref|XP_011260057.1| PREDICTED: nephrin [Camponotus floridanus]	130	49	125	869	153	30	33	49	79	32	141	72
CamponotusSubCLCMeta_rep_c212	ref|XP_011261299.1| PREDICTED: sestrin-3 isoform X1 [Camponotus floridanus]	8826	327	477	6999	960	967	883	6396	6378	5840	4745	3284
CamponotusSubCLCMeta_rep_c213	ref|XP_011258556.1| PREDICTED: iroquois-class homeodomain protein IRX-6 [Camponotus floridanus]	1138	774	1242	356	1278	1281	675	1784	1126	427	1289	1004
CamponotusSubCLCMeta_rep_c214	ref|XP_011250806.1| PREDICTED: aryl hydrocarbon receptor nuclear translocator-like protein 1 isoform X2 [Camponotus floridanus]	3226	1004	1507	1249	1125	1707	1510	1558	1850	2115	2226	1759
CamponotusSubCLCMeta_rep_c215	ref|XP_011629473.1| PREDICTED: eukaryotic peptide chain release factor subunit 1 isoform X2 [Pogonomyrmex barbatus]	2475	1982	2139	2528	2164	2270	1920	2083	2040	1700	2198	2705
CamponotusSubCLCMeta_rep_c216	ref|XP_019884117.1| PREDICTED: cysteine and histidine-rich protein 1 homolog [Camponotus floridanus]	1088	339	454	1358	468	508	430	851	995	697	834	707
CamponotusSubCLCMeta_rep_c217	ref|XP_011259960.1| PREDICTED: probable G-protein coupled receptor B0563.6 [Camponotus floridanus]	83	15	44	86	60	19	12	4	14	27	10	50
CamponotusSubCLCMeta_rep_c218	ref|XP_012533348.1| PREDICTED: uncharacterized protein LOC105834990 [Monomorium pharaonis]	235	211	194	36	156	79	174	68	200	120	179	94
CamponotusSubCLCMeta_rep_c219	ref|XP_019882751.1| PREDICTED: LOW QUALITY PROTEIN: uncharacterized protein LOC105250109 [Camponotus floridanus]	1345	360	690	1796	663	402	1136	1090	607	974	2010	2113
CamponotusSubCLCMeta_rep_c220	ref|XP_011258095.1| PREDICTED: uncharacterized protein LOC105252439 isoform X1 [Camponotus floridanus]	1993	2304	1996	1933	1906	2218	1808	2458	2782	2167	2284	1865
CamponotusSubCLCMeta_rep_c221	ref|XP_011253201.1| PREDICTED: protein mahjong isoform X1 [Camponotus floridanus]	859	490	732	989	537	583	500	583	681	644	757	763
CamponotusSubCLCMeta_rep_c222	ref|XP_019883945.1| PREDICTED: fasciclin-3 [Camponotus floridanus]	310	430	524	595	384	495	816	414	235	378	545	700
CamponotusSubCLCMeta_rep_c223	ref|XP_011696217.1| PREDICTED: transmembrane protein 47 isoform X1 [Wasmannia auropunctata]	676	486	420	636	398	528	415	625	573	532	591	628
CamponotusSubCLCMeta_rep_c224	ref|XP_019884975.1| PREDICTED: serine/threonine-protein kinase ATR [Camponotus floridanus]	1272	744	999	1417	766	816	578	1235	942	959	1529	1508
CamponotusSubCLCMeta_rep_c225	ref|XP_011259178.1| PREDICTED: zinc finger CCHC domain-containing protein 8 homolog [Camponotus floridanus]	1851	1275	3335	1458	1622	2020	1830	1497	937	1808	1800	1662
CamponotusSubCLCMeta_rep_c226	ref|XP_011264733.1| PREDICTED: cytoplasmic polyadenylation element-binding protein 2 [Camponotus floridanus]	68	66	119	129	109	86	76	117	66	37	75	61
CamponotusSubCLCMeta_rep_c227	ref|XP_011878389.1| PREDICTED: SAM and SH3 domain-containing protein 1-like isoform X3 [Vollenhovia emeryi]	127	207	165	90	99	187	256	145	162	76	89	120
CamponotusSubCLCMeta_rep_c228	ref|XP_011254791.1| PREDICTED: leishmanolysin-like peptidase [Camponotus floridanus]	622	555	673	1230	514	439	565	687	367	603	758	779
CamponotusSubCLCMeta_rep_c229	ref|XP_016914492.1| PREDICTED: gamma-aminobutyric acid receptor subunit beta isoform X1 [Apis cerana]	4	104	102	154	133	95	112	83	90	40	129	58
CamponotusSubCLCMeta_rep_c230	#N/A	49	45	76	37	51	19	55	42	54	27	120	62
CamponotusSubCLCMeta_rep_c231	ref|XP_011266371.1| PREDICTED: uncharacterized protein LOC105257455 isoform X2 [Camponotus floridanus]	6190	3993	3563	5839	4016	5240	3157	7067	3732	3111	5238	6369
CamponotusSubCLCMeta_rep_c232	ref|XP_011262321.1| PREDICTED: uncharacterized protein LOC105254995 [Camponotus floridanus]	728	404	503	735	398	113	314	609	501	688	752	670
CamponotusSubCLCMeta_rep_c233	ref|XP_019883622.1| PREDICTED: balbiani ring protein 3 [Camponotus floridanus]	123	90	86	324	112	115	77	98	82	75	140	126
CamponotusSubCLCMeta_rep_c234	ref|XP_011250676.1| PREDICTED: bifunctional heparan sulfate N-deacetylase/N-sulfotransferase [Camponotus floridanus]	1921	1768	1762	1781	1910	1812	1122	1312	1388	2235	2449	1236
CamponotusSubCLCMeta_rep_c235	ref|XP_011170797.1| PREDICTED: nephrin-like [Solenopsis invicta]	126	92	81	164	96	83	46	64	71	63	104	122
CamponotusSubCLCMeta_rep_c236	ref|XP_012339455.1| PREDICTED: serine-arginine protein 55 isoform X30 [Apis florea]	9844	9435	10794	11374	10563	9446	8478	7830	8158	9011	9884	8724
CamponotusSubCLCMeta_rep_c237	ref|XP_011258896.1| PREDICTED: myosin-I heavy chain isoform X2 [Camponotus floridanus]	166	276	237	387	195	149	249	175	126	62	195	135
CamponotusSubCLCMeta_rep_c238	ref|XP_011258182.1| PREDICTED: elongation factor Ts, mitochondrial [Camponotus floridanus]	2577	2199	1647	1730	1678	3098	2055	2024	2639	1275	1176	1095
CamponotusSubCLCMeta_rep_c239	ref|XP_011256453.1| PREDICTED: clustered mitochondria protein homolog isoform X1 [Camponotus floridanus]	524	1890	808	401	831	615	668	0	0	618	65	0
CamponotusSubCLCMeta_rep_c240	ref|XP_011636912.1| PREDICTED: paramyosin, long form [Pogonomyrmex barbatus]	310	283	231	344	425	459	342	203	343	246	373	286
CamponotusSubCLCMeta_rep_c241	ref|XP_011258911.1| PREDICTED: sodium/potassium-transporting ATPase subunit alpha isoform X2 [Camponotus floridanus]	19157	12767	14466	22403	15714	13159	22969	21761	12542	22970	17591	14759
CamponotusSubCLCMeta_rep_c242	ref|XP_011264501.1| PREDICTED: rho GTPase-activating protein 18 [Camponotus floridanus]	540	374	451	530	362	549	398	516	464	326	366	605
CamponotusSubCLCMeta_rep_c243	ref|XP_011251413.1| PREDICTED: ets DNA-binding protein pokkuri [Camponotus floridanus]	814	1034	1208	753	914	881	1392	696	2063	551	640	753
CamponotusSubCLCMeta_rep_c244	ref|XP_011251476.1| PREDICTED: uncharacterized protein LOC105248410 [Camponotus floridanus]	304	121	110	312	136	215	114	224	111	100	254	174
CamponotusSubCLCMeta_rep_c245	ref|XP_011263257.1| PREDICTED: tensin-3 isoform X1 [Camponotus floridanus]	5011	5571	9946	6961	3826	6268	7591	6724	7072	8721	6389	8964
CamponotusSubCLCMeta_rep_c246	ref|XP_011259240.1| PREDICTED: amyloid protein-binding protein 2 [Camponotus floridanus]	1052	1090	1260	1040	1272	1633	1008	1101	804	927	845	990
CamponotusSubCLCMeta_c247	ref|XP_011259228.1| PREDICTED: MAP kinase-interacting serine/threonine-protein kinase 1 [Camponotus floridanus]	911	1582	2841	2791	2240	1471	3461	4431	402	7175	5731	6177
CamponotusSubCLCMeta_rep_c248	ref|XP_011259705.1| PREDICTED: protein jim lovell [Camponotus floridanus]	174	114	112	384	220	121	109	59	80	123	112	166
CamponotusSubCLCMeta_rep_c249	ref|XP_019883644.1| PREDICTED: uncharacterized protein LOC105253060 isoform X1 [Camponotus floridanus]	80	32	82	932	248	82	57	83	89	73	66	136
CamponotusSubCLCMeta_rep_c250	ref|XP_011629910.1| PREDICTED: translation elongation factor 2 [Pogonomyrmex barbatus]	522	1228	534	786	485	1063	817	688	828	414	548	649
CamponotusSubCLCMeta_rep_c251	ref|XP_011251833.1| PREDICTED: protein N-terminal asparagine amidohydrolase [Camponotus floridanus]	2693	1329	1455	630	1338	1631	1622	2646	3532	1053	1298	965
CamponotusSubCLCMeta_rep_c252	ref|XP_011260843.1| PREDICTED: uncharacterized protein LOC105254067 isoform X1 [Camponotus floridanus]	186	164	222	230	253	222	148	178	132	144	128	65
CamponotusSubCLCMeta_rep_c253	ref|XP_020281838.1| protein neuralized isoform X3 [Pseudomyrmex gracilis]	281	374	611	488	438	375	411	401	396	570	293	514
CamponotusSubCLCMeta_c254	ref|XP_011265044.1| PREDICTED: band 4.1-like protein 4 isoform X1 [Camponotus floridanus]	201	296	189	137	180	296	210	164	110	179	306	238
CamponotusSubCLCMeta_rep_c255	#N/A	36	22	72	11	140	71	23	47	85	18	61	73
CamponotusSubCLCMeta_c256	ref|XP_011262990.1| PREDICTED: kinesin-like protein KIF13B isoform X5 [Camponotus floridanus]	641	2153	1909	404	977	1805	1586	940	1770	1044	1405	1579
CamponotusSubCLCMeta_rep_c257	ref|XP_011268709.1| PREDICTED: MKL/myocardin-like protein 1 [Camponotus floridanus]	1319	798	1185	1408	1315	1043	1073	1010	1068	1215	1235	1111
CamponotusSubCLCMeta_rep_c258	ref|XP_011265126.1| PREDICTED: translationally-controlled tumor protein homolog [Camponotus floridanus]	9904	10128	10045	9462	10125	10414	7061	9465	7737	11984	8343	6995
CamponotusSubCLCMeta_rep_c259	ref|XP_011684908.1| PREDICTED: gamma-aminobutyric acid type B receptor subunit 2 [Wasmannia auropunctata]	22	15	26	256	59	14	23	29	21	19	23	28
CamponotusSubCLCMeta_rep_c260	ref|XP_011250900.1| PREDICTED: major facilitator superfamily domain-containing protein 1 [Camponotus floridanus]	1294	1048	1149	1249	902	1002	777	722	821	1371	1180	1044
CamponotusSubCLCMeta_rep_c261	ref|XP_011342248.1| PREDICTED: homeobox protein abdominal-B [Ooceraea biroi]	41	61	45	474	27	29	20	53	24	104	74	140
CamponotusSubCLCMeta_c262	ref|XP_011689701.1| PREDICTED: cell division cycle protein 27 homolog [Wasmannia auropunctata]	939	323	318	288	435	319	488	286	356	402	581	940
CamponotusSubCLCMeta_rep_c263	ref|XP_019883137.1| PREDICTED: uncharacterized protein LOC105251466 isoform X3 [Camponotus floridanus]	196	29	23	483	9	24	60	87	71	78	27	89
CamponotusSubCLCMeta_rep_c264	#N/A	47	27	92	452	104	42	30	56	27	21	6	35
CamponotusSubCLCMeta_rep_c265	ref|XP_011263735.1| PREDICTED: sortilin-related receptor [Camponotus floridanus]	8772	11027	12340	10124	6203	9361	12480	9443	9480	8194	11193	9687
CamponotusSubCLCMeta_rep_c266	ref|XP_011268072.1| PREDICTED: trifunctional purine biosynthetic protein adenosine-3 [Camponotus floridanus]	898	1854	886	639	1824	841	1151	1231	1675	1373	1395	576
CamponotusSubCLCMeta_rep_c267	ref|XP_011689039.1| PREDICTED: LOW QUALITY PROTEIN: protein Skeletor, isoforms B/C [Wasmannia auropunctata]	28	36	18	424	64	16	12	30	62	27	24	17
CamponotusSubCLCMeta_rep_c268	ref|XP_011268531.1| PREDICTED: uncharacterized protein LOC105258749 [Camponotus floridanus]	41	62	145	11	40	64	50	31	65	65	95	85
CamponotusSubCLCMeta_c269	ref|XP_011264329.1| PREDICTED: protein lev-9 [Camponotus floridanus]	182	139	106	687	162	41	51	215	83	261	192	121
CamponotusSubCLCMeta_rep_c270	ref|XP_014482735.1| PREDICTED: protein FAM102A isoform X5 [Dinoponera quadriceps]	414	403	302	402	155	201	380	240	167	373	268	321
CamponotusSubCLCMeta_rep_c271	ref|XP_011269337.1| PREDICTED: ephrin type-B receptor 1-B isoform X13 [Camponotus floridanus]	575	487	828	1402	605	420	459	407	281	696	637	523
[truncated: 47,937 more rows]

## Sheet: C - BLAST hits Crem
Read	Alignment Title	Score	Bits	eValue	Identity+	Start	Stop
[truncated: 45,016 more rows]

[truncated: 1 more sheets: D - BLAST hits Camp]
